# Supplementary material for: Spatially displaced excitation contributes to the encoding of interrupted motion by a retinal direction-selective circuit
Source: eLife journal article supplement (doi:10.7554/elife.68181), 2021-06-07

Full-field preferred response

**A**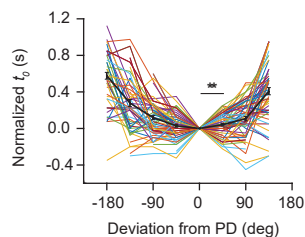

Occlusion null response

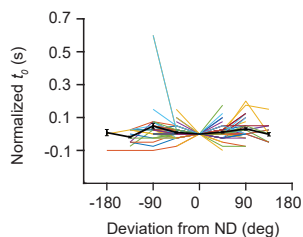**B**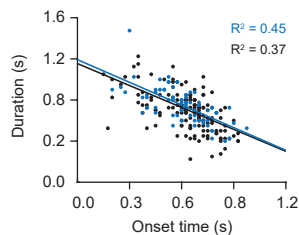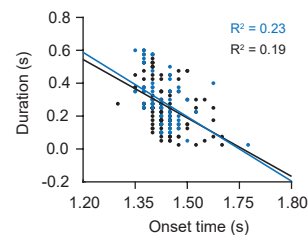**C**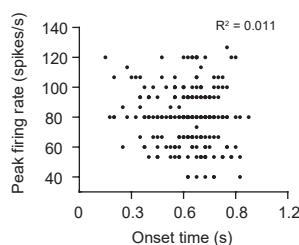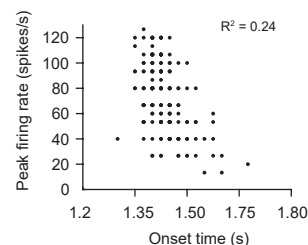**D**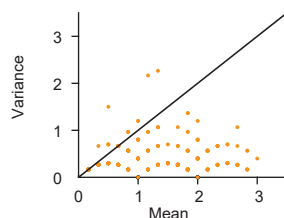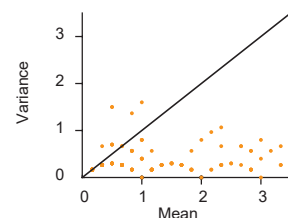**E**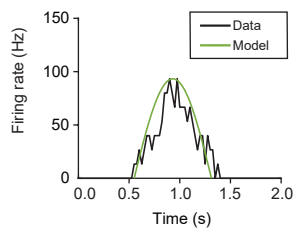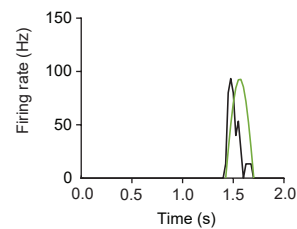**F**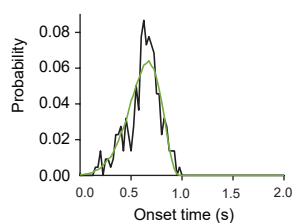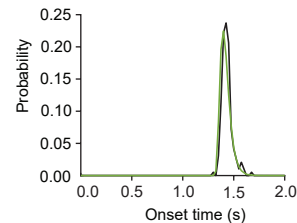**G**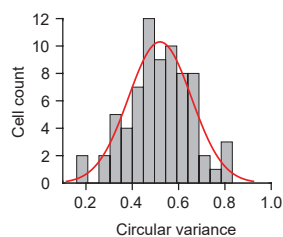**H**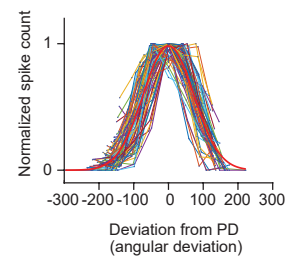

Full-field preferred response

**I**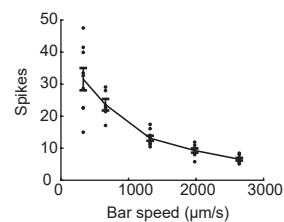

Occlusion null response

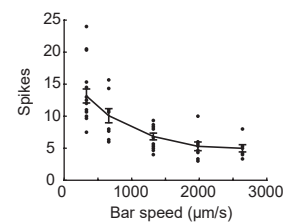**J**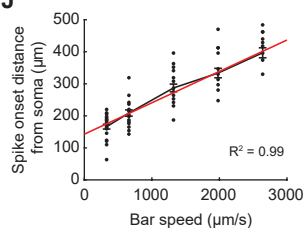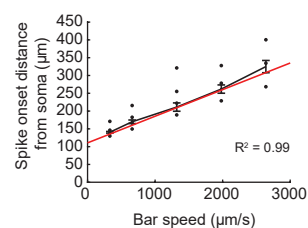**K**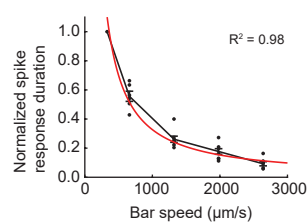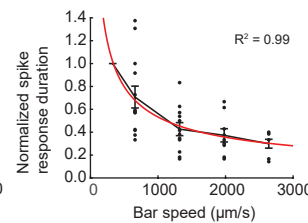**L**

IPSC - EPSC onset time difference in preferred direction

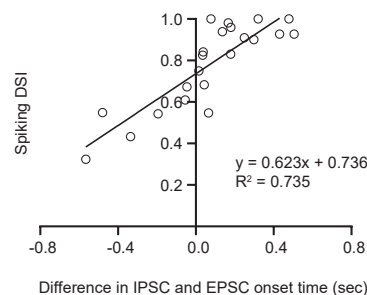

Supplement: supp [file elife-68181-supp-v1.zip]
