# Supplementary material for: Spatially displaced excitation contributes to the encoding of interrupted motion by a retinal direction-selective circuit
Source: eLife. 2021 Jun 7;10:e68181. doi: 10.7554/eLife.68181 (PMC8211448; doi:10.7554/eLife.68181)
Supplement: Figure 1—figure supplement 1—source data 1. [file elife-68181-fig1-figsupp1-data1.xlsx]

## Sheet: A
	Off spiking response, Control			Off response, Control, Polar Plot											DHBE + Gabazine, spiking response			Off response,DHBE + Gabazine, Polar Plot
	Max Region	Opp region		Global preferred direction	0	45	90	135	180	225	270	315			Max Region	Opp region		Global	0	45	90	135	180	225	270	315
	15.3	0		142.5	0	2	3	13.3	15.3	9.3	0	0			8.7	0		160.1	7	8.7	2.3	2	0.7	0	0	0
	10	1		160.1	6	10	4	1.3	0.3	1	0	0			18.3	9.3		141.7	18	9	18.3	10.7	7.3	4.3	9.3	12
	23.7	1.7		141.7	4.7	16.3	23.7	11	2.3	3.7	1.7	0			11.3	0		307	5.3	10.3	11.3	6	1	0.7	0	0
	7.7	0		202.6	0.3	0	0	1.3	7	7.7	5.3	6.7			6	0		191.6	0	0	0.3	6	0.3	0.3	0	0
	13.7	0		157.6	0	0	0	0.3	3	13.7	0.3	0			37	14		157.1	26.5	26	37	18.5	6	6.5	14	8
	24.3	0.7		338.1	4	13	24.3	20.3	6.7	0.7	0.7	0.3			29.7	1.3		165.5	0.3	1.3	5.3	19	11	29.7	13.3	5
	18.3	0.3		307	7	18.3	3	1	0.7	0.3	0.3	0			18	5.7		185.4	1.7	9	18	13.7	9	2.7	5.7	2.7
	18.7	0		191.6	0	0.3	7.7	18.7	3.3	8.3	0.3	0			7.7	2.7		144.5	7.3	7.7	7	2.3	2.7	2.7	0.7	2.3
	17.7	0		157.1	0.7	9	16.3	17.7	9	8	0	0			27.7	4.7		131.6	6.7	19	17	27.7	14.7	8	2.7	4.7
	8	1		165.5	5.7	5	0	8	0	0.3	6	1			6	1.7		140.8	6	4	6	5.7	4.7	4	1.7	5.3
	6.7	0		185.4	0	0	5.3	6.3	6.7	0.3	0.7	0			6.3	1.3		141.3	1.3	6	4.7	4.7	6.3	1.7	0.7	0.3
	4.3	0		144.5	3.7	2.3	4.3	2	1	0.3	0	0			17.3	4.7		168.9	5.3	17.3	10.7	14.7	7.3	4.7	3.3	2.3
	22.7	0.3		131.6	0.7	12.7	14.7	22.7	21.7	1	0.3	0.3			5	0		175	0	0	0	1	1	5	3	0
	6.7	1.3		140.8	2	2	4.3	6.7	0.3	3.7	0	1.3			10.7	0		114.3	0	0	3.3	10.7	5.7	0.3	0	0
	27.7	8.7		141.3	0.3	0.3	18.7	27.7	8.3	1.3	0	8.7
	23	0.3		168.9	0	5.7	23	13	4.3	0	0.3	0		mean	14.9786	3.24286
	5	0		175	0	0	0	4.5	5	4.5	0.5	1		std error	2.72292	1.11309
	16.3	1.7		114.3	0	0.7	4.7	16.3	11.3	0.7	0.7	1.7
	5.7	0		156	0	0	1	5.7	1.3	1	0	0
Mean	14.5	0.894737
std error	1.74668	0.454701

## Sheet: B
	On Spiking RSI				Off Spiking RSI
	Control	DHBE + Gabazine			Control	DHBE + Gabazine
	1	0.478			1	1
	0.793	0.954			0.818	0.325
	0.973	0.971			0.868	1
	0.814	0.867			1	1
	0.971	0.691			1	0.451
	0.75	0.944			0.947	0.914
	0.626	0.528			0.964	0.521
	1	0.965			1	0.484
	0.652	0.836			1	0.711
	1	0.932			0.778	0.565
	0.891	1			1	0.652
	1	0.225			1	0.576
	0.845	0.457			0.971	1
	1	1			0.667	1
	1	1			0.523
	0.896	0.865			0.971
	0.961	1			1
	0.696	0.7			0.815
	1				1
	0.75
	0.471
	1
	0.734
	0.52
	0.883

## Sheet: C
		On response, Control Amplitude, Polar Plot										On response, DHBE + Gabazine Amplitude, Polar Plot
		Global Preferred direction	0	45	90	135	180	225	270	315		Global Preferred direction	0	45	90	135	180	225	270	315
		98.5	168.4	260.4	268.4	146.3	67.6	72.5	49.8	95.9		177.8	51.5	281.6	589.5	159.7	47.6	37	28.7	36.8
		175.3	164.2	161.6	162.4	257	345	170.3	143.7	145.2		175.3	37.3	112.4	90.6	130.5	131.8	59.4	38.5	44.2
		165.2	82.8	112.8	230.2	321.3	190.7	74.6	64.3	64.2		165.2	29.5	96.7	376.1	466.9	220.2	64.7	18.8	46.7
		138.7	123.9	149.4	223.9	176	147.1	150.8	101.7	92.2		138.7	50.7	48.3	254.7	139.4	46.3	38.3	28.3	24.9
		177.4	345.5	443.9	340.6	156.4	145.1	172.3	234.9	254.7		158.8	46.1	84.1	98.3	115.8	113.3	256.2	151.2	43.1
		158.8	42	46.2	72.3	144.7	153.1	140.8	59.9	46.5		160.7	72.8	105.1	231.3	404.1	93.8	77.5	57	59
		157.7	33.8	43.7	94	72	118.1	87.1	53.3	32.8		115.3	53.6	61	132.1	42.6	57.2	29.8	27.2	41.2
		160.7	84.9	155.3	254.4	322.2	218.1	143	68.2	76.9		169.8	276.5	93.5	97.5	128.1	132.2	153.3	187.5	320.9
		135	142.8	183.2	300.3	408.8	314.8	258.2	105.8	131.9		154.6	30.8	27.3	33.4	109.7	306.8	128.2	115	44.5
		138.5	208.1	182.2	179.1	188.6	207.6	172.5	213.3	207.2		158.4	90.3	60.4	150.5	244	372.2	122.8	65.1	61.1
		115.3	52.5	78	114.9	104.1	51.3	33	45.8	44.2		125.9	90.2	105	86	181.6	295	208.1	64.6	86.6
		193.5	94.9	86.9	130.6	158.1	201.7	122.1	110.8	96.6		118.3	28.4	30.4	31.1	28.8	30.2	118.4	478.4	209.8
		191	111.7	101.6	109.8	180.4	253.3	262.7	192.5	134.1		115.9	20.5	29.4	202.6	439.3	327.5	51.2	20.6	18.9
		138.9	136.5	161.5	130.6	169.2	129.7	152.9	174.3	145.5		162.7	31.6	84.5	200.7	260.2	175.8	161	96.8	30.4
												140.5	51.4	57.3	69.6	414.4	399.9	330	154.7	62.8
												160.2	55.7	83.1	55.2	53.4	137.5	210.8	255.8	222.2
												180.3	202.3	300.5	446.4	512.2	272.9	160.8	150.5	138.6
												148.6	131.7	86.2	126.4	450.8	605.1	766.5	668.7	277.6

## Sheet: D
	On amplitude RSI				On charge transfer RSI
	Control	DHBE + Gabazine			Control	DHBE + Gabazine
	0.687	0.907			0.991	0.939
	0.36	0.781			0.469	0.868
	0.355	0.559			0.087	0.467
	0.667	0.508			0.162	0.476
	0.375	0.818			0.45	0.887
	0.441	0.748			0.565	0.58
	0.569	0.8			0.58	0.688
	0.555	0.461			0.515	0.738
	0.615	0.506			0.668	0.352
	0.512	0.745			0.507	0.595
	0.087	0.659			0.353	0.673
	0.43	0.728			0.599	0.615
	0.36	0.697			0.284	0.404
	0.679	0.429			0.766	0.387
	0.442	0.817			0.266	0.763
	0.144	0.609			0.415	0.395
		0.532				0.364
		0.878				0.881
		0.918				0.892
		0.791				0.861
		0.737				0.59
		0.645				0.813
		0.574				0.586
		0.798				0.731

## Sheet: E
	Latency			Rise time			Decay Time
	Control	DHBE + Gabazine		Control	DHBE + Gabazine		Control	DHBE + Gabazine
	57.1	46.3		57	28.6		321.5	68.6
	28.9	41		53.2	28.4		282.6	36.4
	34	12.9		55.2	27.1		253.4	37.1
	43.5	38.2		47	33.1		220	23.9
	34.7	39.2		48	29.2		166.4	31.6
	16.8	38.8		61.1	29.5		459.5	43.5
	50.2	82.2		44.3	33.2		462	30.9
	46.3	32.1		50.3	37.7		152	73.4
	52.1	67.3		129.2	29.3		261.7	34.6
	32.5	52.2		32.7	40.2		179.9	36.3
	45.4	29.7		116.1	30.9		462.2	54.8
	47.9	47.2		52.1	29.4		192.3	22.2
	33.4	33.8		44.8	38.8		531.7	29.9
	38.8	39.6		34.7	38.8		227.8	32.6
	41.2	41.4		56.6	33.8		264.1	28.2
	51.3	34.7		42.7	31.3		183.3	26.4
		59			29.6			42.3
		52.7			30.8			24.9
		49			25.2			26.1
		78.1			41.1			26.6
		70.9			25.7			66.7
		53.5			30.4			26.3
		45.9			33.7			24.7
		54.9			21.7			27.8
Mean	40.9	47.5		57.8	31.6		288.8	36.5
std error	2.6	3.2		6.6	1		30.7	3

## Sheet: F
	Control	Off Amplitude		Off response, Control Amplitude, Polar Plot										Control	Off Charge transfer			Off response, Control charge transfer, Polar Plot										DHBE + Gabazine	Off Amplitude		Off response, DHBE + Gabazine Amplitude, Polar Plot										DHBE + Gabazine	Off Charge transfer			Off response, DHBE + Gabazine Charge transfer, Polar Plot
	Max region	Opp Region		Global Preferred direction	0	45	90	135	180	225	270	315		Max region	Opp Region			Global Preferred direction	0	45	90	135	180	225	270	315		Max region	Opp Region		Global Preferred direction	0	45	90	135	180	225	270	315		Max region	Opp Region			Global Preferred direction	0	45	90	135
	143.7	24.9		78.2	34.2	103.9	143.7	63.8	36.2	24.4	24.9	40.5		41.4	0.8			78.2	0	25.9	41.4	10.4	3.3	0.3	0.8	4.4		723.4	86.5		188.1	90.4	225.1	723.4	257.4	71.7	115.4	86.5	101.3		97.1	6			188.1	16.5	36.8	97.1	37.9
	567.7	548.1		117.6	319.9	567.7	447.2	374.8	362.1	548.1	400	346.3		186.9	86.3			117.6	99.4	186.9	100.2	88.2	73.9	86.3	76.9	96.4		170.4	70.4		178.6	106.9	91.4	159.4	204.9	258	182.8	115.8	122.3		13.2	6.5			178.6	3.5	5.3	8.8	11
	218.9	185.5		178.6	178.8	200	208.8	218.9	180	184.1	165.1	185.5		39	34.8			178.6	34.8	38.3	39	32.9	39	29.1	34.9	31.5		258	106.9		188.7	101.3	131.2	390.1	378.5	234.3	111.1	38.6	49.2		14	3.5			188.7	4.9	6.2	19.2	17.8
	275.3	67		188.7	81.1	123.9	249.9	275.3	191.7	99.3	49.7	67		37.6	7.7			188.7	11.7	17.1	37.6	36.9	22.2	13.2	7.7	4.9		187.9	92.4		157.5	23.8	22.8	93.5	140.1	33.8	21.3	23.6	22.1		22.3	7.2			157.5	4.1	1.3	6.7	14
	126.1	32.2		156.9	34.5	41.7	84.2	126.1	115.5	51.4	61.5	32.2		19.8	1			156.9	1	1.8	13.1	16.2	19.8	6.2	6.5	2.8		390.1	38.6		168	24.1	29	34	65.7	38.7	45.8	37	25		19.2	2.2			168	1.1	1.1	2.6	5
	321.6	115.3		150.6	296.3	321.6	191.8	84	140.6	115.3	192.5	200.3		95.9	27.9			150.6	88	95.9	39.3	14.8	19.8	27.9	46.1	68		116.7	53.2		149.9	65.5	283.9	682	569.1	188.1	120.2	91.2	93.3		19.7	3			149.9	10.1	34.9	91.8	83.4
	123.7	54.1		147.2	54.1	49.5	45.3	77.3	123.7	31.7	23.2	35.1		36.6	11.3			147.2	11.3	7.4	11	17.9	36.6	4.8	4	6.1		140.1	22.1		156.9	50	64	160.1	56.5	41.9	52	22.5	24.8		14	1.1			156.9	9.4	13.4	18.8	11
	295.8	109.8		149.9	111.9	234	295.8	254.2	228.9	166.7	109.8	81.4		90.4	12.7			149.9	11.3	47.1	90.4	76	44.1	33.2	12.7	5.8		154.4	36.1		173.8	408.6	294	292.6	274	321.7	226.1	238.1	434.6		14.4	5.1			173.8	26.1	17.1	14	18.6
	255.8	101.9		135	115.7	103.1	196	255.8	222.8	129.4	116.7	101.9		82.7	31.6			135	31.6	29.1	71.1	79.5	82.7	43	29.4	26		65.7	25		159.2	29.9	25	30.7	44.3	94	89.7	47.7	32.7		5	0.1			159.2	0.6	0.5	0.5	1.6
	106.4	40.9		156.9	52.2	59.3	106.4	102.7	73.1	57.6	40.9	44		21.2	5.5			156.9	5.6	15.1	18.2	21.2	13.3	12.5	4.4	5.5		682	91.2		159.2	37.4	40	187.1	218.8	228.7	111.4	44.7	34.4		91.8	7.8			159.2	0.4	1.1	8.6	14.9
	137.3	83.1		135	75	73.1	111	137.3	113.8	95.3	113.6	83.1		37.5	25.1			135	17.7	13.8	25.5	37.5	35	32.2	31.3	25.1		160.1	22.5		169.5	22.4	185.8	371.4	449.3	283.7	27	18.4	18.9		18.8	7.3			169.5	1	17.5	76.1	63.4
	212.7	69.8		135	84.2	110.1	212.7	165	80.4	105.9	69.8	54.3		56.7	5.3			135	0.9	15.4	56.7	52.6	29	19.9	5.3	2		424.9	87.9		198.4	84.9	86.6	118.5	421	491.3	262.7	244.5	83.3		44.5	12.1			198.4	6.3	0.6	3.9	26.8
	221.7	79		119.8	142.5	122	104.8	79	90	96.6	131.3	221.7		37.2	25.8			119.8	35.9	22.1	26.7	25.8	27.1	23.6	27	37.2		287.7	89.2		168	124	182.5	491	520.7	312.4	121.2	88.2	102.3		43.2	9.4			168	13.1	20.4	50.3	55.9
	98.3	57.8		126.7	74.4	45.6	57.8	61.1	59	76.2	98.3	52.8		13.8	10.5			126.7	5	4.6	13.8	8.1	5.4	5.5	10.5	4.7		434.6	274		140	193.8	154.3	173.7	298.6	714.7	843.6	647.7	252.4		26.1	19.8			140	20.4	16.4	19.2	24.2
																												94	29.9												5.4	0.5
Mean	221.785	112.101											Mean	56.9	20.5													228.7	37.4												16.6	0.4
std error	33.1296	35.2925											std error	12.1	5.9													449.3	18.9												76.1	0.3
																												491.3	84.9												37.9	6.3
																												520.7	102.3												55.9	11.9
																												843.6	154.3												59.5	16.4
																											Mean	341.2	76.2											Mean	34.7	6.3
																											std error	50.5	13.3											std error	6.3	1.2
[truncated: 4 more columns]

## Sheet: G
	Off amplitude RSI				Off charge transfer RSI
	Control	DHBE + Gabazine			Control	DHBE + Gabazine
	0.704	0.786			0.96	0.883
	0.018	0.416			0.368	0.341
	0.083	0.414			0.057	0.598
	0.608	0.341			0.662	0.514
	0.593	0.82			0.902	0.778
	0.472	0.374			0.549	0.736
	0.568	0.728			0.311	0.854
	0.392	0.621			0.527	0.476
	0.458	0.449			0.754	0.976
	0.43	0.764			0.447	0.843
	0.445	0.754			0.585	0.438
	0.246	0.657			0.198	0.573
	0.506	0.527			0.83	0.641
	0.475	0.227			0.181	0.138
	0.26	0.517			0.133	0.842
		0.719				0.956
		0.154				0.336
		0.736				0.608
		0.919				0.991
		0.705				0.715
		0.672				0.648
		0.691				0.569

## Sheet: H
	ON spikes
	Distance from Soma Preferred Side boundary	Distance from Soma Null Side Boundary
	169.7	0
	84.9	0
	169.7	169.7
	169.7	0
	240	60
	180	0
	254.6	0
	180	0
	169.7	84.9
	169.7	169.7
	120	0
	169.7	84.9
	169.7	84.9
Mean	172.9	50.3
std error	11.8	17.9
