# Supplementary material for: Spatially displaced excitation contributes to the encoding of interrupted motion by a retinal direction-selective circuit
Source: eLife. 2021 Jun 7;10:e68181. doi: 10.7554/eLife.68181 (PMC8211448; doi:10.7554/eLife.68181)
Supplement: Figure 1—source data 1. [file elife-68181-fig1-data1.xlsx]

## Sheet: 1B
	On spikes to regional spot
degrees from maximum response	-135	-90	-45	0	45	90	135	180
	0	0	8	9	2.7	0.7	0	0
	2	0.7	8.3	8.7	6.3	5.3	2	1
	0.7	6.3	13.7	24	24	16.7	2	0.3
	1.3	2.7	6.7	14	13	4.3	0.7	1.3
	0.7	7.7	19	22.3	19.7	12.7	0.7	0.3
	1	1	3.3	14	5	2.3	4.7	2
	2.3	0.7	16.3	24.7	17.3	5	0.3	5.7
	0	0.7	5	10	10	2	0.7	0
	9.3	7	10.7	12.7	10	9.7	3.7	2.7
	0	2.3	6	10.7	6.7	2	0	0
	2	13	17.3	23	19.7	9.7	1	1.3
	0	2	8.3	18	10.7	6.7	1	0
	1.3	0	0.3	8	4.3	0	0.3	0.7
	0	0.7	9	13.3	3.7	3.3	0	0
	0	0.7	4.3	17.7	1.7	0.3	0	0
	1.3	2.7	4	6	0.3	0.3	3	0.3
	0.3	0.5	2	12.5	8.8	5.5	1	0.3
	0	0.7	4.3	9.3	5.3	1.7	5.3	1.7
	0	0.5	9.3	9.8	10	0.8	0.8	0
	2.7	2.3	6.7	9.3	2.7	6.7	2	1.3
	1	5.7	14.3	16.7	8.7	6.7	7	6
	3.7	3	7	9.3	7.7	0	0	0
	1.3	2.7	5	8.7	2.7	1.3	1	1.3
	1.3	1.3	3	12.7	9	4	3	4
	0.3	0.3	1	5.3	2.3	1	0.3	0.3
Mean	1.3	2.6	7.7	13.2	8.5	4.3	1.6	1.2
std error	0.4	0.6	1	1.1	1.2	0.9	0.4	0.3

## Sheet: 1C
	Control			On spike response, Control, Polar plot												Dhbe + Gabazine			On spike response, DHBE + Gabazine, Polar Plot
	Max Region	Opp region		Global preferred direction	0	45	90	135	180	225	270	315				Max region	Opp region		Global preferred direction	0	45	90	135	180	225	270	315
	9	0		53.3	0.7	2.7	9	8	0	0	0	0				28.3	10		53.3	6.7	11.3	22.7	28.3	25.3	14	7.3	10
	8.7	1		132.5	1	2	5.3	6.3	8.7	8.3	0.7	2				14	0.3		160.9	12.3	14	7.7	3	1	0.3	0	0
	23.7	0.3		160.9	2	16.7	23.7	23	13.7	6.3	0.3	0.7				22.3	0.3		154.7	11	22.3	17	3.7	2	0.3	0.3	3
	13	1.3		154.7	0.7	4.3	13	13	6.7	2.7	1.3	1.3				14	1		8	5.3	14	11	3.3	1.3	1	1.8	1.5
	22.3	0.3		202.9	0.7	0.3	0.7	12.7	19.7	22.3	19	7.7				3.7	0.7		179.4	0.7	0.3	1.7	2.7	3.7	2	0.7	0
	14	2		191.8	1	2	4.7	2.3	5	14	3.3	1				34.7	1		148	9	13.7	28	34.7	21	3	0.3	1
	24.7	5.7		333.8	17.3	24.7	16.3	0.7	2.3	5.7	0.3	5				20.3	6.3		190.1	1	6.3	2.3	5.8	8.5	20.3	7.8	1.5
	10	0		161.6	0	0.7	2	10	10	5	0.7	0				18.3	0.3		154.2	2.5	6.8	14	8	10.3	3.5	1.3	1.3
	12.7	2.7		318.1	10.7	7	9.3	2.7	3.7	9.7	10	12.7				14	1.3		152.7	13.5	14.3	4.8	1.8	0.3	0.5	0	4
	10.7	0		132.6	0	2	6.7	10.7	6	2.3	0	0				14.3	0.5		127	0.8	1.4	11.4	15.2	5	0.4	0.8	0
	23	1.3		175.3	1.3	1	9.7	19.7	23	17.3	13	2				15.2	0		154.8	15.4	10	12	19.6	12.6	11.4	8	12.4
	18	0		338.6	18	8.3	2	0	0	1	6.7	10.7				19.6	12.4		168.3	15.3	20.7	33.3	36.7	24.7	18.3	17.7	13.7
	8	0.7		8	4.3	8	0.3	0	1.3	0.7	0.3	0				36.7	13.7		177.8	2.7	11.3	11.7	10.3	8.7	0	0	0.3
	13.3	0		179.4	0	0	3.3	3.7	13.3	9	0.7	0				11.7	0		169.8	0	0	0	2	4	7.3	1	0.7
	17.7	0		148	0	0.3	1.7	17.7	4.3	0.7	0	0				7.3	0
	6	0.3		190.1	2.7	1.3	0.3	3	0.3	0.3	6	4				18.3	1.3
	12.5	0.3		154.2	0.3	1	5.5	8.8	12.5	2	0.5	0.3				5.3	0
	9.3	1.7		152.7	5.3	1.7	5.3	9.3	4.3	0.7	0	1.7				5.7	1
	9.8	0		127	0.8	0.8	9	9.8	9.3	0.5	0	0
	9.3	1.3		154.8	6.7	2.7	9.3	6.7	2.3	2.7	1.3	2			Mean	16.9	2.8
	16.7	6		168.3	7	6.7	8.7	16.7	14.3	5.7	1	6			Std Error	2.2	1.1
	9.3	0		177.8	0	0	7.7	9.3	7	3	3.7	0
	8.7	1.3		162.3	1.3	1	1.3	2.7	8.7	5	2.7	1.3
	12.7	4		175.9	4	3	4	9	12.7	3	1.3	1.3
	5.3	0.3		138.7	0.3	1	2.3	5.3	1	0.3	0.3	0.3
Mean	13.1	1.2
Std Error	1.1	0.3

## Sheet: 1D
	Control	Amplitude		Control	Charge transfer			On Charge transfer, Control, Polar plot										DHBE + Gabazine	amplitude		DHBE + Gabazine	Charge transfer		On Charge transfer, DHBE + Gabazine, Polar plot
	Max Region	Opp region		Max Region	Opp region			Global preferred direction	0	45	90	135	180	225	270	315		Max region	Opp region		Max region	Opp region		Global preferred direction	0	45	90	135	180	225	270	315
	268.4	49.8		38.9	0.2			98.5	8.9	33	38.9	15.1	3.5	2.6	0.2	3.4		589.5	28.7		67.2	2.1		177.8	13.4	35.5	67.2	24.6	14.1	7.3	2.1	9.4
	345	164.2		65.4	54.9			175.3	54.9	56	41.2	44.5	65.3	37	30.8	41		356.9	43.9		44.8	3.2		175.3	3	2.3	2.5	7.2	8.4	3.7	2.9	0.4
	321.3	64.2		37.3	26.9			165.2	26.9	26.6	35.1	37.1	37.3	29.5	15.9	31.4		131.8	37.3		8.4	3		165.2	4.8	11.3	38.3	43.5	22.9	8.7	3.9	2.6
	223.9	101.7		26.4	10			138.7	12.5	14.5	26.4	20.5	19	18.1	10	13.9		186.9	60.9		34	12.1		138.7	4.6	1.7	14.9	9.2	0.8	0.1	2.8	2.8
	443.9	172.3		130.5	36.2			177.4	130.5	122.7	86.7	40	36.2	48.1	70.7	109.9		466.9	46.7		43.5	2.6		158.8	5.8	10.1	12	9.5	11.9	21.1	14.3	6.9
	153.1	42		43.2	11.5			158.8	11.5	13.9	23.1	34.2	43.2	42.7	18.3	13.8		464.6	67.1		80.7	21.5		160.7	18.8	27.6	45	50.2	24.9	18.3	7.7	12.7
	118.1	33.8		29.6	9.5			157.7	9.5	12.6	15.5	17.7	29.6	23.1	13.7	8.7		254.7	28.3		14.9	2.8		115.3	3.2	6.8	9.5	6.2	4.7	-0.6	1.8	2.9
	322.2	76.9		38.2	7.6			160.7	9.3	22.6	35.7	38.2	27.6	17.6	7.8	7.6		106.3	39.2		6.4	1		169.8	23.5	9.4	8.9	10.8	11.2	6.9	9.4	24.5
	408.8	131.9		158.3	51.8			135	75.7	62.5	157.7	158.3	125.7	115.8	37	51.8		256.2	84.1		21.2	10.1		154.6	4.8	1.8	4.4	16.1	35.4	22.6	12.8	9.2
	213.3	179.1		122.9	58.8			138.5	116.6	87.4	58.8	87.4	77.4	64.3	122.9	100.8		404.1	59		50.2	12.7		158.4	27.1	15.5	25.5	51.5	62.4	29	17.3	15
	114.9	45.8		25	6.3			115.3	4.9	15.3	22.4	25	11	6.2	6	6.3		132.1	27.2		9.5	1.9		125.9	16.9	20	16	26.3	36.2	18.4	8.2	11.7
	201.7	94.9		62.7	35			193.5	35	28.7	45.6	54.6	62.7	40.3	33.9	23.3		382.1	60.1		40.4	9.6		118.3	5.7	4.7	5.1	5.6	5.2	16.1	80	19.1
	299.2	57.2		69	9.1			191	43.6	43.2	43.7	52.8	75.3	68.6	52.1	43.4		764.6	136.4		108.1	45.9		115.9	3.2	4.3	17.9	49	33	5.3	3.3	2.8
	262.7	101.7		75.3	43.6			138.9	7.9	11.1	32.9	38.9	21.1	29.6	32.2	16.1		320.9	128.1		24.5	10.8		162.7	4.2	6.8	21.8	32.5	26.9	20.1	8.6	2.4
	174.3	130.6		38.9	16.1													306.8	30.8		35.4	4.8		140.5	9.1	11.6	13.6	40.6	32.3	36	19	10.4
																		372.2	90.3		62.5	27.1		160.2	2.3	2.2	0.4	1.2	17.8	21	13	6.4
Mean	258.1	96.4		64.1	25.2													295	90.2		36.3	16.9		180.3	21.9	44.1	61.5	67.8	38.1	22.5	23.7	17.7
Std Error	24.9	12.8		10.7	5.2													478.4	31.1		80	5.1		148.6	14.6	9.5	12.5	36.6	43.4	61.1	46.7	22.1
																		439.3	18.9		49	2.8
																		260.2	30.4		32.5	2.4
																		414.4	62.8		40.6	10.5
																		255.8	55.2		21	2.2
																		512.2	138.6		67.8	17.7
																		766.5	86.2		61.1	9.5
																	Mean	371.6	61.7		43.3	9.9
																	std error	35.6	7.2		5.2	2.1
