# Supplementary material for: Spatially displaced excitation contributes to the encoding of interrupted motion by a retinal direction-selective circuit
Source: eLife. 2021 Jun 7;10:e68181. doi: 10.7554/eLife.68181 (PMC8211448; doi:10.7554/eLife.68181)
Supplement: Figure 2—figure supplement 1—source data 1. [file elife-68181-fig2-figsupp1-data1.xlsx]

## Sheet: A
	On Dendritic Length Quadrants				Dendritic Branch Number Quadrants
	Pref Side	Null Side			Pref Side	Null Side
	528.6	397.2			23	21
	504.2	1158.9			29	69
	991.8	561.1			62	29
	771.5	194.8			42	8
	847.5	200.6			45	12
	782.8	103.3			46	8
	441.5	768.7			43	41
	363.5	966.5			32	56
	278.1	517.5			17	32
	1374.5	488.2			115	37
	516.2	85			30	9
	818.5	1579.4			63	118
	987.9	770.5			48	52
	878.2	523.6			38	26
	1226.8	283.4			58	10
	338.5	1115.3			15	81
	399.1	1176.8			30	84
	804.9	189			55	6
	888.3	1043.8			37	54
	1354	570.7			65	24
	1081	562.7			66	42
	723.1	799			29	37
	398.8	750.7			33	47
	505.6	817.1			21	51
	1416.1	480.1			60	31
	582.4	796.6			51	65
Mean	761.7	650			44.3	40.4
std error	66.1	73.7			4.1	5.4

## Sheet: B
	Off dendritic length				Dendritic length in microns, used for vector sum plot
	Preferred side	Null side		degrees from preferred direction	-22.5 to + 22.5 deg	+22.5 to +67.5 deg	+67.5 to +112.5 deg	+112.5 to +157.5 deg	+157.5 to -157.5deg	-67.5 to -157.5deg	-67.5 to -112.5 deg	-22.5 to -67.5 deg
	280.3	243.1		8 different compartments.	280.3	419.8	225.3	213.2	243.1	235	111.7	68.9
	328.3	274		First compartment corresponds with the preferred side	328.3	210.8	535.8	683.7	274	62.2	152.1	296.1
	94	14.4			94	674.3	633.5	221.8	14.4	103.4	10.9	42.3
	365.4	111.5			365.4	649.6	186.2	43.7	111.5	432.8	260.7	224.2
	384.3	95.8			384.3	1413.6	952.1	263.1	95.8	0	0.8	51.1
	312.6	91.8			312.6	396.7	531.3	304.4	91.8	118.4	88.8	306.4
	113.7	239.5			113.7	109.2	208.2	359.3	239.5	86.6	0	18.6
	118.7	559.8			118.7	475.8	376	424.3	559.8	302.6	121	63.5
	128	256.6			128	168.1	191.8	310.7	256.6	364.5	188.5	68.5
	234.5	0			234.5	0	0	0	0	0	108.5	324.4
	425.8	177.7			425.8	430.3	383.2	153.3	177.7	142.6	172.6	205
	368.5	558.5			368.5	399.4	168	231.4	558.5	158.3	8	45.3
	92.6	105.9			92.6	216.2	242	100.4	105.9	3.8	0	55.2
	701.9	388.3			701.9	279	110.6	255.1	388.3	240.7	255.4	360.2
	533.3	183.6			533.3	414.8	78.9	201.9	183.6	281.4	128.4	230.3
	16.5	324.8			16.5	306.7	293.2	436.8	324.8	113.8	21.3	0
	26.6	249			26.6	30.5	69.2	128.9	249	150.5	100.5	16.5
	91.9	162.7			91.9	456.1	706.1	468	162.7	64.4	7.2	0
	126.7	35.7			126.7	58.1	29	0	35.7	45.9	74.5	28.2
	0	225.2			0	0	0	31.7	225.2	241.5	315.8	260
	251.8	223.3			251.8	54.7	0	115.3	223.3	117.8	22.6	119.1
	100.1	172.9			100.1	99.4	100.2	90.2	172.9	131.1	80.7	132
	36.8	38			36.8	416.7	544.4	220.7	38	0	0	4.4
	106.4	213.3			106.4	42.4	87.2	124.4	213.3	227.8	373.6	227
mean	218.3	206
std error	36.7	29.9

## Sheet: C
	Off branch points				Dendritic length in microns, used for vector sum plot
	Preferred side	Null side		degrees from preferred direction	-22.5 to + 22.5 deg	+22.5 to +67.5 deg	+67.5 to +112.5 deg	+112.5 to +157.5 deg	+157.5 to -157.5deg	-67.5 to -157.5deg	-67.5 to -112.5 deg	-22.5 to -67.5 deg
	23	25		8 different compartments.	23	23	23	12	25	18	6	5
	27	24		First compartment corresponds with the preferred side	27	16	46	63	24	5	10	24
	4	2			4	45	50	19	2	8	1	2
	26	12			26	46	9	4	12	21	23	17
	39	5			39	139	72	17	5	0	0	4
	26	7			26	23	44	26	7	11	6	23
	8	26			8	13	21	22	26	8	0	1
	8	39			8	39	32	41	39	28	9	4
	8	20			8	13	16	27	20	34	15	8
	12	0			12	0	0	0	0	0	10	17
	27	16			27	37	22	15	16	6	12	14
	37	40			37	36	10	24	40	12	0	2
	6	6			6	18	12	7	6	0	0	1
	54	27			54	29	10	21	27	17	29	37
	32	14			32	19	5	9	14	20	10	17
	1	18			1	14	25	33	18	4	0	0
	2	19			2	2	7	8	19	19	9	0
	6	12			6	45	75	54	12	5	0	0
	4	6			4	4	3	0	6	3	3	0
	0	8			0	0	0	1	8	7	15	13
	17	16			17	2	0	10	16	8	0	12
	9	10			9	8	6	10	10	12	4	8
	3	0			3	26	38	14	0	0	0	0
	8	9			8	1	3	12	9	13	24	21
Mean	16.125	15.0417
std error	2.95394	2.24131

## Sheet: D
	Off dendritic length				Vector sum plot: Off dendritic length aligned to the EPSC displacement										Off branch points
	Max region	Opp region		Max Region of EPSC response	Region 1	Region 2	Region 3	Region 4	Region 5	Region 6	Region 7	Region 8			Max region	Opp region
	223.3	105.8		4	87.7	280	422	223.3	207.3	260	205.7	105.8			24	5
	547.4	0		4	71.2	148.4	777.9	547.4	121.4	49.9	75.6	0			44	0
	604.9	243.5		3	221.9	242.5	604.9	406.4	75.6	99.5	243.5	372			44	14
	1450.4	0		4	4.6	111.8	683.2	1450.4	662.6	223.7	22	0			136	0
	505.4	123.2		4	170.5	282.3	338.2	505.4	453.5	198.2	72.5	123.2			35	10
	391.5	477.2		7	60.7	106.7	477.2	352.2	389.2	529.8	391.5	132.3			40	38
	192.1	327.7		3	51.4	107.7	192.1	150.5	333.3	264.5	327.7	249.3			15	28
	333.7	0		2	235.6	333.7	78	0	0	0	0	16.6			16	0
	73.2	139.3		2	3.9	73.2	163	328.7	89.4	139.3	17.7	0			3	10
	597.1	288.5		3	290.3	517.3	597.1	124.3	186.5	363.4	288.5	218.5			52	20
	312.6	220		3	306.4	542.2	312.6	93.9	236.2	183.3	220	154.3			14	15
	52.4	292.9		3	16.8	0	52.4	311.5	285.7	455.2	292.9	97.2			2	16
	313.5	95.3		3	0	60.9	313.5	700.7	576.1	190.4	95.3	19.5			27	7
	302.3	3.9		2	309.1	302.3	88.3	0	0	3.9	128.8	241.8			13	0
	44.1	108.2		3	116.3	254.4	44.1	0	128.5	223.6	108.2	26.6			1	6
	297.5	11.3		3	0	15.7	297.5	587.7	272.8	75.9	11.3	0			21	0
	431.4	100.9		1	431.4	149.1	98	38.7	100.9	118.3	229.3	233.3			31	4
mean	392.518	149.276												mean	30.4706	10.1765
std error	78.7171	33.7537												std error	7.59262	2.62235

## Sheet: E
	Off
	Charge transfer RSI	dendritic length rsi
	0.883	0.357
	0.778	1
	0.854	0.426
	0.843	1
	0.438	0.608
	0.138	-0.099
	0.842	1
	0.956	-0.311
	0.331	0.348
	0.991	0.534
	0.715	0.975
	0.388	-0.421
	0.648	0.927
	0.569	0.621
