# Supplementary material for: Spatially displaced excitation contributes to the encoding of interrupted motion by a retinal direction-selective circuit
Source: eLife. 2021 Jun 7;10:e68181. doi: 10.7554/eLife.68181 (PMC8211448; doi:10.7554/eLife.68181)
Supplement: Figure 2—source data 1. [file elife-68181-fig2-data1.xlsx]

## Sheet: 2C
	Dendritic length				On dendritic length in microns, used for vector sum plot
	Preferred side	Null Side		degrees from preferred direction	-22.5 to + 22.5 deg	+22.5 to +67.5 deg	+67.5 to +112.5 deg	+112.5 to +157.5 deg	+157.5 to -157.5 deg	-67.5 to -157.5deg	-67.5 to -112.5 deg	-22.5 to -67.5 deg
	302.099	215.948		8 different compartments.	302.099	154.645	122.913	133.628	215.948	109.427	141.724	204.735
	270.254	567.408		First compartment corresponds with the preferred side	270.254	298.265	348.503	492.519	567.408	439.797	129.381	126.529
	375.035	229.924			375.035	838.925	673.889	210.266	229.924	245.141	67.1373	250.166
	453.23	145.104			453.23	457.634	108.447	30.7174	145.104	37.4774	244.366	189.249
	288.789	130.37			288.789	1237.15	663.829	365.707	130.37	0	0	0
	408.744	68.4406			408.744	460.397	209.815	82.843	68.4406	0	6.22959	181.569
	262.24	363.44			262.24	143.022	395.803	240.264	363.44	659.092	488.969	183.225
	189.993	563.348			189.993	311.784	278.938	243.218	563.348	306.131	99.4057	31.5289
	175.827	274.382			175.827	249.964	321.581	298.209	274.382	258.054	47.2445	3.96333
	784.9	265.958			784.9	228.044	102.252	121.776	265.958	409.489	494.371	702.3
	202.209	70.0198			202.209	259.175	256.544	43.0103	70.0198	43.549	152.187	264.264
	370.915	1095.04			370.915	647.852	250.375	548.896	1095.04	104.776	0	38.4004
	569.565	556.502			569.565	425.396	371.573	232.328	556.502	179.53	198.353	314.123
	501.06	352.694			501.06	16.7301	164.479	285.951	352.694	0	249.271	733.972
	481.008	161.086			481.008	348.525	264.562	121.176	161.086	232.867	595.144	873.229
	95.551	548.603			95.551	640.885	679.479	347.819	548.603	565.98	318.488	269.609
	243.259	668.199			243.259	248.864	175.882	308.263	668.199	530.021	326.131	114.803
	501.406	43.7846			501.406	297.526	217.907	193.848	43.7846	79.1653	21.0258	260.762
	512.256	492.971			512.256	385.881	327.691	687.254	492.971	476.701	157.905	306.241
	606.565	253.267			606.565	711.606	293.987	260.656	253.267	450.635	443.906	640.874
	629.629	226.635			629.629	113.065	6.55017	109.438	226.635	500.463	726.728	755.331
	430.762	457.54			430.762	234.528	219.483	481.439	457.54	208.346	281.485	314.503
	150.681	385.898			150.681	292.837	95.8382	200.651	385.898	360.309	416.098	204.937
	179.105	404.97			179.105	629.575	822.129	506.221	404.97	289.75	105.036	67.5481
	650.293	215.474			650.293	1065.4	269.355	170.779	215.474	438.858	219.241	53.2631
	249.718	485.723			249.718	124.184	235.401	210.457	485.723	496.961	416.279	470.59
Mean	380.196	355.49
Std Error	35.3395	45.5822

## Sheet: 2D
	Number of branches				Number of branches, used for vector sum plot
	Preferred side	Null Side		degrees from preferred direction	-22.5 to + 22.5 deg	+22.5 to +67.5 deg	+67.5 to +112.5 deg	+112.5 to +157.5 deg	+157.5 to -157.5 deg	-67.5 to -157.5deg	-67.5 to -112.5 deg	-22.5 to -67.5 deg
	11	9		8 different compartments.	11	8	2	9	9	8	9	9
	20	28		First compartment corresponds with the preferred side	20	17	24	34	28	30	2	2
	24	10			24	48	30	9	10	12	5	15
	27	8			27	20	5	0	8	0	24	12
	10	6			10	73	30	24	6	0	0	0
	23	3			23	24	11	7	3	0	0	13
	26	18			26	7	36	17	18	34	30	15
	15	35			15	22	21	14	35	20	6	5
	8	15			8	11	20	17	15	19	1	1
	64	21			64	24	8	4	21	29	28	49
	10	8			10	19	14	2	8	3	6	18
	35	71			35	38	12	50	71	6	0	2
	27	35			27	25	26	14	35	13	10	19
	23	16			23	0	8	18	16	0	15	35
	21	6			21	19	15	5	6	10	23	34
	3	35			3	37	54	27	35	42	23	17
	21	44			21	13	15	25	44	37	27	10
	32	2			32	20	16	8	2	1	0	18
	22	22			22	16	8	31	22	22	8	15
	32	10			32	28	10	15	10	14	20	26
	38	11			38	9	0	13	11	35	36	48
	12	22			12	9	7	27	22	6	16	19
	12	26			12	24	10	11	26	22	27	12
	8	21			8	22	38	24	21	21	9	5
	32	10			32	47	11	8	10	30	14	1
	23	44			23	11	25	15	44	37	25	35
mean	22.2692	20.6154
std error	2.47359	3.13004

## Sheet: 2E
On dendritic length				Vector sum plot: On dendritic length aligned to the EPSC displacement									On branch points
Max region	Opp region		Max Region of EPSC response	Region 1	Region 2	Region 3	Region 4	Region 5	Region 6	Region 7	Region 8		Max region	Opp region
121.2	134.4		4	208.9	307.4	152.7	121.2	126.3	194.6	137.9	134.4		2	9
510.4	99.4		5	99.4	201.5	373.6	293.8	510.4	474.9	587.3	130.7		36	1
595.7	82		5	82	526.2	759.3	944.1	595.7	534.9	207.2	108.4		44	5
658.4	372		2	436.5	658.4	489.4	411.3	355.7	372	190.8	177.5		36	18
597.6	263.1		3	166.2	413.6	597.6	816.3	304.5	256	263.1	69.2		36	13
932.3	208.9		3	297.2	680.3	932.3	587	716.2	371.1	208.9	191		49	13
453.9	41		4	222.2	183.5	481.1	453.9	78	32.6	169.8	41		18	2
394.7	308.9		4	408.9	645.1	385.1	394.7	248.1	132	182.7	308.9		30	28
924	0		3	0	55.3	924	1025.6	489.4	191.5	0	0		50	0
556	5.7		4	0	68.6	266.3	556	318.1	101.7	101.6	5.7		35	1
229.6	659.6		3	241.3	188.8	229.6	356.2	220.9	490.8	659.6	346.5		19	35
506	0.5		4	31.2	280.7	188.5	506	768.1	490	48.3	0.5		43	0
23.4	269.4		3	465.8	168	23.4	0	6.6	91.4	269.4	592.3		0	16
484	235.1		7	26.8	173.2	235.1	345	193.3	459.1	484	107		28	18
781.5	200.7		2	524.8	781.5	610.6	141.9	52.2	200.7	306.1	481.6		64	10
891.2	575.7		7	0	112.7	575.7	437.1	292.8	746.9	891.2	0		58	43
523.5	361.9		2	168.9	523.5	474.5	358.8	352	361.9	411.7	185.8		27	24
724.3	265.9		2	135.7	724.3	595.4	32.4	113.5	265.9	380.4	51.9		37	20
104.5	556		2	250.6	104.5	698.6	617.2	356.3	556	547.6	332.6		4	36
652.5	216.8		8	278.1	213.9	200.5	216.8	264.2	215.1	569.7	652.5		39	12
423.3	162.1		1	423.3	504.2	254.2	197.3	162.1	211.4	448.5	695.6		14	9
421.3	110.3		3	29.2	111.4	421.3	412.9	256.6	207	110.3	64.5		32	5
519.7	354.2		3	150.9	330.2	519.7	349.7	454.8	719.4	354.2	463.6		20	12
734.3	281.4		3	444.5	619.1	734.3	479	244.4	280.3	281.4	572.6		28	10
798.1	125.2		2	677.7	798.1	555.9	83.4	8.4	125.2	264.8	543.5		47	13
240.5	329		1	240.5	490	253.7	271	329	551.6	242.2	248		16	19
270.5	138.8		2	384.6	270.5	195.4	200.3	168.5	138.8	255.9	489.1		13	13
631.1	284.5		3	66	178.8	631.1	824.9	502.9	408.5	284.5	104.6		22	21
1124.6	442.9		3	71.3	563	1124.6	285.6	180.4	208.9	442.9	200.2		49	31
375.7	242.3		1	375.7	398.9	255.8	122.9	242.3	252.3	516.1	517.1		25	23
223.5	507.9		2	135.1	223.5	559.1	532	457.7	617.5	507.9	204.9		8	35

## Sheet: 2F
	On
	Charge transfer RSI	dendritic length rsi
	0.939	-0.047
	0.15	0.697
	0.868	0.758
	0.476	0.275
	0.887	0.385
	0.58	0.631
	0.688	0.832
	0.739	0.122
	0.595	1
	0.674	0.979
	0.066	-0.484
	0.615	0.998
	0.404	-0.898
	0.387	0.339
	0.763	0.605
	0.206	0.215
	0.395	0.19
	0.363	0.458
	0.863	-0.684
	0.881	0.497
	0.735	0.455
	0.892	0.577
	0.569	0.196
	0.861	0.452
	0.59	0.729
	0.814	-0.166
	0.634	0.312
	0.586	0.374
	0.513	0.436
	0.731	0.234
	0.302	-0.383
