# Supplementary material for: Spatially displaced excitation contributes to the encoding of interrupted motion by a retinal direction-selective circuit
Source: eLife. 2021 Jun 7;10:e68181. doi: 10.7554/eLife.68181 (PMC8211448; doi:10.7554/eLife.68181)
Supplement: Figure 3—figure supplement 1—source data 1. [file elife-68181-fig3-figsupp1-data1.xlsx]

## Sheet: B
		Distance between RF CPM and dendritic COM	Angle
		18.0286	-26.0722
		10.4929	22.2418
		6.56346	2.60321
		33.1015	-44.4304
		13.3799	-3.43136
		4.39781	6.98314
		39.1955	-43.7884
		21.1226	72.6863
		12.3124	30.9063
		16.0498	1.29426
		26.7535	158.158
		19.4805	52.3439
		29.6328	-46.9222
		29.5051	-51.5413
		19.8292	61.0678
		16.2322	-6.32745

## Sheet: C
On	Distance Max	Max amp/dend len	Distance Opp	Opp amp/dend len	Distance Max + 90	Max + 90 amp/dend len	Distance Max -90	Max-90 amp/den len		Max den len	Max amp	Opp den len	Opp amp	Max + 90 len	Max + 90 amp	Max -90 len	Max-90 amp
Cell 1	44.7214	1.92999	107.703	Inf	107.703	0.501875	44.7214	0.759334		301.043	581.01	0	28.2058	73.5332	36.9045	373.292	283.453
Cell 1	28.2843	1.54961	101.98	1.00207	89.4427	0.202598	56.5685	0.570234		323.082	500.651	42.2433	42.3309	182.024	36.8777	310.045	176.798
Cell 1	20	1.08527	100	0.490437	72.111	0.432166	72.111	0.741323		304.34	330.291	68.3674	33.5299	240.147	103.783	188.592	139.808
Cell 1	28.2843	1.15203	101.98	0.30711	56.5685	0.662224	89.4427	0.594917		259.44	298.884	132.06	40.557	286.453	189.696	59.8982	35.6345
Cell 1	44.7214	1.12153	107.703	0.667568	44.7214	1.16121	107.703	4.53647		227.29	254.912	113.621	75.85	327.81	380.656	5.48742	24.8935
Cell 1	56.5685	2.03668	89.4427	9.80976	101.98	1.02599	28.2843	1.16819		275.194	560.482	5.1334	50.3574	80.9127	83.0159	331.125	386.817
Cell 1	44.7214	1.96969	82.4621	1.21606	82.4621	0.645848	44.7214	0.58791		327.019	644.127	76.9739	93.6046	205.481	132.71	242.277	142.437
Cell 1	40	1.90725	80	0.691771	63.2456	0.823933	63.2456	0.660956		280.566	535.11	169.972	117.582	306.738	252.731	165.312	109.264
Cell 1	44.7214	1.18436	82.4621	0.460953	44.7214	1.06117	82.4621	0.741317		261.267	309.433	270.345	124.616	375.191	398.141	59.743	44.2885
Cell 1	56.5685	1.91803	89.4427	0.349813	28.2843	1.37094	101.98	2.53935		188.844	362.207	278.504	97.4241	375.456	514.729	11.7217	29.7655
Cell 1	72.111	2.24068	72.111	0.639195	100	2.36625	20	1.11267		278.362	623.722	147.82	94.4861	66.965	158.456	270.885	301.406
Cell 1	63.2456	2.155	63.2456	1.21268	80	1.47047	40	0.639326		319.743	689.048	194.11	235.393	204.362	300.507	201.482	128.813
Cell 1	60	1.26144	60	0.835062	60	1.22501	60	0.728275		335.134	422.753	301.905	252.11	246.325	301.751	154.818	112.75
Cell 1	63.2456	1.09418	63.2456	0.559565	40	1.63425	80	1.01916		285.408	312.287	377.902	211.46	295.267	482.541	66.7657	68.0449
Cell 1	72.111	1.17109	72.111	0.418049	20	1.65978	100	2.65298		161.498	189.129	353.77	147.893	338.585	561.978	13.3171	35.33
Cell 1	89.4427	1.80323	56.5685	0.662224	101.98	1.90863	28.2843	1.15203		255.445	460.626	286.453	189.696	102.387	195.418	259.44	298.884
Cell 1	82.4621	2.07836	44.7214	1.16121	82.4621	2.09296	44.7214	1.12153		251.547	522.805	327.81	380.656	143.999	301.384	227.29	254.912
Cell 1	80	1.49128	40	1.10943	63.2456	1.88964	63.2456	1.30381		276.153	411.822	383.855	425.858	232.539	439.414	145.392	189.564
Cell 1	82.4621	1.50348	44.7214	0.759334	44.7214	1.92999	82.4621	1.6035		220.334	331.267	373.292	283.453	301.043	581.01	68.0603	109.135
Cell 1	89.4427	2.22099	56.5685	0.570234	28.2843	1.54961	101.98	2.82946		121.916	270.774	310.045	176.798	323.082	500.651	14.1201	39.9523
Cell 1	107.703	2.10172	44.7214	1.06117	107.703	1.44364	44.7214	1.18436		183.344	385.338	375.191	398.141	87.3589	126.115	261.267	309.433
Cell 1	101.98	1.75381	28.2843	1.37094	89.4427	1.38116	56.5685	1.91803		222.319	389.905	375.456	514.729	159.797	220.706	188.844	362.207
Cell 1	100	1.88467	20	0.941094	72.111	1.56348	72.111	2.13589		177.453	334.44	378.729	356.42	225.826	353.074	97.9561	209.224
Cell 1	101.98	2.85154	28.2843	1.16819	56.5685	2.03668	89.4427	2.7061		97.4604	277.913	331.125	386.817	275.194	560.482	45.2871	122.551
Cell 1	107.703	4.9802	44.7214	0.58791	44.7214	1.96969	107.703	12.0498		32.905	163.874	242.277	142.437	327.019	644.127	5.82633	70.2064
Cell 2	44.7214	0.522428	107.703	Inf	107.703	Inf	44.7214	0.388151		208.007	108.669	0	42.424	0	40.5037	300.992	116.83
Cell 2	28.2843	0.441384	101.98	3.21314	89.4427	10.166	56.5685	0.337403		276.949	122.241	14.1208	45.3721	5.6643	57.5831	270.459	91.2535
Cell 2	20	0.378817	100	2.50744	72.111	1.58661	72.111	0.243232		317.428	120.247	19.0576	47.7859	55.1256	87.4627	188.459	45.8394
Cell 2	28.2843	0.391061	101.98	0.864484	56.5685	0.818942	89.4427	0.392499		182.209	71.2549	59.8136	51.7079	125.591	102.851	106.505	41.8032
Cell 2	44.7214	1.19676	107.703	0.543195	44.7214	0.420125	107.703	1.01279		41.6304	49.8218	72.5891	39.43	216.409	90.9188	41.051	41.5761
Cell 2	56.5685	0.378612	89.4427	0.775407	101.98	Inf	28.2843	0.27337		318.294	120.51	70.949	55.0143	0	31.8551	302.288	82.6363
Cell 2	44.7214	0.358908	82.4621	0.769943	82.4621	Inf	44.7214	0.243839		376.256	135.041	78.8665	60.7228	0	52.0689	219.782	53.5915
Cell 2	40	0.300795	80	0.729147	63.2456	3.06152	63.2456	0.288069		435.485	130.992	103.859	75.7282	28.1637	86.2236	140.181	40.3816
Cell 2	44.7214	0.446912	82.4621	0.560569	44.7214	2.22594	82.4621	0.647804		275.911	123.308	132.722	74.3999	46.1399	102.704	61.8803	40.0863
Cell 2	56.5685	0.73826	89.4427	0.342989	28.2843	0.521094	101.98	0.83806		115.381	85.1815	154.668	53.0494	205.426	107.046	37.6393	31.544
Cell 2	72.111	0.393087	72.111	0.792073	100	Inf	20	0.328988		333.837	131.227	114.991	91.0815	0	40.2885	224.524	73.8657
Cell 2	63.2456	0.310019	63.2456	0.667477	80	44.9534	40	0.482154		469.795	145.646	148.942	99.4151	1.58339	71.1788	89.0612	42.9412
Cell 2	60	0.338435	60	0.498215	60	1.41131	60	2.04003		481.619	162.997	215.867	107.548	65.0606	91.8205	16.5441	33.7505
Cell 2	63.2456	0.43424	63.2456	0.44568	40	1.40304	80	1.07737		343.592	149.201	223.005	99.3889	89.3625	125.379	26.8859	28.9661
Cell 2	72.111	0.718381	72.111	0.32928	20	0.576237	100	2.61853		179.38	128.863	282.97	93.1764	204.597	117.896	13.0585	34.1941
Cell 2	89.4427	0.450285	56.5685	0.818942	101.98	3.80657	28.2843	0.391061		343.601	154.718	125.591	102.851	11.3829	43.3297	182.209	71.2549
Cell 2	82.4621	0.507269	44.7214	0.420125	82.4621	0.687794	44.7214	1.19676		394.05	199.889	216.409	90.9188	99.6641	68.5484	41.6304	49.8218
Cell 2	80	0.517164	40	0.368698	63.2456	0.564793	63.2456	Inf		409.323	211.687	279.037	102.88	160.887	90.8676	0	40.7098
Cell 2	82.4621	0.575242	44.7214	0.388151	44.7214	0.522428	82.4621	Inf		316.418	182.017	300.992	116.83	208.007	108.669	0	37.746
Cell 2	89.4427	0.634056	56.5685	0.337403	28.2843	0.441384	101.98	Inf		176.32	111.797	270.459	91.2535	276.949	122.241	0	20.8255
Cell 2	107.703	0.571706	44.7214	2.22594	107.703	1.39294	44.7214	0.446912		242.563	138.674	46.1399	102.704	34.1663	47.5917	275.911	123.308
Cell 2	101.98	0.500443	28.2843	0.521094	89.4427	0.517058	56.5685	0.73826		280.06	140.154	205.426	107.046	150.09	77.6052	115.381	85.1815
Cell 2	100	0.638422	20	0.339261	72.111	0.388438	72.111	36.3077		237.957	151.917	288.442	97.8571	244.676	95.0416	1.24022	45.0295
Cell 2	101.98	0.882915	28.2843	0.27337	56.5685	0.378612	89.4427	Inf		187.734	165.753	302.288	82.6363	318.294	120.51	0	28.6117
Cell 2	107.703	0.973205	44.7214	0.243839	44.7214	0.358908	107.703	Inf		109.763	106.822	219.782	53.5915	376.256	135.041	0	31.2815
Cell 3	44.7214	0.61903	107.703	Inf	107.703	1.45164	44.7214	0.480126		314.848	194.9	0	27.6401	15.8002	22.9362	198.484	95.2973
Cell 3	28.2843	0.579107	101.98	Inf	89.4427	0.43547	56.5685	0.454674		354.672	205.393	0	24.7374	63.8203	27.7918	189.059	85.9601
Cell 3	20	0.478063	100	Inf	72.111	0.308027	72.111	0.789809		363.085	173.578	0	25.3636	137.133	42.2405	95.7617	75.6335
Cell 3	28.2843	0.46089	101.98	2.7824	56.5685	0.258976	89.4427	1.15476		326.104	150.298	9.84165	27.3834	268.137	69.441	25.7415	29.7252
Cell 3	44.7214	0.386298	107.703	3.75463	44.7214	0.372579	107.703	Inf		322.193	124.463	5.61932	21.0985	246.225	91.7382	0	24.0238
Cell 3	56.5685	0.519857	89.4427	0.501795	101.98	0.75971	28.2843	0.488436		331.014	172.08	36.1173	18.1235	42.233	32.0848	236.566	115.547
Cell 3	44.7214	0.744881	82.4621	0.71215	82.4621	0.280109	44.7214	0.463799		351.366	261.726	46.1383	32.8574	127.384	35.6812	255.435	118.47
Cell 3	40	0.420432	80	0.950014	63.2456	0.462768	63.2456	0.647647		354.738	149.143	23.8612	22.6685	215.144	99.5619	175.305	113.535
Cell 3	44.7214	0.294616	82.4621	0.740131	44.7214	0.522876	82.4621	0.539452		342.219	100.823	35.9484	26.6065	287.964	150.569	100.259	54.085
Cell 3	56.5685	0.283895	89.4427	1.04585	28.2843	0.781203	101.98	2.06824		385.037	109.31	25.7828	26.965	285.832	223.293	16.6853	34.5091
Cell 3	72.111	0.827779	72.111	0.257001	100	0.303592	20	0.380964		256.314	212.172	128.073	32.9151	113.25	34.3819	302.667	115.305
Cell 3	63.2456	0.529679	63.2456	0.43648	80	0.578389	40	0.52715		378.59	200.531	111.081	48.4845	156.314	90.4105	264.149	139.246
Cell 3	60	0.484177	60	0.29804	60	0.520974	60	0.462396		375.965	182.034	138.513	41.2824	257.983	134.402	226.753	104.85
Cell 3	63.2456	0.319538	63.2456	0.446879	40	0.774282	80	0.56226		377.596	120.656	100.655	44.9806	273.192	211.527	149.933	84.3014
Cell 3	72.111	0.23369	72.111	0.402648	20	0.488115	100	0.67805		387.825	90.631	88.4131	35.5994	358.557	175.017	60.8496	41.2591
Cell 3	89.4427	0.543418	56.5685	0.258976	101.98	0.321805	28.2843	0.46089		196.925	107.012	268.137	69.441	121.834	39.207	326.104	150.298
Cell 3	82.4621	0.457804	44.7214	0.372579	82.4621	0.259558	44.7214	0.386298		332.842	152.376	246.225	91.7382	203.454	52.808	322.193	124.463
Cell 3	80	0.412548	40	0.425148	63.2456	0.626873	63.2456	0.334152		381.176	157.253	220.108	93.5786	270.874	169.803	327.531	109.445
Cell 3	82.4621	0.208437	44.7214	0.480126	44.7214	0.61903	82.4621	0.486605		402.069	83.806	198.484	95.2973	314.848	194.9	218.425	106.287
Cell 3	89.4427	0.509358	56.5685	0.454674	28.2843	0.579107	101.98	0.661971		355.03	180.837	189.059	85.9601	354.672	205.393	94.4621	62.5312
Cell 3	107.703	0.518101	44.7214	0.522876	107.703	0.419402	44.7214	0.294616		132.023	68.4012	287.964	150.569	124.999	52.4247	342.219	100.823
Cell 3	101.98	0.235315	28.2843	0.781203	89.4427	0.455929	56.5685	0.283895		275.857	64.9135	285.832	223.293	229.674	104.715	385.037	109.31
Cell 3	100	0.22889	20	0.515789	72.111	0.558884	72.111	0.275749		351.276	80.4035	301.422	155.47	271.727	151.864	363.611	100.265
Cell 3	101.98	0.313989	28.2843	0.488436	56.5685	0.519857	89.4427	0.609318		298.065	93.589	236.566	115.547	331.014	172.08	219.648	133.836
Cell 3	107.703	0.552303	44.7214	0.463799	44.7214	0.744881	107.703	0.566388		256.292	141.551	255.435	118.47	351.366	261.726	78.7096	44.5802
Cell 4	44.7214	0.402573	107.703	0.3742	107.703	1.58302	44.7214	0.146818		389.102	156.642	129.121	48.3171	40.4164	63.9799	430.689	63.2329
Cell 4	28.2843	0.78011	101.98	0.243717	89.4427	0.837464	56.5685	0.117829		281.027	219.232	189.666	46.2248	106.302	89.0244	408.167	48.094
Cell 4	20	0.394709	100	0.226071	72.111	0.46972	72.111	0.148293		294.968	116.426	211.608	47.8384	256.852	120.648	339.71	50.3765
Cell 4	28.2843	0.298267	101.98	0.232634	56.5685	0.735404	89.4427	0.233868		289.709	86.4106	223.049	51.8887	289.502	212.901	127.656	29.8547
Cell 4	44.7214	0.330251	107.703	0.292129	44.7214	0.351259	107.703	1.57373		320.118	105.719	195.393	57.08	338.596	118.935	14.9739	23.565
Cell 4	56.5685	0.38471	89.4427	0.427871	101.98	0.694523	28.2843	0.240202		360.153	138.554	211.244	90.3851	117.091	81.3227	330.536	79.3955
Cell 4	44.7214	0.530475	82.4621	0.375908	82.4621	0.746392	44.7214	0.12466		255.742	135.665	275.837	103.689	170.905	127.562	406.219	50.6392
Cell 4	40	0.604233	80	0.158981	63.2456	0.608114	63.2456	0.0768919		180.857	109.28	319.979	50.8706	274.59	166.982	351.554	27.0317
Cell 4	44.7214	0.486897	82.4621	0.220014	44.7214	0.68646	82.4621	0.160188		185.004	90.0779	297.136	65.3741	292.019	200.459	168.463	26.9858
Cell 4	56.5685	0.226363	89.4427	0.188566	28.2843	0.654351	101.98	0.5074		254.8	57.6774	287.661	54.2432	284.539	186.188	46.6732	23.682
Cell 4	72.111	0.577579	72.111	0.36758	100	0.740494	20	0.329409		242.804	140.239	234.989	86.3774	126.919	93.9829	328.339	108.158
Cell 4	63.2456	0.652882	63.2456	0.30048	80	0.41253	40	0.14208		184.901	120.719	318.342	95.6551	285.207	117.656	348.977	49.5826
Cell 4	60	0.861241	60	0.197345	60	0.473975	60	0.133961		104.693	90.1655	343	67.6893	329.798	156.316	300.406	40.2425
Cell 4	63.2456	1.0035	63.2456	0.145118	40	0.712202	80	0.200414		59.542	59.7507	356.578	51.7458	301.414	214.668	194.753	39.0314
Cell 4	72.111	0.559453	72.111	0.132724	20	0.632559	100	0.479394		91.1972	51.0205	383.766	50.935	287.721	182	58.6919	28.1365
Cell 4	89.4427	0.910787	56.5685	0.735404	101.98	0.405516	28.2843	0.298267		119.782	109.096	289.502	212.901	286.645	116.239	289.709	86.4106
Cell 4	82.4621	0.976667	44.7214	0.351259	82.4621	0.564883	44.7214	0.330251		96.3086	94.0614	338.596	118.935	332.602	187.881	320.118	105.719
Cell 4	80	2.64308	40	0.270775	63.2456	0.521149	63.2456	0.0966698		31.9605	84.4742	370.213	100.245	430.582	224.397	316.351	30.5816
Cell 4	82.4621	Inf	44.7214	0.146818	44.7214	0.402573	82.4621	0.111795		0	54.2722	430.689	63.2329	389.102	156.642	202.592	22.6488
Cell 4	89.4427	Inf	56.5685	0.117829	28.2843	0.78011	101.98	0.561006		0	23.731	408.167	48.094	281.027	219.232	48.5389	27.2306
Cell 4	107.703	2.2326	44.7214	0.68646	107.703	0.3892	44.7214	0.486897		37.3738	83.4406	292.019	200.459	357.949	139.314	185.004	90.0779
Cell 4	101.98	2.11052	28.2843	0.654351	89.4427	0.519443	56.5685	0.226363		32.4884	68.5673	284.539	186.188	363.184	188.653	254.8	57.6774
Cell 4	100	4.57342	20	0.534153	72.111	0.435153	72.111	0.165434		10.1272	46.3158	324.729	173.455	380.933	165.764	197.171	32.6189
Cell 4	101.98	Inf	28.2843	0.240202	56.5685	0.38471	89.4427	0.248307		0	54.2759	330.536	79.3955	360.153	138.554	121.503	30.17
Cell 4	107.703	Inf	44.7214	0.12466	44.7214	0.530475	107.703	1.31632		0	28.0839	406.219	50.6392	255.742	135.665	23.011	30.2898
Cell 5	44.7214	0.728551	107.703	0.905253	44.7214	0.215388	107.703	Inf		345.71	251.867	27.237	24.6564	285.78	61.5536	0	19.2643
Cell 5	56.5685	0.748423	89.4427	0.247813	28.2843	0.300206	101.98	1.20305		381.701	285.674	114.111	28.2781	306.072	91.8844	19.2361	23.1419
Cell 5	72.111	0.632239	72.111	0.326067	20	0.307184	100	0.843056		370.924	234.512	175.72	57.2963	297.87	91.5009	28.4786	24.009
Cell 5	89.4427	0.997415	56.5685	0.360934	28.2843	0.725667	101.98	1.56327		349.756	348.852	182.588	65.9022	300.754	218.248	19.5567	30.5724
Cell 5	107.703	1.66206	44.7214	1.54645	44.7214	1.883	107.703	3.44669		241.104	400.73	238.169	368.316	210.241	395.885	10.3887	35.8067
Cell 5	28.2843	0.984566	101.98	0.382388	56.5685	0.217691	89.4427	2.951		307.869	303.117	60.6249	23.1823	188.046	40.9361	5.7302	16.9098
Cell 5	44.7214	0.36498	82.4621	0.264931	44.7214	0.25806	82.4621	0.460898		381.411	139.207	112.925	29.9174	250.471	64.6365	70.1299	32.3227
Cell 5	63.2456	0.237364	63.2456	0.297837	40	0.280165	80	0.359505		374.685	88.9369	206.404	61.4747	277.992	77.8836	93.7041	33.6871
Cell 5	82.4621	0.703185	44.7214	1.43138	44.7214	0.964031	82.4621	0.670394		360.449	253.463	245.675	351.655	309.358	298.23	122.043	81.817
Cell 5	101.98	1.32945	28.2843	1.4749	56.5685	1.60987	89.4427	0.796756		265.404	352.841	249.59	368.12	230.56	371.171	96.3147	76.7394
Cell 5	20	0.597967	100	0.435063	72.111	0.650406	72.111	0.487719		279.006	166.836	50.3812	21.919	63.5867	41.3572	102.109	49.8007
Cell 5	40	0.591486	80	0.169101	63.2456	0.540093	63.2456	0.531033		277.458	164.113	143.978	24.3469	83.769	45.2431	125.225	66.4984
Cell 5	60	0.400703	60	0.3763	60	0.441092	60	1.09984		302.13	121.064	230.555	86.7581	177.469	78.2804	206.774	227.419
Cell 5	80	1.29959	40	0.291694	63.2456	0.82437	63.2456	0.710011		302.689	393.371	271.473	79.187	241.395	198.999	262.567	186.426
Cell 5	100	1.52444	20	1.37149	72.111	1.14563	72.111	0.832902		278.26	424.191	277.019	379.928	232.093	265.892	263.901	219.804
Cell 5	28.2843	0.725667	101.98	0.669971	89.4427	3.12553	56.5685	0.360934		300.754	218.248	32.0957	21.5032	10.2637	32.0795	182.588	65.9022
Cell 5	44.7214	1.883	82.4621	0.405866	82.4621	Inf	44.7214	1.54645		210.241	395.885	101.001	40.9928	0	29.3705	238.169	368.316
Cell 5	63.2456	1.20165	63.2456	0.228626	80	0.407584	40	1.07448		264.68	318.052	214.174	48.9659	69.9084	28.4936	270.241	290.368
Cell 5	82.4621	1.23255	44.7214	0.215388	82.4621	0.423176	44.7214	0.728551		271.841	335.059	285.78	61.5536	115.613	48.9246	345.71	251.867
Cell 5	101.98	1.172	28.2843	0.300206	89.4427	0.626136	56.5685	0.748423		279.477	327.547	306.072	91.8844	130.292	81.5806	381.701	285.674
Cell 5	44.7214	0.964031	107.703	12.6385	107.703	Inf	44.7214	1.43138		309.358	298.23	1.75928	22.2347	0	18.8747	245.675	351.655
Cell 5	56.5685	1.60987	89.4427	0.694742	101.98	Inf	28.2843	1.4749		230.56	371.171	37.0895	25.7676	0	20.0208	249.59	368.12
Cell 5	72.111	2.40489	72.111	0.215048	100	3.87449	20	1.50648		182.261	438.318	159.568	34.3147	5.42964	21.0371	321.551	484.41
Cell 5	89.4427	1.70355	56.5685	0.217691	101.98	1.58113	28.2843	0.984566		159.185	271.18	188.046	40.9361	13.8171	21.8466	307.869	303.117
Cell 5	107.703	0.588264	44.7214	0.25806	107.703	1.60767	44.7214	0.36498		184.654	108.625	250.471	64.6365	20.7817	33.41	381.411	139.207
Cell 6	28.2843	0.849142	141.421	Inf	101.98	0.836905	101.98	3.38448		249.427	211.799	0	36.1289	52.0519	43.5625	20.8163	70.4521
Cell 6	44.7214	1.22463	128.062	Inf	82.4621	0.641915	107.703	2.22617		211.904	259.505	0	34.9927	120.131	77.1137	34.9511	77.8071
Cell 6	63.2456	1.16472	116.619	Inf	63.2456	0.850784	116.619	1.39998		179.451	209.01	0	26.427	167.145	142.204	57.0777	79.9076
Cell 6	82.4621	1.30194	107.703	Inf	44.7214	1.2854	128.062	1.19644		228.257	297.177	0	47.1459	133.842	172.04	84.3319	100.898
Cell 6	101.98	1.53056	101.98	5.91436	28.2843	1.0446	141.421	1.55854		248.635	380.552	5.79997	34.3031	189.937	198.408	58.9418	91.8633
Cell 6	44.7214	0.717574	128.062	Inf	107.703	2.02211	82.4621	1.01089		211.377	151.678	0	21.1895	29.2256	59.0974	85.8198	86.7542
Cell 6	56.5685	0.898858	113.137	Inf	89.4427	1.16993	89.4427	1.25478		186.654	167.776	0	28.4513	97.4474	114.006	118.675	148.912
Cell 6	72.111	0.907924	100	Inf	72.111	1.17292	100	1.17322		217.091	197.102	0	22.5105	157.681	184.947	140.503	164.841
Cell 6	89.4427	1.03481	89.4427	Inf	56.5685	1.0734	113.137	0.887383		213.829	221.271	0	33.033	154.32	165.648	196.225	174.126
Cell 6	107.703	1.62762	82.4621	1.204	44.7214	1.42523	128.062	1.20633		219.561	357.362	51.4851	61.9883	141.422	201.559	127.061	153.278
Cell 6	63.2456	1.09395	116.619	Inf	116.619	4.28315	63.2456	0.731267		177.95	194.668	0	34.8414	17.9924	77.064	229.377	167.736
Cell 6	72.111	1.03308	100	2.82393	100	1.2888	72.111	0.63772		196.03	202.515	11.138	31.453	57.9408	74.6739	209.855	133.829
Cell 6	84.8528	1.13607	84.8528	1.00823	84.8528	1.08395	84.8528	1.22539		183.02	207.923	42.2496	42.5972	128.402	139.182	196.626	240.944
Cell 6	100	2.12209	72.111	0.68547	72.111	1.22489	100	1.07593		159.592	338.669	88.4188	60.6085	118.254	144.848	209.627	225.544
Cell 6	116.619	2.38827	63.2456	0.784012	63.2456	1.66295	116.619	1.33101		132.19	315.705	123.472	96.8037	125.862	209.302	147.365	196.145
Cell 6	82.4621	1.17799	107.703	4.92483	128.062	26.9592	44.7214	1.03672		179.038	210.905	5.93841	29.2457	2.49954	67.3857	232.613	241.155
Cell 6	89.4427	1.38068	89.4427	0.524222	113.137	2.8135	56.5685	1.30705		200.826	277.277	61.5521	32.2669	34.7583	97.7925	234.318	306.265
Cell 6	100	1.81279	72.111	0.339503	100	1.66857	72.111	1.07578		160.709	291.332	106.459	36.1432	64.47	107.573	274.049	294.815
Cell 6	113.137	1.83699	56.5685	0.765224	89.4427	1.68497	89.4427	1.40919		149.891	275.348	138.777	106.195	110.277	185.813	208.106	293.261
Cell 6	128.062	4.92209	44.7214	0.99573	82.4621	1.69494	107.703	1.30152		59.8098	294.389	193.707	192.88	117.203	198.652	193.971	252.456
Cell 6	101.98	1.13283	101.98	1.1271	141.421	Inf	28.2843	0.893973		205.581	232.889	22.8601	25.7656	0	56.0277	265.727	237.553
Cell 6	107.703	1.4091	82.4621	0.467099	128.062	Inf	44.7214	1.09969		200.333	282.29	81.0488	37.8578	0	100.173	213.147	234.395
Cell 6	116.619	1.76699	63.2456	0.637747	116.619	2.30255	63.2456	1.36842		136.256	240.763	121.537	77.5099	41.4915	95.5362	193.169	264.335
Cell 6	128.062	3.35576	44.7214	0.609852	107.703	2.26075	82.4621	1.07971		79.8343	267.905	205.721	125.459	80.5388	182.079	202.918	219.093
Cell 6	141.421	7.98738	28.2843	0.895692	101.98	1.36401	101.98	1.42557		31.9014	254.809	220.949	197.902	143.635	195.92	210.928	300.694
Cell 7	101.98	0.950671	101.98	1.81077	141.421	Inf	28.2843	0.685006		155.356	147.693	11.0478	20.0051	0	18.2265	100.118	68.5815
Cell 7	82.4621	0.820364	107.703	2.18098	128.062	2.89774	44.7214	0.566428		224.395	184.086	7.70764	16.8102	6.93649	20.1001	93.6959	53.072
Cell 7	63.2456	1.04656	116.619	4.50428	116.619	1.10271	63.2456	0.550355		274.053	286.814	3.61719	16.2929	14.1316	15.5831	66.2298	36.4499
Cell 7	44.7214	0.597079	128.062	Inf	107.703	Inf	82.4621	0.854456		235.521	140.625	0	17.5625	0	17.3223	22.7312	19.4228
Cell 7	28.2843	0.47644	141.421	Inf	101.98	3.9336	101.98	Inf		204.005	97.196	0	19.7157	4.61509	18.1539	0	16.8577
Cell 7	107.703	0.639557	82.4621	0.421291	128.062	Inf	44.7214	1.93742		203.738	130.302	52.3703	22.0631	0	20.1805	56.8659	110.173
Cell 7	89.4427	1.25174	89.4427	0.382599	113.137	0.664262	56.5685	3.11609		224.216	280.659	51.4039	19.6671	28.1968	18.7301	36.4747	113.659
Cell 7	72.111	0.707244	100	0.426527	100	0.451821	72.111	2.7197		260.195	184.021	38.7882	16.5442	36.4441	16.4662	23.6039	64.1955
Cell 7	56.5685	0.416659	113.137	2.06767	89.4427	0.24205	89.4427	2.32736		267.768	111.568	8.18903	16.9322	72.7285	17.6039	15.6894	36.5149
Cell 7	44.7214	0.571314	128.062	Inf	82.4621	0.313976	107.703	Inf		166.166	94.9332	0	14.9875	61.9272	19.4437	0	21.8251
Cell 7	116.619	2.06142	63.2456	0.195022	116.619	0.794335	63.2456	5.99538		95.3464	196.549	141.514	27.5984	26.2636	20.8621	27.7124	166.146
Cell 7	100	1.08181	72.111	0.380547	100	0.3006	72.111	Inf		202.771	219.36	126.185	48.0192	86.1952	25.9103	0	128.13
Cell 7	84.8528	0.893075	84.8528	0.347146	84.8528	0.22391	84.8528	Inf		237.815	212.387	67.1254	23.3024	113.985	25.5223	0	96.2012
Cell 7	72.111	0.772927	100	0.435619	72.111	0.148374	100	Inf		224.635	173.626	42.358	18.452	183.035	27.1576	0	34.6594
Cell 7	63.2456	0.681242	116.619	Inf	63.2456	0.255753	116.619	Inf		187.255	127.566	0	18.1718	179.186	45.8273	0	22.3991
Cell 7	128.062	1.52437	44.7214	0.465493	107.703	0.44497	82.4621	11.3661		75.7873	115.528	176.76	82.2805	60.405	26.8784	10.3557	117.704
Cell 7	113.137	2.12131	56.5685	0.459237	89.4427	0.263524	89.4427	Inf		110.897	235.247	117.809	54.1022	138.811	36.58	0	81.1299
Cell 7	100	1.72557	72.111	0.538861	72.111	0.229779	100	Inf		150.971	260.51	63.0698	33.9858	202.744	46.5863	0	31.1651
Cell 7	89.4427	0.914386	89.4427	0.853236	56.5685	0.190344	113.137	Inf		178.21	162.953	23.1953	19.791	240.701	45.816	0	25.2999
Cell 7	82.4621	0.885518	107.703	Inf	44.7214	0.292184	128.062	Inf		135.265	119.78	0	15.9457	273.925	80.0364	0	16.5994
Cell 7	141.421	10.9615	28.2843	0.955104	101.98	0.623218	101.98	Inf		22.2519	243.914	124.211	118.635	80.4871	50.161	0	89.8598
Cell 7	128.062	4.94515	44.7214	1.20785	82.4621	0.419232	107.703	Inf		57.8619	286.136	78.8465	95.2347	188.79	79.1469	0	53.4766
Cell 7	116.619	3.15327	63.2456	3.91304	63.2456	0.504593	116.619	Inf		82.9797	261.658	10.7434	42.0396	243.474	122.855	0	28.6615
Cell 7	107.703	3.57204	82.4621	Inf	44.7214	0.431511	128.062	Inf		52.8543	188.798	0	19.2177	265.131	114.407	0	19.1129
Cell 7	101.98	3.10857	101.98	Inf	28.2843	0.293086	141.421	Inf		53.8168	167.294	0	16.6329	233.408	68.4088	0	16.0015
Cell 8	101.98	1.05515	101.98	0.321696	141.421	5.8322	28.2843	0.374981		112.914	119.142	256.479	82.5084	10.0004	58.3245	359.522	134.814
Cell 8	82.4621	0.741382	107.703	0.253433	128.062	1.21992	44.7214	0.382095		223.439	165.654	204.681	51.8728	57.0326	69.5751	266.098	101.675
Cell 8	63.2456	0.492431	116.619	0.227362	116.619	0.535353	63.2456	0.466804		285.389	140.534	105.341	23.9505	128.016	68.5337	154.772	72.2483
Cell 8	44.7214	0.50158	128.062	0.763017	107.703	0.424606	82.4621	0.614167		312.518	156.753	32.8862	25.0927	213.263	90.5529	83.5973	51.3427
Cell 8	28.2843	0.461093	141.421	Inf	101.98	0.562571	101.98	0.641233		308.509	142.251	0	19.3004	229.98	129.38	51.9716	33.3259
Cell 8	107.703	0.794551	82.4621	0.428752	128.062	Inf	44.7214	0.361813		126.117	100.206	303.253	130.02	0	50.8709	289.046	104.581
Cell 8	89.4427	0.615759	89.4427	0.288867	113.137	2.26897	56.5685	0.548682		237.111	146.003	251.263	72.5815	46.7579	106.092	158.609	87.0262
Cell 8	72.111	0.4452	100	0.276868	100	0.459992	72.111	0.809865		293.199	130.532	112.973	31.2786	174.296	80.1746	58.92	47.7173
Cell 8	56.5685	0.630654	113.137	1.22836	89.4427	0.370194	89.4427	2.37347		239.702	151.169	32.7609	40.2421	257.436	95.3011	14.9503	35.4841
Cell 8	44.7214	0.472353	128.062	Inf	82.4621	0.239818	107.703	Inf		301.11	142.23	0	22.361	304.037	72.9138	0	26.8246
Cell 8	116.619	1.10541	63.2456	0.338007	116.619	86.5602	63.2456	0.492052		98.9356	109.365	315.996	106.809	0.660892	57.2069	212.895	104.755
Cell 8	100	0.666699	72.111	0.327383	100	1.2441	72.111	0.545304		198.251	132.174	222.609	72.8783	55.4675	69.0071	133.484	72.7896
Cell 8	84.8528	0.472161	84.8528	0.374259	84.8528	0.424941	84.8528	1.58174		304.36	143.707	120.365	45.0479	211.538	89.8911	32.6041	51.5714
Cell 8	72.111	0.426072	100	1.01031	72.111	0.261049	100	Inf		278.959	118.857	37.911	38.3018	338.151	88.274	0	33.2365
Cell 8	63.2456	0.574979	116.619	5.1893	63.2456	0.259496	116.619	Inf		230.54	132.555	5.39434	27.9929	359.876	93.3864	0	33.4014
Cell 8	128.062	0.907365	44.7214	0.339221	107.703	6.52714	82.4621	0.707093		68.5719	62.2197	363.967	123.465	9.56234	62.4148	122.731	86.7822
Cell 8	113.137	0.85624	56.5685	0.389614	89.4427	0.857026	89.4427	1.22147		171.822	147.121	293.364	114.299	101.99	87.4083	54.6938	66.8066
Cell 8	100	0.6522	72.111	0.415781	72.111	0.523868	100	Inf		226.156	147.499	210.039	87.3304	229.114	120.025	0	42.1426
Cell 8	89.4427	1.21252	89.4427	0.333847	56.5685	0.377204	113.137	Inf		177.987	215.814	154.049	51.4289	337.845	127.437	0	28.7714
Cell 8	82.4621	0.791144	107.703	0.435562	44.7214	0.439124	128.062	Inf		189.116	149.618	113.048	49.2395	358.884	157.595	0	24.6519
Cell 8	141.421	0.841055	28.2843	0.32486	101.98	1.63224	101.98	2.78984		50.735	42.6709	430.509	139.855	42.278	69.0078	21.9646	61.2778
Cell 8	128.062	2.01639	44.7214	0.351057	82.4621	0.897125	107.703	57.7341		78.5978	158.484	368.813	129.474	129.325	116.021	0.691182	39.9048
Cell 8	116.619	1.78608	63.2456	0.410443	63.2456	0.723016	116.619	Inf		122.327	218.487	298.03	122.324	261.86	189.329	0	25.5262
Cell 8	107.703	1.25511	82.4621	0.344	44.7214	0.5858	128.062	Inf		136.417	171.219	243.772	83.8575	301.309	176.507	0	26.5609
Cell 8	101.98	0.766319	101.98	0.401603	28.2843	0.516172	141.421	Inf		117.507	90.0482	184.046	73.9134	347.961	179.608	0	26.8462
Cell 9	101.98	1.18597	101.98	0.806553	141.421	Inf	28.2843	0.765345		232.327	275.533	38.5649	31.1047	0	22.9516	372.862	285.368
Cell 9	82.4621	1.30633	107.703	1.3989	128.062	Inf	44.7214	1.55422		295.945	386.601	16.4962	23.0764	0	30.5175	358.579	557.31
Cell 9	63.2456	1.2636	116.619	Inf	116.619	Inf	63.2456	0.916853		321.94	406.805	0	21.615	0	57.5324	304.096	278.811
Cell 9	44.7214	1.25786	128.062	Inf	107.703	Inf	82.4621	0.824677		356.396	448.296	0	26.4336	0	98.5632	255.549	210.746
Cell 9	28.2843	0.8879	141.421	Inf	101.98	1.25697	101.98	0.77242		387.175	343.772	0	23.7623	33.0606	41.5561	171.733	132.65
Cell 9	107.703	1.00301	82.4621	0.256625	128.062	Inf	44.7214	0.531619		251.978	252.737	152.736	39.1957	0	24.5179	432.907	230.141
Cell 9	89.4427	1.10728	89.4427	0.447332	113.137	Inf	56.5685	0.757631		326.91	361.98	81.1691	36.3096	0	73.9554	309.065	234.157
Cell 9	72.111	0.641081	100	6.39468	100	73.097	72.111	0.808555		417.691	267.773	8.84142	56.538	1.97234	144.172	268.766	217.312
Cell 9	56.5685	0.592155	113.137	0.890506	89.4427	2.92268	89.4427	0.894825		431.64	255.598	33.6076	29.9278	66.3672	193.97	180.116	161.172
Cell 9	44.7214	0.978993	128.062	1.37515	82.4621	1.68831	107.703	0.569128		460.284	450.615	23.3593	32.1226	105.174	177.566	122.489	69.7122
Cell 9	116.619	1.64716	63.2456	0.592705	116.619	Inf	63.2456	0.517365		171.705	282.825	202.478	120.01	0	32.7522	414.019	214.199
Cell 9	100	1.25371	72.111	0.601965	100	5.97067	72.111	0.59826		259.041	324.763	160.479	96.6027	23.6588	141.259	325.985	195.024
Cell 9	84.8528	1.27462	84.8528	0.825336	84.8528	3.49094	84.8528	0.440886		381.112	485.773	101.755	83.9822	65.2998	227.958	239.902	105.769
Cell 9	72.111	0.760917	100	0.685938	72.111	1.86763	100	0.509429		437.131	332.62	77.3549	53.0607	146.656	273.899	156.396	79.6727
Cell 9	63.2456	0.915117	116.619	0.442832	63.2456	1.22593	116.619	1.28831		456.155	417.436	48.0869	21.2944	248.857	305.082	40.8428	52.6184
Cell 9	128.062	4.0446	44.7214	1.26055	107.703	4.56489	82.4621	0.847769		53.1238	214.864	297.514	375.031	20.0984	91.7471	328.595	278.573
Cell 9	113.137	1.608	56.5685	0.415751	89.4427	2.37407	89.4427	0.606596		162.905	261.952	246.024	102.284	113.738	270.022	249.065	151.082
Cell 9	100	1.10363	72.111	0.650142	72.111	1.8437	100	0.466111		252.258	278.4	205.55	133.636	154.05	284.02	186.557	86.9561
Cell 9	89.4427	0.884911	89.4427	0.555891	56.5685	1.22717	113.137	1.00341		353.061	312.428	169.452	94.1969	278.694	342.006	89.9046	90.2112
Cell 9	82.4621	1.22915	107.703	0.317813	44.7214	1.39121	128.062	1.95139		289.05	355.287	118.626	37.7008	272.226	378.722	36.6791	71.5753
Cell 9	141.421	8.32979	28.2843	0.707576	101.98	2.89656	101.98	1.83983		18.5378	154.416	366.902	259.611	77.2801	223.847	193.682	356.34
Cell 9	128.062	1.80683	44.7214	0.497291	82.4621	1.56387	107.703	0.948612		78.8478	142.465	384.263	191.09	167.902	262.577	153.321	145.442
Cell 9	116.619	1.66052	63.2456	0.731432	63.2456	1.82513	116.619	1.0503		139.792	232.128	318.86	233.224	242.12	441.901	76.2488	80.0844
Cell 9	107.703	1.43003	82.4621	0.545342	44.7214	1.74342	128.062	1.87357		177.862	254.347	200.646	109.421	290.954	507.255	27.1914	50.9448
Cell 9	101.98	1.96715	101.98	1.15505	28.2843	1.37674	141.421	2.78612		148.262	291.653	105.969	122.4	316.045	435.111	10.902	30.3743
Cell 10	44.7214	0.817738	107.703	Inf	107.703	Inf	44.7214	0.577484		226.765	185.434	0	43.7627	0	41.5834	263.918	152.408
Cell 10	28.2843	1.49974	101.98	Inf	89.4427	Inf	56.5685	0.64319		293.6	440.324	0	33.0619	0	42.9537	249.533	160.497
Cell 10	20	1.61745	100	Inf	72.111	Inf	72.111	0.807689		366.765	593.225	0	43.1523	0	63.5052	207.792	167.831
Cell 10	28.2843	1.67719	101.98	Inf	56.5685	Inf	89.4427	1.23604		372.239	624.317	0	41.6565	0	179.998	129.785	160.421
Cell 10	44.7214	1.29	107.703	Inf	44.7214	3.71023	107.703	1.68528		360.032	464.442	0	30.8443	55.9048	207.42	87.4864	147.439
Cell 10	56.5685	1.13931	89.4427	Inf	101.98	Inf	28.2843	0.648013		248.006	282.556	0	47.4603	0	39.2096	339.728	220.148
Cell 10	44.7214	1.938	82.4621	Inf	82.4621	Inf	44.7214	0.814126		307.881	596.674	0	50.7736	0	65.0606	318.677	259.443
Cell 10	40	1.07461	80	3.59542	63.2456	18.8464	63.2456	0.841542		401.523	431.481	24.9597	89.7409	14.9465	281.688	294.379	247.732
Cell 10	44.7214	1.35104	82.4621	0.981403	44.7214	4.63142	82.4621	1.2566		434.119	586.512	50.5314	49.5916	45.281	209.716	214.505	269.548
Cell 10	56.5685	1.21562	89.4427	1.12732	28.2843	2.34276	101.98	0.928466		403.833	490.906	35.2127	39.6959	149.891	351.158	154.169	143.14
Cell 10	72.111	1.4829	72.111	Inf	100	Inf	20	1.00204		256.471	380.322	0	113.453	0	182.56	324.436	325.099
Cell 10	63.2456	1.45243	63.2456	7.85795	80	175.618	40	0.867711		285.071	414.046	18.0531	141.86	0.408826	71.7971	323.785	280.952
Cell 10	60	1.59673	60	2.76841	60	2.02726	60	1.19391		403.375	644.082	97.5148	269.961	62.2217	126.139	290.75	347.13
Cell 10	63.2456	1.07056	63.2456	0.762446	40	1.91117	80	1.07078		442.782	474.024	150.931	115.076	118.094	225.697	268.298	287.288
Cell 10	72.111	1.16019	72.111	1.61574	20	0.980555	100	0.871673		407.144	472.365	124.068	200.461	210.743	206.645	208.43	181.683
Cell 10	89.4427	0.923798	56.5685	Inf	101.98	Inf	28.2843	1.67719		256.577	237.025	0	179.998	0	74.8252	372.239	624.317
Cell 10	82.4621	1.66792	44.7214	3.71023	82.4621	4.48448	44.7214	1.29		252.275	420.774	55.9048	207.42	28.7181	128.786	360.032	464.442
Cell 10	80	1.6395	40	1.18691	63.2456	2.61292	63.2456	1.73571		333.034	546.01	177.827	211.065	113.08	295.469	294.403	510.999
Cell 10	82.4621	1.30876	44.7214	0.577484	44.7214	0.817738	82.4621	0.851978		364.7	477.304	263.918	152.408	226.765	185.434	301.756	257.089
Cell 10	89.4427	0.972963	56.5685	0.64319	28.2843	1.49974	101.98	0.972213		317.222	308.646	249.533	160.497	293.6	440.324	210.949	205.087
Cell 10	107.703	1.3654	44.7214	4.63142	107.703	4.82347	44.7214	1.35104		256.201	349.816	45.281	209.716	13.4191	64.7265	434.119	586.512
Cell 10	101.98	1.65626	28.2843	2.34276	89.4427	2.03257	56.5685	1.21562		212.929	352.664	149.891	351.158	73.5577	149.511	403.833	490.906
Cell 10	100	1.26578	20	1.47196	72.111	1.19367	72.111	1.22937		281.59	356.431	229.28	337.49	189.706	226.447	358.377	440.576
Cell 10	101.98	1.25581	28.2843	0.648013	56.5685	1.13931	89.4427	1.12617		284.498	357.276	339.728	220.148	248.006	282.556	330.139	371.792
Cell 10	107.703	1.96443	44.7214	0.814126	44.7214	1.938	107.703	1.22268		178.737	351.117	318.677	259.443	307.881	596.674	242.769	296.828
Cell 11	28.2843	1.15261	141.421	Inf	101.98	1.87714	101.98	0.232908		340.967	393.003	0	30.277	30.2988	56.8749	156.672	36.4903
Cell 11	44.7214	0.604727	128.062	9.35646	82.4621	0.798541	107.703	0.635687		290.481	175.661	3.30651	30.9372	129.419	103.347	45.9726	29.2242
Cell 11	63.2456	1.16203	116.619	1.00559	63.2456	0.95845	116.619	7.34174		237.141	275.566	49.1222	49.3966	191.98	184.003	4.21074	30.9141
Cell 11	82.4621	4.04517	107.703	0.946059	44.7214	1.07425	128.062	Inf		66.8911	270.586	113.12	107.018	252.808	271.578	0	25.1149
Cell 11	101.98	6.73608	101.98	0.684453	28.2843	1.62366	141.421	Inf		31.0077	208.87	198.71	136.008	303.126	492.173	0	30.6702
Cell 11	44.7214	1.16628	128.062	Inf	107.703	33.5893	82.4621	0.292994		285.51	332.984	0	24.1739	1.10666	37.172	281.861	82.5836
Cell 11	56.5685	1.45448	113.137	0.810299	89.4427	1.81593	89.4427	0.232077		243.638	354.365	41.1805	33.3686	55.8973	101.505	157.039	36.4453
Cell 11	72.111	1.61001	100	1.00764	72.111	0.914454	100	0.575279		185.001	297.854	91.3381	92.0357	159.372	145.739	87.5	50.3369
Cell 11	89.4427	3.26767	89.4427	0.605594	56.5685	1.08018	113.137	1.11667		77.0253	251.693	192.288	116.448	221.879	239.668	26.3133	29.3833
Cell 11	107.703	Inf	82.4621	0.634756	44.7214	1.48772	128.062	Inf		0	242.154	279.133	177.182	278.664	414.575	0	29.9221
Cell 11	63.2456	0.953945	116.619	Inf	116.619	Inf	63.2456	0.615934		288.978	275.669	0	35.3432	0	27.0797	344.996	212.494
Cell 11	72.111	2.46275	100	0.920211	100	1.35915	72.111	0.620608		187.015	460.571	53.4472	49.1827	50.8236	69.0769	260.496	161.666
Cell 11	84.8528	2.87976	84.8528	0.816932	84.8528	1.02084	84.8528	0.70474		104.368	300.556	124.171	101.439	131.204	133.938	124.209	87.5349
Cell 11	100	10.3683	72.111	0.713256	72.111	0.814208	100	1.51866		28.91	299.747	240.487	171.529	215.217	175.231	51.6656	78.4622
Cell 11	116.619	Inf	63.2456	0.767753	63.2456	0.983332	116.619	7.54466		0	166.161	320.972	246.427	305.298	300.21	7.35888	55.5202
Cell 11	82.4621	1.9409	107.703	Inf	128.062	3.8765	44.7214	0.991591		185.452	359.942	0	46.1335	4.03392	15.6375	302.131	299.591
Cell 11	89.4427	3.04045	89.4427	1.29922	113.137	1.09847	56.5685	1.38633		104.325	317.195	50.5552	65.6825	31.8481	34.9842	242.906	336.748
Cell 11	100	9.2069	72.111	0.847098	100	0.299036	72.111	1.187		41.6705	383.656	125.859	106.615	128.725	38.4935	145.445	172.642
Cell 11	113.137	860.381	56.5685	0.851944	89.4427	0.558133	89.4427	2.52463		0.323921	278.695	234.983	200.192	205.534	114.715	53.1843	134.271
Cell 11	128.062	Inf	44.7214	0.970653	82.4621	0.568628	107.703	Inf		0	189.021	354.065	343.674	262.418	149.218	0	81.4877
Cell 11	101.98	1.86583	101.98	1.35786	141.421	Inf	28.2843	1.23084		150.354	280.535	27.3458	37.1318	0	25.4773	272.28	335.132
Cell 11	107.703	3.70662	82.4621	0.538149	128.062	1.89801	44.7214	1.33694		70.3589	260.794	110.094	59.247	13.6595	25.9259	245.934	328.8
Cell 11	116.619	32.6689	63.2456	0.477104	116.619	0.674073	63.2456	1.26142		9.42709	307.973	150.929	72.009	53.0856	35.7836	174.027	219.521
Cell 11	128.062	Inf	44.7214	0.964488	107.703	1.35704	82.4621	3.30438		0	213.4	259.186	249.982	63.2779	85.8709	66.7927	220.709
Cell 11	141.421	Inf	28.2843	1.21058	101.98	0.853314	101.98	5.07739		0	175.203	339.785	411.337	149.013	127.155	12.8973	65.4845
Cell 12	44.7214	1.96017	107.703	Inf	107.703	2.50861	44.7214	1.29754		244.293	478.855	0	29.9462	26.2651	65.8891	260.99	338.645
Cell 12	28.2843	1.43703	101.98	Inf	89.4427	0.606838	56.5685	1.0404		393.771	565.861	0	29.4154	105.488	64.0142	229.43	238.699
Cell 12	20	1.66267	100	Inf	72.111	1.41969	72.111	1.1009		405.37	673.998	0	26.3628	152.626	216.682	172.047	189.406
Cell 12	28.2843	1.41925	101.98	Inf	56.5685	1.65224	89.4427	1.00733		375.548	532.997	0	27.0437	146.44	241.954	53.5382	53.9306
Cell 12	44.7214	1.37672	107.703	3.70729	44.7214	2.24554	107.703	Inf		401.502	552.754	6.85512	25.4139	146.982	330.055	0	30.5512
Cell 12	56.5685	2.33533	89.4427	Inf	101.98	3.57509	28.2843	1.01938		173.04	404.106	0	94.1824	29.3415	104.899	402.151	409.946
Cell 12	44.7214	2.37891	82.4621	4.96613	82.4621	1.53696	44.7214	0.655995		297.488	707.697	7.1779	35.6464	119.668	183.924	402.628	264.122
Cell 12	40	2.50858	80	2.62763	63.2456	1.27585	63.2456	0.615128		341.27	856.104	29.2161	76.7692	222.377	283.72	312.001	191.921
Cell 12	44.7214	2.23878	82.4621	3.19185	44.7214	1.62372	82.4621	0.648262		317.007	709.71	24.8741	79.3945	227.749	369.8	175.721	113.914
Cell 12	56.5685	1.66988	89.4427	1.69879	28.2843	1.60073	101.98	0.5803		270.263	451.306	48.8767	83.0314	304.636	487.64	83.1337	48.2425
Cell 12	72.111	5.93604	72.111	21.2646	100	7.86244	20	1.05738		68.7666	408.201	9.04879	192.419	17.3311	136.265	451.706	477.627
Cell 12	63.2456	2.96562	63.2456	4.14447	80	3.07035	40	0.986205		157.956	468.439	43.4746	180.179	69.7431	214.136	439.16	433.102
Cell 12	60	2.7485	60	1.82946	60	1.64582	60	0.709656		205.203	564	84.0826	153.826	183.326	301.722	390.727	277.282
Cell 12	63.2456	1.3136	63.2456	1.20146	40	1.5793	80	0.884762		290.195	381.2	106.013	127.37	272.039	429.632	251.705	222.699
Cell 12	72.111	1.51085	72.111	1.57669	20	1.41725	100	0.843792		290.51	438.917	96.5851	152.285	352.207	499.164	122.298	103.194
Cell 12	89.4427	Inf	56.5685	1.65224	101.98	Inf	28.2843	1.41925		0	266.329	146.44	241.954	0	151.809	375.548	532.997
Cell 12	82.4621	29.0928	44.7214	2.24554	82.4621	19.714	44.7214	1.37672		14.3711	418.096	146.982	330.055	11.9884	236.34	401.502	552.754
Cell 12	80	4.71192	40	1.72244	63.2456	3.72699	63.2456	1.1289		98.3378	463.36	203.418	350.376	108.28	403.558	315.736	356.434
Cell 12	82.4621	2.7007	44.7214	1.29754	44.7214	1.96017	82.4621	1.1113		159.08	429.628	260.99	338.645	244.293	478.855	236.419	262.733
Cell 12	89.4427	2.30211	56.5685	1.0404	28.2843	1.43703	101.98	1.78263		208.13	479.138	229.43	238.699	393.771	565.861	122.243	217.914
Cell 12	107.703	Inf	44.7214	1.62372	107.703	Inf	44.7214	2.23878		0	232.737	227.749	369.8	0	113.3	317.007	709.71
Cell 12	101.98	Inf	28.2843	1.60073	89.4427	28.4894	56.5685	1.66988		0	217.971	304.636	487.64	6.84601	195.038	270.263	451.306
Cell 12	100	29.4673	20	1.41307	72.111	3.40006	72.111	1.99886		11.5636	340.747	344.001	486.099	77.8488	264.691	207.671	415.105
Cell 12	101.98	6.50658	28.2843	1.01938	56.5685	2.33533	89.4427	2.65389		49.8191	324.152	402.151	409.946	173.04	404.106	133.559	354.451
Cell 12	107.703	2.60652	44.7214	0.655995	44.7214	2.37891	107.703	8.07952		105.397	274.72	402.628	264.122	297.488	707.697	24.4337	197.412
Cell 13	101.98	0.927353	101.98	0.379977	141.421	1.61657	28.2843	0.866613		271.777	252.033	104.199	39.5933	23.9267	38.679	207.447	179.776
Cell 13	82.4621	0.681443	107.703	0.39624	128.062	0.529003	44.7214	1.57799		384.304	261.881	82.5048	32.6917	73.8845	39.0852	117.256	185.029
Cell 13	63.2456	0.813995	116.619	1.32321	116.619	0.637134	63.2456	3.02684		406.253	330.688	21.2887	28.1695	80.0793	51.0213	49.9709	151.254
Cell 13	44.7214	0.500197	128.062	Inf	107.703	0.447651	82.4621	31.1522		384.391	192.271	0	17.6449	105.476	47.2165	2.20047	68.5494
Cell 13	28.2843	0.657739	141.421	Inf	101.98	0.398923	101.98	Inf		346.101	227.644	0	33.1136	116.444	46.4523	0	31.0404
Cell 13	107.703	0.883649	82.4621	0.340395	128.062	0.676856	44.7214	1.26865		263.858	233.158	223.882	76.2083	65.3561	44.2367	138.789	176.075
Cell 13	89.4427	0.743375	89.4427	0.32672	113.137	0.365352	56.5685	2.99316		360.196	267.761	175.967	57.4919	145.342	53.101	47.0728	140.896
Cell 13	72.111	0.617366	100	0.310443	100	0.457352	72.111	16.237		409.404	252.752	110.153	34.1963	176.383	80.6692	6.09268	98.9269
Cell 13	56.5685	0.394195	113.137	1.8939	89.4427	0.464362	89.4427	Inf		332.446	131.049	16.6472	31.5282	219.664	102.003	0	78.7023
Cell 13	44.7214	0.50029	128.062	Inf	82.4621	0.391774	107.703	Inf		259.838	129.994	0	31.7393	226.389	88.693	0	46.4749
Cell 13	116.619	1.31046	63.2456	0.461237	116.619	0.390184	63.2456	3.9401		186.465	244.354	273.994	126.376	162.909	63.5644	41.6197	163.986
Cell 13	100	0.811033	72.111	0.326332	100	0.415646	72.111	Inf		272.563	221.057	262.206	85.5661	217.116	90.2436	0	133.931
Cell 13	84.8528	0.673088	84.8528	0.433014	84.8528	0.324715	84.8528	Inf		348.859	234.813	156.973	67.9715	288.38	93.6412	0	89.8839
Cell 13	72.111	0.744339	100	0.89882	72.111	0.54243	100	Inf		288.495	214.738	40.783	36.6566	298.92	162.143	0	51.0715
Cell 13	63.2456	0.883523	116.619	12.1712	63.2456	0.313429	116.619	Inf		223.909	197.829	2.24152	27.2819	315.254	98.8098	0	28.9989
Cell 13	128.062	3.65943	44.7214	0.618402	107.703	0.55507	82.4621	26.1691		70.9176	259.518	288.238	178.247	252.491	140.15	6.7255	176
Cell 13	113.137	1.79827	56.5685	0.39353	89.4427	0.451784	89.4427	Inf		168.907	303.741	288.609	113.577	277.36	125.307	0	163.761
Cell 13	100	1.16465	72.111	0.414096	72.111	0.447867	100	Inf		249.351	290.406	229.335	94.9668	319.105	142.916	0	76.777
Cell 13	89.4427	1.4082	89.4427	0.552589	56.5685	0.447226	113.137	Inf		215.058	302.846	66.2163	36.5904	288.378	128.97	0	69.6075
Cell 13	82.4621	1.1502	107.703	11.4218	44.7214	0.489783	128.062	Inf		166.907	191.976	2.40911	27.5164	283.438	138.823	0	26.0231
Cell 13	141.421	19.3503	28.2843	0.738418	101.98	0.783867	101.98	Inf		9.64681	186.669	222.789	164.512	271.808	213.061	0	116.706
Cell 13	128.062	1.6761	44.7214	0.752992	82.4621	0.72557	107.703	Inf		102.846	172.381	225.082	169.485	341.524	247.8	0	109.322
Cell 13	116.619	2.31092	63.2456	0.90005	63.2456	0.773737	116.619	Inf		115.734	267.453	149.343	134.416	328.868	254.457	0	66.0936
Cell 13	107.703	2.23228	82.4621	1.39889	44.7214	0.678839	128.062	Inf		122.567	273.605	71.3659	99.833	338.222	229.598	0	45.8931
Cell 13	101.98	3.02918	101.98	5.11338	28.2843	0.489191	141.421	Inf		69.514	210.57	6.66307	34.0708	344.188	168.374	0	28.6825
Cell 14	101.98	0.394361	101.98	3.38942	141.421	Inf	28.2843	0.273976		141.255	55.7053	6.99279	23.7015	0	24.7838	267.965	73.4159
Cell 14	82.4621	0.479283	107.703	Inf	128.062	Inf	44.7214	0.15579		243.079	116.504	0	19.6442	0	8.87629	205.096	31.9519
Cell 14	63.2456	1.16821	116.619	Inf	116.619	Inf	63.2456	0.192451		275.89	322.296	0	24.7439	0	27.298	131.259	25.2609
Cell 14	44.7214	1.40103	128.062	Inf	107.703	Inf	82.4621	0.39474		298.019	417.533	0	24.3652	0	19.9829	58.6052	23.1339
Cell 14	28.2843	1.13063	141.421	0.630041	101.98	1.21365	101.98	8.61989		333.527	377.097	6.18103	3.8943	20.7258	25.1539	2.76267	23.8139
Cell 14	107.703	0.391996	82.4621	0.350238	128.062	Inf	44.7214	1.03136		192.215	75.3476	74.9829	26.2619	0	38.1335	176.244	181.772
Cell 14	89.4427	0.809391	89.4427	0.234627	113.137	Inf	56.5685	0.457804		271.408	219.675	65.006	15.2522	0	20.846	122.925	56.2757
Cell 14	72.111	1.15191	100	0.239998	100	Inf	72.111	0.371888		330.94	381.214	79.0771	18.9784	0	22.4751	60.1939	22.3854
Cell 14	56.5685	1.45058	113.137	0.251007	89.4427	0.654019	89.4427	1.09917		329.924	478.58	62.5532	15.7013	36.7429	24.0306	32.5192	35.7442
Cell 14	44.7214	1.50196	128.062	1.11851	82.4621	0.279804	107.703	10.8578		322.917	485.008	29.5612	33.0645	76.8673	21.5078	1.91523	20.7952
Cell 14	116.619	0.421989	63.2456	0.113593	116.619	Inf	63.2456	1.75973		155.405	65.5792	202.637	23.0181	0	24.1402	152.94	269.132
Cell 14	100	0.628331	72.111	0.0948868	100	Inf	72.111	3.16789		287.74	180.796	239.227	22.6995	0	17.8902	48.9765	155.152
Cell 14	84.8528	1.2165	84.8528	0.128883	84.8528	8.29124	84.8528	Inf		352.793	429.174	207.501	26.7433	6.28232	52.0882	0	54.8307
Cell 14	72.111	1.06709	100	0.237969	72.111	0.284006	100	Inf		367.429	392.079	128.167	30.4998	84.8161	24.0883	0	24.6315
Cell 14	63.2456	1.32586	116.619	0.37104	63.2456	0.0379462	116.619	Inf		379.342	502.956	52.5056	19.4817	157.402	5.9728	0	16.4558
Cell 14	128.062	0.271661	44.7214	0.121122	107.703	Inf	82.4621	2.18871		165.519	44.9649	345.18	41.8088	0	62.1168	140.412	307.322
Cell 14	113.137	0.542507	56.5685	0.0792331	89.4427	1.75002	89.4427	5.65204		294.014	159.505	358.348	28.393	14.6565	25.6493	32.6877	184.752
Cell 14	100	0.840327	72.111	0.0699692	72.111	0.319964	100	Inf		372.04	312.635	283.571	19.8413	66.0199	21.124	0	65.9256
Cell 14	89.4427	0.936993	89.4427	0.0993994	56.5685	0.344984	113.137	Inf		420.318	393.835	165.143	16.4152	160.921	55.515	0	33.5808
Cell 14	82.4621	0.978401	107.703	0.266507	44.7214	0.158276	128.062	Inf		403.197	394.489	49.9367	13.3085	242.418	38.369	0	26.0801
Cell 14	141.421	0.209459	28.2843	0.0565386	101.98	Inf	101.98	3.80281		191.378	40.0859	338.384	19.1317	0	26.8631	74.2952	282.531
Cell 14	128.062	0.21825	44.7214	0.0624023	82.4621	0.941221	107.703	Inf		311.436	67.971	340.388	21.241	47.0347	44.2701	0	127.782
Cell 14	116.619	0.353257	63.2456	0.1075	63.2456	0.420461	116.619	Inf		353.668	124.936	214.116	23.0174	111.853	47.0296	0	60.2208
Cell 14	107.703	0.682459	82.4621	0.141147	44.7214	0.291523	128.062	Inf		356.448	243.261	91.7765	12.9539	196.099	57.1676	0	28.2789
Cell 14	101.98	0.695663	101.98	3.62132	28.2843	0.221909	141.421	Inf		328.929	228.824	27.0632	98.0044	325.919	72.3244	0	16.5265
Cell 15	28.2843	0.540169	141.421	Inf	101.98	Inf	101.98	0.544224		376.662	203.461	0	37.1087	0	36.4726	78.0766	42.4912
Cell 15	44.7214	0.77667	128.062	Inf	82.4621	4.10551	107.703	0.288333		315.48	245.024	0	18.9712	24.2787	99.6767	129.52	37.345
Cell 15	63.2456	0.800637	116.619	Inf	63.2456	1.05024	116.619	0.278406		302.301	242.034	0	27.2214	123.724	129.939	122.154	34.0085
Cell 15	82.4621	1.02511	107.703	1.92406	44.7214	0.825903	128.062	0.767429		209.787	215.055	16.1526	31.0785	240.318	198.479	48.1181	36.9272
Cell 15	101.98	2.32449	101.98	0.671052	28.2843	0.598153	141.421	Inf		102.397	238.021	49.723	33.3667	318.737	190.654	0	32.8879
Cell 15	44.7214	0.723534	128.062	Inf	107.703	Inf	82.4621	0.326292		306.184	221.535	0	37.5816	0	35.3601	204.775	66.8165
Cell 15	56.5685	1.33552	113.137	6.82911	89.4427	1.97804	89.4427	0.259684		220.176	294.049	4.46382	30.4839	50.4099	99.7129	283.503	73.621
Cell 15	72.111	0.881655	100	1.2194	72.111	0.903355	100	0.286049		211.428	186.407	21.7923	26.5736	161.85	146.208	209.166	59.8318
Cell 15	89.4427	1.19219	89.4427	0.694019	56.5685	0.938784	113.137	0.421691		171.716	204.719	41.829	29.0301	217.658	204.334	104.012	43.8607
Cell 15	107.703	3.06928	82.4621	0.387944	44.7214	0.960037	128.062	28.3204		86.4195	265.246	98.8218	38.3373	217.502	208.81	0.884484	25.049
Cell 15	63.2456	0.828823	116.619	Inf	116.619	Inf	63.2456	0.37649		247.097	204.8	0	32.3983	0	39.5391	274.913	103.502
Cell 15	72.111	0.647954	100	0.960759	100	0.984725	72.111	0.299305		242.257	156.971	31.5433	30.3055	59.5429	58.6334	326.593	97.7509
Cell 15	84.8528	1.59894	84.8528	0.490467	84.8528	1.09978	84.8528	0.342285		150.541	240.706	79.0245	38.7589	132.156	145.343	305.817	104.677
Cell 15	100	1.40459	72.111	0.412408	72.111	1.70806	100	0.556769		158.225	222.24	128.439	52.9694	168.711	288.169	148.243	82.5368
Cell 15	116.619	5.22676	63.2456	0.506083	63.2456	2.71011	116.619	1.2182		40.9726	214.154	164.308	83.1535	105.302	285.38	36.0027	43.8585
Cell 15	82.4621	0.997852	107.703	Inf	128.062	Inf	44.7214	0.380786		243.238	242.716	0	28.9001	0	26.9826	283.742	108.045
Cell 15	89.4427	1.07854	89.4427	0.891243	113.137	3.82054	56.5685	0.344674		154.23	166.343	48.6354	43.346	21.2146	81.0512	333.538	114.962
Cell 15	100	1.79528	72.111	0.37017	100	2.92839	72.111	0.447578		124.306	223.163	129.646	47.9913	64.4667	188.784	320.168	143.3
Cell 15	113.137	1.23207	56.5685	0.452895	89.4427	6.3184	89.4427	0.808566		128.578	158.417	203.173	92.0158	47.1412	297.857	193.657	156.584
Cell 15	128.062	2.39988	44.7214	0.511188	82.4621	5.13535	107.703	1.09185		57.0066	136.809	226.124	115.592	54.0713	277.675	87.2238	95.2353
Cell 15	101.98	0.822538	101.98	Inf	141.421	Inf	28.2843	0.545183		211.847	174.253	0	30.662	0	42.2634	331.302	180.62
Cell 15	107.703	1.87794	82.4621	3.39623	128.062	Inf	44.7214	0.471154		115.085	216.123	17.6316	59.8812	0	68.03	396.115	186.631
Cell 15	116.619	1.69299	63.2456	0.684175	116.619	11.6187	63.2456	0.503915		110.7	187.414	115.542	79.0512	15.1481	176.001	409.034	206.118
Cell 15	128.062	1.5842	44.7214	0.514985	107.703	9.87941	82.4621	0.574863		93.8706	148.709	267.267	137.639	23.1471	228.68	277.89	159.749
Cell 15	141.421	1.68939	28.2843	0.624381	101.98	3.3693	101.98	1.06533		59.6891	100.838	282.637	176.473	78.9102	265.873	128.61	137.012
Cell 16	44.7214	0.861719	107.703	0.767316	107.703	1.56725	44.7214	0.851361		392.662	338.365	167.094	128.214	43.6231	68.3681	378.441	322.19
Cell 16	28.2843	0.899689	101.98	0.457898	89.4427	1.31787	56.5685	0.984995		403.677	363.184	231.443	105.977	85.0559	112.092	367.138	361.629
Cell 16	20	1.66163	100	0.800743	72.111	1.06818	72.111	1.22802		321.885	534.854	223.248	178.764	237.158	253.327	232.204	285.152
Cell 16	28.2843	1.81051	101.98	0.526064	56.5685	0.990849	89.4427	1.1804		237.576	430.133	237.336	124.854	320.561	317.627	129.289	152.612
Cell 16	44.7214	1.5731	107.703	0.63388	44.7214	1.01152	107.703	2.34518		191.92	301.91	205.769	130.433	356.583	360.692	43.0739	101.016
Cell 16	56.5685	0.824622	89.4427	0.679946	101.98	0.536254	28.2843	1.27268		295.815	243.935	283.139	192.52	112.87	60.5269	332.852	423.615
Cell 16	44.7214	1.53002	82.4621	0.955889	82.4621	0.625349	44.7214	1.18107		287.544	439.947	256.891	245.559	186.842	116.841	313.812	370.634
Cell 16	40	1.76913	80	0.789603	63.2456	0.698031	63.2456	0.873157		212.649	376.202	280	221.089	312.671	218.254	231.118	201.802
Cell 16	44.7214	1.92974	82.4621	0.685185	44.7214	0.789586	82.4621	1.51353		191.228	369.02	312.054	213.815	356.227	281.271	106.971	161.904
Cell 16	56.5685	1.99846	89.4427	0.627289	28.2843	0.952403	101.98	1.76046		138.917	277.62	273.36	171.476	410.019	390.503	62.3935	109.841
Cell 16	72.111	0.924193	72.111	0.838792	100	0.499882	20	1.25989		228.31	211.002	323.211	271.107	170.524	85.2417	299.978	377.939
Cell 16	63.2456	1.61547	63.2456	0.749091	80	0.458311	40	1.13075		176.374	284.927	354.216	265.34	280.229	128.432	263.254	297.674
Cell 16	60	1.33971	60	1.00009	60	0.627378	60	0.90181		118.959	159.37	321.535	321.563	335.759	210.648	169.959	153.271
Cell 16	63.2456	1.39345	63.2456	0.711761	40	0.809347	80	2.25017		116.627	162.513	367.707	261.72	442.465	358.108	92.9759	209.212
Cell 16	72.111	3.27086	72.111	0.646048	20	0.860488	100	1.62457		77.8008	254.476	353.337	228.273	448.951	386.317	57.6578	93.669
Cell 16	89.4427	0.935589	56.5685	0.990849	101.98	0.52198	28.2843	1.81051		191.175	178.861	320.561	317.627	198.761	103.75	237.576	430.133
Cell 16	82.4621	2.07038	44.7214	1.01152	82.4621	0.383612	44.7214	1.5731		134.288	278.028	356.583	360.692	276.166	105.941	191.92	301.91
Cell 16	80	1.68248	40	0.952716	63.2456	0.478945	63.2456	2.43021		110.801	186.42	351.536	334.914	328.206	157.193	86.3627	209.88
Cell 16	82.4621	2.88795	44.7214	0.851361	44.7214	0.861719	82.4621	3.59033		48.4409	139.895	378.441	322.19	392.662	338.365	37.119	133.269
Cell 16	89.4427	5.32093	56.5685	0.984995	28.2843	0.899689	101.98	Inf		33.3452	177.427	367.138	361.629	403.677	363.184	0	88.9897
Cell 16	107.703	2.21051	44.7214	0.789586	107.703	0.545961	44.7214	1.92974		110.052	243.271	356.227	281.271	174.811	95.4397	191.228	369.02
Cell 16	101.98	2.44372	28.2843	0.952403	89.4427	0.506226	56.5685	1.99846		102.574	250.664	410.019	390.503	250.88	127.002	138.917	277.62
Cell 16	100	3.13941	20	0.897692	72.111	0.722758	72.111	5.79505		64.0365	201.037	392.55	352.389	280.118	202.458	44.6445	258.717
Cell 16	101.98	14.1818	28.2843	1.27268	56.5685	0.824622	89.4427	Inf		11.6756	165.582	332.852	423.615	295.815	243.935	0	173.164
Cell 16	107.703	Inf	44.7214	1.18107	44.7214	1.53002	107.703	Inf		0	221.564	313.812	370.634	287.544	439.947	0	78.5034

## Sheet: D
On	Distance Pref side	Pref amp/dend len	Distance Null side	Null amp/dend len	Distance Pref + 90	Pref + 90 amp/dend len	Distance Pref -90	Pref-90 amp/den len		Pref den len	Pref amp	Null den len	Null amp	Pref + 90 len	Pref + 90 amp	Pref -90 len	Pref-90 amp
Cell 1	44.7214	1.92999	107.703	Inf	107.703	0.501875	44.7214	0.759334		301.043	581.01	0	28.2058	73.5332	36.9045	373.292	283.453
Cell 1	28.2843	1.54961	101.98	1.00207	89.4427	0.202598	56.5685	0.570234		323.082	500.651	42.2433	42.3309	182.024	36.8777	310.045	176.798
Cell 1	20	1.08527	100	0.490437	72.111	0.432166	72.111	0.741323		304.34	330.291	68.3674	33.5299	240.147	103.783	188.592	139.808
Cell 1	28.2843	1.15203	101.98	0.30711	56.5685	0.662224	89.4427	0.594917		259.44	298.884	132.06	40.557	286.453	189.696	59.8982	35.6345
Cell 1	44.7214	1.12153	107.703	0.667568	44.7214	1.16121	107.703	4.53647		227.29	254.912	113.621	75.85	327.81	380.656	5.48742	24.8935
Cell 1	56.5685	2.03668	89.4427	9.80976	101.98	1.02599	28.2843	1.16819		275.194	560.482	5.1334	50.3574	80.9127	83.0159	331.125	386.817
Cell 1	44.7214	1.96969	82.4621	1.21606	82.4621	0.645848	44.7214	0.58791		327.019	644.127	76.9739	93.6046	205.481	132.71	242.277	142.437
Cell 1	40	1.90725	80	0.691771	63.2456	0.823933	63.2456	0.660956		280.566	535.11	169.972	117.582	306.738	252.731	165.312	109.264
Cell 1	44.7214	1.18436	82.4621	0.460953	44.7214	1.06117	82.4621	0.741317		261.267	309.433	270.345	124.616	375.191	398.141	59.743	44.2885
Cell 1	56.5685	1.91803	89.4427	0.349813	28.2843	1.37094	101.98	2.53935		188.844	362.207	278.504	97.4241	375.456	514.729	11.7217	29.7655
Cell 1	72.111	2.24068	72.111	0.639195	100	2.36625	20	1.11267		278.362	623.722	147.82	94.4861	66.965	158.456	270.885	301.406
Cell 1	63.2456	2.155	63.2456	1.21268	80	1.47047	40	0.639326		319.743	689.048	194.11	235.393	204.362	300.507	201.482	128.813
Cell 1	60	1.26144	60	0.835062	60	1.22501	60	0.728275		335.134	422.753	301.905	252.11	246.325	301.751	154.818	112.75
Cell 1	63.2456	1.09418	63.2456	0.559565	40	1.63425	80	1.01916		285.408	312.287	377.902	211.46	295.267	482.541	66.7657	68.0449
Cell 1	72.111	1.17109	72.111	0.418049	20	1.65978	100	2.65298		161.498	189.129	353.77	147.893	338.585	561.978	13.3171	35.33
Cell 1	89.4427	1.80323	56.5685	0.662224	101.98	1.90863	28.2843	1.15203		255.445	460.626	286.453	189.696	102.387	195.418	259.44	298.884
Cell 1	82.4621	2.07836	44.7214	1.16121	82.4621	2.09296	44.7214	1.12153		251.547	522.805	327.81	380.656	143.999	301.384	227.29	254.912
Cell 1	80	1.49128	40	1.10943	63.2456	1.88964	63.2456	1.30381		276.153	411.822	383.855	425.858	232.539	439.414	145.392	189.564
Cell 1	82.4621	1.50348	44.7214	0.759334	44.7214	1.92999	82.4621	1.6035		220.334	331.267	373.292	283.453	301.043	581.01	68.0603	109.135
Cell 1	89.4427	2.22099	56.5685	0.570234	28.2843	1.54961	101.98	2.82946		121.916	270.774	310.045	176.798	323.082	500.651	14.1201	39.9523
Cell 1	107.703	2.10172	44.7214	1.06117	107.703	1.44364	44.7214	1.18436		183.344	385.338	375.191	398.141	87.3589	126.115	261.267	309.433
Cell 1	101.98	1.75381	28.2843	1.37094	89.4427	1.38116	56.5685	1.91803		222.319	389.905	375.456	514.729	159.797	220.706	188.844	362.207
Cell 1	100	1.88467	20	0.941094	72.111	1.56348	72.111	2.13589		177.453	334.44	378.729	356.42	225.826	353.074	97.9561	209.224
Cell 1	101.98	2.85154	28.2843	1.16819	56.5685	2.03668	89.4427	2.7061		97.4604	277.913	331.125	386.817	275.194	560.482	45.2871	122.551
Cell 1	107.703	4.9802	44.7214	0.58791	44.7214	1.96969	107.703	12.0498		32.905	163.874	242.277	142.437	327.019	644.127	5.82633	70.2064
Cell 2	101.98	3.80657	101.98	0.864484	141.421	Inf	28.2843	0.391061		11.3829	43.3297	59.8136	51.7079	0	31.8577	182.209	71.2549
Cell 2	82.4621	0.687794	107.703	0.543195	128.062	Inf	44.7214	1.19676		99.6641	68.5484	72.5891	39.43	0	29.65	41.6304	49.8218
Cell 2	63.2456	0.564793	116.619	0.981506	116.619	Inf	63.2456	Inf		160.887	90.8676	39.1406	38.4167	0	33.3816	0	40.7098
Cell 2	44.7214	0.522428	128.062	Inf	107.703	Inf	82.4621	Inf		208.007	108.669	0	28.1313	0	42.424	0	37.746
Cell 2	28.2843	0.441384	141.421	Inf	101.98	3.21314	101.98	Inf		276.949	122.241	0	25.5915	14.1208	45.3721	0	20.8255
Cell 2	107.703	1.39294	82.4621	0.560569	128.062	Inf	44.7214	0.446912		34.1663	47.5917	132.722	74.3999	0	37.7867	275.911	123.308
Cell 2	89.4427	0.517058	89.4427	0.342989	113.137	Inf	56.5685	0.73826		150.09	77.6052	154.668	53.0494	0	33.2976	115.381	85.1815
Cell 2	72.111	0.388438	100	0.520173	100	2.25495	72.111	36.3077		244.676	95.0416	105.916	55.0944	20.7259	46.7359	1.24022	45.0295
Cell 2	56.5685	0.378612	113.137	1.42379	89.4427	0.775407	89.4427	Inf		318.294	120.51	29.5909	42.1313	70.949	55.0143	0	28.6117
Cell 2	44.7214	0.358908	128.062	Inf	82.4621	0.769943	107.703	Inf		376.256	135.041	0	31.6858	78.8665	60.7228	0	31.2815
Cell 2	116.619	0.776293	63.2456	0.44568	116.619	Inf	63.2456	0.43424		59.2316	45.9811	223.005	99.3889	0	41.3516	343.592	149.201
Cell 2	100	0.559956	72.111	0.32928	100	6.251	72.111	0.718381		184.496	103.31	282.97	93.1764	8.99365	56.2193	179.38	128.863
Cell 2	84.8528	0.375014	84.8528	0.296788	84.8528	1.65397	84.8528	2.71061		282.969	106.117	184.397	54.7269	33.1462	54.8227	28.5793	77.4674
Cell 2	72.111	0.393087	100	0.530801	72.111	0.792073	100	Inf		333.837	131.227	85.6443	45.46	114.991	91.0815	0	40.3606
Cell 2	63.2456	0.310019	116.619	13.0396	63.2456	0.667477	116.619	Inf		469.795	145.646	2.76828	36.0974	148.942	99.4151	0	33.2268
Cell 2	128.062	0.673355	44.7214	0.388151	107.703	Inf	82.4621	0.575242		81.3256	54.761	300.992	116.83	0	40.5037	316.418	182.017
Cell 2	113.137	0.492599	56.5685	0.337403	89.4427	10.166	89.4427	0.634056		203.784	100.384	270.459	91.2535	5.6643	57.5831	176.32	111.797
Cell 2	100	0.418329	72.111	0.243232	72.111	1.58661	100	1.0699		287.55	120.29	188.459	45.8394	55.1256	87.4627	73.0356	78.1408
Cell 2	89.4427	0.450285	89.4427	0.392499	56.5685	0.818942	113.137	5.39459		343.601	154.718	106.505	41.8032	125.591	102.851	8.70557	46.9629
Cell 2	82.4621	0.507269	107.703	1.01279	44.7214	0.420125	128.062	Inf		394.05	199.889	41.051	41.5761	216.409	90.9188	0	31.754
Cell 2	141.421	0.876222	28.2843	0.27337	101.98	Inf	101.98	0.882915		64.3737	56.4057	302.288	82.6363	0	31.8551	187.734	165.753
Cell 2	128.062	0.527058	44.7214	0.243839	82.4621	Inf	107.703	0.973205		134.885	71.0922	219.782	53.5915	0	52.0689	109.763	106.822
Cell 2	116.619	0.50511	63.2456	0.288069	63.2456	3.06152	116.619	1.82205		199.638	100.839	140.181	40.3816	28.1637	86.2236	51.337	93.5387
Cell 2	107.703	0.571706	82.4621	0.647804	44.7214	2.22594	128.062	2.76034		242.563	138.674	61.8803	40.0863	46.1399	102.704	15.3558	42.3873
Cell 2	101.98	0.500443	101.98	0.83806	28.2843	0.521094	141.421	Inf		280.06	140.154	37.6393	31.544	205.426	107.046	0	34.4173
Cell 3	44.7214	0.61903	107.703	Inf	107.703	1.45164	44.7214	0.480126		314.848	194.9	0	27.6401	15.8002	22.9362	198.484	95.2973
Cell 3	28.2843	0.579107	101.98	Inf	89.4427	0.43547	56.5685	0.454674		354.672	205.393	0	24.7374	63.8203	27.7918	189.059	85.9601
Cell 3	20	0.478063	100	Inf	72.111	0.308027	72.111	0.789809		363.085	173.578	0	25.3636	137.133	42.2405	95.7617	75.6335
Cell 3	28.2843	0.46089	101.98	2.7824	56.5685	0.258976	89.4427	1.15476		326.104	150.298	9.84165	27.3834	268.137	69.441	25.7415	29.7252
Cell 3	44.7214	0.386298	107.703	3.75463	44.7214	0.372579	107.703	Inf		322.193	124.463	5.61932	21.0985	246.225	91.7382	0	24.0238
Cell 3	56.5685	0.519857	89.4427	0.501795	101.98	0.75971	28.2843	0.488436		331.014	172.08	36.1173	18.1235	42.233	32.0848	236.566	115.547
Cell 3	44.7214	0.744881	82.4621	0.71215	82.4621	0.280109	44.7214	0.463799		351.366	261.726	46.1383	32.8574	127.384	35.6812	255.435	118.47
Cell 3	40	0.420432	80	0.950014	63.2456	0.462768	63.2456	0.647647		354.738	149.143	23.8612	22.6685	215.144	99.5619	175.305	113.535
Cell 3	44.7214	0.294616	82.4621	0.740131	44.7214	0.522876	82.4621	0.539452		342.219	100.823	35.9484	26.6065	287.964	150.569	100.259	54.085
Cell 3	56.5685	0.283895	89.4427	1.04585	28.2843	0.781203	101.98	2.06824		385.037	109.31	25.7828	26.965	285.832	223.293	16.6853	34.5091
Cell 3	72.111	0.827779	72.111	0.257001	100	0.303592	20	0.380964		256.314	212.172	128.073	32.9151	113.25	34.3819	302.667	115.305
Cell 3	63.2456	0.529679	63.2456	0.43648	80	0.578389	40	0.52715		378.59	200.531	111.081	48.4845	156.314	90.4105	264.149	139.246
Cell 3	60	0.484177	60	0.29804	60	0.520974	60	0.462396		375.965	182.034	138.513	41.2824	257.983	134.402	226.753	104.85
Cell 3	63.2456	0.319538	63.2456	0.446879	40	0.774282	80	0.56226		377.596	120.656	100.655	44.9806	273.192	211.527	149.933	84.3014
Cell 3	72.111	0.23369	72.111	0.402648	20	0.488115	100	0.67805		387.825	90.631	88.4131	35.5994	358.557	175.017	60.8496	41.2591
Cell 3	89.4427	0.543418	56.5685	0.258976	101.98	0.321805	28.2843	0.46089		196.925	107.012	268.137	69.441	121.834	39.207	326.104	150.298
Cell 3	82.4621	0.457804	44.7214	0.372579	82.4621	0.259558	44.7214	0.386298		332.842	152.376	246.225	91.7382	203.454	52.808	322.193	124.463
Cell 3	80	0.412548	40	0.425148	63.2456	0.626873	63.2456	0.334152		381.176	157.253	220.108	93.5786	270.874	169.803	327.531	109.445
Cell 3	82.4621	0.208437	44.7214	0.480126	44.7214	0.61903	82.4621	0.486605		402.069	83.806	198.484	95.2973	314.848	194.9	218.425	106.287
Cell 3	89.4427	0.509358	56.5685	0.454674	28.2843	0.579107	101.98	0.661971		355.03	180.837	189.059	85.9601	354.672	205.393	94.4621	62.5312
Cell 3	107.703	0.518101	44.7214	0.522876	107.703	0.419402	44.7214	0.294616		132.023	68.4012	287.964	150.569	124.999	52.4247	342.219	100.823
Cell 3	101.98	0.235315	28.2843	0.781203	89.4427	0.455929	56.5685	0.283895		275.857	64.9135	285.832	223.293	229.674	104.715	385.037	109.31
Cell 3	100	0.22889	20	0.515789	72.111	0.558884	72.111	0.275749		351.276	80.4035	301.422	155.47	271.727	151.864	363.611	100.265
Cell 3	101.98	0.313989	28.2843	0.488436	56.5685	0.519857	89.4427	0.609318		298.065	93.589	236.566	115.547	331.014	172.08	219.648	133.836
Cell 3	107.703	0.552303	44.7214	0.463799	44.7214	0.744881	107.703	0.566388		256.292	141.551	255.435	118.47	351.366	261.726	78.7096	44.5802
Cell 4	44.7214	0.402573	107.703	0.3742	107.703	1.58302	44.7214	0.146818		389.102	156.642	129.121	48.3171	40.4164	63.9799	430.689	63.2329
Cell 4	28.2843	0.78011	101.98	0.243717	89.4427	0.837464	56.5685	0.117829		281.027	219.232	189.666	46.2248	106.302	89.0244	408.167	48.094
Cell 4	20	0.394709	100	0.226071	72.111	0.46972	72.111	0.148293		294.968	116.426	211.608	47.8384	256.852	120.648	339.71	50.3765
Cell 4	28.2843	0.298267	101.98	0.232634	56.5685	0.735404	89.4427	0.233868		289.709	86.4106	223.049	51.8887	289.502	212.901	127.656	29.8547
Cell 4	44.7214	0.330251	107.703	0.292129	44.7214	0.351259	107.703	1.57373		320.118	105.719	195.393	57.08	338.596	118.935	14.9739	23.565
Cell 4	56.5685	0.38471	89.4427	0.427871	101.98	0.694523	28.2843	0.240202		360.153	138.554	211.244	90.3851	117.091	81.3227	330.536	79.3955
Cell 4	44.7214	0.530475	82.4621	0.375908	82.4621	0.746392	44.7214	0.12466		255.742	135.665	275.837	103.689	170.905	127.562	406.219	50.6392
Cell 4	40	0.604233	80	0.158981	63.2456	0.608114	63.2456	0.0768919		180.857	109.28	319.979	50.8706	274.59	166.982	351.554	27.0317
Cell 4	44.7214	0.486897	82.4621	0.220014	44.7214	0.68646	82.4621	0.160188		185.004	90.0779	297.136	65.3741	292.019	200.459	168.463	26.9858
Cell 4	56.5685	0.226363	89.4427	0.188566	28.2843	0.654351	101.98	0.5074		254.8	57.6774	287.661	54.2432	284.539	186.188	46.6732	23.682
Cell 4	72.111	0.577579	72.111	0.36758	100	0.740494	20	0.329409		242.804	140.239	234.989	86.3774	126.919	93.9829	328.339	108.158
Cell 4	63.2456	0.652882	63.2456	0.30048	80	0.41253	40	0.14208		184.901	120.719	318.342	95.6551	285.207	117.656	348.977	49.5826
Cell 4	60	0.861241	60	0.197345	60	0.473975	60	0.133961		104.693	90.1655	343	67.6893	329.798	156.316	300.406	40.2425
Cell 4	63.2456	1.0035	63.2456	0.145118	40	0.712202	80	0.200414		59.542	59.7507	356.578	51.7458	301.414	214.668	194.753	39.0314
Cell 4	72.111	0.559453	72.111	0.132724	20	0.632559	100	0.479394		91.1972	51.0205	383.766	50.935	287.721	182	58.6919	28.1365
Cell 4	89.4427	0.910787	56.5685	0.735404	101.98	0.405516	28.2843	0.298267		119.782	109.096	289.502	212.901	286.645	116.239	289.709	86.4106
Cell 4	82.4621	0.976667	44.7214	0.351259	82.4621	0.564883	44.7214	0.330251		96.3086	94.0614	338.596	118.935	332.602	187.881	320.118	105.719
Cell 4	80	2.64308	40	0.270775	63.2456	0.521149	63.2456	0.0966698		31.9605	84.4742	370.213	100.245	430.582	224.397	316.351	30.5816
Cell 4	82.4621	Inf	44.7214	0.146818	44.7214	0.402573	82.4621	0.111795		0	54.2722	430.689	63.2329	389.102	156.642	202.592	22.6488
Cell 4	89.4427	Inf	56.5685	0.117829	28.2843	0.78011	101.98	0.561006		0	23.731	408.167	48.094	281.027	219.232	48.5389	27.2306
Cell 4	107.703	2.2326	44.7214	0.68646	107.703	0.3892	44.7214	0.486897		37.3738	83.4406	292.019	200.459	357.949	139.314	185.004	90.0779
Cell 4	101.98	2.11052	28.2843	0.654351	89.4427	0.519443	56.5685	0.226363		32.4884	68.5673	284.539	186.188	363.184	188.653	254.8	57.6774
Cell 4	100	4.57342	20	0.534153	72.111	0.435153	72.111	0.165434		10.1272	46.3158	324.729	173.455	380.933	165.764	197.171	32.6189
Cell 4	101.98	Inf	28.2843	0.240202	56.5685	0.38471	89.4427	0.248307		0	54.2759	330.536	79.3955	360.153	138.554	121.503	30.17
Cell 4	107.703	Inf	44.7214	0.12466	44.7214	0.530475	107.703	1.31632		0	28.0839	406.219	50.6392	255.742	135.665	23.011	30.2898
Cell 5	101.98	0.669971	101.98	1.56327	141.421	Inf	28.2843	0.725667		32.0957	21.5032	19.5567	30.5724	0	18.3744	300.754	218.248
Cell 5	82.4621	0.405866	107.703	3.44669	128.062	Inf	44.7214	1.883		101.001	40.9928	10.3887	35.8067	0	19.1321	210.241	395.885
Cell 5	63.2456	0.228626	116.619	Inf	116.619	Inf	63.2456	1.20165		214.174	48.9659	0	37.7604	0	19.506	264.68	318.052
Cell 5	44.7214	0.215388	128.062	1.13614	107.703	Inf	82.4621	1.23255		285.78	61.5536	27.0309	30.7109	0	19.2643	271.841	335.059
Cell 5	28.2843	0.300206	141.421	1.39977	101.98	1.20305	101.98	1.172		306.072	91.8844	20.3026	28.419	19.2361	23.1419	279.477	327.547
Cell 5	107.703	12.6385	82.4621	0.670394	128.062	9.95415	44.7214	0.964031		1.75928	22.2347	122.043	81.817	1.97364	19.6459	309.358	298.23
Cell 5	89.4427	0.694742	89.4427	0.796756	113.137	0.522043	56.5685	1.60987		37.0895	25.7676	96.3147	76.7394	35.0217	18.2828	230.56	371.171
Cell 5	72.111	0.215048	100	0.854776	100	0.459806	72.111	2.40489		159.568	34.3147	130.938	111.922	39.8257	18.3121	182.261	438.318
Cell 5	56.5685	0.217691	113.137	0.970644	89.4427	2.951	89.4427	1.70355		188.046	40.9361	105.852	102.745	5.7302	16.9098	159.185	271.18
Cell 5	44.7214	0.25806	128.062	1.53423	82.4621	0.460898	107.703	0.588264		250.471	64.6365	77.3591	118.687	70.1299	32.3227	184.654	108.625
Cell 5	116.619	Inf	63.2456	0.710011	116.619	1.09789	63.2456	0.82437		0	21.0217	262.567	186.426	23.2696	25.5475	241.395	198.999
Cell 5	100	3.62897	72.111	0.832902	100	0.423989	72.111	1.14563		6.12172	22.2156	263.901	219.804	52.4212	22.226	232.093	265.892
Cell 5	84.8528	0.52709	84.8528	0.727346	84.8528	0.349411	84.8528	1.76755		47.6175	25.0987	301.006	218.935	74.5107	26.0349	134.495	237.728
Cell 5	72.111	0.650406	100	1.4142	72.111	0.487719	100	1.70083		63.5867	41.3572	242.189	342.504	102.109	49.8007	115.573	196.57
Cell 5	63.2456	0.540093	116.619	1.407	63.2456	0.531033	116.619	1.76514		83.769	45.2431	196.627	276.654	125.225	66.4984	78.6363	138.804
Cell 5	128.062	Inf	44.7214	0.728551	107.703	0.905253	82.4621	0.423176		0	18.2381	345.71	251.867	27.237	24.6564	115.613	48.9246
Cell 5	113.137	Inf	56.5685	0.748423	89.4427	0.247813	89.4427	0.626136		0	17.4021	381.701	285.674	114.111	28.2781	130.292	81.5806
Cell 5	100	2.46478	72.111	0.632239	72.111	0.326067	100	1.9642		8.18677	20.1786	370.924	234.512	175.72	57.2963	69.8567	137.212
Cell 5	89.4427	3.12553	89.4427	0.997415	56.5685	0.360934	113.137	2.91411		10.2637	32.0795	349.756	348.852	182.588	65.9022	44.9644	131.031
Cell 5	82.4621	Inf	107.703	1.66206	44.7214	1.54645	128.062	7.80021		0	29.3705	241.104	400.73	238.169	368.316	11.8653	92.5521
Cell 5	141.421	Inf	28.2843	0.984566	101.98	0.382388	101.98	1.58113		0	16.3476	307.869	303.117	60.6249	23.1823	13.8171	21.8466
Cell 5	128.062	Inf	44.7214	0.36498	82.4621	0.264931	107.703	1.60767		0	15.8528	381.411	139.207	112.925	29.9174	20.7817	33.41
Cell 5	116.619	Inf	63.2456	0.237364	63.2456	0.297837	116.619	1.143		0	19.3333	374.685	88.9369	206.404	61.4747	33.2516	38.0067
Cell 5	107.703	Inf	82.4621	0.703185	44.7214	1.43138	128.062	6.24985		0	18.8747	360.449	253.463	245.675	351.655	10.5762	66.0998
Cell 5	101.98	Inf	101.98	1.32945	28.2843	1.4749	141.421	Inf		0	20.0208	265.404	352.841	249.59	368.12	0	30.3548
Cell 6	44.7214	1.2854	107.703	Inf	107.703	4.92483	44.7214	1.03672		133.842	172.04	0	47.1459	5.93841	29.2457	232.613	241.155
Cell 6	28.2843	1.0446	101.98	5.91436	89.4427	0.524222	56.5685	1.30705		189.937	198.408	5.79997	34.3031	61.5521	32.2669	234.318	306.265
Cell 6	20	0.990822	100	3.35123	72.111	0.339503	72.111	1.07578		213.172	211.216	17.6047	58.9974	106.459	36.1432	274.049	294.815
Cell 6	28.2843	0.849142	101.98	3.38448	56.5685	0.765224	89.4427	1.40919		249.427	211.799	20.8163	70.4521	138.777	106.195	208.106	293.261
Cell 6	44.7214	1.22463	107.703	2.22617	44.7214	0.99573	107.703	1.30152		211.904	259.505	34.9511	77.8071	193.707	192.88	193.971	252.456
Cell 6	56.5685	1.0734	89.4427	Inf	101.98	1.1271	28.2843	0.893973		154.32	165.648	0	33.033	22.8601	25.7656	265.727	237.553
Cell 6	44.7214	1.42523	82.4621	1.204	82.4621	0.467099	44.7214	1.09969		141.422	201.559	51.4851	61.9883	81.0488	37.8578	213.147	234.395
Cell 6	40	1.32023	80	0.90975	63.2456	0.637747	63.2456	1.36842		163.33	215.632	95.48	86.8629	121.537	77.5099	193.169	264.335
Cell 6	44.7214	0.717574	82.4621	1.01089	44.7214	0.609852	82.4621	1.07971		211.377	151.678	85.8198	86.7542	205.721	125.459	202.918	219.093
Cell 6	56.5685	0.898858	89.4427	1.25478	28.2843	0.895692	101.98	1.42557		186.654	167.776	118.675	148.912	220.949	197.902	210.928	300.694
Cell 6	72.111	1.22489	72.111	0.68547	100	1.51854	20	0.992256		118.254	144.848	88.4188	60.6085	33.952	51.5576	252.305	250.351
Cell 6	63.2456	1.66295	63.2456	0.784012	80	0.737932	40	1.16916		125.862	209.302	123.472	96.8037	114.248	84.3073	204.097	238.622
Cell 6	60	1.16303	60	0.769985	60	0.536494	60	1.41476		116.028	134.944	190.368	146.58	182.316	97.8113	220.465	311.904
Cell 6	63.2456	1.09395	63.2456	0.731267	40	0.964139	80	1.48136		177.95	194.668	229.377	167.736	153.764	148.25	247.436	366.541
Cell 6	72.111	1.03308	72.111	0.63772	20	1.19637	100	1.30461		196.03	202.515	209.855	133.829	210.238	251.523	264.798	345.458
Cell 6	89.4427	1.68497	56.5685	0.765224	101.98	0.836905	28.2843	0.849142		110.277	185.813	138.777	106.195	52.0519	43.5625	249.427	211.799
Cell 6	82.4621	1.69494	44.7214	0.99573	82.4621	0.641915	44.7214	1.22463		117.203	198.652	193.707	192.88	120.131	77.1137	211.904	259.505
Cell 6	80	0.869511	40	0.742068	63.2456	0.850784	63.2456	1.16472		147.782	128.498	258.308	191.682	167.145	142.204	179.451	209.01
Cell 6	82.4621	1.17799	44.7214	1.03672	44.7214	1.2854	82.4621	1.30194		179.038	210.905	232.613	241.155	133.842	172.04	228.257	297.177
Cell 6	89.4427	1.38068	56.5685	1.30705	28.2843	1.0446	101.98	1.53056		200.826	277.277	234.318	306.265	189.937	198.408	248.635	380.552
Cell 6	107.703	2.26075	44.7214	0.609852	107.703	2.02211	44.7214	0.717574		80.5388	182.079	205.721	125.459	29.2256	59.0974	211.377	151.678
Cell 6	101.98	1.36401	28.2843	0.895692	89.4427	1.16993	56.5685	0.898858		143.635	195.92	220.949	197.902	97.4474	114.006	186.654	167.776
Cell 6	100	1.27182	20	0.98482	72.111	1.17292	72.111	0.907924		172.128	218.915	261.872	257.897	157.681	184.947	217.091	197.102
Cell 6	101.98	1.13283	28.2843	0.893973	56.5685	1.0734	89.4427	1.03481		205.581	232.889	265.727	237.553	154.32	165.648	213.829	221.271
Cell 6	107.703	1.4091	44.7214	1.09969	44.7214	1.42523	107.703	1.62762		200.333	282.29	213.147	234.395	141.422	201.559	219.561	357.362
Cell 7	101.98	0.950671	101.98	1.81077	141.421	Inf	28.2843	0.685006		155.356	147.693	11.0478	20.0051	0	18.2265	100.118	68.5815
Cell 7	82.4621	0.820364	107.703	2.18098	128.062	2.89774	44.7214	0.566428		224.395	184.086	7.70764	16.8102	6.93649	20.1001	93.6959	53.072
Cell 7	63.2456	1.04656	116.619	4.50428	116.619	1.10271	63.2456	0.550355		274.053	286.814	3.61719	16.2929	14.1316	15.5831	66.2298	36.4499
Cell 7	44.7214	0.597079	128.062	Inf	107.703	Inf	82.4621	0.854456		235.521	140.625	0	17.5625	0	17.3223	22.7312	19.4228
Cell 7	28.2843	0.47644	141.421	Inf	101.98	3.9336	101.98	Inf		204.005	97.196	0	19.7157	4.61509	18.1539	0	16.8577
Cell 7	107.703	0.639557	82.4621	0.421291	128.062	Inf	44.7214	1.93742		203.738	130.302	52.3703	22.0631	0	20.1805	56.8659	110.173
Cell 7	89.4427	1.25174	89.4427	0.382599	113.137	0.664262	56.5685	3.11609		224.216	280.659	51.4039	19.6671	28.1968	18.7301	36.4747	113.659
Cell 7	72.111	0.707244	100	0.426527	100	0.451821	72.111	2.7197		260.195	184.021	38.7882	16.5442	36.4441	16.4662	23.6039	64.1955
Cell 7	56.5685	0.416659	113.137	2.06767	89.4427	0.24205	89.4427	2.32736		267.768	111.568	8.18903	16.9322	72.7285	17.6039	15.6894	36.5149
Cell 7	44.7214	0.571314	128.062	Inf	82.4621	0.313976	107.703	Inf		166.166	94.9332	0	14.9875	61.9272	19.4437	0	21.8251
Cell 7	116.619	2.06142	63.2456	0.195022	116.619	0.794335	63.2456	5.99538		95.3464	196.549	141.514	27.5984	26.2636	20.8621	27.7124	166.146
Cell 7	100	1.08181	72.111	0.380547	100	0.3006	72.111	Inf		202.771	219.36	126.185	48.0192	86.1952	25.9103	0	128.13
Cell 7	84.8528	0.893075	84.8528	0.347146	84.8528	0.22391	84.8528	Inf		237.815	212.387	67.1254	23.3024	113.985	25.5223	0	96.2012
Cell 7	72.111	0.772927	100	0.435619	72.111	0.148374	100	Inf		224.635	173.626	42.358	18.452	183.035	27.1576	0	34.6594
Cell 7	63.2456	0.681242	116.619	Inf	63.2456	0.255753	116.619	Inf		187.255	127.566	0	18.1718	179.186	45.8273	0	22.3991
Cell 7	128.062	1.52437	44.7214	0.465493	107.703	0.44497	82.4621	11.3661		75.7873	115.528	176.76	82.2805	60.405	26.8784	10.3557	117.704
Cell 7	113.137	2.12131	56.5685	0.459237	89.4427	0.263524	89.4427	Inf		110.897	235.247	117.809	54.1022	138.811	36.58	0	81.1299
Cell 7	100	1.72557	72.111	0.538861	72.111	0.229779	100	Inf		150.971	260.51	63.0698	33.9858	202.744	46.5863	0	31.1651
Cell 7	89.4427	0.914386	89.4427	0.853236	56.5685	0.190344	113.137	Inf		178.21	162.953	23.1953	19.791	240.701	45.816	0	25.2999
Cell 7	82.4621	0.885518	107.703	Inf	44.7214	0.292184	128.062	Inf		135.265	119.78	0	15.9457	273.925	80.0364	0	16.5994
Cell 7	141.421	10.9615	28.2843	0.955104	101.98	0.623218	101.98	Inf		22.2519	243.914	124.211	118.635	80.4871	50.161	0	89.8598
Cell 7	128.062	4.94515	44.7214	1.20785	82.4621	0.419232	107.703	Inf		57.8619	286.136	78.8465	95.2347	188.79	79.1469	0	53.4766
Cell 7	116.619	3.15327	63.2456	3.91304	63.2456	0.504593	116.619	Inf		82.9797	261.658	10.7434	42.0396	243.474	122.855	0	28.6615
Cell 7	107.703	3.57204	82.4621	Inf	44.7214	0.431511	128.062	Inf		52.8543	188.798	0	19.2177	265.131	114.407	0	19.1129
Cell 7	101.98	3.10857	101.98	Inf	28.2843	0.293086	141.421	Inf		53.8168	167.294	0	16.6329	233.408	68.4088	0	16.0015
Cell 8	101.98	1.05515	101.98	0.321696	141.421	5.8322	28.2843	0.374981		112.914	119.142	256.479	82.5084	10.0004	58.3245	359.522	134.814
Cell 8	82.4621	0.741382	107.703	0.253433	128.062	1.21992	44.7214	0.382095		223.439	165.654	204.681	51.8728	57.0326	69.5751	266.098	101.675
Cell 8	63.2456	0.492431	116.619	0.227362	116.619	0.535353	63.2456	0.466804		285.389	140.534	105.341	23.9505	128.016	68.5337	154.772	72.2483
Cell 8	44.7214	0.50158	128.062	0.763017	107.703	0.424606	82.4621	0.614167		312.518	156.753	32.8862	25.0927	213.263	90.5529	83.5973	51.3427
Cell 8	28.2843	0.461093	141.421	Inf	101.98	0.562571	101.98	0.641233		308.509	142.251	0	19.3004	229.98	129.38	51.9716	33.3259
Cell 8	107.703	0.794551	82.4621	0.428752	128.062	Inf	44.7214	0.361813		126.117	100.206	303.253	130.02	0	50.8709	289.046	104.581
Cell 8	89.4427	0.615759	89.4427	0.288867	113.137	2.26897	56.5685	0.548682		237.111	146.003	251.263	72.5815	46.7579	106.092	158.609	87.0262
Cell 8	72.111	0.4452	100	0.276868	100	0.459992	72.111	0.809865		293.199	130.532	112.973	31.2786	174.296	80.1746	58.92	47.7173
Cell 8	56.5685	0.630654	113.137	1.22836	89.4427	0.370194	89.4427	2.37347		239.702	151.169	32.7609	40.2421	257.436	95.3011	14.9503	35.4841
Cell 8	44.7214	0.472353	128.062	Inf	82.4621	0.239818	107.703	Inf		301.11	142.23	0	22.361	304.037	72.9138	0	26.8246
Cell 8	116.619	1.10541	63.2456	0.338007	116.619	86.5602	63.2456	0.492052		98.9356	109.365	315.996	106.809	0.660892	57.2069	212.895	104.755
Cell 8	100	0.666699	72.111	0.327383	100	1.2441	72.111	0.545304		198.251	132.174	222.609	72.8783	55.4675	69.0071	133.484	72.7896
Cell 8	84.8528	0.472161	84.8528	0.374259	84.8528	0.424941	84.8528	1.58174		304.36	143.707	120.365	45.0479	211.538	89.8911	32.6041	51.5714
Cell 8	72.111	0.426072	100	1.01031	72.111	0.261049	100	Inf		278.959	118.857	37.911	38.3018	338.151	88.274	0	33.2365
Cell 8	63.2456	0.574979	116.619	5.1893	63.2456	0.259496	116.619	Inf		230.54	132.555	5.39434	27.9929	359.876	93.3864	0	33.4014
Cell 8	128.062	0.907365	44.7214	0.339221	107.703	6.52714	82.4621	0.707093		68.5719	62.2197	363.967	123.465	9.56234	62.4148	122.731	86.7822
Cell 8	113.137	0.85624	56.5685	0.389614	89.4427	0.857026	89.4427	1.22147		171.822	147.121	293.364	114.299	101.99	87.4083	54.6938	66.8066
Cell 8	100	0.6522	72.111	0.415781	72.111	0.523868	100	Inf		226.156	147.499	210.039	87.3304	229.114	120.025	0	42.1426
Cell 8	89.4427	1.21252	89.4427	0.333847	56.5685	0.377204	113.137	Inf		177.987	215.814	154.049	51.4289	337.845	127.437	0	28.7714
Cell 8	82.4621	0.791144	107.703	0.435562	44.7214	0.439124	128.062	Inf		189.116	149.618	113.048	49.2395	358.884	157.595	0	24.6519
Cell 8	141.421	0.841055	28.2843	0.32486	101.98	1.63224	101.98	2.78984		50.735	42.6709	430.509	139.855	42.278	69.0078	21.9646	61.2778
Cell 8	128.062	2.01639	44.7214	0.351057	82.4621	0.897125	107.703	57.7341		78.5978	158.484	368.813	129.474	129.325	116.021	0.691182	39.9048
Cell 8	116.619	1.78608	63.2456	0.410443	63.2456	0.723016	116.619	Inf		122.327	218.487	298.03	122.324	261.86	189.329	0	25.5262
Cell 8	107.703	1.25511	82.4621	0.344	44.7214	0.5858	128.062	Inf		136.417	171.219	243.772	83.8575	301.309	176.507	0	26.5609
Cell 8	101.98	0.766319	101.98	0.401603	28.2843	0.516172	141.421	Inf		117.507	90.0482	184.046	73.9134	347.961	179.608	0	26.8462
Cell 9	44.7214	1.25786	107.703	Inf	107.703	4.56489	44.7214	1.26055		356.396	448.296	0	98.5632	20.0984	91.7471	297.514	375.031
Cell 9	28.2843	0.8879	101.98	1.25697	89.4427	2.37407	56.5685	0.415751		387.175	343.772	33.0606	41.5561	113.738	270.022	246.024	102.284
Cell 9	20	1.3234	100	0.516702	72.111	1.8437	72.111	0.650142		420.842	556.943	56.8308	29.3646	154.05	284.02	205.55	133.636
Cell 9	28.2843	0.765345	101.98	0.806553	56.5685	1.22717	89.4427	0.555891		372.862	285.368	38.5649	31.1047	278.694	342.006	169.452	94.1969
Cell 9	44.7214	1.55422	107.703	1.3989	44.7214	1.39121	107.703	0.317813		358.579	557.31	16.4962	23.0764	272.226	378.722	118.626	37.7008
Cell 9	56.5685	0.592155	89.4427	2.92268	101.98	2.89656	28.2843	0.707576		431.64	255.598	66.3672	193.97	77.2801	223.847	366.902	259.611
Cell 9	44.7214	0.978993	82.4621	1.68831	82.4621	1.56387	44.7214	0.497291		460.284	450.615	105.174	177.566	167.902	262.577	384.263	191.09
Cell 9	40	0.773704	80	0.436592	63.2456	1.82513	63.2456	0.731432		431.465	333.826	157.801	68.8949	242.12	441.901	318.86	233.224
Cell 9	44.7214	0.531619	82.4621	0.256625	44.7214	1.74342	82.4621	0.545342		432.907	230.141	152.736	39.1957	290.954	507.255	200.646	109.421
Cell 9	56.5685	0.757631	89.4427	0.447332	28.2843	1.37674	101.98	1.15505		309.065	234.157	81.1691	36.3096	316.045	435.111	105.969	122.4
Cell 9	72.111	0.760917	72.111	1.86763	100	1.56114	20	0.806137		437.131	332.62	146.656	273.899	152.8	238.541	443.813	357.774
Cell 9	63.2456	0.915117	63.2456	1.22593	80	1.21953	40	0.576714		456.155	417.436	248.857	305.082	223.99	273.163	428.731	247.255
Cell 9	60	0.885874	60	0.68516	60	1.97481	60	0.829993		453.61	401.841	300.126	205.634	258.752	510.987	337.709	280.296
Cell 9	63.2456	0.517365	63.2456	0.592705	40	1.57698	80	0.42599		414.019	214.199	202.478	120.01	270.278	426.222	288.181	122.762
Cell 9	72.111	0.59826	72.111	0.601965	20	1.75783	100	0.5315		325.985	195.024	160.479	96.6027	311.01	546.703	170.377	90.5551
Cell 9	89.4427	0.884911	56.5685	1.22717	101.98	1.18597	28.2843	0.765345		353.061	312.428	278.694	342.006	232.327	275.533	372.862	285.368
Cell 9	82.4621	1.22915	44.7214	1.39121	82.4621	1.30633	44.7214	1.55422		289.05	355.287	272.226	378.722	295.945	386.601	358.579	557.31
Cell 9	80	0.653049	40	0.858127	63.2456	1.2636	63.2456	0.916853		373.569	243.959	291.303	249.975	321.94	406.805	304.096	278.811
Cell 9	82.4621	0.847769	44.7214	1.26055	44.7214	1.25786	82.4621	0.824677		328.595	278.573	297.514	375.031	356.396	448.296	255.549	210.746
Cell 9	89.4427	0.606596	56.5685	0.415751	28.2843	0.8879	101.98	0.77242		249.065	151.082	246.024	102.284	387.175	343.772	171.733	132.65
Cell 9	107.703	1.43003	44.7214	1.74342	107.703	1.00301	44.7214	0.531619		177.862	254.347	290.954	507.255	251.978	252.737	432.907	230.141
Cell 9	101.98	1.96715	28.2843	1.37674	89.4427	1.10728	56.5685	0.757631		148.262	291.653	316.045	435.111	326.91	361.98	309.065	234.157
Cell 9	100	1.66	20	1.97547	72.111	0.641081	72.111	0.808555		184.629	306.483	349.407	690.241	417.691	267.773	268.766	217.312
Cell 9	101.98	1.83983	28.2843	0.707576	56.5685	0.592155	89.4427	0.894825		193.682	356.34	366.902	259.611	431.64	255.598	180.116	161.172
Cell 9	107.703	0.948612	44.7214	0.497291	44.7214	0.978993	107.703	0.569128		153.321	145.442	384.263	191.09	460.284	450.615	122.489	69.7122
Cell 10	101.98	Inf	101.98	Inf	141.421	Inf	28.2843	1.67719		0	74.8252	0	41.6565	0	44.1637	372.239	624.317
Cell 10	82.4621	4.48448	107.703	Inf	128.062	Inf	44.7214	1.29		28.7181	128.786	0	30.8443	0	36.9638	360.032	464.442
Cell 10	63.2456	2.61292	116.619	Inf	116.619	Inf	63.2456	1.73571		113.08	295.469	0	109.301	0	39.4797	294.403	510.999
Cell 10	44.7214	0.817738	128.062	Inf	107.703	Inf	82.4621	0.851978		226.765	185.434	0	36.803	0	43.7627	301.756	257.089
Cell 10	28.2843	1.49974	141.421	Inf	101.98	Inf	101.98	0.972213		293.6	440.324	0	32.7482	0	33.0619	210.949	205.087
Cell 10	107.703	4.82347	82.4621	0.981403	128.062	Inf	44.7214	1.35104		13.4191	64.7265	50.5314	49.5916	0	31.4698	434.119	586.512
Cell 10	89.4427	2.03257	89.4427	1.12732	113.137	Inf	56.5685	1.21562		73.5577	149.511	35.2127	39.6959	0	45.1187	403.833	490.906
Cell 10	72.111	1.19367	100	28.6549	100	Inf	72.111	1.22937		189.706	226.447	2.00159	57.3554	0	56.1423	358.377	440.576
Cell 10	56.5685	1.13931	113.137	4.14522	89.4427	Inf	89.4427	1.12617		248.006	282.556	13.1394	54.4657	0	47.4603	330.139	371.792
Cell 10	44.7214	1.938	128.062	8.24753	82.4621	Inf	107.703	1.22268		307.881	596.674	5.88593	48.5444	0	50.7736	242.769	296.828
Cell 10	116.619	4.18142	63.2456	0.762446	116.619	Inf	63.2456	1.07056		20.5075	85.7506	150.931	115.076	0	40.1193	442.782	474.024
Cell 10	100	3.64623	72.111	1.61574	100	Inf	72.111	1.16019		67.7685	247.099	124.068	200.461	0	57.3547	407.144	472.365
Cell 10	84.8528	0.907938	84.8528	0.691174	84.8528	Inf	84.8528	0.945955		186.35	169.194	89.3676	61.7685	0	85.5881	341.465	323.01
Cell 10	72.111	1.4829	100	1.1674	72.111	Inf	100	1.35158		256.471	380.322	53.7354	62.7306	0	113.453	252.702	341.547
Cell 10	63.2456	1.45243	116.619	1.30345	63.2456	7.85795	116.619	1.92127		285.071	414.046	50.1343	65.3477	18.0531	141.86	124.424	239.052
Cell 10	128.062	1.27275	44.7214	0.577484	107.703	Inf	82.4621	1.30876		37.8715	48.2008	263.918	152.408	0	41.5834	364.7	477.304
Cell 10	113.137	0.696818	56.5685	0.64319	89.4427	Inf	89.4427	0.972963		144.223	100.497	249.533	160.497	0	42.9537	317.222	308.646
Cell 10	100	0.794751	72.111	0.807689	72.111	Inf	100	1.4268		224.943	178.774	207.792	167.831	0	63.5052	266.73	380.57
Cell 10	89.4427	0.923798	89.4427	1.23604	56.5685	Inf	113.137	0.820314		256.577	237.025	129.785	160.421	0	179.998	193.551	158.772
Cell 10	82.4621	1.66792	107.703	1.68528	44.7214	3.71023	128.062	1.72411		252.275	420.774	87.4864	147.439	55.9048	207.42	99.8627	172.175
Cell 10	141.421	2.05481	28.2843	0.648013	101.98	Inf	101.98	1.25581		33.1955	68.2105	339.728	220.148	0	39.2096	284.498	357.276
Cell 10	128.062	0.80412	44.7214	0.814126	82.4621	Inf	107.703	1.96443		152.669	122.764	318.677	259.443	0	65.0606	178.737	351.117
Cell 10	116.619	0.583241	63.2456	0.841542	63.2456	18.8464	116.619	2.01274		262.62	153.171	294.379	247.732	14.9465	281.688	119.106	239.729
Cell 10	107.703	1.3654	82.4621	1.2566	44.7214	4.63142	128.062	1.57068		256.201	349.816	214.505	269.548	45.281	209.716	99.9128	156.931
Cell 10	101.98	1.65626	101.98	0.928466	28.2843	2.34276	141.421	2.52166		212.929	352.664	154.169	143.14	149.891	351.158	56.8721	143.412
Cell 11	44.7214	1.07425	107.703	0.946059	107.703	Inf	44.7214	0.991591		252.808	271.578	113.12	107.018	0	46.1335	302.131	299.591
Cell 11	28.2843	1.62366	101.98	0.684453	89.4427	1.29922	56.5685	1.38633		303.126	492.173	198.71	136.008	50.5552	65.6825	242.906	336.748
Cell 11	20	1.73957	100	0.42222	72.111	0.847098	72.111	1.187		334.907	582.594	246.169	103.938	125.859	106.615	145.445	172.642
Cell 11	28.2843	1.15261	101.98	0.232908	56.5685	0.851944	89.4427	2.52463		340.967	393.003	156.672	36.4903	234.983	200.192	53.1843	134.271
Cell 11	44.7214	0.604727	107.703	0.635687	44.7214	0.970653	107.703	Inf		290.481	175.661	45.9726	29.2242	354.065	343.674	0	81.4877
Cell 11	56.5685	1.08018	89.4427	0.605594	101.98	1.35786	28.2843	1.23084		221.879	239.668	192.288	116.448	27.3458	37.1318	272.28	335.132
Cell 11	44.7214	1.48772	82.4621	0.634756	82.4621	0.538149	44.7214	1.33694		278.664	414.575	279.133	177.182	110.094	59.247	245.934	328.8
Cell 11	40	1.74448	80	0.342632	63.2456	0.477104	63.2456	1.26142		287.881	502.201	310.013	106.22	150.929	72.009	174.027	219.521
Cell 11	44.7214	1.16628	82.4621	0.292994	44.7214	0.964488	82.4621	3.30438		285.51	332.984	281.861	82.5836	259.186	249.982	66.7927	220.709
Cell 11	56.5685	1.45448	89.4427	0.232077	28.2843	1.21058	101.98	5.07739		243.638	354.365	157.039	36.4453	339.785	411.337	12.8973	65.4845
Cell 11	72.111	0.814208	72.111	0.713256	100	0.925264	20	1.3821		215.217	175.231	240.487	171.529	45.9617	42.5267	320.14	442.465
Cell 11	63.2456	0.983332	63.2456	0.767753	80	0.371391	40	1.11882		305.298	300.21	320.972	246.427	137.38	51.0218	283.338	317.003
Cell 11	60	0.857857	60	0.560613	60	0.59697	60	0.868739		322.879	276.984	385.956	216.372	259.944	155.179	238.853	207.501
Cell 11	63.2456	0.953945	63.2456	0.615934	40	1.1431	80	2.76361		288.978	275.669	344.996	212.494	293.018	334.947	75.5281	208.73
Cell 11	72.111	2.46275	72.111	0.620608	20	1.01661	100	2.99437		187.015	460.571	260.496	161.666	344.774	350.5	32.4143	97.0605
Cell 11	89.4427	0.558133	56.5685	0.851944	101.98	1.87714	28.2843	1.15261		205.534	114.715	234.983	200.192	30.2988	56.8749	340.967	393.003
Cell 11	82.4621	0.568628	44.7214	0.970653	82.4621	0.798541	44.7214	0.604727		262.418	149.218	354.065	343.674	129.419	103.347	290.481	175.661
Cell 11	80	0.767928	40	1.09269	63.2456	0.95845	63.2456	1.16203		262.252	201.39	368.783	402.967	191.98	184.003	237.141	275.566
Cell 11	82.4621	1.9409	44.7214	0.991591	44.7214	1.07425	82.4621	4.04517		185.452	359.942	302.131	299.591	252.808	271.578	66.8911	270.586
Cell 11	89.4427	3.04045	56.5685	1.38633	28.2843	1.62366	101.98	6.73608		104.325	317.195	242.906	336.748	303.126	492.173	31.0077	208.87
Cell 11	107.703	1.35704	44.7214	0.964488	107.703	33.5893	44.7214	1.16628		63.2779	85.8709	259.186	249.982	1.10666	37.172	285.51	332.984
Cell 11	101.98	0.853314	28.2843	1.21058	89.4427	1.81593	56.5685	1.45448		149.013	127.155	339.785	411.337	55.8973	101.505	243.638	354.365
Cell 11	100	1.41098	20	1.39385	72.111	0.914454	72.111	1.61001		148.887	210.076	346.802	483.388	159.372	145.739	185.001	297.854
Cell 11	101.98	1.86583	28.2843	1.23084	56.5685	1.08018	89.4427	3.26767		150.354	280.535	272.28	335.132	221.879	239.668	77.0253	251.693
Cell 11	107.703	3.70662	44.7214	1.33694	44.7214	1.48772	107.703	Inf		70.3589	260.794	245.934	328.8	278.664	414.575	0	242.154
Cell 12	44.7214	1.96017	107.703	Inf	107.703	2.50861	44.7214	1.29754		244.293	478.855	0	29.9462	26.2651	65.8891	260.99	338.645
Cell 12	28.2843	1.43703	101.98	Inf	89.4427	0.606838	56.5685	1.0404		393.771	565.861	0	29.4154	105.488	64.0142	229.43	238.699
Cell 12	20	1.66267	100	Inf	72.111	1.41969	72.111	1.1009		405.37	673.998	0	26.3628	152.626	216.682	172.047	189.406
Cell 12	28.2843	1.41925	101.98	Inf	56.5685	1.65224	89.4427	1.00733		375.548	532.997	0	27.0437	146.44	241.954	53.5382	53.9306
Cell 12	44.7214	1.37672	107.703	3.70729	44.7214	2.24554	107.703	Inf		401.502	552.754	6.85512	25.4139	146.982	330.055	0	30.5512
Cell 12	56.5685	2.33533	89.4427	Inf	101.98	3.57509	28.2843	1.01938		173.04	404.106	0	94.1824	29.3415	104.899	402.151	409.946
Cell 12	44.7214	2.37891	82.4621	4.96613	82.4621	1.53696	44.7214	0.655995		297.488	707.697	7.1779	35.6464	119.668	183.924	402.628	264.122
Cell 12	40	2.50858	80	2.62763	63.2456	1.27585	63.2456	0.615128		341.27	856.104	29.2161	76.7692	222.377	283.72	312.001	191.921
Cell 12	44.7214	2.23878	82.4621	3.19185	44.7214	1.62372	82.4621	0.648262		317.007	709.71	24.8741	79.3945	227.749	369.8	175.721	113.914
Cell 12	56.5685	1.66988	89.4427	1.69879	28.2843	1.60073	101.98	0.5803		270.263	451.306	48.8767	83.0314	304.636	487.64	83.1337	48.2425
Cell 12	72.111	5.93604	72.111	21.2646	100	7.86244	20	1.05738		68.7666	408.201	9.04879	192.419	17.3311	136.265	451.706	477.627
Cell 12	63.2456	2.96562	63.2456	4.14447	80	3.07035	40	0.986205		157.956	468.439	43.4746	180.179	69.7431	214.136	439.16	433.102
Cell 12	60	2.7485	60	1.82946	60	1.64582	60	0.709656		205.203	564	84.0826	153.826	183.326	301.722	390.727	277.282
Cell 12	63.2456	1.3136	63.2456	1.20146	40	1.5793	80	0.884762		290.195	381.2	106.013	127.37	272.039	429.632	251.705	222.699
Cell 12	72.111	1.51085	72.111	1.57669	20	1.41725	100	0.843792		290.51	438.917	96.5851	152.285	352.207	499.164	122.298	103.194
Cell 12	89.4427	Inf	56.5685	1.65224	101.98	Inf	28.2843	1.41925		0	266.329	146.44	241.954	0	151.809	375.548	532.997
Cell 12	82.4621	29.0928	44.7214	2.24554	82.4621	19.714	44.7214	1.37672		14.3711	418.096	146.982	330.055	11.9884	236.34	401.502	552.754
Cell 12	80	4.71192	40	1.72244	63.2456	3.72699	63.2456	1.1289		98.3378	463.36	203.418	350.376	108.28	403.558	315.736	356.434
Cell 12	82.4621	2.7007	44.7214	1.29754	44.7214	1.96017	82.4621	1.1113		159.08	429.628	260.99	338.645	244.293	478.855	236.419	262.733
Cell 12	89.4427	2.30211	56.5685	1.0404	28.2843	1.43703	101.98	1.78263		208.13	479.138	229.43	238.699	393.771	565.861	122.243	217.914
Cell 12	107.703	Inf	44.7214	1.62372	107.703	Inf	44.7214	2.23878		0	232.737	227.749	369.8	0	113.3	317.007	709.71
Cell 12	101.98	Inf	28.2843	1.60073	89.4427	28.4894	56.5685	1.66988		0	217.971	304.636	487.64	6.84601	195.038	270.263	451.306
Cell 12	100	29.4673	20	1.41307	72.111	3.40006	72.111	1.99886		11.5636	340.747	344.001	486.099	77.8488	264.691	207.671	415.105
Cell 12	101.98	6.50658	28.2843	1.01938	56.5685	2.33533	89.4427	2.65389		49.8191	324.152	402.151	409.946	173.04	404.106	133.559	354.451
Cell 12	107.703	2.60652	44.7214	0.655995	44.7214	2.37891	107.703	8.07952		105.397	274.72	402.628	264.122	297.488	707.697	24.4337	197.412
Cell 13	44.7214	0.500197	107.703	0.447651	107.703	0.55507	44.7214	0.618402		384.391	192.271	105.476	47.2165	252.491	140.15	288.238	178.247
Cell 13	28.2843	0.657739	101.98	0.398923	89.4427	0.451784	56.5685	0.39353		346.101	227.644	116.444	46.4523	277.36	125.307	288.609	113.577
Cell 13	20	0.601067	100	0.331894	72.111	0.447867	72.111	0.414096		276.493	166.191	133.354	44.2594	319.105	142.916	229.335	94.9668
Cell 13	28.2843	0.866613	101.98	0.379977	56.5685	0.447226	89.4427	0.552589		207.447	179.776	104.199	39.5933	288.378	128.97	66.2163	36.5904
Cell 13	44.7214	1.57799	107.703	0.39624	44.7214	0.489783	107.703	11.4218		117.256	185.029	82.5048	32.6917	283.438	138.823	2.40911	27.5164
Cell 13	56.5685	0.394195	89.4427	0.464362	101.98	0.783867	28.2843	0.738418		332.446	131.049	219.664	102.003	271.808	213.061	222.789	164.512
Cell 13	44.7214	0.50029	82.4621	0.391774	82.4621	0.72557	44.7214	0.752992		259.838	129.994	226.389	88.693	341.524	247.8	225.082	169.485
Cell 13	40	1.02822	80	0.475774	63.2456	0.773737	63.2456	0.90005		202.776	208.499	249.547	118.728	328.868	254.457	149.343	134.416
Cell 13	44.7214	1.26865	82.4621	0.340395	44.7214	0.678839	82.4621	1.39889		138.789	176.075	223.882	76.2083	338.222	229.598	71.3659	99.833
Cell 13	56.5685	2.99316	89.4427	0.32672	28.2843	0.489191	101.98	5.11338		47.0728	140.896	175.967	57.4919	344.188	168.374	6.66307	34.0708
Cell 13	72.111	0.744339	72.111	0.54243	100	0.870603	20	0.810315		288.495	214.738	298.92	162.143	276.563	240.776	225.533	182.753
Cell 13	63.2456	0.883523	63.2456	0.313429	80	0.691304	40	0.932792		223.909	197.829	315.254	98.8098	347.354	240.127	164.535	153.477
Cell 13	60	1.65285	60	0.461963	60	0.420735	60	1.08588		131.522	217.386	269.162	124.343	397.397	167.199	115.777	125.719
Cell 13	63.2456	3.9401	63.2456	0.461237	40	0.673907	80	1.33308		41.6197	163.986	273.994	126.376	382.891	258.033	46.8768	62.4905
Cell 13	72.111	Inf	72.111	0.326332	20	0.805847	100	Inf		0	133.931	262.206	85.5661	322.378	259.788	0	39.4195
Cell 13	89.4427	1.4082	56.5685	0.447226	101.98	0.927353	28.2843	0.866613		215.058	302.846	288.378	128.97	271.777	252.033	207.447	179.776
Cell 13	82.4621	1.1502	44.7214	0.489783	82.4621	0.681443	44.7214	1.57799		166.907	191.976	283.438	138.823	384.304	261.881	117.256	185.029
Cell 13	80	2.2904	40	0.604643	63.2456	0.813995	63.2456	3.02684		77.0947	176.578	254.919	154.135	406.253	330.688	49.9709	151.254
Cell 13	82.4621	26.1691	44.7214	0.618402	44.7214	0.500197	82.4621	31.1522		6.7255	176	288.238	178.247	384.391	192.271	2.20047	68.5494
Cell 13	89.4427	Inf	56.5685	0.39353	28.2843	0.657739	101.98	Inf		0	163.761	288.609	113.577	346.101	227.644	0	31.0404
Cell 13	107.703	2.23228	44.7214	0.678839	107.703	0.883649	44.7214	1.26865		122.567	273.605	338.222	229.598	263.858	233.158	138.789	176.075
Cell 13	101.98	3.02918	28.2843	0.489191	89.4427	0.743375	56.5685	2.99316		69.514	210.57	344.188	168.374	360.196	267.761	47.0728	140.896
Cell 13	100	3.31841	20	0.754492	72.111	0.617366	72.111	16.237		41.986	139.327	258.518	195.05	409.404	252.752	6.09268	98.9269
Cell 13	101.98	Inf	28.2843	0.738418	56.5685	0.394195	89.4427	Inf		0	116.706	222.789	164.512	332.446	131.049	0	78.7023
Cell 13	107.703	Inf	44.7214	0.752992	44.7214	0.50029	107.703	Inf		0	109.322	225.082	169.485	259.838	129.994	0	46.4749
Cell 14	101.98	0.394361	101.98	3.38942	141.421	Inf	28.2843	0.273976		141.255	55.7053	6.99279	23.7015	0	24.7838	267.965	73.4159
Cell 14	82.4621	0.479283	107.703	Inf	128.062	Inf	44.7214	0.15579		243.079	116.504	0	19.6442	0	8.87629	205.096	31.9519
Cell 14	63.2456	1.16821	116.619	Inf	116.619	Inf	63.2456	0.192451		275.89	322.296	0	24.7439	0	27.298	131.259	25.2609
Cell 14	44.7214	1.40103	128.062	Inf	107.703	Inf	82.4621	0.39474		298.019	417.533	0	24.3652	0	19.9829	58.6052	23.1339
Cell 14	28.2843	1.13063	141.421	0.630041	101.98	1.21365	101.98	8.61989		333.527	377.097	6.18103	3.8943	20.7258	25.1539	2.76267	23.8139
Cell 14	107.703	0.391996	82.4621	0.350238	128.062	Inf	44.7214	1.03136		192.215	75.3476	74.9829	26.2619	0	38.1335	176.244	181.772
Cell 14	89.4427	0.809391	89.4427	0.234627	113.137	Inf	56.5685	0.457804		271.408	219.675	65.006	15.2522	0	20.846	122.925	56.2757
Cell 14	72.111	1.15191	100	0.239998	100	Inf	72.111	0.371888		330.94	381.214	79.0771	18.9784	0	22.4751	60.1939	22.3854
Cell 14	56.5685	1.45058	113.137	0.251007	89.4427	0.654019	89.4427	1.09917		329.924	478.58	62.5532	15.7013	36.7429	24.0306	32.5192	35.7442
Cell 14	44.7214	1.50196	128.062	1.11851	82.4621	0.279804	107.703	10.8578		322.917	485.008	29.5612	33.0645	76.8673	21.5078	1.91523	20.7952
Cell 14	116.619	0.421989	63.2456	0.113593	116.619	Inf	63.2456	1.75973		155.405	65.5792	202.637	23.0181	0	24.1402	152.94	269.132
Cell 14	100	0.628331	72.111	0.0948868	100	Inf	72.111	3.16789		287.74	180.796	239.227	22.6995	0	17.8902	48.9765	155.152
Cell 14	84.8528	1.2165	84.8528	0.128883	84.8528	8.29124	84.8528	Inf		352.793	429.174	207.501	26.7433	6.28232	52.0882	0	54.8307
Cell 14	72.111	1.06709	100	0.237969	72.111	0.284006	100	Inf		367.429	392.079	128.167	30.4998	84.8161	24.0883	0	24.6315
Cell 14	63.2456	1.32586	116.619	0.37104	63.2456	0.0379462	116.619	Inf		379.342	502.956	52.5056	19.4817	157.402	5.9728	0	16.4558
Cell 14	128.062	0.271661	44.7214	0.121122	107.703	Inf	82.4621	2.18871		165.519	44.9649	345.18	41.8088	0	62.1168	140.412	307.322
Cell 14	113.137	0.542507	56.5685	0.0792331	89.4427	1.75002	89.4427	5.65204		294.014	159.505	358.348	28.393	14.6565	25.6493	32.6877	184.752
Cell 14	100	0.840327	72.111	0.0699692	72.111	0.319964	100	Inf		372.04	312.635	283.571	19.8413	66.0199	21.124	0	65.9256
Cell 14	89.4427	0.936993	89.4427	0.0993994	56.5685	0.344984	113.137	Inf		420.318	393.835	165.143	16.4152	160.921	55.515	0	33.5808
Cell 14	82.4621	0.978401	107.703	0.266507	44.7214	0.158276	128.062	Inf		403.197	394.489	49.9367	13.3085	242.418	38.369	0	26.0801
Cell 14	141.421	0.209459	28.2843	0.0565386	101.98	Inf	101.98	3.80281		191.378	40.0859	338.384	19.1317	0	26.8631	74.2952	282.531
Cell 14	128.062	0.21825	44.7214	0.0624023	82.4621	0.941221	107.703	Inf		311.436	67.971	340.388	21.241	47.0347	44.2701	0	127.782
Cell 14	116.619	0.353257	63.2456	0.1075	63.2456	0.420461	116.619	Inf		353.668	124.936	214.116	23.0174	111.853	47.0296	0	60.2208
Cell 14	107.703	0.682459	82.4621	0.141147	44.7214	0.291523	128.062	Inf		356.448	243.261	91.7765	12.9539	196.099	57.1676	0	28.2789
Cell 14	101.98	0.695663	101.98	3.62132	28.2843	0.221909	141.421	Inf		328.929	228.824	27.0632	98.0044	325.919	72.3244	0	16.5265
Cell 15	101.98	Inf	101.98	0.544224	141.421	Inf	28.2843	0.540169		0	36.4726	78.0766	42.4912	0	37.1087	376.662	203.461
Cell 15	82.4621	4.10551	107.703	0.288333	128.062	Inf	44.7214	0.77667		24.2787	99.6767	129.52	37.345	0	18.9712	315.48	245.024
Cell 15	63.2456	1.05024	116.619	0.278406	116.619	Inf	63.2456	0.800637		123.724	129.939	122.154	34.0085	0	27.2214	302.301	242.034
Cell 15	44.7214	0.825903	128.062	0.767429	107.703	1.92406	82.4621	1.02511		240.318	198.479	48.1181	36.9272	16.1526	31.0785	209.787	215.055
Cell 15	28.2843	0.598153	141.421	Inf	101.98	0.671052	101.98	2.32449		318.737	190.654	0	32.8879	49.723	33.3667	102.397	238.021
Cell 15	107.703	Inf	82.4621	0.326292	128.062	Inf	44.7214	0.723534		0	35.3601	204.775	66.8165	0	37.5816	306.184	221.535
Cell 15	89.4427	1.97804	89.4427	0.259684	113.137	6.82911	56.5685	1.33552		50.4099	99.7129	283.503	73.621	4.46382	30.4839	220.176	294.049
Cell 15	72.111	0.903355	100	0.286049	100	1.2194	72.111	0.881655		161.85	146.208	209.166	59.8318	21.7923	26.5736	211.428	186.407
Cell 15	56.5685	0.938784	113.137	0.421691	89.4427	0.694019	89.4427	1.19219		217.658	204.334	104.012	43.8607	41.829	29.0301	171.716	204.719
Cell 15	44.7214	0.960037	128.062	28.3204	82.4621	0.387944	107.703	3.06928		217.502	208.81	0.884484	25.049	98.8218	38.3373	86.4195	265.246
Cell 15	116.619	Inf	63.2456	0.37649	116.619	Inf	63.2456	0.828823		0	39.5391	274.913	103.502	0	32.3983	247.097	204.8
Cell 15	100	0.984725	72.111	0.299305	100	0.960759	72.111	0.647954		59.5429	58.6334	326.593	97.7509	31.5433	30.3055	242.257	156.971
Cell 15	84.8528	1.09978	84.8528	0.342285	84.8528	0.490467	84.8528	1.59894		132.156	145.343	305.817	104.677	79.0245	38.7589	150.541	240.706
Cell 15	72.111	1.70806	100	0.556769	72.111	0.412408	100	1.40459		168.711	288.169	148.243	82.5368	128.439	52.9694	158.225	222.24
Cell 15	63.2456	2.71011	116.619	1.2182	63.2456	0.506083	116.619	5.22676		105.302	285.38	36.0027	43.8585	164.308	83.1535	40.9726	214.154
Cell 15	128.062	Inf	44.7214	0.380786	107.703	Inf	82.4621	0.997852		0	26.9826	283.742	108.045	0	28.9001	243.238	242.716
Cell 15	113.137	3.82054	56.5685	0.344674	89.4427	0.891243	89.4427	1.07854		21.2146	81.0512	333.538	114.962	48.6354	43.346	154.23	166.343
Cell 15	100	2.92839	72.111	0.447578	72.111	0.37017	100	1.79528		64.4667	188.784	320.168	143.3	129.646	47.9913	124.306	223.163
Cell 15	89.4427	6.3184	89.4427	0.808566	56.5685	0.452895	113.137	1.23207		47.1412	297.857	193.657	156.584	203.173	92.0158	128.578	158.417
Cell 15	82.4621	5.13535	107.703	1.09185	44.7214	0.511188	128.062	2.39988		54.0713	277.675	87.2238	95.2353	226.124	115.592	57.0066	136.809
Cell 15	141.421	Inf	28.2843	0.545183	101.98	Inf	101.98	0.822538		0	42.2634	331.302	180.62	0	30.662	211.847	174.253
Cell 15	128.062	Inf	44.7214	0.471154	82.4621	3.39623	107.703	1.87794		0	68.03	396.115	186.631	17.6316	59.8812	115.085	216.123
Cell 15	116.619	11.6187	63.2456	0.503915	63.2456	0.684175	116.619	1.69299		15.1481	176.001	409.034	206.118	115.542	79.0512	110.7	187.414
Cell 15	107.703	9.87941	82.4621	0.574863	44.7214	0.514985	128.062	1.5842		23.1471	228.68	277.89	159.749	267.267	137.639	93.8706	148.709
Cell 15	101.98	3.3693	101.98	1.06533	28.2843	0.624381	141.421	1.68939		78.9102	265.873	128.61	137.012	282.637	176.473	59.6891	100.838

## Sheet: E
Off	Distance Max	Max amp/dend len	Distance Opp	Opp amp/dend len	Distance Max + 90	Max + 90 amp/dend len	Distance Max -90	Max-90 amp/den len		Max den len	Max amp	Opp den len	Opp amp	Max + 90 len	Max + 90 amp	Max -90 len	Max-90 amp
Cell 1	44.7214	1.74565	107.703	NaN	107.703	NaN	44.7214	2.23819		276.429	482.55	0	0	0	0	116.546	260.851
Cell 1	28.2843	1.51747	101.98	NaN	89.4427	NaN	56.5685	1.6401		355.078	538.82	0	0	0	0	142.035	232.952
Cell 1	20	0.803416	100	NaN	72.111	3.31846	72.111	1.45202		346.98	278.769	0	0	25.3783	84.2169	140.347	203.787
Cell 1	28.2843	1.43999	101.98	NaN	56.5685	1.18789	89.4427	2.24804		350.816	505.172	0	0	104.246	123.833	61.254	137.702
Cell 1	44.7214	1.13685	107.703	NaN	44.7214	1.31413	107.703	Inf		329.907	375.053	0	0	133.591	175.555	0	95.5692
Cell 1	56.5685	1.84679	89.4427	NaN	101.98	NaN	28.2843	1.73915		332.986	614.956	0	0	0	0	181.093	314.948
Cell 1	44.7214	1.53947	82.4621	0	82.4621	13.1309	44.7214	1.15609		414.089	637.475	17.5973	0	5.78449	75.9557	266.353	307.928
Cell 1	40	0.988593	80	0	63.2456	2.17934	63.2456	1.12492		388.804	384.369	20.7307	0	75.9012	165.414	238.685	268.501
Cell 1	44.7214	1.06336	82.4621	0	44.7214	1.09387	82.4621	1.60377		358.939	381.681	18.7652	0	152.39	166.695	148.33	237.887
Cell 1	56.5685	1.19567	89.4427	0	28.2843	1.22221	101.98	7.42146		295.824	353.708	7.4899	0	210.665	257.479	18.5975	138.021
Cell 1	72.111	1.70342	72.111	2.35782	100	0	20	1.07572		312.681	532.628	35.2543	83.1235	14.4373	0	305.397	328.521
Cell 1	63.2456	1.84681	63.2456	1.4585	80	2.74976	40	1.05055		321.045	592.909	68.9124	100.509	46.8695	128.88	353.008	370.851
Cell 1	60	1.06923	60	1.57474	60	1.96409	60	1.01408		332.6	355.627	65.6315	103.352	102.65	201.613	319.58	324.079
Cell 1	63.2456	1.09765	63.2456	2.21283	40	1.56281	80	2.12675		285.344	313.21	54.8055	121.275	215.563	336.885	138.93	295.47
Cell 1	72.111	1.52259	72.111	3.14326	20	1.50478	100	4.02294		208.384	317.283	37.9041	119.142	289.412	435.502	33.2368	133.71
Cell 1	89.4427	2.59375	56.5685	1.18789	101.98	5.67122	28.2843	1.43999		155.261	402.707	104.246	123.833	19.5037	110.61	350.816	505.172
Cell 1	82.4621	1.8052	44.7214	1.31413	82.4621	5.17767	44.7214	1.13685		217.245	392.172	133.591	175.555	34.9315	180.864	329.907	375.053
Cell 1	80	1.59568	40	2.02182	63.2456	2.00803	63.2456	1.0268		222.43	354.927	117.074	236.702	178.365	358.162	308.567	316.836
Cell 1	82.4621	1.64622	44.7214	2.23819	44.7214	1.74565	82.4621	1.85515		170.891	281.323	116.546	260.851	276.429	482.55	142.456	264.276
Cell 1	89.4427	2.01747	56.5685	1.6401	28.2843	1.51747	101.98	4.47112		111.506	224.96	142.035	232.952	355.078	538.82	39.9573	178.654
Cell 1	107.703	4.55197	44.7214	1.09387	107.703	0	44.7214	1.06336		50.798	231.231	152.39	166.695	22.7668	0	358.939	381.681
Cell 1	101.98	5.16951	28.2843	1.22221	89.4427	1.50266	56.5685	1.19567		70.5472	364.694	210.665	257.479	106.768	160.436	295.824	353.708
Cell 1	100	3.47289	20	1.31695	72.111	1.7489	72.111	1.40771		93.3727	324.273	184.297	242.711	224.669	392.924	218.924	308.182
Cell 1	101.98	2.97463	28.2843	1.73915	56.5685	1.84679	89.4427	2.12882		81.3886	242.101	181.093	314.948	332.986	614.956	107.988	229.887
Cell 1	107.703	4.33884	44.7214	1.15609	44.7214	1.53947	107.703	1.96017		35.4446	153.789	266.353	307.928	414.089	637.475	35.6856	69.95
Cell 2	44.7214	1.56933	107.703	NaN	107.703	0	44.7214	0		261.252	409.992	0	0	25.9744	0	118.725	0
Cell 2	28.2843	1.35118	101.98	0	89.4427	0	56.5685	0		247.611	334.568	1.78227	0	32.3576	0	20.6501	0
Cell 2	20	1.33478	100	0	72.111	0	72.111	NaN		163.231	217.877	20.1653	0	19.0664	0	0	0
Cell 2	28.2843	0	101.98	0	56.5685	0	89.4427	NaN		73.064	0	20.1653	0	66.2496	0	0	0
Cell 2	44.7214	NaN	107.703	NaN	44.7214	0	107.703	NaN		0	0	0	0	150.826	0	0	0
Cell 2	56.5685	2.40977	89.4427	NaN	101.98	0	28.2843	0		153.898	370.86	0	0	60.143	0	82.5425	0
Cell 2	44.7214	2.4992	82.4621	0	82.4621	0	44.7214	0		135.242	337.998	13.7217	0	115.222	0	14.2083	0
Cell 2	40	3.45004	80	0	63.2456	0	63.2456	NaN		115.184	397.389	54.1658	0	166.666	0	0	0
Cell 2	44.7214	1.79595	82.4621	0	44.7214	0	82.4621	NaN		36.8104	66.1098	57.6864	0	209.526	0	0	0
Cell 2	56.5685	0	89.4427	0	28.2843	0	101.98	NaN		9.24011	0	16.6371	0	244.934	0	0	0
Cell 2	72.111	14.0065	72.111	NaN	100	0.420914	20	0		23.2453	325.585	0	0	60.143	25.3151	76.2755	0
Cell 2	63.2456	12.3516	63.2456	0	80	0	40	0		27.6842	341.945	44.65	0	165.025	0	4.73812	0
Cell 2	60	1.73595	60	0	60	0	60	NaN		55.3309	96.0519	110.653	0	241.278	0	0	0
Cell 2	63.2456	2.822	63.2456	0	40	0.991898	80	NaN		33.821	95.4426	80.0189	0	308.35	305.852	0	0
Cell 2	72.111	0	72.111	0	20	0.795336	100	NaN		9.34479	0	34.9421	0	302.469	240.564	0	0
Cell 2	89.4427	Inf	56.5685	0	101.98	1.90247	28.2843	0		0	135.077	66.2496	0	66.545	126.6	73.064	0
Cell 2	82.4621	9.88376	44.7214	0	82.4621	0.508474	44.7214	NaN		8.30643	82.0988	150.826	0	138.94	70.6475	0	0
Cell 2	80	2.53041	40	0	63.2456	0.913553	63.2456	NaN		22.0618	55.8254	170.495	0	250.06	228.443	0	0
Cell 2	82.4621	2.47735	44.7214	0	44.7214	1.56933	82.4621	NaN		22.0618	54.6548	118.725	0	261.252	409.992	0	0
Cell 2	89.4427	0	56.5685	0	28.2843	1.35118	101.98	NaN		13.7554	0	20.6501	0	247.611	334.568	0	0
Cell 2	107.703	NaN	44.7214	0	107.703	2.93782	44.7214	1.79595		0	0	209.526	0	41.9799	123.33	36.8104	66.1098
Cell 2	101.98	Inf	28.2843	0	89.4427	2.09768	56.5685	0		0	93.9451	244.934	0	77.2936	162.137	9.24011	0
Cell 2	100	7.89088	20	0	72.111	1.93314	72.111	NaN		13.9649	110.195	197.097	0	147.264	284.682	0	0
Cell 2	101.98	0	28.2843	0	56.5685	2.40977	89.4427	NaN		18.8599	0	82.5425	0	153.898	370.86	0	0
Cell 2	107.703	NaN	44.7214	0	44.7214	2.4992	107.703	NaN		0	0	14.2083	0	135.242	337.998	0	0
Cell 3	101.98	Inf	101.98	0.381286	141.421	NaN	28.2843	0.994339		0	66.7925	106.867	40.7469	0	0	392.543	390.321
Cell 3	82.4621	3.37756	107.703	0.283141	128.062	NaN	44.7214	0.803393		56.1409	189.619	61.7084	17.4722	0	0	374.1	300.549
Cell 3	63.2456	1.63264	116.619	0	116.619	Inf	63.2456	0.893379		209.841	342.596	20.8509	0	0	47.8403	198.552	177.382
Cell 3	44.7214	1.17104	128.062	NaN	107.703	Inf	82.4621	1.26611		391.021	457.903	0	0	0	95.9206	64.8906	82.1589
Cell 3	28.2843	1.16332	141.421	NaN	101.98	Inf	101.98	NaN		435.827	507.004	0	0	0	151.402	0	0
Cell 3	107.703	10.0499	82.4621	0.849491	128.062	NaN	44.7214	0.820712		7.36505	74.0178	186.542	158.466	0	0	443.757	364.197
Cell 3	89.4427	1.74423	89.4427	0.372533	113.137	NaN	56.5685	1.08783		129.911	226.595	114.412	42.6222	0	0	319.689	347.768
Cell 3	72.111	1.22579	100	0.86839	100	57.8919	72.111	0.935387		288.434	353.56	64.3685	55.897	2.03381	117.741	178.039	166.535
Cell 3	56.5685	0.948968	113.137	0	89.4427	13.4343	89.4427	1.36812		456.494	433.199	30.697	0	14.9645	201.038	66.0928	90.4225
Cell 3	44.7214	0.828011	128.062	0	82.4621	3.5066	107.703	NaN		509.335	421.735	3.40886	0	73.4283	257.483	0	0
Cell 3	116.619	0	63.2456	0.730849	116.619	NaN	63.2456	0.896451		30.3756	0	292.035	213.434	0	0	326.907	293.056
Cell 3	100	1.31438	72.111	0.462382	100	Inf	72.111	0.983967		145.227	190.883	231.666	107.118	0	36.2752	230.735	227.035
Cell 3	84.8528	0.671611	84.8528	0.652198	84.8528	2.07835	84.8528	1.10946		310.606	208.606	104.991	68.4751	35.3387	73.4463	103.334	114.644
Cell 3	72.111	0.888381	100	0.25987	72.111	4.75868	100	6.57202		421.072	374.072	65.6498	17.0604	91.5106	435.47	9.67751	63.6007
Cell 3	63.2456	0.994505	116.619	0	63.2456	2.27345	116.619	NaN		379.204	377.121	3.96835	0	197.07	448.029	0	0
Cell 3	128.062	0	44.7214	1.37069	107.703	Inf	82.4621	0.729817		43.6623	0	373.346	511.741	0	60.6732	123.738	90.3061
Cell 3	113.137	0.825307	56.5685	1.16949	89.4427	81.3205	89.4427	0		145.987	120.484	244.022	285.381	2.30164	187.17	64.3099	0
Cell 3	100	0.844447	72.111	0.334761	72.111	4.25522	100	14.8242		235.218	198.629	173.657	58.1335	65.6886	279.519	4.17172	61.8423
Cell 3	89.4427	0.889963	89.4427	0.608414	56.5685	2.21995	113.137	NaN		280.919	250.007	77.6879	47.2665	181.737	403.447	0	0
Cell 3	82.4621	1.29637	107.703	NaN	44.7214	1.70473	128.062	NaN		249.66	323.653	0	0	320.456	546.291	0	0
Cell 3	141.421	0	28.2843	1.01147	101.98	Inf	101.98	1.53194		9.56105	0	377.537	381.865	0	62.0664	49.4501	75.7545
Cell 3	128.062	1.51223	44.7214	0.569458	82.4621	11.1473	107.703	NaN		70.4559	106.545	330.446	188.175	11.2914	125.869	0	0
Cell 3	116.619	1.37034	63.2456	0.452883	63.2456	4.02504	116.619	NaN		101.123	138.572	208.101	94.2453	69.1129	278.182	0	0
Cell 3	107.703	1.19692	82.4621	0.849399	44.7214	2.7465	128.062	NaN		149.284	178.68	51.9459	44.1228	203.64	559.297	0	0
Cell 3	101.98	1.19713	101.98	2.53903	28.2843	1.83245	141.421	NaN		135.031	161.65	13.541	34.381	296.366	543.077	0	0
Cell 4	101.98	NaN	101.98	0	141.421	NaN	28.2843	0.938249		0	0	32.6362	0	0	0	282.021	264.606
Cell 4	82.4621	Inf	107.703	0	128.062	NaN	44.7214	0.215369		0	19.6847	32.5564	0	0	0	263.851	56.8254
Cell 4	63.2456	0.272039	116.619	0	116.619	NaN	63.2456	0.644533		74.6478	20.3071	33.0334	0	0	0	151.593	97.7068
Cell 4	44.7214	0.182176	128.062	0	107.703	NaN	82.4621	1.28407		227.76	41.4924	7.67929	0	0	0	68.755	88.2865
Cell 4	28.2843	0.505296	141.421	NaN	101.98	NaN	101.98	6.51457		303.014	153.112	0	0	0	0	3.84502	25.0486
Cell 4	107.703	NaN	82.4621	0	128.062	NaN	44.7214	0.349978		0	0	93.293	0	0	0	354.152	123.945
Cell 4	89.4427	0	89.4427	0	113.137	NaN	56.5685	0.306938		27.9282	0	115.422	0	0	0	290.776	89.2504
Cell 4	72.111	0	100	0.982101	100	0	72.111	1.00805		128.723	0	64.8115	63.6514	30.6855	0	146.831	148.013
Cell 4	56.5685	0	113.137	0	89.4427	0	89.4427	3.19446		277.653	0	23.3161	0	40.6807	0	39.1888	125.187
Cell 4	44.7214	0.268707	128.062	NaN	82.4621	0	107.703	NaN		368.846	99.1117	0	0	51.8719	0	0	0
Cell 4	116.619	NaN	63.2456	0	116.619	NaN	63.2456	0.444839		0	0	217.33	0	0	0	420.267	186.951
Cell 4	100	0	72.111	0.434779	100	0	72.111	0.710509		30.9417	0	173.769	75.5511	11.5194	0	284.108	201.861
Cell 4	84.8528	0	84.8528	1.1005	84.8528	0	84.8528	0.732994		143.943	0	76.9525	84.686	59.1142	0	116.768	85.5905
Cell 4	72.111	0	100	0.545598	72.111	0	100	8.82		281.7	0	31.7505	17.323	116.466	0	14.0513	123.933
Cell 4	63.2456	0	116.619	NaN	63.2456	0	116.619	Inf		361.581	0	0	0	153.969	0	0	21.6317
Cell 4	128.062	NaN	44.7214	0.404947	107.703	NaN	82.4621	0.452973		0	0	280.46	113.572	0	0	331.676	150.241
Cell 4	113.137	0	56.5685	0.572353	89.4427	0	89.4427	0.952672		15.7173	0	202.829	116.09	24.883	0	242.009	230.555
Cell 4	100	0	72.111	1.28206	72.111	0	100	1.4984		104.181	0	80.8412	103.643	96.4977	0	115.123	172.501
Cell 4	89.4427	0	89.4427	Inf	56.5685	0.317144	113.137	0		195.186	0	0	63.4617	224.963	71.3457	18.245	0
Cell 4	82.4621	0.333345	107.703	NaN	44.7214	0	128.062	NaN		262.8	87.603	0	0	256.187	0	0	0
Cell 4	141.421	NaN	28.2843	0.387992	101.98	NaN	101.98	0.989591		0	0	294.808	114.383	0	0	170.13	168.359
Cell 4	128.062	NaN	44.7214	0.746281	82.4621	0	107.703	1.05968		0	0	175.923	131.288	10.4331	0	122.912	130.247
Cell 4	116.619	0	63.2456	0.868487	63.2456	0.505051	116.619	0		25.1383	0	97.4199	84.6079	94.3574	47.6553	45.45	0
Cell 4	107.703	0	82.4621	0	44.7214	0.423911	128.062	0		106.564	0	9.58447	0	218.768	92.7382	23.1861	0
Cell 4	101.98	0.778047	101.98	NaN	28.2843	0.558135	141.421	NaN		135.934	105.763	0	0	295.305	164.82	0	0
Cell 5	101.98	0	101.98	0	141.421	NaN	28.2843	1.80163		47.6259	0	7.35633	0	0	0	291.252	524.73
Cell 5	82.4621	0	107.703	NaN	128.062	NaN	44.7214	2.0811		91.5651	0	0	0	0	0	287.769	598.875
Cell 5	63.2456	0	116.619	0	116.619	NaN	63.2456	1.88739		148.223	0	8.62557	0	0	0	319.869	603.718
Cell 5	44.7214	0.284807	128.062	0	107.703	NaN	82.4621	2.06039		240.051	68.3682	43.3979	0	0	0	287.45	592.26
Cell 5	28.2843	0.576183	141.421	0	101.98	NaN	101.98	2.34284		258.227	148.786	61.8606	0	0	0	208.747	489.062
Cell 5	107.703	0	82.4621	0	128.062	NaN	44.7214	1.95428		4.2066	0	70.6567	0	0	0	270.179	528.006
Cell 5	89.4427	0	89.4427	3.50328	113.137	NaN	56.5685	2.0104		80.9571	0	51.315	179.77	0	0	300.44	604.003
Cell 5	72.111	0.588221	100	2.20229	100	NaN	72.111	1.94799		192.95	113.497	71.5528	157.58	0	0	274.361	534.452
Cell 5	56.5685	0.520467	113.137	1.06072	89.4427	0	89.4427	2.60879		285.576	148.633	146.366	155.252	1.70484	0	222.55	580.586
Cell 5	44.7214	0.819899	128.062	0.962016	82.4621	0	107.703	2.85722		289.161	237.083	135.935	130.772	23.6622	0	161.26	460.756
Cell 5	116.619	NaN	63.2456	1.62407	116.619	NaN	63.2456	2.06524		0	0	161.749	262.692	0	0	250.488	517.317
Cell 5	100	0	72.111	1.54798	100	NaN	72.111	1.99155		38.0957	0	176.443	273.13	0	0	267.604	532.947
Cell 5	84.8528	0.985377	84.8528	1.6784	84.8528	NaN	84.8528	2.40294		135.092	133.116	174.94	293.619	0	0	179.067	430.287
Cell 5	72.111	0.799879	100	1.07049	72.111	5.30326	100	4.16502		211.805	169.419	238.17	254.959	14.5417	77.1185	122.572	510.513
Cell 5	63.2456	1.28994	116.619	1.32068	63.2456	1.28449	116.619	5.40235		234.14	302.028	183.832	242.783	96.5577	124.027	72.4889	391.61
Cell 5	128.062	NaN	44.7214	1.30673	107.703	NaN	82.4621	3.5136		0	0	285.917	373.617	0	0	177.623	624.096
Cell 5	113.137	11.0997	56.5685	2.09688	89.4427	NaN	89.4427	2.93471		7.11527	78.9771	245.391	514.556	0	0	173.542	509.296
Cell 5	100	1.46682	72.111	1.6557	72.111	NaN	100	6.13216		91.3365	133.975	274.722	454.858	0	0	74.0787	454.262
Cell 5	89.4427	1.41447	89.4427	1.41311	56.5685	6.97458	113.137	12.7992		188.305	266.352	277.436	392.048	12.6084	87.9381	32.0587	410.325
Cell 5	82.4621	2.22895	107.703	1.24588	44.7214	1.33952	128.062	15.8041		177.562	395.776	224.638	279.872	118.186	158.312	22.6136	357.388
Cell 5	141.421	NaN	28.2843	1.73459	101.98	0	101.98	3.25044		0	0	299.461	519.44	20.5391	0	139.078	452.063
Cell 5	128.062	Inf	44.7214	1.77689	82.4621	0	107.703	3.2744		0	102.598	313.51	557.073	17.7475	0	122.747	401.922
Cell 5	116.619	2.0885	63.2456	1.91833	63.2456	NaN	116.619	13.3962		58.1126	121.368	315.333	604.912	0	0	24.5235	328.521
Cell 5	107.703	1.95412	82.4621	1.90666	44.7214	3.10911	128.062	44.9596		127.774	249.686	262.479	500.457	36.896	114.714	4.84897	218.008
Cell 5	101.98	2.77698	101.98	2.02661	28.2843	1.84843	141.421	Inf		135.688	376.803	207.276	420.067	116.307	214.986	0	202.44
Cell 6	44.7214	2.95121	107.703	NaN	107.703	NaN	44.7214	0		28.661	84.5846	0	0	0	0	75.3829	0
Cell 6	28.2843	0.983884	101.98	NaN	89.4427	NaN	56.5685	0		79.8243	78.5378	0	0	0	0	71.7079	0
Cell 6	20	0.774339	100	NaN	72.111	NaN	72.111	0		119.104	92.2267	0	0	0	0	53.5388	0
Cell 6	28.2843	0.561431	101.98	NaN	56.5685	NaN	89.4427	0		171.751	96.4262	0	0	0	0	81.8353	0
Cell 6	44.7214	0.632394	107.703	NaN	44.7214	Inf	107.703	0		172.797	109.276	0	0	0	45.2067	70.3837	0
Cell 6	56.5685	1.36231	89.4427	NaN	101.98	NaN	28.2843	0.461255		65.6906	89.4911	0	0	0	0	129.882	59.9085
Cell 6	44.7214	0.834566	82.4621	NaN	82.4621	NaN	44.7214	0		165.499	138.12	0	0	0	0	155.902	0
Cell 6	40	0.533551	80	NaN	63.2456	NaN	63.2456	0		254.71	135.901	0	0	0	0	130.017	0
Cell 6	44.7214	0.63935	82.4621	NaN	44.7214	Inf	82.4621	0		261.611	167.261	0	0	0	93.9077	109.037	0
Cell 6	56.5685	0.464138	89.4427	NaN	28.2843	12.7913	101.98	0		237.425	110.198	0	0	9.03219	115.533	104.869	0
Cell 6	72.111	0.549338	72.111	NaN	100	NaN	20	0.610871		140.49	77.1764	0	0	0	0	157.749	96.3643
Cell 6	63.2456	0.651982	63.2456	NaN	80	NaN	40	0.309988		227.098	148.064	0	0	0	0	167.574	51.946
Cell 6	60	0.961384	60	NaN	60	NaN	60	0		293.051	281.735	0	0	0	0	120.219	0
Cell 6	63.2456	0.496569	63.2456	0	40	Inf	80	0		241.486	119.915	9.16216	0	0	78.4717	124.482	0
Cell 6	72.111	0.508687	72.111	0	20	5.13389	100	0		257.168	130.818	7.71082	0	14.2937	73.3821	118.098	0
Cell 6	89.4427	0.804439	56.5685	NaN	101.98	NaN	28.2843	0.561431		118.049	94.9631	0	0	0	0	171.751	96.4262
Cell 6	82.4621	0.639242	44.7214	Inf	82.4621	NaN	44.7214	0.632394		147.861	94.5189	0	45.2067	0	0	172.797	109.276
Cell 6	80	1.202	40	2.06348	63.2456	Inf	63.2456	0		177.839	213.762	21.4329	44.2263	0	88.8672	187.236	0
Cell 6	82.4621	1.20757	44.7214	0	44.7214	2.95121	82.4621	0		123.194	148.766	75.3829	0	28.661	84.5846	123.714	0
Cell 6	89.4427	0	56.5685	0	28.2843	0.983884	101.98	0		139.012	0	71.7079	0	79.8243	78.5378	79.0677	0
Cell 6	107.703	1.17176	44.7214	Inf	107.703	NaN	44.7214	0.63935		78.9544	92.5157	0	93.9077	0	0	261.611	167.261
Cell 6	101.98	1.50422	28.2843	12.7913	89.4427	Inf	56.5685	0.464138		92.549	139.214	9.03219	115.533	0	47.5591	237.425	110.198
Cell 6	100	5.82838	20	0	72.111	Inf	72.111	0.42278		12.4111	72.3368	72.1076	0	0	57.9834	171.994	72.7158
Cell 6	101.98	7.8907	28.2843	0.461255	56.5685	1.36231	89.4427	1.02766		21.1807	167.13	129.882	59.9085	65.6906	89.4911	99.6122	102.367
Cell 6	107.703	3.74199	44.7214	0	44.7214	0.834566	107.703	0		26.0616	97.5223	155.902	0	165.499	138.12	33.0783	0
Cell 7	101.98	0.717613	101.98	NaN	141.421	NaN	28.2843	1.90824		218.012	156.448	0	0	0	0	20.9216	39.9234
Cell 7	82.4621	0.779894	107.703	NaN	128.062	NaN	44.7214	NaN		326.138	254.353	0	0	0	0	0	0
Cell 7	63.2456	0.787804	116.619	NaN	116.619	0	63.2456	NaN		367.344	289.395	0	0	7.87259	0	0	0
Cell 7	44.7214	0.786775	128.062	NaN	107.703	0	82.4621	NaN		280.905	221.009	0	0	16.9993	0	0	0
Cell 7	28.2843	0.45408	141.421	NaN	101.98	NaN	101.98	NaN		155.505	70.6118	0	0	0	0	0	0
Cell 7	107.703	1.16053	82.4621	NaN	128.062	NaN	44.7214	5.5307		162.296	188.35	0	0	0	0	7.68266	42.4905
Cell 7	89.4427	1.06264	89.4427	NaN	113.137	NaN	56.5685	NaN		231.782	246.302	0	0	0	0	0	0
Cell 7	72.111	0.835625	100	NaN	100	0	72.111	NaN		273.736	228.741	0	0	38.4636	0	0	0
Cell 7	56.5685	0.886383	113.137	NaN	89.4427	0	89.4427	NaN		185.065	164.038	0	0	111.374	0	0	0
Cell 7	44.7214	1.09159	128.062	NaN	82.4621	0	107.703	NaN		75.3884	82.2935	0	0	89.1259	0	0	0
Cell 7	116.619	1.9151	63.2456	0	116.619	0	63.2456	NaN		80.6602	154.472	8.87951	0	5.98803	0	0	0
Cell 7	100	1.37589	72.111	NaN	100	0	72.111	NaN		130.12	179.031	0	0	26.0247	0	0	0
Cell 7	84.8528	1.10905	84.8528	NaN	84.8528	0	84.8528	NaN		174.583	193.62	0	0	141.016	0	0	0
Cell 7	72.111	1.64699	100	NaN	72.111	0	100	NaN		114.851	189.159	0	0	187.999	0	0	0
Cell 7	63.2456	2.08833	116.619	NaN	63.2456	0	116.619	NaN		49.8606	104.126	0	0	160.258	0	0	0
Cell 7	128.062	3.76789	44.7214	0	107.703	0.542696	82.4621	NaN		36.6182	137.973	31.5015	0	84.227	45.7096	0	0
Cell 7	113.137	2.95653	56.5685	0	89.4427	0.361332	89.4427	NaN		61.2755	181.163	9.37014	0	154.379	55.7821	0	0
Cell 7	100	2.31113	72.111	NaN	72.111	0.381989	100	NaN		67.0871	155.047	0	0	240.26	91.7766	0	0
Cell 7	89.4427	2.12143	89.4427	NaN	56.5685	0.19091	113.137	NaN		54.6437	115.923	0	0	242.13	46.225	0	0
Cell 7	82.4621	3.50363	107.703	NaN	44.7214	0	128.062	NaN		19.6492	68.8436	0	0	211.97	0	0	0
Cell 7	141.421	5.59887	28.2843	1.241	101.98	0.348582	101.98	NaN		10.2901	57.6131	32.5341	40.3749	167.767	58.4807	0	0
Cell 7	128.062	9.62325	44.7214	0	82.4621	0.467448	107.703	NaN		10.2901	99.0245	11.342	0	254.353	118.897	0	0
Cell 7	116.619	4.76219	63.2456	NaN	63.2456	0.335446	116.619	NaN		24.7225	117.733	0	0	350.953	117.726	0	0
Cell 7	107.703	3.85931	82.4621	NaN	44.7214	0.305896	128.062	NaN		24.7225	95.4116	0	0	287.984	88.0931	0	0
Cell 7	101.98	24.7031	101.98	NaN	28.2843	0.311139	141.421	NaN		2.57625	63.6415	0	0	186.47	58.0181	0	0
Cell 8	44.7214	1.39452	107.703	NaN	107.703	NaN	44.7214	0		110.185	153.656	0	0	0	0	179.751	0
Cell 8	28.2843	1.20581	101.98	NaN	89.4427	NaN	56.5685	0		179.829	216.839	0	0	0	0	253.06	0
Cell 8	20	0.871598	100	NaN	72.111	0	72.111	0		264.892	230.88	0	0	11.7132	0	196.685	0
Cell 8	28.2843	0.850746	101.98	0	56.5685	0	89.4427	0		292.895	249.18	4.85484	0	102.424	0	86.6366	0
Cell 8	44.7214	0.591154	107.703	0	44.7214	0	107.703	0		285.864	168.99	19.3614	0	173.05	0	10.2464	0
Cell 8	56.5685	3.04418	89.4427	NaN	101.98	NaN	28.2843	0.414482		74.9441	228.144	0	0	0	0	247.657	102.649
Cell 8	44.7214	1.11657	82.4621	0	82.4621	NaN	44.7214	0.376085		169.597	189.367	1.91437	0	0	0	253.364	95.2864
Cell 8	40	1.19813	80	0	63.2456	0	63.2456	0.481181		221.97	265.949	14.1189	0	33.2825	0	194.039	93.3681
Cell 8	44.7214	0.79047	82.4621	0	44.7214	0	82.4621	0		332.864	263.119	47.9717	0	106.488	0	92.6052	0
Cell 8	56.5685	0.67658	89.4427	0	28.2843	0.313053	101.98	0		316.524	214.154	63.6621	0	197.281	61.7594	14.9048	0
Cell 8	72.111	16.8608	72.111	0	100	NaN	20	0.428531		9.54933	161.01	28.4693	0	0	0	262.847	112.638
Cell 8	63.2456	1.91579	63.2456	0	80	NaN	40	0.380761		88.2336	169.037	79.7362	0	0	0	248.724	94.7043
Cell 8	60	1.25437	60	0	60	0	60	0		163.246	204.772	107.635	0	15.0689	0	192.641	0
Cell 8	63.2456	0.878034	63.2456	0	40	0.699143	80	0		295.733	259.664	121.697	0	123.787	86.5447	95.8616	0
Cell 8	72.111	0.816552	72.111	0	20	0.523511	100	0		293.101	239.332	125.921	0	219.726	115.029	11.8659	0
Cell 8	89.4427	Inf	56.5685	0	101.98	NaN	28.2843	0.850746		0	124.054	102.424	0	0	0	292.895	249.18
Cell 8	82.4621	9.09757	44.7214	0	82.4621	NaN	44.7214	0.591154		20.0801	182.681	173.05	0	0	0	285.864	168.99
Cell 8	80	3.02426	40	0.349636	63.2456	2.13112	63.2456	0.880036		54.8267	165.81	206.227	72.1044	27.976	59.6204	156.323	137.57
Cell 8	82.4621	1.74907	44.7214	0	44.7214	1.39452	82.4621	1.45053		138.017	241.4	179.751	0	110.185	153.656	65.5025	95.013
Cell 8	89.4427	1.31668	56.5685	0	28.2843	1.20581	101.98	4.5979		238.486	314.008	253.06	0	179.829	216.839	14.4062	66.2384
Cell 8	107.703	NaN	44.7214	0	107.703	NaN	44.7214	0.79047		0	0	106.488	0	0	0	332.864	263.119
Cell 8	101.98	Inf	28.2843	0.313053	89.4427	NaN	56.5685	0.67658		0	62.8521	197.281	61.7594	0	0	316.524	214.154
Cell 8	100	Inf	20	0.288302	72.111	3.79443	72.111	0.778219		0	118.381	255.716	73.7234	18.0269	68.4016	201.317	156.669
Cell 8	101.98	5.66711	28.2843	0.414482	56.5685	3.04418	89.4427	3.1452		25.6282	145.238	247.657	102.649	74.9441	228.144	41.2497	129.738
Cell 8	107.703	1.86118	44.7214	0.376085	44.7214	1.11657	107.703	Inf		119.126	221.716	253.364	95.2864	169.597	189.367	0	82.1674
Cell 9	44.7214	1.05721	107.703	0	107.703	0	44.7214	1.24783		395.394	418.016	112.029	0	49.1704	0	320.251	399.619
Cell 9	28.2843	1.73798	101.98	0	89.4427	1.25171	56.5685	1.14712		293.325	509.794	74.9716	0	113.773	142.411	249.047	285.686
Cell 9	20	0.918806	100	0	72.111	1.36661	72.111	2.46853		292.046	268.334	69.9652	0	200.398	273.867	91.7041	226.375
Cell 9	28.2843	1.66729	101.98	0	56.5685	1.31296	89.4427	3.89034		258.486	430.972	33.6872	0	291.33	382.503	30.831	119.943
Cell 9	44.7214	1.72934	107.703	0	44.7214	1.35884	107.703	NaN		160.732	277.96	24.8203	0	305.259	414.798	0	0
Cell 9	56.5685	0.74086	89.4427	0.456581	101.98	2.16125	28.2843	1.50697		297.949	220.739	242.619	110.775	49.4906	106.961	302.529	455.903
Cell 9	44.7214	1.19687	82.4621	0.355397	82.4621	1.16038	44.7214	1.37387		243.893	291.909	206.585	73.4197	181.569	210.689	241.429	331.691
Cell 9	40	1.50125	80	0.579945	63.2456	1.03621	63.2456	1.46702		245.138	368.013	173.039	100.353	290.093	300.598	122.967	180.396
Cell 9	44.7214	2.44914	82.4621	0	44.7214	1.12124	82.4621	11.4411		156.667	383.7	126.295	0	338.18	379.182	12.5883	144.023
Cell 9	56.5685	3.0478	89.4427	0	28.2843	1.59214	101.98	Inf		121.566	370.51	72.3331	0	303.867	483.798	0	131.799
Cell 9	72.111	1.81207	72.111	0.708293	100	1.65129	20	1.9819		180.571	327.206	249.324	176.595	53.0625	87.6215	258.18	511.685
Cell 9	63.2456	2.98763	63.2456	0.976583	80	1.06728	40	1.6031		117.819	351.999	300.212	293.182	160.028	170.794	208.135	333.661
Cell 9	60	3.04599	60	0.96296	60	0.954406	60	1.83185		125.865	383.383	289.954	279.214	341.284	325.724	91.4688	167.558
Cell 9	63.2456	4.23206	63.2456	0.736385	40	0.987125	80	Inf		95.8358	405.583	229.297	168.851	422.526	417.086	0	141.589
Cell 9	72.111	5.47765	72.111	0.346739	20	1.59313	100	Inf		60.0905	329.155	167.903	58.2184	330.012	525.751	0	105.257
Cell 9	89.4427	6.32389	56.5685	1.31296	101.98	1.42823	28.2843	1.66729		54.2607	343.139	291.33	382.503	87.4028	124.832	258.486	430.972
Cell 9	82.4621	7.58527	44.7214	1.35884	82.4621	0.585612	44.7214	1.72934		49.3609	374.416	305.259	414.798	206.131	120.713	160.732	277.96
Cell 9	80	11.8842	40	1.36035	63.2456	0.798396	63.2456	7.81259		39.9491	474.761	316.012	429.887	338.295	270.093	37.7046	294.571
Cell 9	82.4621	26.0852	44.7214	1.24783	44.7214	1.05721	82.4621	39.7643		11.7379	306.186	320.251	399.619	395.394	418.016	6.26372	249.073
Cell 9	89.4427	Inf	56.5685	1.14712	28.2843	1.73798	101.98	Inf		0	292.321	249.047	285.686	293.325	509.794	0	173.506
Cell 9	107.703	196.779	44.7214	1.12124	107.703	1.71865	44.7214	2.44914		1.41987	279.401	338.18	379.182	65.2978	112.224	156.667	383.7
Cell 9	101.98	Inf	28.2843	1.59214	89.4427	0.626605	56.5685	3.0478		0	343.368	303.867	483.798	188.079	117.851	121.566	370.51
Cell 9	100	Inf	20	1.66602	72.111	1.02745	72.111	8.96415		0	299.55	310.465	517.241	254.596	261.584	31.9977	286.832
Cell 9	101.98	Inf	28.2843	1.50697	56.5685	0.74086	89.4427	Inf		0	270.929	302.529	455.903	297.949	220.739	0	217.288
Cell 9	107.703	Inf	44.7214	1.37387	44.7214	1.19687	107.703	Inf		0	194.726	241.429	331.691	243.893	291.909	0	116.883

## Sheet: F
Off	Distance Pref side	Pref amp/dend len	Distance Null side	Null amp/dend len	Distance Pref + 90	Pref + 90 amp/dend len	Distance Pref -90	Pref-90 amp/den len		Pref den len	Pref amp	Null den len	Null amp	Pref + 90 len	Pref + 90 amp	Pref -90 len	Pref-90 amp
Cell 1	101.98	5.67122	101.98	NaN	141.421	NaN	28.2843	1.43999		19.5037	110.61	0	0	0	0	350.816	505.172
Cell 1	82.4621	5.17767	107.703	NaN	128.062	NaN	44.7214	1.13685		34.9315	180.864	0	0	0	0	329.907	375.053
Cell 1	63.2456	2.00803	116.619	NaN	116.619	NaN	63.2456	1.0268		178.365	358.162	0	0	0	0	308.567	316.836
Cell 1	44.7214	1.74565	128.062	NaN	107.703	NaN	82.4621	1.85515		276.429	482.55	0	0	0	0	142.456	264.276
Cell 1	28.2843	1.51747	141.421	NaN	101.98	NaN	101.98	4.47112		355.078	538.82	0	0	0	0	39.9573	178.654
Cell 1	107.703	0	82.4621	0	128.062	NaN	44.7214	1.06336		22.7668	0	18.7652	0	0	0	358.939	381.681
Cell 1	89.4427	1.50266	89.4427	0	113.137	NaN	56.5685	1.19567		106.768	160.436	7.4899	0	0	0	295.824	353.708
Cell 1	72.111	1.7489	100	0	100	NaN	72.111	1.40771		224.669	392.924	8.17976	0	0	0	218.924	308.182
Cell 1	56.5685	1.84679	113.137	NaN	89.4427	NaN	89.4427	2.12882		332.986	614.956	0	0	0	0	107.988	229.887
Cell 1	44.7214	1.53947	128.062	NaN	82.4621	0	107.703	1.96017		414.089	637.475	0	0	17.5973	0	35.6856	69.95
Cell 1	116.619	0	63.2456	2.21283	116.619	NaN	63.2456	1.09765		29.1906	0	54.8055	121.275	0	0	285.344	313.21
Cell 1	100	1.74758	72.111	3.14326	100	NaN	72.111	1.52259		112.467	196.544	37.9041	119.142	0	0	208.384	317.283
Cell 1	84.8528	1.88513	84.8528	2.53301	84.8528	NaN	84.8528	1.73301		239.51	451.508	41.4286	104.939	0	0	129.412	224.272
Cell 1	72.111	1.70342	100	0	72.111	2.35782	100	2.83839		312.681	532.628	10.1611	0	35.2543	83.1235	67.5373	191.697
Cell 1	63.2456	1.84681	116.619	NaN	63.2456	1.4585	116.619	5.55683		321.045	592.909	0	0	68.9124	100.509	21.493	119.433
Cell 1	128.062	0	44.7214	2.23819	107.703	NaN	82.4621	1.64622		14.209	0	116.546	260.851	0	0	170.891	281.323
Cell 1	113.137	1.76518	56.5685	1.6401	89.4427	NaN	89.4427	2.01747		76.5324	135.094	142.035	232.952	0	0	111.506	224.96
Cell 1	100	2.62665	72.111	1.45202	72.111	3.31846	100	5.15554		133.853	351.585	140.347	203.787	25.3783	84.2169	35.9319	185.248
Cell 1	89.4427	2.59375	89.4427	2.24804	56.5685	1.18789	113.137	Inf		155.261	402.707	61.254	137.702	104.246	123.833	0	83.1473
Cell 1	82.4621	1.8052	107.703	Inf	44.7214	1.31413	128.062	Inf		217.245	392.172	0	95.5692	133.591	175.555	0	72.6754
Cell 1	141.421	Inf	28.2843	1.73915	101.98	NaN	101.98	2.97463		0	86.6324	181.093	314.948	0	0	81.3886	242.101
Cell 1	128.062	Inf	44.7214	1.15609	82.4621	13.1309	107.703	4.33884		0	116	266.353	307.928	5.78449	75.9557	35.4446	153.789
Cell 1	116.619	7.03485	63.2456	1.12492	63.2456	2.17934	116.619	13.7173		36.3892	255.993	238.685	268.501	75.9012	165.414	8.44963	115.907
Cell 1	107.703	4.55197	82.4621	1.60377	44.7214	1.09387	128.062	Inf		50.798	231.231	148.33	237.887	152.39	166.695	0	82.2025
Cell 1	101.98	5.16951	101.98	7.42146	28.2843	1.22221	141.421	NaN		70.5472	364.694	18.5975	138.021	210.665	257.479	0	0
Cell 2	44.7214	1.56933	107.703	NaN	107.703	0	44.7214	0		261.252	409.992	0	0	25.9744	0	118.725	0
Cell 2	28.2843	1.35118	101.98	0	89.4427	0	56.5685	0		247.611	334.568	1.78227	0	32.3576	0	20.6501	0
Cell 2	20	1.33478	100	0	72.111	0	72.111	NaN		163.231	217.877	20.1653	0	19.0664	0	0	0
Cell 2	28.2843	0	101.98	0	56.5685	0	89.4427	NaN		73.064	0	20.1653	0	66.2496	0	0	0
Cell 2	44.7214	NaN	107.703	NaN	44.7214	0	107.703	NaN		0	0	0	0	150.826	0	0	0
Cell 2	56.5685	2.40977	89.4427	NaN	101.98	0	28.2843	0		153.898	370.86	0	0	60.143	0	82.5425	0
Cell 2	44.7214	2.4992	82.4621	0	82.4621	0	44.7214	0		135.242	337.998	13.7217	0	115.222	0	14.2083	0
Cell 2	40	3.45004	80	0	63.2456	0	63.2456	NaN		115.184	397.389	54.1658	0	166.666	0	0	0
Cell 2	44.7214	1.79595	82.4621	0	44.7214	0	82.4621	NaN		36.8104	66.1098	57.6864	0	209.526	0	0	0
Cell 2	56.5685	0	89.4427	0	28.2843	0	101.98	NaN		9.24011	0	16.6371	0	244.934	0	0	0
Cell 2	72.111	14.0065	72.111	NaN	100	0.420914	20	0		23.2453	325.585	0	0	60.143	25.3151	76.2755	0
Cell 2	63.2456	12.3516	63.2456	0	80	0	40	0		27.6842	341.945	44.65	0	165.025	0	4.73812	0
Cell 2	60	1.73595	60	0	60	0	60	NaN		55.3309	96.0519	110.653	0	241.278	0	0	0
Cell 2	63.2456	2.822	63.2456	0	40	0.991898	80	NaN		33.821	95.4426	80.0189	0	308.35	305.852	0	0
Cell 2	72.111	0	72.111	0	20	0.795336	100	NaN		9.34479	0	34.9421	0	302.469	240.564	0	0
Cell 2	89.4427	Inf	56.5685	0	101.98	1.90247	28.2843	0		0	135.077	66.2496	0	66.545	126.6	73.064	0
Cell 2	82.4621	9.88376	44.7214	0	82.4621	0.508474	44.7214	NaN		8.30643	82.0988	150.826	0	138.94	70.6475	0	0
Cell 2	80	2.53041	40	0	63.2456	0.913553	63.2456	NaN		22.0618	55.8254	170.495	0	250.06	228.443	0	0
Cell 2	82.4621	2.47735	44.7214	0	44.7214	1.56933	82.4621	NaN		22.0618	54.6548	118.725	0	261.252	409.992	0	0
Cell 2	89.4427	0	56.5685	0	28.2843	1.35118	101.98	NaN		13.7554	0	20.6501	0	247.611	334.568	0	0
Cell 2	107.703	NaN	44.7214	0	107.703	2.93782	44.7214	1.79595		0	0	209.526	0	41.9799	123.33	36.8104	66.1098
Cell 2	101.98	Inf	28.2843	0	89.4427	2.09768	56.5685	0		0	93.9451	244.934	0	77.2936	162.137	9.24011	0
Cell 2	100	7.89088	20	0	72.111	1.93314	72.111	NaN		13.9649	110.195	197.097	0	147.264	284.682	0	0
Cell 2	101.98	0	28.2843	0	56.5685	2.40977	89.4427	NaN		18.8599	0	82.5425	0	153.898	370.86	0	0
Cell 2	107.703	NaN	44.7214	0	44.7214	2.4992	107.703	NaN		0	0	14.2083	0	135.242	337.998	0	0
Cell 3	101.98	Inf	101.98	0.381286	141.421	NaN	28.2843	0.994339		0	66.7925	106.867	40.7469	0	0	392.543	390.321
Cell 3	82.4621	3.37756	107.703	0.283141	128.062	NaN	44.7214	0.803393		56.1409	189.619	61.7084	17.4722	0	0	374.1	300.549
Cell 3	63.2456	1.63264	116.619	0	116.619	Inf	63.2456	0.893379		209.841	342.596	20.8509	0	0	47.8403	198.552	177.382
Cell 3	44.7214	1.17104	128.062	NaN	107.703	Inf	82.4621	1.26611		391.021	457.903	0	0	0	95.9206	64.8906	82.1589
Cell 3	28.2843	1.16332	141.421	NaN	101.98	Inf	101.98	NaN		435.827	507.004	0	0	0	151.402	0	0
Cell 3	107.703	10.0499	82.4621	0.849491	128.062	NaN	44.7214	0.820712		7.36505	74.0178	186.542	158.466	0	0	443.757	364.197
Cell 3	89.4427	1.74423	89.4427	0.372533	113.137	NaN	56.5685	1.08783		129.911	226.595	114.412	42.6222	0	0	319.689	347.768
Cell 3	72.111	1.22579	100	0.86839	100	57.8919	72.111	0.935387		288.434	353.56	64.3685	55.897	2.03381	117.741	178.039	166.535
Cell 3	56.5685	0.948968	113.137	0	89.4427	13.4343	89.4427	1.36812		456.494	433.199	30.697	0	14.9645	201.038	66.0928	90.4225
Cell 3	44.7214	0.828011	128.062	0	82.4621	3.5066	107.703	NaN		509.335	421.735	3.40886	0	73.4283	257.483	0	0
Cell 3	116.619	0	63.2456	0.730849	116.619	NaN	63.2456	0.896451		30.3756	0	292.035	213.434	0	0	326.907	293.056
Cell 3	100	1.31438	72.111	0.462382	100	Inf	72.111	0.983967		145.227	190.883	231.666	107.118	0	36.2752	230.735	227.035
Cell 3	84.8528	0.671611	84.8528	0.652198	84.8528	2.07835	84.8528	1.10946		310.606	208.606	104.991	68.4751	35.3387	73.4463	103.334	114.644
Cell 3	72.111	0.888381	100	0.25987	72.111	4.75868	100	6.57202		421.072	374.072	65.6498	17.0604	91.5106	435.47	9.67751	63.6007
Cell 3	63.2456	0.994505	116.619	0	63.2456	2.27345	116.619	NaN		379.204	377.121	3.96835	0	197.07	448.029	0	0
Cell 3	128.062	0	44.7214	1.37069	107.703	Inf	82.4621	0.729817		43.6623	0	373.346	511.741	0	60.6732	123.738	90.3061
Cell 3	113.137	0.825307	56.5685	1.16949	89.4427	81.3205	89.4427	0		145.987	120.484	244.022	285.381	2.30164	187.17	64.3099	0
Cell 3	100	0.844447	72.111	0.334761	72.111	4.25522	100	14.8242		235.218	198.629	173.657	58.1335	65.6886	279.519	4.17172	61.8423
Cell 3	89.4427	0.889963	89.4427	0.608414	56.5685	2.21995	113.137	NaN		280.919	250.007	77.6879	47.2665	181.737	403.447	0	0
Cell 3	82.4621	1.29637	107.703	NaN	44.7214	1.70473	128.062	NaN		249.66	323.653	0	0	320.456	546.291	0	0
Cell 3	141.421	0	28.2843	1.01147	101.98	Inf	101.98	1.53194		9.56105	0	377.537	381.865	0	62.0664	49.4501	75.7545
Cell 3	128.062	1.51223	44.7214	0.569458	82.4621	11.1473	107.703	NaN		70.4559	106.545	330.446	188.175	11.2914	125.869	0	0
Cell 3	116.619	1.37034	63.2456	0.452883	63.2456	4.02504	116.619	NaN		101.123	138.572	208.101	94.2453	69.1129	278.182	0	0
Cell 3	107.703	1.19692	82.4621	0.849399	44.7214	2.7465	128.062	NaN		149.284	178.68	51.9459	44.1228	203.64	559.297	0	0
Cell 3	101.98	1.19713	101.98	2.53903	28.2843	1.83245	141.421	NaN		135.031	161.65	13.541	34.381	296.366	543.077	0	0
Cell 4	44.7214	0.182176	107.703	NaN	107.703	NaN	44.7214	0.404947		227.76	41.4924	0	0	0	0	280.46	113.572
Cell 4	28.2843	0.505296	101.98	NaN	89.4427	0	56.5685	0.572353		303.014	153.112	0	0	24.883	0	202.829	116.09
Cell 4	20	0.720009	100	0	72.111	0	72.111	1.28206		321.763	231.672	1.92099	0	96.4977	0	80.8412	103.643
Cell 4	28.2843	0.938249	101.98	0	56.5685	0.317144	89.4427	Inf		282.021	264.606	32.6362	0	224.963	71.3457	0	63.4617
Cell 4	44.7214	0.215369	107.703	0	44.7214	0	107.703	NaN		263.851	56.8254	32.5564	0	256.187	0	0	0
Cell 4	56.5685	0	89.4427	0	101.98	NaN	28.2843	0.387992		277.653	0	40.6807	0	0	0	294.808	114.383
Cell 4	44.7214	0.268707	82.4621	0	82.4621	0	44.7214	0.746281		368.846	99.1117	51.8719	0	10.4331	0	175.923	131.288
Cell 4	40	0.507246	80	0	63.2456	0.505051	63.2456	0.868487		354.97	180.057	65.0387	0	94.3574	47.6553	97.4199	84.6079
Cell 4	44.7214	0.349978	82.4621	0	44.7214	0.423911	82.4621	0		354.152	123.945	93.293	0	218.768	92.7382	9.58447	0
Cell 4	56.5685	0.306938	89.4427	0	28.2843	0.558135	101.98	NaN		290.776	89.2504	115.422	0	295.305	164.82	0	0
Cell 4	72.111	0	72.111	0	100	NaN	20	0.748286		281.7	0	116.466	0	0	0	258.453	193.397
Cell 4	63.2456	0	63.2456	0	80	NaN	40	0.299271		361.581	0	153.969	0	0	0	224.677	67.2393
Cell 4	60	0.323367	60	0	60	0.7555	60	0.186464		380.356	122.995	169.116	0	65.5851	49.5496	120.348	22.4406
Cell 4	63.2456	0.444839	63.2456	0	40	0.478617	80	0		420.267	186.951	217.33	0	213.52	102.194	49.6989	0
Cell 4	72.111	0.710509	72.111	0.434779	20	0.523152	100	0		284.108	201.861	173.769	75.5511	303.186	158.612	3.84502	0
Cell 4	89.4427	0	56.5685	0.317144	101.98	NaN	28.2843	0.938249		195.186	0	224.963	71.3457	0	0	282.021	264.606
Cell 4	82.4621	0.333345	44.7214	0	82.4621	Inf	44.7214	0.215369		262.8	87.603	256.187	0	0	19.6847	263.851	56.8254
Cell 4	80	0.518038	40	0.418016	63.2456	0.272039	63.2456	0.644533		323.135	167.396	295.551	123.545	74.6478	20.3071	151.593	97.7068
Cell 4	82.4621	0.452973	44.7214	0.404947	44.7214	0.182176	82.4621	1.28407		331.676	150.241	280.46	113.572	227.76	41.4924	68.755	88.2865
Cell 4	89.4427	0.952672	56.5685	0.572353	28.2843	0.505296	101.98	6.51457		242.009	230.555	202.829	116.09	303.014	153.112	3.84502	25.0486
Cell 4	107.703	0	44.7214	0.423911	107.703	NaN	44.7214	0.349978		106.564	0	218.768	92.7382	0	0	354.152	123.945
Cell 4	101.98	0.778047	28.2843	0.558135	89.4427	0	56.5685	0.306938		135.934	105.763	295.305	164.82	27.9282	0	290.776	89.2504
Cell 4	100	0.539149	20	0.56947	72.111	0	72.111	1.00805		183.606	98.9908	309.417	176.204	128.723	0	146.831	148.013
Cell 4	101.98	0.989591	28.2843	0.387992	56.5685	0	89.4427	3.19446		170.13	168.359	294.808	114.383	277.653	0	39.1888	125.187
Cell 4	107.703	1.05968	44.7214	0.746281	44.7214	0.268707	107.703	NaN		122.912	130.247	175.923	131.288	368.846	99.1117	0	0
Cell 5	101.98	0	101.98	0	141.421	NaN	28.2843	1.80163		47.6259	0	7.35633	0	0	0	291.252	524.73
Cell 5	82.4621	0	107.703	NaN	128.062	NaN	44.7214	2.0811		91.5651	0	0	0	0	0	287.769	598.875
Cell 5	63.2456	0	116.619	0	116.619	NaN	63.2456	1.88739		148.223	0	8.62557	0	0	0	319.869	603.718
Cell 5	44.7214	0.284807	128.062	0	107.703	NaN	82.4621	2.06039		240.051	68.3682	43.3979	0	0	0	287.45	592.26
Cell 5	28.2843	0.576183	141.421	0	101.98	NaN	101.98	2.34284		258.227	148.786	61.8606	0	0	0	208.747	489.062
Cell 5	107.703	0	82.4621	0	128.062	NaN	44.7214	1.95428		4.2066	0	70.6567	0	0	0	270.179	528.006
Cell 5	89.4427	0	89.4427	3.50328	113.137	NaN	56.5685	2.0104		80.9571	0	51.315	179.77	0	0	300.44	604.003
Cell 5	72.111	0.588221	100	2.20229	100	NaN	72.111	1.94799		192.95	113.497	71.5528	157.58	0	0	274.361	534.452
Cell 5	56.5685	0.520467	113.137	1.06072	89.4427	0	89.4427	2.60879		285.576	148.633	146.366	155.252	1.70484	0	222.55	580.586
Cell 5	44.7214	0.819899	128.062	0.962016	82.4621	0	107.703	2.85722		289.161	237.083	135.935	130.772	23.6622	0	161.26	460.756
Cell 5	116.619	NaN	63.2456	1.62407	116.619	NaN	63.2456	2.06524		0	0	161.749	262.692	0	0	250.488	517.317
Cell 5	100	0	72.111	1.54798	100	NaN	72.111	1.99155		38.0957	0	176.443	273.13	0	0	267.604	532.947
Cell 5	84.8528	0.985377	84.8528	1.6784	84.8528	NaN	84.8528	2.40294		135.092	133.116	174.94	293.619	0	0	179.067	430.287
Cell 5	72.111	0.799879	100	1.07049	72.111	5.30326	100	4.16502		211.805	169.419	238.17	254.959	14.5417	77.1185	122.572	510.513
Cell 5	63.2456	1.28994	116.619	1.32068	63.2456	1.28449	116.619	5.40235		234.14	302.028	183.832	242.783	96.5577	124.027	72.4889	391.61
Cell 5	128.062	NaN	44.7214	1.30673	107.703	NaN	82.4621	3.5136		0	0	285.917	373.617	0	0	177.623	624.096
Cell 5	113.137	11.0997	56.5685	2.09688	89.4427	NaN	89.4427	2.93471		7.11527	78.9771	245.391	514.556	0	0	173.542	509.296
Cell 5	100	1.46682	72.111	1.6557	72.111	NaN	100	6.13216		91.3365	133.975	274.722	454.858	0	0	74.0787	454.262
Cell 5	89.4427	1.41447	89.4427	1.41311	56.5685	6.97458	113.137	12.7992		188.305	266.352	277.436	392.048	12.6084	87.9381	32.0587	410.325
Cell 5	82.4621	2.22895	107.703	1.24588	44.7214	1.33952	128.062	15.8041		177.562	395.776	224.638	279.872	118.186	158.312	22.6136	357.388
Cell 5	141.421	NaN	28.2843	1.73459	101.98	0	101.98	3.25044		0	0	299.461	519.44	20.5391	0	139.078	452.063
Cell 5	128.062	Inf	44.7214	1.77689	82.4621	0	107.703	3.2744		0	102.598	313.51	557.073	17.7475	0	122.747	401.922
Cell 5	116.619	2.0885	63.2456	1.91833	63.2456	NaN	116.619	13.3962		58.1126	121.368	315.333	604.912	0	0	24.5235	328.521
Cell 5	107.703	1.95412	82.4621	1.90666	44.7214	3.10911	128.062	44.9596		127.774	249.686	262.479	500.457	36.896	114.714	4.84897	218.008
Cell 5	101.98	2.77698	101.98	2.02661	28.2843	1.84843	141.421	Inf		135.688	376.803	207.276	420.067	116.307	214.986	0	202.44
Cell 6	101.98	NaN	101.98	NaN	141.421	NaN	28.2843	0.561431		0	0	0	0	0	0	171.751	96.4262
Cell 6	82.4621	NaN	107.703	NaN	128.062	NaN	44.7214	0.632394		0	0	0	0	0	0	172.797	109.276
Cell 6	63.2456	Inf	116.619	NaN	116.619	NaN	63.2456	0		0	88.8672	0	0	0	0	187.236	0
Cell 6	44.7214	2.95121	128.062	NaN	107.703	NaN	82.4621	0		28.661	84.5846	0	0	0	0	123.714	0
Cell 6	28.2843	0.983884	141.421	NaN	101.98	NaN	101.98	0		79.8243	78.5378	0	0	0	0	79.0677	0
Cell 6	107.703	NaN	82.4621	NaN	128.062	NaN	44.7214	0.63935		0	0	0	0	0	0	261.611	167.261
Cell 6	89.4427	Inf	89.4427	NaN	113.137	NaN	56.5685	0.464138		0	47.5591	0	0	0	0	237.425	110.198
Cell 6	72.111	Inf	100	NaN	100	NaN	72.111	0.42278		0	57.9834	0	0	0	0	171.994	72.7158
Cell 6	56.5685	1.36231	113.137	0	89.4427	NaN	89.4427	1.02766		65.6906	89.4911	11.2373	0	0	0	99.6122	102.367
Cell 6	44.7214	0.834566	128.062	0	82.4621	NaN	107.703	0		165.499	138.12	3.75319	0	0	0	33.0783	0
Cell 6	116.619	NaN	63.2456	0	116.619	NaN	63.2456	0.496569		0	0	9.16216	0	0	0	241.486	119.915
Cell 6	100	Inf	72.111	0	100	NaN	72.111	0.508687		0	53.6855	7.71082	0	0	0	257.168	130.818
Cell 6	84.8528	7.51947	84.8528	0	84.8528	NaN	84.8528	0.820793		7.53169	56.6343	41.3264	0	0	0	192.941	158.365
Cell 6	72.111	0.549338	100	0	72.111	NaN	100	0.442927		140.49	77.1764	46.9319	0	0	0	135.896	60.1921
Cell 6	63.2456	0.651982	116.619	0	63.2456	NaN	116.619	5.27238		227.098	148.064	30.2108	0	0	0	10.7894	56.8856
Cell 6	128.062	NaN	44.7214	0	107.703	NaN	82.4621	1.20757		0	0	75.3829	0	0	0	123.194	148.766
Cell 6	113.137	NaN	56.5685	0	89.4427	NaN	89.4427	0		0	0	71.7079	0	0	0	139.012	0
Cell 6	100	0.884039	72.111	0	72.111	NaN	100	1.00789		56.808	50.2205	53.5388	0	0	0	120.419	121.368
Cell 6	89.4427	0.804439	89.4427	0	56.5685	NaN	113.137	0		118.049	94.9631	81.8353	0	0	0	103.485	0
Cell 6	82.4621	0.639242	107.703	0	44.7214	Inf	128.062	1.17044		147.861	94.5189	70.3837	0	0	45.2067	45.1745	52.8742
Cell 6	141.421	NaN	28.2843	0.461255	101.98	NaN	101.98	7.8907		0	0	129.882	59.9085	0	0	21.1807	167.13
Cell 6	128.062	0	44.7214	0	82.4621	NaN	107.703	3.74199		8.63902	0	155.902	0	0	0	26.0616	97.5223
Cell 6	116.619	1.24529	63.2456	0	63.2456	NaN	116.619	1.81198		39.1868	48.7989	130.017	0	0	0	66.6067	120.69
Cell 6	107.703	1.17176	82.4621	0	44.7214	Inf	128.062	0.826371		78.9544	92.5157	109.037	0	0	93.9077	60.4631	49.9649
Cell 6	101.98	1.50422	101.98	0	28.2843	12.7913	141.421	1.09075		92.549	139.214	104.869	0	9.03219	115.533	42.6252	46.4935
Cell 7	44.7214	0.786775	107.703	0	107.703	0.542696	44.7214	0		280.905	221.009	16.9993	0	84.227	45.7096	31.5015	0
Cell 7	28.2843	0.45408	101.98	NaN	89.4427	0.361332	56.5685	0		155.505	70.6118	0	0	154.379	55.7821	9.37014	0
Cell 7	20	1.27707	100	NaN	72.111	0.381989	72.111	NaN		48.2186	61.5786	0	0	240.26	91.7766	0	0
Cell 7	28.2843	1.90824	101.98	NaN	56.5685	0.19091	89.4427	NaN		20.9216	39.9234	0	0	242.13	46.225	0	0
Cell 7	44.7214	NaN	107.703	NaN	44.7214	0	107.703	NaN		0	0	0	0	211.97	0	0	0
Cell 7	56.5685	0.886383	89.4427	0	101.98	0.348582	28.2843	1.241		185.065	164.038	111.374	0	167.767	58.4807	32.5341	40.3749
Cell 7	44.7214	1.09159	82.4621	0	82.4621	0.467448	44.7214	0		75.3884	82.2935	89.1259	0	254.353	118.897	11.342	0
Cell 7	40	2.18664	80	0	63.2456	0.335446	63.2456	NaN		33.1119	72.4038	31.8084	0	350.953	117.726	0	0
Cell 7	44.7214	5.5307	82.4621	NaN	44.7214	0.305896	82.4621	NaN		7.68266	42.4905	0	0	287.984	88.0931	0	0
Cell 7	56.5685	NaN	89.4427	NaN	28.2843	0.311139	101.98	NaN		0	0	0	0	186.47	58.0181	0	0
Cell 7	72.111	1.64699	72.111	0	100	0.490911	20	0.696564		114.851	189.159	187.999	0	256.418	125.878	45.6035	31.7658
Cell 7	63.2456	2.08833	63.2456	0	80	0.53091	40	NaN		49.8606	104.126	160.258	0	338.934	179.944	0	0
Cell 7	60	Inf	60	0	60	0.322211	60	NaN		0	74.1938	70.8078	0	369.866	119.175	0	0
Cell 7	63.2456	NaN	63.2456	0	40	0.809715	80	NaN		0	0	8.87951	0	282.177	228.483	0	0
Cell 7	72.111	NaN	72.111	NaN	20	0.503372	100	NaN		0	0	0	0	190.605	95.9454	0	0
Cell 7	89.4427	2.12143	56.5685	0.19091	101.98	0.717613	28.2843	1.90824		54.6437	115.923	242.13	46.225	218.012	156.448	20.9216	39.9234
Cell 7	82.4621	3.50363	44.7214	0	82.4621	0.779894	44.7214	NaN		19.6492	68.8436	211.97	0	326.138	254.353	0	0
Cell 7	80	Inf	40	0	63.2456	0.787804	63.2456	NaN		0	57.6824	94.9587	0	367.344	289.395	0	0
Cell 7	82.4621	NaN	44.7214	0	44.7214	0.786775	82.4621	NaN		0	0	31.5015	0	280.905	221.009	0	0
Cell 7	89.4427	NaN	56.5685	0	28.2843	0.45408	101.98	NaN		0	0	9.37014	0	155.505	70.6118	0	0
Cell 7	107.703	3.85931	44.7214	0.305896	107.703	1.16053	44.7214	5.5307		24.7225	95.4116	287.984	88.0931	162.296	188.35	7.68266	42.4905
Cell 7	101.98	24.7031	28.2843	0.311139	89.4427	1.06264	56.5685	NaN		2.57625	63.6415	186.47	58.0181	231.782	246.302	0	0
Cell 7	100	Inf	20	0.440129	72.111	0.835625	72.111	NaN		0	51.6457	80.0224	35.2201	273.736	228.741	0	0
Cell 7	101.98	NaN	28.2843	1.241	56.5685	0.886383	89.4427	NaN		0	0	32.5341	40.3749	185.065	164.038	0	0
Cell 7	107.703	NaN	44.7214	0	44.7214	1.09159	107.703	NaN		0	0	11.342	0	75.3884	82.2935	0	0
Cell 8	101.98	NaN	101.98	0	141.421	NaN	28.2843	0.850746		0	0	4.85484	0	0	0	292.895	249.18
Cell 8	82.4621	NaN	107.703	0	128.062	NaN	44.7214	0.591154		0	0	19.3614	0	0	0	285.864	168.99
Cell 8	63.2456	2.13112	116.619	0	116.619	NaN	63.2456	0.880036		27.976	59.6204	18.197	0	0	0	156.323	137.57
Cell 8	44.7214	1.39452	128.062	NaN	107.703	NaN	82.4621	1.45053		110.185	153.656	0	0	0	0	65.5025	95.013
Cell 8	28.2843	1.20581	141.421	NaN	101.98	NaN	101.98	4.5979		179.829	216.839	0	0	0	0	14.4062	66.2384
Cell 8	107.703	NaN	82.4621	0	128.062	NaN	44.7214	0.79047		0	0	47.9717	0	0	0	332.864	263.119
Cell 8	89.4427	NaN	89.4427	0	113.137	NaN	56.5685	0.67658		0	0	63.6621	0	0	0	316.524	214.154
Cell 8	72.111	3.79443	100	0	100	NaN	72.111	0.778219		18.0269	68.4016	59.7693	0	0	0	201.317	156.669
Cell 8	56.5685	3.04418	113.137	0	89.4427	NaN	89.4427	3.1452		74.9441	228.144	4.80378	0	0	0	41.2497	129.738
Cell 8	44.7214	1.11657	128.062	NaN	82.4621	0	107.703	Inf		169.597	189.367	0	0	1.91437	0	0	82.1674
Cell 8	116.619	NaN	63.2456	0	116.619	NaN	63.2456	0.878034		0	0	121.697	0	0	0	295.733	259.664
Cell 8	100	NaN	72.111	0	100	NaN	72.111	0.816552		0	0	125.921	0	0	0	293.101	239.332
Cell 8	84.8528	Inf	84.8528	0	84.8528	NaN	84.8528	1.38791		0	83.921	120.869	0	0	0	214.793	298.113
Cell 8	72.111	16.8608	100	0	72.111	0	100	7.71852		9.54933	161.01	31.7967	0	28.4693	0	42.0802	324.797
Cell 8	63.2456	1.91579	116.619	NaN	63.2456	0	116.619	Inf		88.2336	169.037	0	0	79.7362	0	0	219.022
Cell 8	128.062	NaN	44.7214	0	107.703	NaN	82.4621	1.74907		0	0	179.751	0	0	0	138.017	241.4
Cell 8	113.137	NaN	56.5685	0	89.4427	NaN	89.4427	1.31668		0	0	253.06	0	0	0	238.486	314.008
Cell 8	100	NaN	72.111	0	72.111	0	100	2.43808		0	0	196.685	0	11.7132	0	182.09	443.95
Cell 8	89.4427	Inf	89.4427	0	56.5685	0	113.137	4.3452		0	124.054	86.6366	0	102.424	0	70.6243	306.877
Cell 8	82.4621	9.09757	107.703	0	44.7214	0	128.062	Inf		20.0801	182.681	10.2464	0	173.05	0	0	243.395
Cell 8	141.421	NaN	28.2843	0.414482	101.98	NaN	101.98	5.66711		0	0	247.657	102.649	0	0	25.6282	145.238
Cell 8	128.062	NaN	44.7214	0.376085	82.4621	NaN	107.703	1.86118		0	0	253.364	95.2864	0	0	119.126	221.716
Cell 8	116.619	NaN	63.2456	0.481181	63.2456	0	116.619	2.8467		0	0	194.039	93.3681	33.2825	0	112.784	321.061
Cell 8	107.703	NaN	82.4621	0	44.7214	0	128.062	5.21557		0	0	92.6052	0	106.488	0	53.6728	279.934
Cell 8	101.98	Inf	101.98	0	28.2843	0.313053	141.421	Inf		0	62.8521	14.9048	0	197.281	61.7594	0	246.502
Cell 9	44.7214	1.05721	107.703	0	107.703	0	44.7214	1.24783		395.394	418.016	112.029	0	49.1704	0	320.251	399.619
Cell 9	28.2843	1.73798	101.98	0	89.4427	1.25171	56.5685	1.14712		293.325	509.794	74.9716	0	113.773	142.411	249.047	285.686
Cell 9	20	0.918806	100	0	72.111	1.36661	72.111	2.46853		292.046	268.334	69.9652	0	200.398	273.867	91.7041	226.375
Cell 9	28.2843	1.66729	101.98	0	56.5685	1.31296	89.4427	3.89034		258.486	430.972	33.6872	0	291.33	382.503	30.831	119.943
Cell 9	44.7214	1.72934	107.703	0	44.7214	1.35884	107.703	NaN		160.732	277.96	24.8203	0	305.259	414.798	0	0
Cell 9	56.5685	0.74086	89.4427	0.456581	101.98	2.16125	28.2843	1.50697		297.949	220.739	242.619	110.775	49.4906	106.961	302.529	455.903
Cell 9	44.7214	1.19687	82.4621	0.355397	82.4621	1.16038	44.7214	1.37387		243.893	291.909	206.585	73.4197	181.569	210.689	241.429	331.691
Cell 9	40	1.50125	80	0.579945	63.2456	1.03621	63.2456	1.46702		245.138	368.013	173.039	100.353	290.093	300.598	122.967	180.396
Cell 9	44.7214	2.44914	82.4621	0	44.7214	1.12124	82.4621	11.4411		156.667	383.7	126.295	0	338.18	379.182	12.5883	144.023
Cell 9	56.5685	3.0478	89.4427	0	28.2843	1.59214	101.98	Inf		121.566	370.51	72.3331	0	303.867	483.798	0	131.799
Cell 9	72.111	1.81207	72.111	0.708293	100	1.65129	20	1.9819		180.571	327.206	249.324	176.595	53.0625	87.6215	258.18	511.685
Cell 9	63.2456	2.98763	63.2456	0.976583	80	1.06728	40	1.6031		117.819	351.999	300.212	293.182	160.028	170.794	208.135	333.661
Cell 9	60	3.04599	60	0.96296	60	0.954406	60	1.83185		125.865	383.383	289.954	279.214	341.284	325.724	91.4688	167.558
Cell 9	63.2456	4.23206	63.2456	0.736385	40	0.987125	80	Inf		95.8358	405.583	229.297	168.851	422.526	417.086	0	141.589
Cell 9	72.111	5.47765	72.111	0.346739	20	1.59313	100	Inf		60.0905	329.155	167.903	58.2184	330.012	525.751	0	105.257
Cell 9	89.4427	6.32389	56.5685	1.31296	101.98	1.42823	28.2843	1.66729		54.2607	343.139	291.33	382.503	87.4028	124.832	258.486	430.972
Cell 9	82.4621	7.58527	44.7214	1.35884	82.4621	0.585612	44.7214	1.72934		49.3609	374.416	305.259	414.798	206.131	120.713	160.732	277.96
Cell 9	80	11.8842	40	1.36035	63.2456	0.798396	63.2456	7.81259		39.9491	474.761	316.012	429.887	338.295	270.093	37.7046	294.571
Cell 9	82.4621	26.0852	44.7214	1.24783	44.7214	1.05721	82.4621	39.7643		11.7379	306.186	320.251	399.619	395.394	418.016	6.26372	249.073
Cell 9	89.4427	Inf	56.5685	1.14712	28.2843	1.73798	101.98	Inf		0	292.321	249.047	285.686	293.325	509.794	0	173.506
Cell 9	107.703	196.779	44.7214	1.12124	107.703	1.71865	44.7214	2.44914		1.41987	279.401	338.18	379.182	65.2978	112.224	156.667	383.7
Cell 9	101.98	Inf	28.2843	1.59214	89.4427	0.626605	56.5685	3.0478		0	343.368	303.867	483.798	188.079	117.851	121.566	370.51
Cell 9	100	Inf	20	1.66602	72.111	1.02745	72.111	8.96415		0	299.55	310.465	517.241	254.596	261.584	31.9977	286.832
Cell 9	101.98	Inf	28.2843	1.50697	56.5685	0.74086	89.4427	Inf		0	270.929	302.529	455.903	297.949	220.739	0	217.288
Cell 9	107.703	Inf	44.7214	1.37387	44.7214	1.19687	107.703	Inf		0	194.726	241.429	331.691	243.893	291.909	0	116.883
