# Supplementary material for: Spatially displaced excitation contributes to the encoding of interrupted motion by a retinal direction-selective circuit
Source: eLife. 2021 Jun 7;10:e68181. doi: 10.7554/eLife.68181 (PMC8211448; doi:10.7554/eLife.68181)
Supplement: Figure 3—source data 1. [file elife-68181-fig3-data1.xlsx]

## Sheet: 3B
Vector sum : direction of EPSC displacement determined by peripheral spot stimulus	Length of vector	Degrees away from Max region
	28.3308	32.1272
	21.9348	37.375
	30.5306	0.916841
	44.5845	72.8061
	41.255	-7.82342
	35.9968	-8.24931
	56.2159	-6.30369
	20.2147	36.8546
	23.9626	-5.2434
	31.3783	-21.9654
	21.6361	-6.0496
	24.2513	-10.3326
	37.3834	8.60494
	58.6406	-18.765
	37.5736	15.5218
	1.76833	-161.438

## Sheet: 3C
	Center location of EPSC heatmap	X coordinate	Y coordinate
		-15.0664	23.9925
		2.9105	21.7408
		-0.488526	30.5267
		-42.592	13.1795
		24.9293	-32.8711
		28.8423	21.5381
		6.1724	55.876
		-12.1245	16.175
		-15.3248	18.4217
		28.8765	12.2779
		16.8262	13.6015
		4.34977	23.858
		-30.0916	22.1814
		18.8639	55.5236
		36.2033	10.0549

## Sheet: 3E
On	Distance Max	Max ChT/dend len	Distance Opp	Opp ChT/dend len	Distance Max + 90	Max + 90 ChT/dend len	Distance Max -90	Max-90 ChT/den len		Max den len	Max ChT	Opp den len	Opp ChT	Max + 90 len	Max + 90 ChT	Max -90 len	Max-90 ChT
Cell 1	44.7214	0.361615	107.703	Inf	107.703	0.0531511	44.7214	0.133164		301.043	108.862	0	2.92845	73.5332	3.90837	373.292	49.709
Cell 1	28.2843	0.26101	101.98	0.096479	89.4427	0.0207062	56.5685	0.0838969		323.082	84.3277	42.2433	4.07559	182.024	3.76902	310.045	26.0118
Cell 1	20	0.187063	100	0.0214369	72.111	0.0475711	72.111	0.0786217		304.34	56.9307	68.3674	1.46559	240.147	11.424	188.592	14.8274
Cell 1	28.2843	0.188604	101.98	0.0403189	56.5685	0.120472	89.4427	0.0695448		259.44	48.9314	132.06	5.32452	286.453	34.5095	59.8982	4.16561
Cell 1	44.7214	0.195979	107.703	0.0637613	44.7214	0.209411	107.703	0.162329		227.29	44.5441	113.621	7.24465	327.81	68.6468	5.48742	0.890766
Cell 1	56.5685	0.319428	89.4427	1.39804	101.98	0.117365	28.2843	0.204383		275.194	87.9048	5.1334	7.1767	80.9127	9.49629	331.125	67.6763
Cell 1	44.7214	0.29577	82.4621	0.1771	82.4621	0.0728919	44.7214	0.097115		327.019	96.7224	76.9739	13.6321	205.481	14.9779	242.277	23.5288
Cell 1	40	0.264876	80	0.0862081	63.2456	0.172445	63.2456	0.089688		280.566	74.3153	169.972	14.653	306.738	52.8955	165.312	14.8265
Cell 1	44.7214	0.167237	82.4621	0.0750419	44.7214	0.215072	82.4621	0.098438		261.267	43.6936	270.345	20.2872	375.191	80.6931	59.743	5.88098
Cell 1	56.5685	0.273309	89.4427	0.048748	28.2843	0.283459	101.98	0.170635		188.844	51.6127	278.504	13.5765	375.456	106.427	11.7217	2.00014
Cell 1	72.111	0.340886	72.111	0.082682	100	0.317262	20	0.161335		278.362	94.8899	147.82	12.2221	66.965	21.2454	270.885	43.7033
Cell 1	63.2456	0.288639	63.2456	0.208145	80	0.22145	40	0.108928		319.743	92.2905	194.11	40.403	204.362	45.2559	201.482	21.9471
Cell 1	60	0.176705	60	0.161928	60	0.254033	60	0.0996283		335.134	59.2197	301.905	48.8868	246.325	62.5748	154.818	15.4243
Cell 1	63.2456	0.171846	63.2456	0.105136	40	0.357964	80	0.102578		285.408	49.0463	377.902	39.7309	295.267	105.695	66.7657	6.84872
Cell 1	72.111	0.18707	72.111	0.0638343	20	0.293453	100	0.278232		161.498	30.2114	353.77	22.5827	338.585	99.3587	13.3171	3.70525
Cell 1	89.4427	0.326775	56.5685	0.120472	101.98	0.221633	28.2843	0.188604		255.445	83.4732	286.453	34.5095	102.387	22.6923	259.44	48.9314
Cell 1	82.4621	0.403427	44.7214	0.209411	82.4621	0.293671	44.7214	0.195979		251.547	101.481	327.81	68.6468	143.999	42.2883	227.29	44.5441
Cell 1	80	0.222279	40	0.226616	63.2456	0.337069	63.2456	0.185399		276.153	61.383	383.855	86.9877	232.539	78.3817	145.392	26.9555
Cell 1	82.4621	0.227922	44.7214	0.133164	44.7214	0.361615	82.4621	0.190803		220.334	50.2189	373.292	49.709	301.043	108.862	68.0603	12.9861
Cell 1	89.4427	0.31709	56.5685	0.0838969	28.2843	0.26101	101.98	0.22363		121.916	38.6582	310.045	26.0118	323.082	84.3277	14.1201	3.15767
Cell 1	107.703	0.387562	44.7214	0.215072	107.703	0.154063	44.7214	0.167237		183.344	71.0572	375.191	80.6931	87.3589	13.4588	261.267	43.6936
Cell 1	101.98	0.368887	28.2843	0.283459	89.4427	0.170054	56.5685	0.273309		222.319	82.0105	375.456	106.427	159.797	27.1742	188.844	51.6127
Cell 1	100	0.320982	20	0.178812	72.111	0.2376	72.111	0.326142		177.453	56.9591	378.729	67.7213	225.826	53.6564	97.9561	31.9476
Cell 1	101.98	0.466446	28.2843	0.204383	56.5685	0.319428	89.4427	0.376095		97.4604	45.46	331.125	67.6763	275.194	87.9048	45.2871	17.0323
Cell 1	107.703	0.567658	44.7214	0.097115	44.7214	0.29577	107.703	1.20106		32.905	18.6788	242.277	23.5288	327.019	96.7224	5.82633	6.99777
Cell 2	44.7214	0.0887506	107.703	Inf	107.703	Inf	44.7214	0.0612161		208.007	18.4608	0	4.91546	0	5.80361	300.992	18.4256
Cell 2	28.2843	0.0704691	101.98	0.46222	89.4427	1.60633	56.5685	0.0538057		276.949	19.5164	14.1208	6.52692	5.6643	9.09873	270.459	14.5522
Cell 2	20	0.0592879	100	0.444916	72.111	0.205255	72.111	0.0287225		317.428	18.8196	19.0576	8.47905	55.1256	11.3148	188.459	5.41303
Cell 2	28.2843	0.0556096	101.98	0.134012	56.5685	0.152753	89.4427	0.0489059		182.209	10.1326	59.8136	8.01576	125.591	19.1843	106.505	5.20872
Cell 2	44.7214	0.194694	107.703	0.0767031	44.7214	0.0848213	107.703	0.129466		41.6304	8.10518	72.5891	5.56781	216.409	18.3561	41.051	5.31469
Cell 2	56.5685	0.0660465	89.4427	0.104189	101.98	Inf	28.2843	0.0443368		318.294	21.0222	70.949	7.39208	0	3.26038	302.288	13.4025
Cell 2	44.7214	0.0597789	82.4621	0.118105	82.4621	Inf	44.7214	0.0310739		376.256	22.4922	78.8665	9.31457	0	8.58356	219.782	6.8295
Cell 2	40	0.0568677	80	0.137712	63.2456	0.587945	63.2456	0.0348464		435.485	24.765	103.859	14.3025	28.1637	16.5587	140.181	4.88479
Cell 2	44.7214	0.0671193	82.4621	0.0916702	44.7214	0.454358	82.4621	0.0638629		275.911	18.519	132.722	12.1667	46.1399	20.964	61.8803	3.95186
Cell 2	56.5685	0.0866493	89.4427	0.0542208	28.2843	0.108986	101.98	0.0780879		115.381	9.99771	154.668	8.38622	205.426	22.3887	37.6393	2.93918
Cell 2	72.111	0.0535051	72.111	0.130725	100	Inf	20	0.0380941		333.837	17.862	114.991	15.0323	0	6.10725	224.524	8.55304
Cell 2	63.2456	0.051166	63.2456	0.121265	80	5.08107	40	0.0476305		469.795	24.0375	148.942	18.0614	1.58339	8.04531	89.0612	4.24202
Cell 2	60	0.0506331	60	0.0894305	60	0.219034	60	0.178401		481.619	24.3858	215.867	19.3051	65.0606	14.2505	16.5441	2.95149
Cell 2	63.2456	0.0637648	63.2456	0.0809456	40	0.225768	80	0.0270094		343.592	21.9091	223.005	18.0513	89.3625	20.1752	26.8859	0.726171
Cell 2	72.111	0.096917	72.111	0.0563991	20	0.0985907	100	0.246252		179.38	17.3849	282.97	15.9592	204.597	20.1713	13.0585	3.21569
Cell 2	89.4427	0.0662737	56.5685	0.152753	101.98	0.343483	28.2843	0.0556096		343.601	22.7717	125.591	19.1843	11.3829	3.90982	182.209	10.1326
Cell 2	82.4621	0.0697872	44.7214	0.0848213	82.4621	0.0924283	44.7214	0.194694		394.05	27.4997	216.409	18.3561	99.6641	9.21179	41.6304	8.10518
Cell 2	80	0.0655952	40	0.0685382	63.2456	0.0849145	63.2456	Inf		409.323	26.8496	279.037	19.1247	160.887	13.6616	0	4.73969
Cell 2	82.4621	0.0815948	44.7214	0.0612161	44.7214	0.0887506	82.4621	Inf		316.418	25.8181	300.992	18.4256	208.007	18.4608	0	3.06142
Cell 2	89.4427	0.0929818	56.5685	0.0538057	28.2843	0.0704691	101.98	Inf		176.32	16.3945	270.459	14.5522	276.949	19.5164	0	0.183545
Cell 2	107.703	0.084172	44.7214	0.454358	107.703	0.195384	44.7214	0.0671193		242.563	20.417	46.1399	20.964	34.1663	6.67554	275.911	18.519
Cell 2	101.98	0.0725391	28.2843	0.108986	89.4427	0.08183	56.5685	0.0866493		280.06	20.3153	205.426	22.3887	150.09	12.2819	115.381	9.99771
Cell 2	100	0.0871382	20	0.0600318	72.111	0.058596	72.111	4.66422		237.957	20.7352	288.442	17.3157	244.676	14.3371	1.24022	5.78465
Cell 2	101.98	0.110345	28.2843	0.0443368	56.5685	0.0660465	89.4427	Inf		187.734	20.7155	302.288	13.4025	318.294	21.0222	0	2.34675
Cell 2	107.703	0.152938	44.7214	0.0310739	44.7214	0.0597789	107.703	Inf		109.763	16.787	219.782	6.8295	376.256	22.4922	0	1.6228
Cell 3	44.7214	0.112049	107.703	Inf	107.703	0.0555475	44.7214	0.0727622		314.848	35.2784	0	1.2071	15.8002	0.87766	198.484	14.4421
Cell 3	28.2843	0.104624	101.98	Inf	89.4427	0.0442639	56.5685	0.0567137		354.672	37.1071	0	0.546014	63.8203	2.82494	189.059	10.7222
Cell 3	20	0.0684129	100	Inf	72.111	0.0481638	72.111	0.092722		363.085	24.8397	0	1.89727	137.133	6.60483	95.7617	8.87921
Cell 3	28.2843	0.0708186	101.98	0.0803631	56.5685	0.0429836	89.4427	0.104493		326.104	23.0943	9.84165	0.790905	268.137	11.5255	25.7415	2.6898
Cell 3	44.7214	0.0558372	107.703	0.146133	44.7214	0.0589098	107.703	Inf		322.193	17.9903	5.61932	0.82117	246.225	14.5051	0	1.13517
Cell 3	56.5685	0.0890827	89.4427	0.0144955	101.98	0.0259057	28.2843	0.0726186		331.014	29.4877	36.1173	0.523539	42.233	1.09408	236.566	17.1791
Cell 3	44.7214	0.0998897	82.4621	0.0655453	82.4621	0.0377227	44.7214	0.0664016		351.366	35.0979	46.1383	3.02415	127.384	4.80525	255.435	16.9612
Cell 3	40	0.080693	80	0.0206609	63.2456	0.0748124	63.2456	0.0850402		354.738	28.6249	23.8612	0.492995	215.144	16.0955	175.305	14.9079
Cell 3	44.7214	0.0507398	82.4621	0.0823793	44.7214	0.0613746	82.4621	0.0621458		342.219	17.3642	35.9484	2.9614	287.964	17.6737	100.259	6.23069
Cell 3	56.5685	0.0424073	89.4427	0.0831871	28.2843	0.116617	101.98	0.266452		385.037	16.3284	25.7828	2.1448	285.832	33.3329	16.6853	4.44582
Cell 3	72.111	0.127383	72.111	0.0274	100	0.0351064	20	0.0595385		256.314	32.6502	128.073	3.50922	113.25	3.97582	302.667	18.0203
Cell 3	63.2456	0.07467	63.2456	0.0575429	80	0.0646377	40	0.0688156		378.59	28.2693	111.081	6.3919	156.314	10.1038	264.149	18.1776
Cell 3	60	0.0690307	60	0.0420142	60	0.0826292	60	0.0630244		375.965	25.9532	138.513	5.8195	257.983	21.3169	226.753	14.291
Cell 3	63.2456	0.0521203	63.2456	0.06226	40	0.118101	80	0.0781037		377.596	19.6804	100.655	6.26678	273.192	32.2641	149.933	11.7103
Cell 3	72.111	0.0410871	72.111	0.0364724	20	0.0814818	100	0.0903793		387.825	15.9346	88.4131	3.22464	358.557	29.2159	60.8496	5.49954
Cell 3	89.4427	0.102253	56.5685	0.0429836	101.98	0.0429625	28.2843	0.0708186		196.925	20.1362	268.137	11.5255	121.834	5.23431	326.104	23.0943
Cell 3	82.4621	0.0709294	44.7214	0.0589098	82.4621	0.0388675	44.7214	0.0558372		332.842	23.6083	246.225	14.5051	203.454	7.90774	322.193	17.9903
Cell 3	80	0.0462135	40	0.0580173	63.2456	0.0989771	63.2456	0.0435639		381.176	17.6155	220.108	12.7701	270.874	26.8103	327.531	14.2685
Cell 3	82.4621	0.0339517	44.7214	0.0727622	44.7214	0.112049	82.4621	0.0679123		402.069	13.6509	198.484	14.4421	314.848	35.2784	218.425	14.8337
Cell 3	89.4427	0.0667357	56.5685	0.0567137	28.2843	0.104624	101.98	0.0986375		355.03	23.6931	189.059	10.7222	354.672	37.1071	94.4621	9.3175
Cell 3	107.703	0.0755278	44.7214	0.0613746	107.703	0.0599755	44.7214	0.0507398		132.023	9.9714	287.964	17.6737	124.999	7.49685	342.219	17.3642
Cell 3	101.98	0.0331957	28.2843	0.116617	89.4427	0.0634691	56.5685	0.0424073		275.857	9.15729	285.832	33.3329	229.674	14.5772	385.037	16.3284
Cell 3	100	0.0268163	20	0.0798427	72.111	0.0836132	72.111	0.0482793		351.276	9.41993	301.422	24.0664	271.727	22.7199	363.611	17.5549
Cell 3	101.98	0.0470922	28.2843	0.0726186	56.5685	0.0890827	89.4427	0.074179		298.065	14.0365	236.566	17.1791	331.014	29.4877	219.648	16.2933
Cell 3	107.703	0.0802142	44.7214	0.0664016	44.7214	0.0998897	107.703	0.0939152		256.292	20.5582	255.435	16.9612	351.366	35.0979	78.7096	7.39203
Cell 4	44.7214	0.0848683	107.703	0.0470146	107.703	0.208308	44.7214	0.0170645		389.102	33.0224	129.121	6.07058	40.4164	8.41907	430.689	7.34948
Cell 4	28.2843	0.168535	101.98	0.0435389	89.4427	0.117424	56.5685	0.00780224		281.027	47.3628	189.666	8.25785	106.302	12.4824	408.167	3.18462
Cell 4	20	0.0785385	100	0.0275847	72.111	0.0803952	72.111	0.00569586		294.968	23.1663	211.608	5.83714	256.852	20.6496	339.71	1.93494
Cell 4	28.2843	0.0485422	101.98	0.0242859	56.5685	0.135594	89.4427	0.00508405		289.709	14.0631	223.049	5.41693	289.502	39.2547	127.656	0.64901
Cell 4	44.7214	0.0569869	107.703	0.0335693	44.7214	0.0571771	107.703	0.0252332		320.118	18.2425	195.393	6.5592	338.596	19.3599	14.9739	0.377839
Cell 4	56.5685	0.0759653	89.4427	0.0692543	101.98	0.104887	28.2843	0.0389817		360.153	27.3591	211.244	14.6295	117.091	12.2814	330.536	12.8849
Cell 4	44.7214	0.105918	82.4621	0.0591964	82.4621	0.132856	44.7214	0.0113195		255.742	27.0878	275.837	16.3285	170.905	22.7057	406.219	4.59818
Cell 4	40	0.111377	80	0.0160853	63.2456	0.0887084	63.2456	0.00020566		180.857	20.1433	319.979	5.14696	274.59	24.3584	351.554	0.0723007
Cell 4	44.7214	0.0891052	82.4621	0.0297239	44.7214	0.106498	82.4621	0.0084541		185.004	16.4848	297.136	8.83206	292.019	31.0995	168.463	1.42421
Cell 4	56.5685	0.0398381	89.4427	0.0234737	28.2843	0.124166	101.98	0.0349212		254.8	10.1508	287.661	6.75248	284.539	35.3301	46.6732	1.62989
Cell 4	72.111	0.101913	72.111	0.0446843	100	0.109262	20	0.0498098		242.804	24.7448	234.989	10.5003	126.919	13.8674	328.339	16.3545
Cell 4	63.2456	0.12209	63.2456	0.0438123	80	0.0692106	40	0.0111124		184.901	22.5746	318.342	13.9473	285.207	19.7393	348.977	3.87799
Cell 4	60	0.148869	60	0.0181995	60	0.0814752	60	0.0107331		104.693	15.5855	343	6.24242	329.798	26.8704	300.406	3.22427
Cell 4	63.2456	0.164421	63.2456	0.0166705	40	0.117791	80	0.0142658		59.542	9.78996	356.578	5.94433	301.414	35.5038	194.753	2.77832
Cell 4	72.111	0.066493	72.111	0.00584356	20	0.111566	100	0.0217134		91.1972	6.06398	383.766	2.24256	287.721	32.0998	58.6919	1.2744
Cell 4	89.4427	0.176947	56.5685	0.135594	101.98	0.0639634	28.2843	0.0485422		119.782	21.1951	289.502	39.2547	286.645	18.3348	289.709	14.0631
Cell 4	82.4621	0.14987	44.7214	0.0571771	82.4621	0.108643	44.7214	0.0569869		96.3086	14.4338	338.596	19.3599	332.602	36.135	320.118	18.2425
Cell 4	80	0.448018	40	0.0420653	63.2456	0.0998089	63.2456	0.00658137		31.9605	14.3189	370.213	15.5731	430.582	42.9759	316.351	2.08202
Cell 4	82.4621	Inf	44.7214	0.0170645	44.7214	0.0848683	82.4621	-0.00127419		0	5.58723	430.689	7.34948	389.102	33.0224	202.592	-0.258142
Cell 4	89.4427	Inf	56.5685	0.00780224	28.2843	0.168535	101.98	-0.00973391		0	0.712428	408.167	3.18462	281.027	47.3628	48.5389	-0.472473
Cell 4	107.703	0.340119	44.7214	0.106498	107.703	0.0665709	44.7214	0.0891052		37.3738	12.7115	292.019	31.0995	357.949	23.829	185.004	16.4848
Cell 4	101.98	0.352819	28.2843	0.124166	89.4427	0.0979038	56.5685	0.0398381		32.4884	11.4625	284.539	35.3301	363.184	35.5571	254.8	10.1508
Cell 4	100	0.715106	20	0.101048	72.111	0.0884378	72.111	0.0118664		10.1272	7.242	324.729	32.8131	380.933	33.6888	197.171	2.33972
Cell 4	101.98	Inf	28.2843	0.0389817	56.5685	0.0759653	89.4427	0.0173108		0	4.68093	330.536	12.8849	360.153	27.3591	121.503	2.1033
Cell 4	107.703	Inf	44.7214	0.0113195	44.7214	0.105918	107.703	0.0459131		0	0.154056	406.219	4.59818	255.742	27.0878	23.011	1.05651
Cell 5	44.7214	0.0710432	107.703	0.0712651	44.7214	0.0226729	107.703	Inf		345.71	24.5603	27.237	1.94105	285.78	6.47945	0	1.22756
Cell 5	56.5685	0.0613472	89.4427	0.0224544	28.2843	0.0299885	101.98	0.104743		381.701	23.4163	114.111	2.56229	306.072	9.17863	19.2361	2.01485
Cell 5	72.111	0.0657987	72.111	0.0284736	20	0.0302127	100	0.0686152		370.924	24.4063	175.72	5.00337	297.87	8.99945	28.4786	1.95406
Cell 5	89.4427	0.110027	56.5685	0.0382651	28.2843	0.0800263	101.98	0.142406		349.756	38.4827	182.588	6.98674	300.754	24.0683	19.5567	2.78499
Cell 5	107.703	0.190945	44.7214	0.189643	44.7214	0.187783	107.703	0.303747		241.104	46.0376	238.169	45.1671	210.241	39.4797	10.3887	3.15554
Cell 5	28.2843	0.100557	101.98	0.0337146	56.5685	0.0206089	89.4427	0.13275		307.869	30.9583	60.6249	2.04395	188.046	3.87544	5.7302	0.760683
Cell 5	44.7214	0.0371921	82.4621	0.0219228	44.7214	0.0269522	82.4621	0.0431589		381.411	14.1854	112.925	2.47564	250.471	6.75075	70.1299	3.02673
Cell 5	63.2456	0.025171	63.2456	0.0220308	40	0.0287798	80	0.0359234		374.685	9.43121	206.404	4.54724	277.992	8.00055	93.7041	3.36617
Cell 5	82.4621	0.0733274	44.7214	0.148151	44.7214	0.0958695	82.4621	0.0635521		360.449	26.4308	245.675	36.3971	309.358	29.658	122.043	7.7561
Cell 5	101.98	0.131261	28.2843	0.175009	56.5685	0.183288	89.4427	0.0822245		265.404	34.8373	249.59	43.6805	230.56	42.259	96.3147	7.91943
Cell 5	20	0.068907	100	0.0355295	72.111	0.0637836	72.111	0.0433558		279.006	19.2254	50.3812	1.79002	63.5867	4.05579	102.109	4.42703
Cell 5	40	0.0665681	80	0.0134519	63.2456	0.0637049	63.2456	0.0476827		277.458	18.4699	143.978	1.93678	83.769	5.3365	125.225	5.97105
Cell 5	60	0.0445275	60	0.0311182	60	0.0419118	60	0.113137		302.13	13.4531	230.555	7.17448	177.469	7.43805	206.774	23.3938
Cell 5	80	0.111249	40	0.0267793	63.2456	0.0858988	63.2456	0.0786164		302.689	33.6738	271.473	7.26984	241.395	20.7355	262.567	20.6421
Cell 5	100	0.138738	20	0.139576	72.111	0.114413	72.111	0.0829396		278.26	38.6052	277.019	38.6651	232.093	26.5544	263.901	21.8878
Cell 5	28.2843	0.0800263	101.98	0.0550514	89.4427	0.262336	56.5685	0.0382651		300.754	24.0683	32.0957	1.76691	10.2637	2.69254	182.588	6.98674
Cell 5	44.7214	0.187783	82.4621	0.0305806	82.4621	Inf	44.7214	0.189643		210.241	39.4797	101.001	3.08867	0	2.51778	238.169	45.1671
Cell 5	63.2456	0.107935	63.2456	0.0221712	80	0.0320731	40	0.159991		264.68	28.5682	214.174	4.7485	69.9084	2.24218	270.241	43.2362
Cell 5	82.4621	0.116642	44.7214	0.0226729	82.4621	0.0378841	44.7214	0.0710432		271.841	31.7082	285.78	6.47945	115.613	4.37989	345.71	24.5603
Cell 5	101.98	0.106372	28.2843	0.0299885	89.4427	0.0497188	56.5685	0.0613472		279.477	29.7287	306.072	9.17863	130.292	6.47797	381.701	23.4163
Cell 5	44.7214	0.0958695	107.703	1.08203	107.703	Inf	44.7214	0.148151		309.358	29.658	1.75928	1.90359	0	1.25041	245.675	36.3971
Cell 5	56.5685	0.183288	89.4427	0.0778249	101.98	Inf	28.2843	0.175009		230.56	42.259	37.0895	2.88649	0	1.41074	249.59	43.6805
Cell 5	72.111	0.238051	72.111	0.0178062	100	0.344254	20	0.199947		182.261	43.3874	159.568	2.8413	5.42964	1.86918	321.551	64.293
Cell 5	89.4427	0.158222	56.5685	0.0206089	101.98	0.116184	28.2843	0.100557		159.185	25.1866	188.046	3.87544	13.8171	1.60532	307.869	30.9583
Cell 5	107.703	0.0600491	44.7214	0.0269522	107.703	0.143705	44.7214	0.0371921		184.654	11.0883	250.471	6.75075	20.7817	2.98642	381.411	14.1854
Cell 6	28.2843	0.114803	141.421	Inf	101.98	0.105056	101.98	0.415694		249.427	28.6351	0	2.96041	52.0519	5.46834	20.8163	8.6532
Cell 6	44.7214	0.155135	128.062	Inf	82.4621	0.106257	107.703	0.31811		211.904	32.8739	0	1.45855	120.131	12.7647	34.9511	11.1183
Cell 6	63.2456	0.156731	116.619	Inf	63.2456	0.126939	116.619	0.13713		179.451	28.1256	0	1.18285	167.145	21.2172	57.0777	7.82708
Cell 6	82.4621	0.148096	107.703	Inf	44.7214	0.220124	128.062	0.207395		228.257	33.8039	0	2.87675	133.842	29.4619	84.3319	17.49
Cell 6	101.98	0.200382	101.98	0.327941	28.2843	0.169194	141.421	0.200619		248.635	49.8219	5.79997	1.90205	189.937	32.1362	58.9418	11.8249
Cell 6	44.7214	0.112223	128.062	Inf	107.703	0.242781	82.4621	0.118705		211.377	23.7214	0	-1.47033	29.2256	7.09543	85.8198	10.1873
Cell 6	56.5685	0.127263	113.137	Inf	89.4427	0.211154	89.4427	0.196694		186.654	23.7541	0	1.20161	97.4474	20.5764	118.675	23.3427
Cell 6	72.111	0.107255	100	Inf	72.111	0.210127	100	0.190401		217.091	23.2842	0	-0.267771	157.681	33.133	140.503	26.7519
Cell 6	89.4427	0.141009	89.4427	Inf	56.5685	0.202362	113.137	0.129784		213.829	30.1519	0	0.752777	154.32	31.2286	196.225	25.4668
Cell 6	107.703	0.216277	82.4621	Inf	44.7214	0.239139	128.062	0.178956		219.561	47.4859	51.4851	3.23698	141.422	33.8196	127.061	22.7383
Cell 6	63.2456	0.170974	116.619	Inf	116.619	0.721557	63.2456	0.0986378		177.95	30.4247	0	-1.53953	17.9924	12.9825	229.377	22.6252
Cell 6	72.111	0.1238	100	-0.0597448	100	0.257875	72.111	0.105344		196.03	24.2685	11.138	-0.665438	57.9408	14.9415	209.855	22.107
Cell 6	84.8528	0.133093	84.8528	0.103666	84.8528	0.201097	84.8528	0.180413		183.02	24.3588	42.2496	4.37986	128.402	25.8213	196.626	35.4739
Cell 6	100	0.266265	72.111	0.0504707	72.111	0.240296	100	0.147256		159.592	42.4937	88.4188	4.46256	118.254	28.416	209.627	30.8688
Cell 6	116.619	0.384953	63.2456	0.0768223	63.2456	0.305977	116.619	0.203864		132.19	50.8869	123.472	9.48542	125.862	38.5108	147.365	30.0425
Cell 6	82.4621	0.171149	107.703	-0.0207354	128.062	2.47744	44.7214	0.143442		179.038	30.6421	5.93841	-0.123135	2.49954	6.19245	232.613	33.3665
Cell 6	89.4427	0.182545	89.4427	0.0430504	113.137	0.588478	56.5685	0.165959		200.826	36.6597	61.5521	2.64984	34.7583	20.4545	234.318	38.887
Cell 6	100	0.286662	72.111	0.0292173	100	0.352726	72.111	0.1306		160.709	46.0692	106.459	3.11045	64.47	22.7402	274.049	35.7908
Cell 6	113.137	0.310379	56.5685	0.0987072	89.4427	0.301525	89.4427	0.188177		149.891	46.5229	138.777	13.6983	110.277	33.2512	208.106	39.1607
Cell 6	128.062	0.864772	44.7214	0.119833	82.4621	0.283078	107.703	0.20966		59.8098	51.7218	193.707	23.2124	117.203	33.1777	193.971	40.6678
Cell 6	101.98	0.174824	101.98	-0.0720712	141.421	Inf	28.2843	0.125959		205.581	35.9404	22.8601	-1.64755	0	5.30033	265.727	33.4706
Cell 6	107.703	0.252012	82.4621	0.0486482	128.062	Inf	44.7214	0.124896		200.333	50.4863	81.0488	3.94288	0	14.9184	213.147	26.6211
Cell 6	116.619	0.308942	63.2456	0.091523	116.619	0.397597	63.2456	0.180608		136.256	42.0951	121.537	11.1234	41.4915	16.4969	193.169	34.8879
Cell 6	128.062	0.648083	44.7214	0.0773893	107.703	0.369218	82.4621	0.15557		79.8343	51.7393	205.721	15.9206	80.5388	29.7364	202.918	31.568
Cell 6	141.421	1.52826	28.2843	0.123009	101.98	0.188098	101.98	0.187549		31.9014	48.7537	220.949	27.1788	143.635	27.0175	210.928	39.5594
Cell 7	101.98	0.0923986	101.98	0.102515	141.421	Inf	28.2843	0.0665771		155.356	14.3547	11.0478	1.13256	0	1.30869	100.118	6.66558
Cell 7	82.4621	0.0764135	107.703	0.0555304	128.062	0.202304	44.7214	0.0578487		224.395	17.1468	7.70764	0.428008	6.93649	1.40328	93.6959	5.42019
Cell 7	63.2456	0.101224	116.619	0.134931	116.619	0.0354635	63.2456	0.0405453		274.053	27.7408	3.61719	0.48807	14.1316	0.501156	66.2298	2.6853
Cell 7	44.7214	0.0745089	128.062	Inf	107.703	Inf	82.4621	0.0675666		235.521	17.5484	0	0.624081	0	0.694074	22.7312	1.53587
Cell 7	28.2843	0.0642889	141.421	Inf	101.98	0.122599	101.98	Inf		204.005	13.1152	0	0.961115	4.61509	0.565804	0	1.08833
Cell 7	107.703	0.0577647	82.4621	0.0297766	128.062	Inf	44.7214	0.209872		203.738	11.7689	52.3703	1.55941	0	1.08956	56.8659	11.9346
Cell 7	89.4427	0.115315	89.4427	0.0174537	113.137	0.0394454	56.5685	0.343622		224.216	25.8555	51.4039	0.897187	28.1968	1.11224	36.4747	12.5335
Cell 7	72.111	0.0765019	100	0.0215394	100	0.0239169	72.111	0.236673		260.195	19.9054	38.7882	0.835472	36.4441	0.871631	23.6039	5.58641
Cell 7	56.5685	0.0636368	113.137	0.136301	89.4427	0.0140202	89.4427	0.162285		267.768	17.0399	8.18903	1.11617	72.7285	1.01967	15.6894	2.54616
Cell 7	44.7214	0.0813233	128.062	Inf	82.4621	0.0177961	107.703	Inf		166.166	13.5132	0	0.235764	61.9272	1.10207	0	1.55576
Cell 7	116.619	0.165956	63.2456	0.0190002	116.619	0.0551111	63.2456	0.740428		95.3464	15.8233	141.514	2.68881	26.2636	1.44742	27.7124	20.519
Cell 7	100	0.115444	72.111	0.0301511	100	0.0308017	72.111	Inf		202.771	23.4088	126.185	3.80461	86.1952	2.65496	0	12.6883
Cell 7	84.8528	0.0890655	84.8528	0.0286684	84.8528	0.0223775	84.8528	Inf		237.815	21.1811	67.1254	1.92438	113.985	2.55069	0	7.53352
Cell 7	72.111	0.101329	100	0.0286109	72.111	0.013377	100	Inf		224.635	22.7621	42.358	1.2119	183.035	2.44845	0	2.86361
Cell 7	63.2456	0.0807666	116.619	Inf	63.2456	0.0212248	116.619	Inf		187.255	15.124	0	0.82906	179.186	3.80318	0	1.66037
Cell 7	128.062	0.141524	44.7214	0.0410359	107.703	0.0399586	82.4621	1.48498		75.7873	10.7257	176.76	7.2535	60.405	2.4137	10.3557	15.378
Cell 7	113.137	0.19172	56.5685	0.0379252	89.4427	0.0267513	89.4427	Inf		110.897	21.2612	117.809	4.46793	138.811	3.71337	0	9.16611
Cell 7	100	0.158988	72.111	0.053695	72.111	0.0254776	100	Inf		150.971	24.0026	63.0698	3.38653	202.744	5.16542	0	3.34856
Cell 7	89.4427	0.0990799	89.4427	0.0661992	56.5685	0.0184222	113.137	Inf		178.21	17.657	23.1953	1.53551	240.701	4.43423	0	2.42878
Cell 7	82.4621	0.114312	107.703	Inf	44.7214	0.0280638	128.062	Inf		135.265	15.4624	0	0.590318	273.925	7.68738	0	0.25408
Cell 7	141.421	1.017	28.2843	0.0814363	101.98	0.0668724	101.98	Inf		22.2519	22.6301	124.211	10.1153	80.4871	5.38236	0	11.2119
Cell 7	128.062	0.414601	44.7214	0.0950185	82.4621	0.0430921	107.703	Inf		57.8619	23.9896	78.8465	7.49187	188.79	8.13536	0	6.18254
Cell 7	116.619	0.266834	63.2456	0.304421	63.2456	0.0534641	116.619	Inf		82.9797	22.1418	10.7434	3.27053	243.474	13.0171	0	2.25504
Cell 7	107.703	0.356186	82.4621	Inf	44.7214	0.0445489	128.062	Inf		52.8543	18.8259	0	1.27238	265.131	11.8113	0	1.1595
Cell 7	101.98	0.381105	101.98	Inf	28.2843	0.0392277	141.421	Inf		53.8168	20.5099	0	0.534185	233.408	9.15608	0	0.0905797
Cell 8	101.98	0.145392	101.98	0.0467347	141.421	0.615784	28.2843	0.0661487		112.914	16.4169	256.479	11.9865	10.0004	6.1581	359.522	23.7819
Cell 8	82.4621	0.101762	107.703	0.0321388	128.062	0.147131	44.7214	0.0603175		223.439	22.7376	204.681	6.5782	57.0326	8.39128	266.098	16.0504
Cell 8	63.2456	0.0762536	116.619	0.0103524	116.619	0.082074	63.2456	0.07685		285.389	21.7619	105.341	1.09053	128.016	10.5068	154.772	11.8942
Cell 8	44.7214	0.0832344	128.062	0.0517536	107.703	0.0604574	82.4621	0.0878051		312.518	26.0122	32.8862	1.70198	213.263	12.8933	83.5973	7.34027
Cell 8	28.2843	0.0733043	141.421	Inf	101.98	0.0728361	101.98	0.0541888		308.509	22.615	0	-0.750139	229.98	16.7508	51.9716	2.81628
Cell 8	107.703	0.0968511	82.4621	0.0515287	128.062	Inf	44.7214	0.0595996		126.117	12.2146	303.253	15.6262	0	6.80681	289.046	17.227
Cell 8	89.4427	0.0844044	89.4427	0.0411814	113.137	0.254808	56.5685	0.0730887		237.111	20.0132	251.263	10.3473	46.7579	11.9143	158.609	11.5925
Cell 8	72.111	0.0717441	100	0.0257886	100	0.0740073	72.111	0.10406		293.199	21.0353	112.973	2.91341	174.296	12.8991	58.92	6.13119
Cell 8	56.5685	0.105357	113.137	0.0626414	89.4427	0.0678358	89.4427	0.246758		239.702	25.2541	32.7609	2.05219	257.436	17.4634	14.9503	3.68911
Cell 8	44.7214	0.0757002	128.062	Inf	82.4621	0.0383956	107.703	Inf		301.11	22.7941	0	0.587168	304.037	11.6737	0	1.14604
Cell 8	116.619	0.131583	63.2456	0.0552233	116.619	10.8745	63.2456	0.0832936		98.9356	13.0182	315.996	17.4503	0.660892	7.1869	212.895	17.7328
Cell 8	100	0.0936569	72.111	0.0432954	100	0.158227	72.111	0.0763108		198.251	18.5676	222.609	9.63794	55.4675	8.77648	133.484	10.1863
Cell 8	84.8528	0.0709904	84.8528	0.04309	84.8528	0.0692112	84.8528	0.163415		304.36	21.6066	120.365	5.18654	211.538	14.6408	32.6041	5.328
Cell 8	72.111	0.075263	100	0.119726	72.111	0.036488	100	Inf		278.959	20.9953	37.911	4.53892	338.151	12.3384	0	2.62188
Cell 8	63.2456	0.0928049	116.619	0.410968	63.2456	0.0436342	116.619	Inf		230.54	21.3952	5.39434	2.2169	359.876	15.7029	0	1.35224
Cell 8	128.062	0.140161	44.7214	0.0583315	107.703	0.965966	82.4621	0.104741		68.5719	9.61113	363.967	21.2308	9.56234	9.2369	122.731	12.855
Cell 8	113.137	0.0925631	56.5685	0.061562	89.4427	0.131803	89.4427	0.127186		171.822	15.9044	293.364	18.0601	101.99	13.4426	54.6938	6.95626
Cell 8	100	0.0981618	72.111	0.0559885	72.111	0.083535	100	Inf		226.156	22.1999	210.039	11.7598	229.114	19.139	0	3.88145
Cell 8	89.4427	0.146837	89.4427	0.0434714	56.5685	0.0544593	113.137	Inf		177.987	26.135	154.049	6.69673	337.845	18.3988	0	2.48711
Cell 8	82.4621	0.124579	107.703	0.0562458	44.7214	0.0761151	128.062	Inf		189.116	23.5599	113.048	6.35848	358.884	27.3165	0	0.695702
Cell 8	141.421	0.109039	28.2843	0.0615729	101.98	0.195769	101.98	0.371533		50.735	5.53207	430.509	26.5077	42.278	8.27672	21.9646	8.16058
Cell 8	128.062	0.198846	44.7214	0.0625751	82.4621	0.130308	107.703	6.2271		78.5978	15.6289	368.813	23.0785	129.325	16.8521	0.691182	4.30406
Cell 8	116.619	0.212452	63.2456	0.0512331	63.2456	0.0938929	116.619	Inf		122.327	25.9887	298.03	15.269	261.86	24.5868	0	1.26567
Cell 8	107.703	0.140491	82.4621	0.048317	44.7214	0.077485	128.062	Inf		136.417	19.1653	243.772	11.7783	301.309	23.3469	0	0.0493781
Cell 8	101.98	0.108377	101.98	0.0511155	28.2843	0.0890018	141.421	Inf		117.507	12.7351	184.046	9.4076	347.961	30.9692	0	1.86496
Cell 9	101.98	0.139929	101.98	0.0625452	141.421	Inf	28.2843	0.0856382		232.327	32.5094	38.5649	2.41205	0	2.06933	372.862	31.9312
Cell 9	82.4621	0.164303	107.703	0.0782489	128.062	Inf	44.7214	0.121816		295.945	48.6246	16.4962	1.29081	0	2.19684	358.579	43.6805
Cell 9	63.2456	0.120811	116.619	Inf	116.619	Inf	63.2456	0.0996268		321.94	38.8938	0	0.754414	0	2.81881	304.096	30.2961
Cell 9	44.7214	0.106434	128.062	Inf	107.703	Inf	82.4621	0.0928014		356.396	37.9327	0	0.749806	0	4.94174	255.549	23.7153
Cell 9	28.2843	0.100888	141.421	Inf	101.98	0.0978952	101.98	0.0992751		387.175	39.0615	0	0.870004	33.0606	3.23647	171.733	17.0488
Cell 9	107.703	0.114522	82.4621	0.0264713	128.062	Inf	44.7214	0.0738819		251.978	28.8569	152.736	4.04311	0	1.55459	432.907	31.984
Cell 9	89.4427	0.108704	89.4427	0.0208859	113.137	Inf	56.5685	0.0892566		326.91	35.5365	81.1691	1.69529	0	5.76728	309.065	27.5861
Cell 9	72.111	0.0729291	100	0.520184	100	5.81136	72.111	0.0902355		417.691	30.4618	8.84142	4.59916	1.97234	11.462	268.766	24.2522
Cell 9	56.5685	0.076524	113.137	0.0883286	89.4427	0.255857	89.4427	0.111632		431.64	33.0308	33.6076	2.96851	66.3672	16.9805	180.116	20.1067
Cell 9	44.7214	0.0886626	128.062	0.107408	82.4621	0.170251	107.703	0.0737158		460.284	40.81	23.3593	2.50898	105.174	17.906	122.489	9.02941
Cell 9	116.619	0.168179	63.2456	0.0532939	116.619	Inf	63.2456	0.0676463		171.705	28.8771	202.478	10.7908	0	2.66738	414.019	28.0068
Cell 9	100	0.118061	72.111	0.0588052	100	0.603484	72.111	0.0598912		259.041	30.5826	160.479	9.43699	23.6588	14.2777	325.985	19.5237
Cell 9	84.8528	0.10788	84.8528	0.10635	84.8528	0.346596	84.8528	0.0551694		381.112	41.1143	101.755	10.8217	65.2998	22.6326	239.902	13.2352
Cell 9	72.111	0.0760041	100	0.0706335	72.111	0.21075	100	0.0581609		437.131	33.2237	77.3549	5.46385	146.656	30.9078	156.396	9.09614
Cell 9	63.2456	0.092301	116.619	0.0137641	63.2456	0.130957	116.619	0.171588		456.155	42.1036	48.0869	0.661871	248.857	32.5897	40.8428	7.00813
Cell 9	128.062	0.37505	44.7214	0.104575	107.703	0.313653	82.4621	0.0920613		53.1238	19.9241	297.514	31.1126	20.0984	6.30392	328.595	30.2509
Cell 9	113.137	0.157068	56.5685	0.0456728	89.4427	0.210185	89.4427	0.0674305		162.905	25.5873	246.024	11.2366	113.738	23.9061	249.065	16.7946
Cell 9	100	0.115809	72.111	0.0769395	72.111	0.187172	100	0.0595454		252.258	29.2137	205.55	15.8149	154.05	28.8338	186.557	11.1086
Cell 9	89.4427	0.078121	89.4427	0.0673245	56.5685	0.131372	113.137	0.103154		353.061	27.5815	169.452	11.4083	278.694	36.6126	89.9046	9.27402
Cell 9	82.4621	0.120194	107.703	0.0286602	44.7214	0.138426	128.062	0.23798		289.05	34.742	118.626	3.39983	272.226	37.6831	36.6791	8.7289
Cell 9	141.421	0.765627	28.2843	0.0706193	101.98	0.275133	101.98	0.202822		18.5378	14.1931	366.902	25.9104	77.2801	21.2623	193.682	39.2829
Cell 9	128.062	0.175882	44.7214	0.0522352	82.4621	0.144274	107.703	0.119472		78.8478	13.8679	384.263	20.0721	167.902	24.2239	153.321	18.3176
Cell 9	116.619	0.1309	63.2456	0.0706461	63.2456	0.163027	116.619	0.111483		139.792	18.2988	318.86	22.5262	242.12	39.472	76.2488	8.50045
Cell 9	107.703	0.152056	82.4621	0.064579	44.7214	0.162997	128.062	0.209248		177.862	27.0449	200.646	12.9575	290.954	47.4246	27.1914	5.68975
Cell 9	101.98	0.204872	101.98	0.116235	28.2843	0.116141	141.421	0.219482		148.262	30.3748	105.969	12.3173	316.045	36.7058	10.902	2.39279
Cell 10	44.7214	0.156013	107.703	Inf	107.703	Inf	44.7214	0.0711806		226.765	35.3782	0	5.95955	0	3.51781	263.918	18.7859
Cell 10	28.2843	0.20323	101.98	Inf	89.4427	Inf	56.5685	0.0802698		293.6	59.6684	0	2.81055	0	4.34885	249.533	20.03
Cell 10	20	0.1861	100	Inf	72.111	Inf	72.111	0.0866285		366.765	68.2548	0	3.70861	0	6.87347	207.792	18.0007
Cell 10	28.2843	0.178081	101.98	Inf	56.5685	Inf	89.4427	0.142769		372.239	66.2886	0	4.18597	0	16.426	129.785	18.5294
Cell 10	44.7214	0.141616	107.703	Inf	44.7214	0.430159	107.703	0.164125		360.032	50.9863	0	2.61518	55.9048	24.0479	87.4864	14.3587
Cell 10	56.5685	0.179051	89.4427	Inf	101.98	Inf	28.2843	0.0890637		248.006	44.4059	0	5.71475	0	2.65501	339.728	30.2574
Cell 10	44.7214	0.292854	82.4621	Inf	82.4621	Inf	44.7214	0.0895016		307.881	90.164	0	7.13314	0	6.60166	318.677	28.5221
Cell 10	40	0.14809	80	0.371342	63.2456	2.40401	63.2456	0.094683		401.523	59.4614	24.9597	9.2686	14.9465	35.9316	294.379	27.8727
Cell 10	44.7214	0.186835	82.4621	0.140416	44.7214	0.635095	82.4621	0.145063		434.119	81.1086	50.5314	7.09541	45.281	28.7578	214.505	31.1168
Cell 10	56.5685	0.140093	89.4427	0.130238	28.2843	0.31523	101.98	0.111954		403.833	56.5743	35.2127	4.58604	149.891	47.2501	154.169	17.2598
Cell 10	72.111	0.168272	72.111	Inf	100	Inf	20	0.137436		256.471	43.1571	0	11.83	0	29.9418	324.436	44.5892
Cell 10	63.2456	0.170686	63.2456	0.798379	80	20.53	40	0.119245		285.071	48.6577	18.0531	14.4132	0.408826	8.3932	323.785	38.6096
Cell 10	60	0.196079	60	0.346197	60	0.260637	60	0.126678		403.375	79.0934	97.5148	33.7593	62.2217	16.2173	290.75	36.8316
Cell 10	63.2456	0.141045	63.2456	0.0901719	40	0.266263	80	0.112716		442.782	62.4522	150.931	13.6097	118.094	31.4441	268.298	30.2414
Cell 10	72.111	0.135009	72.111	0.233501	20	0.165425	100	0.104093		407.144	54.968	124.068	28.9699	210.743	34.8621	208.43	21.6961
Cell 10	89.4427	0.11296	56.5685	Inf	101.98	Inf	28.2843	0.178081		256.577	28.983	0	16.426	0	7.84718	372.239	66.2886
Cell 10	82.4621	0.176418	44.7214	0.430159	82.4621	0.519415	44.7214	0.141616		252.275	44.506	55.9048	24.0479	28.7181	14.9166	360.032	50.9863
Cell 10	80	0.177445	40	0.137631	63.2456	0.409027	63.2456	0.190691		333.034	59.095	177.827	24.4744	113.08	46.2528	294.403	56.1399
Cell 10	82.4621	0.14749	44.7214	0.0711806	44.7214	0.156013	82.4621	0.0979155		364.7	53.7897	263.918	18.7859	226.765	35.3782	301.756	29.5466
Cell 10	89.4427	0.12113	56.5685	0.0802698	28.2843	0.20323	101.98	0.12193		317.222	38.425	249.533	20.03	293.6	59.6684	210.949	25.7211
Cell 10	107.703	0.129605	44.7214	0.635095	107.703	0.704914	44.7214	0.186835		256.201	33.2049	45.281	28.7578	13.4191	9.4593	434.119	81.1086
Cell 10	101.98	0.157723	28.2843	0.31523	89.4427	0.234949	56.5685	0.140093		212.929	33.5837	149.891	47.2501	73.5577	17.2823	403.833	56.5743
Cell 10	100	0.151379	20	0.180534	72.111	0.185079	72.111	0.174518		281.59	42.6267	229.28	41.393	189.706	35.1105	358.377	62.5434
Cell 10	101.98	0.151648	28.2843	0.0890637	56.5685	0.179051	89.4427	0.146478		284.498	43.1437	339.728	30.2574	248.006	44.4059	330.139	48.3583
Cell 10	107.703	0.241676	44.7214	0.0895016	44.7214	0.292854	107.703	0.133455		178.737	43.1963	318.677	28.5221	307.881	90.164	242.769	32.3987
Cell 11	28.2843	0.0964956	141.421	Inf	101.98	0.142724	101.98	0.0226377		340.967	32.9018	0	1.76512	30.2988	4.32435	156.672	3.54669
Cell 11	44.7214	0.0716593	128.062	0.498884	82.4621	0.0468136	107.703	0.0383668		290.481	20.8156	3.30651	1.64957	129.419	6.05858	45.9726	1.76382
Cell 11	63.2456	0.124336	116.619	0.0919895	63.2456	0.0738872	116.619	0.179174		237.141	29.4852	49.1222	4.51873	191.98	14.1849	4.21074	0.754453
Cell 11	82.4621	0.386879	107.703	0.0971697	44.7214	0.082759	128.062	Inf		66.8911	25.8788	113.12	10.9918	252.808	20.9222	0	2.04019
Cell 11	101.98	0.635595	101.98	0.060887	28.2843	0.127471	141.421	Inf		31.0077	19.7084	198.71	12.0989	303.126	38.6399	0	1.83887
Cell 11	44.7214	0.0995039	128.062	Inf	107.703	3.01561	82.4621	0.0301809		285.51	28.4094	0	1.03618	1.10666	3.33726	281.861	8.50682
Cell 11	56.5685	0.123195	113.137	0.0744272	89.4427	0.129113	89.4427	0.02328		243.638	30.0151	41.1805	3.06495	55.8973	7.21705	157.039	3.65588
Cell 11	72.111	0.152134	100	0.110725	72.111	0.0712282	100	0.0506004		185.001	28.145	91.3381	10.1134	159.372	11.3518	87.5	4.42754
Cell 11	89.4427	0.279226	89.4427	0.0722741	56.5685	0.074802	113.137	0.106453		77.0253	21.5074	192.288	13.8974	221.879	16.597	26.3133	2.80112
Cell 11	107.703	Inf	82.4621	0.0578728	44.7214	0.129486	128.062	Inf		0	20.242	279.133	16.1542	278.664	36.0832	0	1.94154
Cell 11	63.2456	0.0716981	116.619	Inf	116.619	Inf	63.2456	0.0499403		288.978	20.7191	0	2.75092	0	1.3509	344.996	17.2292
Cell 11	72.111	0.168612	100	0.0761897	100	0.0998358	72.111	0.0619469		187.015	31.5331	53.4472	4.07213	50.8236	5.07401	260.496	16.137
Cell 11	84.8528	0.269162	84.8528	0.0748171	84.8528	0.0768655	84.8528	0.0699911		104.368	28.092	124.171	9.2901	131.204	10.0851	124.209	8.69351
Cell 11	100	0.829595	72.111	0.0900228	72.111	0.0609996	100	0.113644		28.91	23.9836	240.487	21.6494	215.217	13.1281	51.6656	5.87149
Cell 11	116.619	Inf	63.2456	0.0883497	63.2456	0.0994257	116.619	0.552824		0	14.8933	320.972	28.3578	305.298	30.3545	7.35888	4.06816
Cell 11	82.4621	0.170066	107.703	Inf	128.062	-0.328789	44.7214	0.096599		185.452	31.539	0	2.50253	4.03392	-1.32631	302.131	29.1856
Cell 11	89.4427	0.261761	89.4427	0.128863	113.137	0.0873163	56.5685	0.117088		104.325	27.3082	50.5552	6.51467	31.8481	2.78086	242.906	28.4413
Cell 11	100	0.747229	72.111	0.0883256	100	0.0310468	72.111	0.123512		41.6705	31.1374	125.859	11.1166	128.725	3.99651	145.445	17.9642
Cell 11	113.137	76.2719	56.5685	0.114803	89.4427	0.0383272	89.4427	0.216816		0.323921	24.7061	234.983	26.9767	205.534	7.87755	53.1843	11.5312
Cell 11	128.062	Inf	44.7214	0.0975191	82.4621	0.0417459	107.703	Inf		0	16.0685	354.065	34.5281	262.418	10.9549	0	6.44003
Cell 11	101.98	0.161787	101.98	0.102626	141.421	Inf	28.2843	0.13205		150.354	24.3254	27.3458	2.80638	0	1.56867	272.28	35.9545
Cell 11	107.703	0.339918	82.4621	0.057262	128.062	0.111485	44.7214	0.106385		70.3589	23.9163	110.094	6.3042	13.6595	1.52283	245.934	26.1637
Cell 11	116.619	3.00818	63.2456	0.0419612	116.619	0.0528654	63.2456	0.124707		9.42709	28.3584	150.929	6.33318	53.0856	2.8064	174.027	21.7025
Cell 11	128.062	Inf	44.7214	0.0881872	107.703	0.0949216	82.4621	0.318155		0	21.2845	259.186	22.8569	63.2779	6.00643	66.7927	21.2504
Cell 11	141.421	Inf	28.2843	0.108145	101.98	0.0655436	101.98	0.563837		0	13.795	339.785	36.7462	149.013	9.76683	12.8973	7.27197
Cell 12	44.7214	0.223796	107.703	Inf	107.703	0.232021	44.7214	0.154335		244.293	54.6718	0	1.01938	26.2651	6.09407	260.99	40.2799
Cell 12	28.2843	0.166564	101.98	Inf	89.4427	0.0589429	56.5685	0.126841		393.771	65.588	0	1.63171	105.488	6.21777	229.43	29.101
Cell 12	20	0.173008	100	Inf	72.111	0.122301	72.111	0.132778		405.37	70.132	0	0.446809	152.626	18.6664	172.047	22.8441
Cell 12	28.2843	0.164115	101.98	Inf	56.5685	0.175731	89.4427	0.086614		375.548	61.6332	0	2.03732	146.44	25.7341	53.5382	4.63716
Cell 12	44.7214	0.134039	107.703	0.184367	44.7214	0.26228	107.703	Inf		401.502	53.8167	6.85512	1.26386	146.982	38.5506	0	2.15367
Cell 12	56.5685	0.311985	89.4427	Inf	101.98	0.304315	28.2843	0.124045		173.04	53.9858	0	10.8059	29.3415	8.92906	402.151	49.8848
Cell 12	44.7214	0.227233	82.4621	0.349674	82.4621	0.148998	44.7214	0.0863462		297.488	67.5992	7.1779	2.50993	119.668	17.8302	402.628	34.7654
Cell 12	40	0.246343	80	0.212723	63.2456	0.111168	63.2456	0.0802731		341.27	84.0693	29.2161	6.21494	222.377	24.7213	312.001	25.0453
Cell 12	44.7214	0.212213	82.4621	0.339575	44.7214	0.177881	82.4621	0.0484504		317.007	67.2731	24.8741	8.44663	227.749	40.5122	175.721	8.51378
Cell 12	56.5685	0.186069	89.4427	0.170351	28.2843	0.196675	101.98	0.0475649		270.263	50.2875	48.8767	8.32619	304.636	59.9141	83.1337	3.95425
Cell 12	72.111	0.538741	72.111	2.36878	100	0.997648	20	0.125066		68.7666	37.0474	9.04879	21.4346	17.3311	17.2903	451.706	56.4933
Cell 12	63.2456	0.30442	63.2456	0.482716	80	0.391363	40	0.115282		157.956	48.0851	43.4746	20.9859	69.7431	27.2948	439.16	50.6272
Cell 12	60	0.28883	60	0.25333	60	0.206435	60	0.101346		205.203	59.2686	84.0826	21.3007	183.326	37.8449	390.727	39.5987
Cell 12	63.2456	0.149353	63.2456	0.179059	40	0.20543	80	0.105665		290.195	43.3416	106.013	18.9825	272.039	55.885	251.705	26.5964
Cell 12	72.111	0.170028	72.111	0.183161	20	0.154106	100	0.0801681		290.51	49.3947	96.5851	17.6906	352.207	54.277	122.298	9.80443
Cell 12	89.4427	Inf	56.5685	0.175731	101.98	Inf	28.2843	0.164115		0	31.2224	146.44	25.7341	0	16.825	375.548	61.6332
Cell 12	82.4621	3.3649	44.7214	0.26228	82.4621	2.18538	44.7214	0.134039		14.3711	48.3574	146.982	38.5506	11.9884	26.1993	401.502	53.8167
Cell 12	80	0.476124	40	0.217045	63.2456	0.475068	63.2456	0.139383		98.3378	46.821	203.418	44.1509	108.28	51.4403	315.736	44.0083
Cell 12	82.4621	0.274546	44.7214	0.154335	44.7214	0.223796	82.4621	0.146031		159.08	43.6748	260.99	40.2799	244.293	54.6718	236.419	34.5244
Cell 12	89.4427	0.193394	56.5685	0.126841	28.2843	0.166564	101.98	0.196213		208.13	40.251	229.43	29.101	393.771	65.588	122.243	23.9857
Cell 12	107.703	Inf	44.7214	0.177881	107.703	Inf	44.7214	0.212213		0	28.04	227.749	40.5122	0	9.30781	317.007	67.2731
Cell 12	101.98	Inf	28.2843	0.196675	89.4427	3.2115	56.5685	0.186069		0	28.1356	304.636	59.9141	6.84601	21.986	270.263	50.2875
Cell 12	100	2.72153	20	0.183212	72.111	0.420061	72.111	0.258579		11.5636	31.4706	344.001	63.025	77.8488	32.7012	207.671	53.6992
Cell 12	101.98	0.695427	28.2843	0.124045	56.5685	0.311985	89.4427	0.30426		49.8191	34.6455	402.151	49.8848	173.04	53.9858	133.559	40.6368
Cell 12	107.703	0.262762	44.7214	0.0863462	44.7214	0.227233	107.703	0.85263		105.397	27.6944	402.628	34.7654	297.488	67.5992	24.4337	20.8329
Cell 13	101.98	0.135359	101.98	0.0414929	141.421	0.190525	28.2843	0.138746		271.777	36.7875	104.199	4.32352	23.9267	4.55863	207.447	28.7825
Cell 13	82.4621	0.0975987	107.703	0.0305078	128.062	0.019642	44.7214	0.234021		384.304	37.5076	82.5048	2.51704	73.8845	1.45124	117.256	27.4404
Cell 13	63.2456	0.113409	116.619	0.0013932	116.619	0.0440704	63.2456	0.382159		406.253	46.0726	21.2887	0.0296594	80.0793	3.52912	49.9709	19.0968
Cell 13	44.7214	0.0767573	128.062	Inf	107.703	0.0481045	82.4621	3.32815		384.391	29.5048	0	-1.48015	105.476	5.07388	2.20047	7.32349
Cell 13	28.2843	0.0788136	141.421	Inf	101.98	0.0502166	101.98	Inf		346.101	27.2774	0	0.693856	116.444	5.84745	0	2.54452
Cell 13	107.703	0.145567	82.4621	0.0366834	128.062	0.0892489	44.7214	0.197953		263.858	38.409	223.882	8.21275	65.3561	5.83296	138.789	27.4737
Cell 13	89.4427	0.115171	89.4427	0.0284249	113.137	0.0416559	56.5685	0.50152		360.196	41.4842	175.967	5.00184	145.342	6.05435	47.0728	23.6079
Cell 13	72.111	0.0885424	100	0.022673	100	0.0671223	72.111	2.70968		409.404	36.2496	110.153	2.49751	176.383	11.8392	6.09268	16.5092
Cell 13	56.5685	0.0745639	113.137	0.12599	89.4427	0.0602232	89.4427	Inf		332.446	24.7884	16.6472	2.09738	219.664	13.2288	0	8.43629
Cell 13	44.7214	0.068959	128.062	Inf	82.4621	0.0477349	107.703	Inf		259.838	17.9182	0	1.19067	226.389	10.8066	0	4.42725
Cell 13	116.619	0.19991	63.2456	0.0602933	116.619	0.0656315	63.2456	0.642818		186.465	37.2762	273.994	16.52	162.909	10.6919	41.6197	26.7539
Cell 13	100	0.134143	72.111	0.0371441	100	0.0651417	72.111	Inf		272.563	36.5624	262.206	9.73939	217.116	14.1433	0	20.5276
Cell 13	84.8528	0.102214	84.8528	0.0433601	84.8528	0.0478995	84.8528	Inf		348.859	35.6583	156.973	6.80636	288.38	13.8132	0	10.9556
Cell 13	72.111	0.123305	100	0.0627761	72.111	0.0717743	100	Inf		288.495	35.5728	40.783	2.5602	298.92	21.4547	0	4.48994
Cell 13	63.2456	0.135986	116.619	0.932719	63.2456	0.0409564	116.619	Inf		223.909	30.4485	2.24152	2.09071	315.254	12.9117	0	2.3188
Cell 13	128.062	0.513164	44.7214	0.0964019	107.703	0.0783931	82.4621	3.81176		70.9176	36.3923	288.238	27.7867	252.491	19.7936	6.7255	25.636
Cell 13	113.137	0.268324	56.5685	0.0582433	89.4427	0.0643675	89.4427	Inf		168.907	45.3217	288.609	16.8096	277.36	17.8529	0	23.6825
Cell 13	100	0.184878	72.111	0.0514396	72.111	0.0608185	100	Inf		249.351	46.0995	229.335	11.7969	319.105	19.4075	0	9.54281
Cell 13	89.4427	0.210099	89.4427	0.0507453	56.5685	0.0602011	113.137	Inf		215.058	45.1835	66.2163	3.36017	288.378	17.3607	0	5.82218
Cell 13	82.4621	0.14628	107.703	0.574846	44.7214	0.0693352	128.062	NaN		166.907	24.4152	2.40911	1.38487	283.438	19.6523	0	0
Cell 13	141.421	2.45573	28.2843	0.109176	101.98	0.116484	101.98	Inf		9.64681	23.69	222.789	24.3232	271.808	31.6612	0	13.3714
Cell 13	128.062	0.261782	44.7214	0.0838097	82.4621	0.0973125	107.703	Inf		102.846	26.9233	225.082	18.864	341.524	33.2346	0	9.86232
Cell 13	116.619	0.363296	63.2456	0.114628	63.2456	0.118978	116.619	Inf		115.734	42.0458	149.343	17.1189	328.868	39.128	0	3.6945
Cell 13	107.703	0.308826	82.4621	0.138382	44.7214	0.0873037	128.062	Inf		122.567	37.8519	71.3659	9.87579	338.222	29.528	0	3.63763
Cell 13	101.98	0.399468	101.98	0.45978	28.2843	0.0633695	141.421	Inf		69.514	27.7686	6.66307	3.06355	344.188	21.811	0	0.98482
Cell 14	101.98	0.0337938	101.98	0.00696601	141.421	Inf	28.2843	0.0188341		141.255	4.77352	6.99279	0.0487118	0	-0.50744	267.965	5.04687
Cell 14	82.4621	0.0696785	107.703	Inf	128.062	Inf	44.7214	0.00464921		243.079	16.9374	0	-3.33672	0	-5.6677	205.096	0.953537
Cell 14	63.2456	0.264466	116.619	Inf	116.619	Inf	63.2456	0.0100241		275.89	72.9634	0	1.57621	0	-3.16295	131.259	1.31575
Cell 14	44.7214	0.306198	128.062	Inf	107.703	Inf	82.4621	-0.00892939		298.019	91.2527	0	0.669	0	0.249717	58.6052	-0.523309
Cell 14	28.2843	0.223733	141.421	-1.5353	101.98	0.0109439	101.98	0.257163		333.527	74.6212	6.18103	-9.48973	20.7258	0.226822	2.76267	0.710455
Cell 14	107.703	0.0361434	82.4621	0.0145412	128.062	Inf	44.7214	0.141283		192.215	6.94731	74.9829	1.09034	0	0.741962	176.244	24.9003
Cell 14	89.4427	0.134592	89.4427	-0.0338013	113.137	Inf	56.5685	0.0522906		271.408	36.5293	65.006	-2.19729	0	-3.5368	122.925	6.42783
Cell 14	72.111	0.284019	100	0.0040393	100	Inf	72.111	-0.0342392		330.94	93.9932	79.0771	0.319416	0	-2.52071	60.1939	-2.06099
Cell 14	56.5685	0.313519	113.137	-0.0526958	89.4427	-0.050019	89.4427	0.147888		329.924	103.437	62.5532	-3.2963	36.7429	-1.83784	32.5192	4.80918
Cell 14	44.7214	0.34388	128.062	0.0475673	82.4621	-0.00719956	107.703	0.255324		322.917	111.045	29.5612	1.40615	76.8673	-0.553411	1.91523	0.489006
Cell 14	116.619	0.043937	63.2456	-0.00133324	116.619	Inf	63.2456	0.269158		155.405	6.82802	202.637	-0.270163	0	-0.467268	152.94	41.1649
Cell 14	100	0.0973718	72.111	0.00132478	100	Inf	72.111	0.469987		287.74	28.0178	239.227	0.316924	0	-1.64834	48.9765	23.0183
Cell 14	84.8528	0.275765	84.8528	0.00901953	84.8528	0.247751	84.8528	Inf		352.793	97.288	207.501	1.87156	6.28232	1.55645	0	0.320602
Cell 14	72.111	0.243353	100	-0.00592509	72.111	-0.0352164	100	Inf		367.429	89.415	128.167	-0.759403	84.8161	-2.98692	0	-0.804418
Cell 14	63.2456	0.299289	116.619	-0.0307301	63.2456	-0.0419425	116.619	Inf		379.342	113.533	52.5056	-1.6135	157.402	-6.60183	0	-1.12108
Cell 14	128.062	0.0159704	44.7214	0.00329078	107.703	Inf	82.4621	0.320566		165.519	2.6434	345.18	1.13591	0	2.44943	140.412	45.0114
Cell 14	113.137	0.0804341	56.5685	-0.00724937	89.4427	-0.179645	89.4427	0.814649		294.014	23.6488	358.348	-2.5978	14.6565	-2.63297	32.6877	26.629
Cell 14	100	0.108117	72.111	0.000648129	72.111	-0.0139838	100	Inf		372.04	40.2237	283.571	0.183791	66.0199	-0.923211	0	6.8206
Cell 14	89.4427	0.169424	89.4427	-0.00949761	56.5685	0.00622503	113.137	Inf		420.318	71.212	165.143	-1.56847	160.921	1.00174	0	1.22472
Cell 14	82.4621	0.176224	107.703	-0.12431	44.7214	0.00650989	128.062	Inf		403.197	71.0532	49.9367	-6.20762	242.418	1.57811	0	0.997848
Cell 14	141.421	0.0238634	28.2843	-0.000824484	101.98	Inf	101.98	0.807808		191.378	4.56693	338.384	-0.278992	0	0.492495	74.2952	60.0162
Cell 14	128.062	0.0206769	44.7214	0.000630887	82.4621	0.0687172	107.703	Inf		311.436	6.43952	340.388	0.214746	47.0347	3.23209	0	18.1281
Cell 14	116.619	0.0551441	63.2456	0.00447114	63.2456	0.0248519	116.619	Inf		353.668	19.5027	214.116	0.957342	111.853	2.77975	0	6.81766
Cell 14	107.703	0.111259	82.4621	-0.0285239	44.7214	0.0182499	128.062	Inf		356.448	39.658	91.7765	-2.61782	196.099	3.57879	0	1.77794
Cell 14	101.98	0.131279	101.98	0.218198	28.2843	0.0248514	141.421	Inf		328.929	43.1816	27.0632	5.90514	325.919	8.09954	0	-1.08619
Cell 15	28.2843	0.075867	141.421	Inf	101.98	Inf	101.98	0.0629307		376.662	28.5762	0	2.84452	0	3.59465	78.0766	4.91342
Cell 15	44.7214	0.0997102	128.062	Inf	82.4621	0.388354	107.703	0.0296857		315.48	31.4566	0	1.00848	24.2787	9.42874	129.52	3.84489
Cell 15	63.2456	0.0959384	116.619	Inf	63.2456	0.103482	116.619	0.0291177		302.301	29.0023	0	2.45181	123.724	12.8032	122.154	3.55685
Cell 15	82.4621	0.125057	107.703	0.15829	44.7214	0.0900759	128.062	0.0953151		209.787	26.2353	16.1526	2.55678	240.318	21.6469	48.1181	4.58638
Cell 15	101.98	0.267151	101.98	0.0551208	28.2843	0.0934651	141.421	Inf		102.397	27.3554	49.723	2.74077	318.737	29.7908	0	2.04958
Cell 15	44.7214	0.101487	128.062	Inf	107.703	Inf	82.4621	0.0415739		306.184	31.0737	0	3.75137	0	3.41388	204.775	8.51331
Cell 15	56.5685	0.166491	113.137	0.283827	89.4427	0.210674	89.4427	0.0328368		220.176	36.6572	4.46382	1.26695	50.4099	10.62	283.503	9.30932
Cell 15	72.111	0.120589	100	0.0716512	72.111	0.0996194	100	0.0336379		211.428	25.4959	21.7923	1.56144	161.85	16.1234	209.166	7.03592
Cell 15	89.4427	0.143967	89.4427	0.0365784	56.5685	0.145475	113.137	0.0478632		171.716	24.7216	41.829	1.53003	217.658	31.6639	104.012	4.97832
Cell 15	107.703	0.363918	82.4621	0.0316947	44.7214	0.145386	128.062	0.0335523		86.4195	31.4496	98.8218	3.13213	217.502	31.6217	0.884484	0.0296765
Cell 15	63.2456	0.110845	116.619	Inf	116.619	Inf	63.2456	0.0421455		247.097	27.3896	0	2.62076	0	4.01965	274.913	11.5864
Cell 15	72.111	0.0914886	100	0.0601194	100	0.0838101	72.111	0.0327655		242.257	22.1637	31.5433	1.89637	59.5429	4.9903	326.593	10.701
Cell 15	84.8528	0.188899	84.8528	0.0531205	84.8528	0.134866	84.8528	0.0325081		150.541	28.437	79.0245	4.19782	132.156	17.8234	305.817	9.94152
Cell 15	100	0.171901	72.111	0.044891	72.111	0.225091	100	0.0552091		158.225	27.1989	128.439	5.76576	168.711	37.9752	148.243	8.18434
Cell 15	116.619	0.602798	63.2456	0.0605956	63.2456	0.395059	116.619	0.121996		40.9726	24.6982	164.308	9.95635	105.302	41.6005	36.0027	4.39219
Cell 15	82.4621	0.126275	107.703	Inf	128.062	Inf	44.7214	0.0533512		243.238	30.7148	0	2.90153	0	1.08664	283.742	15.138
Cell 15	89.4427	0.15316	89.4427	0.0859091	113.137	0.321686	56.5685	0.0379677		154.23	23.6218	48.6354	4.17822	21.2146	6.82444	333.538	12.6637
Cell 15	100	0.216708	72.111	0.0317399	100	0.280037	72.111	0.0534607		124.306	26.9381	129.646	4.11496	64.4667	18.0531	320.168	17.1164
Cell 15	113.137	0.148295	56.5685	0.0486156	89.4427	0.717476	89.4427	0.0779914		128.578	19.0675	203.173	9.87737	47.1412	33.8227	193.657	15.1036
Cell 15	128.062	0.308722	44.7214	0.0542411	82.4621	0.677371	107.703	0.10494		57.0066	17.5992	226.124	12.2652	54.0713	36.6263	87.2238	9.15329
Cell 15	101.98	0.0905111	101.98	Inf	141.421	Inf	28.2843	0.068359		211.847	19.1745	0	2.50878	0	4.70798	331.302	22.6474
Cell 15	107.703	0.209123	82.4621	0.357425	128.062	Inf	44.7214	0.0511544		115.085	24.0669	17.6316	6.30199	0	6.97635	396.115	20.263
Cell 15	116.619	0.237194	63.2456	0.0751153	116.619	1.17628	63.2456	0.0575456		110.7	26.2575	115.542	8.67901	15.1481	17.8185	409.034	23.5381
Cell 15	128.062	0.177839	44.7214	0.0488752	107.703	1.20339	82.4621	0.0605125		93.8706	16.6939	267.267	13.0627	23.1471	27.8549	277.89	16.8158
Cell 15	141.421	0.219512	28.2843	0.0557018	101.98	0.344195	101.98	0.103394		59.6891	13.1025	282.637	15.7434	78.9102	27.1605	128.61	13.2975
Cell 16	44.7214	0.0898297	107.703	0.120648	107.703	0.180634	44.7214	0.124098		392.662	35.2727	167.094	20.1596	43.6231	7.87983	378.441	46.9637
Cell 16	28.2843	0.112989	101.98	0.0515756	89.4427	0.128188	56.5685	0.111774		403.677	45.6113	231.443	11.9368	85.0559	10.9032	367.138	41.0366
Cell 16	20	0.177881	100	0.138051	72.111	0.140464	72.111	0.137725		321.885	57.2571	223.248	30.8197	237.158	33.3122	232.204	31.9804
Cell 16	28.2843	0.217333	101.98	0.083093	56.5685	0.121891	89.4427	0.155904		237.576	51.6331	237.336	19.7209	320.561	39.0734	129.289	20.1567
Cell 16	44.7214	0.194866	107.703	0.0825373	44.7214	0.132001	107.703	0.189963		191.92	37.3988	205.769	16.9837	356.583	47.0695	43.0739	8.18247
Cell 16	56.5685	0.109751	89.4427	0.117086	101.98	0.0565959	28.2843	0.139695		295.815	32.4661	283.139	33.1517	112.87	6.38797	332.852	46.4979
Cell 16	44.7214	0.169874	82.4621	0.108375	82.4621	0.0745446	44.7214	0.101319		287.544	48.8462	256.891	27.8405	186.842	13.928	313.812	31.7952
Cell 16	40	0.200642	80	0.124359	63.2456	0.0632057	63.2456	0.0782273		212.649	42.6663	280	34.8206	312.671	19.7625	231.118	18.0798
Cell 16	44.7214	0.226095	82.4621	0.111379	44.7214	0.0785147	82.4621	0.205156		191.228	43.2358	312.054	34.7562	356.227	27.969	106.971	21.9457
Cell 16	56.5685	0.2112	89.4427	0.102639	28.2843	0.102523	101.98	0.174239		138.917	29.3393	273.36	28.0573	410.019	42.0364	62.3935	10.8714
Cell 16	72.111	0.0997431	72.111	0.119601	100	0.0550162	20	0.150077		228.31	22.7723	323.211	38.6565	170.524	9.38157	299.978	45.0197
Cell 16	63.2456	0.17144	63.2456	0.113512	80	0.053319	40	0.129349		176.374	30.2376	354.216	40.2078	280.229	14.9415	263.254	34.0518
Cell 16	60	0.200223	60	0.152563	60	0.0733365	60	0.107652		118.959	23.8183	321.535	49.0544	335.759	24.6234	169.959	18.2964
Cell 16	63.2456	0.19196	63.2456	0.0940295	40	0.0822699	80	0.230416		116.627	22.3876	367.707	34.5753	442.465	36.4015	92.9759	21.4231
Cell 16	72.111	0.343645	72.111	0.0760787	20	0.0859962	100	0.200151		77.8008	26.7359	353.337	26.8814	448.951	38.6081	57.6578	11.5403
Cell 16	89.4427	0.117816	56.5685	0.121891	101.98	0.0530137	28.2843	0.217333		191.175	22.5235	320.561	39.0734	198.761	10.5371	237.576	51.6331
Cell 16	82.4621	0.240997	44.7214	0.132001	82.4621	0.0356419	44.7214	0.194866		134.288	32.363	356.583	47.0695	276.166	9.84309	191.92	37.3988
Cell 16	80	0.251548	40	0.141352	63.2456	0.0667781	63.2456	0.280352		110.801	27.8717	351.536	49.6903	328.206	21.917	86.3627	24.212
Cell 16	82.4621	0.401839	44.7214	0.124098	44.7214	0.0898297	82.4621	0.338884		48.4409	19.4654	378.441	46.9637	392.662	35.2727	37.119	12.579
Cell 16	89.4427	0.639223	56.5685	0.111774	28.2843	0.112989	101.98	Inf		33.3452	21.315	367.138	41.0366	403.677	45.6113	0	7.16913
Cell 16	107.703	0.310025	44.7214	0.0785147	107.703	0.0543309	44.7214	0.226095		110.052	34.1188	356.227	27.969	174.811	9.49762	191.228	43.2358
Cell 16	101.98	0.295501	28.2843	0.102523	89.4427	0.0538586	56.5685	0.2112		102.574	30.3108	410.019	42.0364	250.88	13.5121	138.917	29.3393
Cell 16	100	0.379665	20	0.138803	72.111	0.0789934	72.111	0.617198		64.0365	24.3124	392.55	54.4873	280.118	22.1275	44.6445	27.5545
Cell 16	101.98	1.81051	28.2843	0.139695	56.5685	0.109751	89.4427	Inf		11.6756	21.1389	332.852	46.4979	295.815	32.4661	0	20.3154
Cell 16	107.703	Inf	44.7214	0.101319	44.7214	0.169874	107.703	Inf		0	22.3775	313.812	31.7952	287.544	48.8462	0	8.06061

## Sheet: 3F
On	Distance Pref side	Pref ChT/dend len	Distance Null side	Null ChT/dend len	Distance Pref + 90	Pref + 90 ChT/dend len	Distance Pref -90	Pref-90 ChT/den len		Pref den len	Pref ChT	Null den len	Null ChT	Pref + 90 len	Pref + 90 ChT	Pref -90 len	Pref-90 ChT
Cell 1	44.7214	0.361615	107.703	Inf	107.703	0.0531511	44.7214	0.133164		301.043	108.862	0	2.92845	73.5332	3.90837	373.292	49.709
Cell 1	28.2843	0.26101	101.98	0.096479	89.4427	0.0207062	56.5685	0.0838969		323.082	84.3277	42.2433	4.07559	182.024	3.76902	310.045	26.0118
Cell 1	20	0.187063	100	0.0214369	72.111	0.0475711	72.111	0.0786217		304.34	56.9307	68.3674	1.46559	240.147	11.424	188.592	14.8274
Cell 1	28.2843	0.188604	101.98	0.0403189	56.5685	0.120472	89.4427	0.0695448		259.44	48.9314	132.06	5.32452	286.453	34.5095	59.8982	4.16561
Cell 1	44.7214	0.195979	107.703	0.0637613	44.7214	0.209411	107.703	0.162329		227.29	44.5441	113.621	7.24465	327.81	68.6468	5.48742	0.890766
Cell 1	56.5685	0.319428	89.4427	1.39804	101.98	0.117365	28.2843	0.204383		275.194	87.9048	5.1334	7.1767	80.9127	9.49629	331.125	67.6763
Cell 1	44.7214	0.29577	82.4621	0.1771	82.4621	0.0728919	44.7214	0.097115		327.019	96.7224	76.9739	13.6321	205.481	14.9779	242.277	23.5288
Cell 1	40	0.264876	80	0.0862081	63.2456	0.172445	63.2456	0.089688		280.566	74.3153	169.972	14.653	306.738	52.8955	165.312	14.8265
Cell 1	44.7214	0.167237	82.4621	0.0750419	44.7214	0.215072	82.4621	0.098438		261.267	43.6936	270.345	20.2872	375.191	80.6931	59.743	5.88098
Cell 1	56.5685	0.273309	89.4427	0.048748	28.2843	0.283459	101.98	0.170635		188.844	51.6127	278.504	13.5765	375.456	106.427	11.7217	2.00014
Cell 1	72.111	0.340886	72.111	0.082682	100	0.317262	20	0.161335		278.362	94.8899	147.82	12.2221	66.965	21.2454	270.885	43.7033
Cell 1	63.2456	0.288639	63.2456	0.208145	80	0.22145	40	0.108928		319.743	92.2905	194.11	40.403	204.362	45.2559	201.482	21.9471
Cell 1	60	0.176705	60	0.161928	60	0.254033	60	0.0996283		335.134	59.2197	301.905	48.8868	246.325	62.5748	154.818	15.4243
Cell 1	63.2456	0.171846	63.2456	0.105136	40	0.357964	80	0.102578		285.408	49.0463	377.902	39.7309	295.267	105.695	66.7657	6.84872
Cell 1	72.111	0.18707	72.111	0.0638343	20	0.293453	100	0.278232		161.498	30.2114	353.77	22.5827	338.585	99.3587	13.3171	3.70525
Cell 1	89.4427	0.326775	56.5685	0.120472	101.98	0.221633	28.2843	0.188604		255.445	83.4732	286.453	34.5095	102.387	22.6923	259.44	48.9314
Cell 1	82.4621	0.403427	44.7214	0.209411	82.4621	0.293671	44.7214	0.195979		251.547	101.481	327.81	68.6468	143.999	42.2883	227.29	44.5441
Cell 1	80	0.222279	40	0.226616	63.2456	0.337069	63.2456	0.185399		276.153	61.383	383.855	86.9877	232.539	78.3817	145.392	26.9555
Cell 1	82.4621	0.227922	44.7214	0.133164	44.7214	0.361615	82.4621	0.190803		220.334	50.2189	373.292	49.709	301.043	108.862	68.0603	12.9861
Cell 1	89.4427	0.31709	56.5685	0.0838969	28.2843	0.26101	101.98	0.22363		121.916	38.6582	310.045	26.0118	323.082	84.3277	14.1201	3.15767
Cell 1	107.703	0.387562	44.7214	0.215072	107.703	0.154063	44.7214	0.167237		183.344	71.0572	375.191	80.6931	87.3589	13.4588	261.267	43.6936
Cell 1	101.98	0.368887	28.2843	0.283459	89.4427	0.170054	56.5685	0.273309		222.319	82.0105	375.456	106.427	159.797	27.1742	188.844	51.6127
Cell 1	100	0.320982	20	0.178812	72.111	0.2376	72.111	0.326142		177.453	56.9591	378.729	67.7213	225.826	53.6564	97.9561	31.9476
Cell 1	101.98	0.466446	28.2843	0.204383	56.5685	0.319428	89.4427	0.376095		97.4604	45.46	331.125	67.6763	275.194	87.9048	45.2871	17.0323
Cell 1	107.703	0.567658	44.7214	0.097115	44.7214	0.29577	107.703	1.20106		32.905	18.6788	242.277	23.5288	327.019	96.7224	5.82633	6.99777
Cell 2	101.98	0.343483	101.98	0.134012	141.421	Inf	28.2843	0.0556096		11.3829	3.90982	59.8136	8.01576	0	1.91433	182.209	10.1326
Cell 2	82.4621	0.0924283	107.703	0.0767031	128.062	Inf	44.7214	0.194694		99.6641	9.21179	72.5891	5.56781	0	1.05708	41.6304	8.10518
Cell 2	63.2456	0.0849145	116.619	0.0835252	116.619	Inf	63.2456	Inf		160.887	13.6616	39.1406	3.26922	0	1.76291	0	4.73969
Cell 2	44.7214	0.0887506	128.062	Inf	107.703	Inf	82.4621	Inf		208.007	18.4608	0	2.90303	0	4.91546	0	3.06142
Cell 2	28.2843	0.0704691	141.421	Inf	101.98	0.46222	101.98	Inf		276.949	19.5164	0	1.46463	14.1208	6.52692	0	0.183545
Cell 2	107.703	0.195384	82.4621	0.0916702	128.062	Inf	44.7214	0.0671193		34.1663	6.67554	132.722	12.1667	0	3.53738	275.911	18.519
Cell 2	89.4427	0.08183	89.4427	0.0542208	113.137	Inf	56.5685	0.0866493		150.09	12.2819	154.668	8.38622	0	3.98944	115.381	9.99771
Cell 2	72.111	0.058596	100	0.0900427	100	0.309102	72.111	4.66422		244.676	14.3371	105.916	9.53693	20.7259	6.4064	1.24022	5.78465
Cell 2	56.5685	0.0660465	113.137	0.146719	89.4427	0.104189	89.4427	Inf		318.294	21.0222	29.5909	4.34154	70.949	7.39208	0	2.34675
Cell 2	44.7214	0.0597789	128.062	Inf	82.4621	0.118105	107.703	Inf		376.256	22.4922	0	2.74979	78.8665	9.31457	0	1.6228
Cell 2	116.619	0.110828	63.2456	0.0809456	116.619	Inf	63.2456	0.0637648		59.2316	6.56453	223.005	18.0513	0	6.75816	343.592	21.9091
Cell 2	100	0.0777393	72.111	0.0563991	100	0.781389	72.111	0.096917		184.496	14.3426	282.97	15.9592	8.99365	7.02754	179.38	17.3849
Cell 2	84.8528	0.047906	84.8528	0.0493454	84.8528	0.262936	84.8528	0.382347		282.969	13.5559	184.397	9.09916	33.1462	8.71532	28.5793	10.9272
Cell 2	72.111	0.0535051	100	0.0731637	72.111	0.130725	100	Inf		333.837	17.862	85.6443	6.26605	114.991	15.0323	0	4.96659
Cell 2	63.2456	0.051166	116.619	1.35231	63.2456	0.121265	116.619	Inf		469.795	24.0375	2.76828	3.74356	148.942	18.0614	0	3.26352
Cell 2	128.062	0.114428	44.7214	0.0612161	107.703	Inf	82.4621	0.0815948		81.3256	9.30591	300.992	18.4256	0	5.80361	316.418	25.8181
Cell 2	113.137	0.05594	56.5685	0.0538057	89.4427	1.60633	89.4427	0.0929818		203.784	11.3997	270.459	14.5522	5.6643	9.09873	176.32	16.3945
Cell 2	100	0.0602333	72.111	0.0287225	72.111	0.205255	100	0.189448		287.55	17.3201	188.459	5.41303	55.1256	11.3148	73.0356	13.8364
Cell 2	89.4427	0.0662737	89.4427	0.0489059	56.5685	0.152753	113.137	0.849608		343.601	22.7717	106.505	5.20872	125.591	19.1843	8.70557	7.39632
Cell 2	82.4621	0.0697872	107.703	0.129466	44.7214	0.0848213	128.062	Inf		394.05	27.4997	41.051	5.31469	216.409	18.3561	0	3.3124
Cell 2	141.421	0.113522	28.2843	0.0443368	101.98	Inf	101.98	0.110345		64.3737	7.30782	302.288	13.4025	0	3.26038	187.734	20.7155
Cell 2	128.062	0.0603389	44.7214	0.0310739	82.4621	Inf	107.703	0.152938		134.885	8.13881	219.782	6.8295	0	8.58356	109.763	16.787
Cell 2	116.619	0.0779282	63.2456	0.0348464	63.2456	0.587945	116.619	0.274478		199.638	15.5574	140.181	4.88479	28.1637	16.5587	51.337	14.0908
Cell 2	107.703	0.084172	82.4621	0.0638629	44.7214	0.454358	128.062	0.324077		242.563	20.417	61.8803	3.95186	46.1399	20.964	15.3558	4.97648
Cell 2	101.98	0.0725391	101.98	0.0780879	28.2843	0.108986	141.421	Inf		280.06	20.3153	37.6393	2.93918	205.426	22.3887	0	4.93301
Cell 3	44.7214	0.112049	107.703	Inf	107.703	0.0555475	44.7214	0.0727622		314.848	35.2784	0	1.2071	15.8002	0.87766	198.484	14.4421
Cell 3	28.2843	0.104624	101.98	Inf	89.4427	0.0442639	56.5685	0.0567137		354.672	37.1071	0	0.546014	63.8203	2.82494	189.059	10.7222
Cell 3	20	0.0684129	100	Inf	72.111	0.0481638	72.111	0.092722		363.085	24.8397	0	1.89727	137.133	6.60483	95.7617	8.87921
Cell 3	28.2843	0.0708186	101.98	0.0803631	56.5685	0.0429836	89.4427	0.104493		326.104	23.0943	9.84165	0.790905	268.137	11.5255	25.7415	2.6898
Cell 3	44.7214	0.0558372	107.703	0.146133	44.7214	0.0589098	107.703	Inf		322.193	17.9903	5.61932	0.82117	246.225	14.5051	0	1.13517
Cell 3	56.5685	0.0890827	89.4427	0.0144955	101.98	0.0259057	28.2843	0.0726186		331.014	29.4877	36.1173	0.523539	42.233	1.09408	236.566	17.1791
Cell 3	44.7214	0.0998897	82.4621	0.0655453	82.4621	0.0377227	44.7214	0.0664016		351.366	35.0979	46.1383	3.02415	127.384	4.80525	255.435	16.9612
Cell 3	40	0.080693	80	0.0206609	63.2456	0.0748124	63.2456	0.0850402		354.738	28.6249	23.8612	0.492995	215.144	16.0955	175.305	14.9079
Cell 3	44.7214	0.0507398	82.4621	0.0823793	44.7214	0.0613746	82.4621	0.0621458		342.219	17.3642	35.9484	2.9614	287.964	17.6737	100.259	6.23069
Cell 3	56.5685	0.0424073	89.4427	0.0831871	28.2843	0.116617	101.98	0.266452		385.037	16.3284	25.7828	2.1448	285.832	33.3329	16.6853	4.44582
Cell 3	72.111	0.127383	72.111	0.0274	100	0.0351064	20	0.0595385		256.314	32.6502	128.073	3.50922	113.25	3.97582	302.667	18.0203
Cell 3	63.2456	0.07467	63.2456	0.0575429	80	0.0646377	40	0.0688156		378.59	28.2693	111.081	6.3919	156.314	10.1038	264.149	18.1776
Cell 3	60	0.0690307	60	0.0420142	60	0.0826292	60	0.0630244		375.965	25.9532	138.513	5.8195	257.983	21.3169	226.753	14.291
Cell 3	63.2456	0.0521203	63.2456	0.06226	40	0.118101	80	0.0781037		377.596	19.6804	100.655	6.26678	273.192	32.2641	149.933	11.7103
Cell 3	72.111	0.0410871	72.111	0.0364724	20	0.0814818	100	0.0903793		387.825	15.9346	88.4131	3.22464	358.557	29.2159	60.8496	5.49954
Cell 3	89.4427	0.102253	56.5685	0.0429836	101.98	0.0429625	28.2843	0.0708186		196.925	20.1362	268.137	11.5255	121.834	5.23431	326.104	23.0943
Cell 3	82.4621	0.0709294	44.7214	0.0589098	82.4621	0.0388675	44.7214	0.0558372		332.842	23.6083	246.225	14.5051	203.454	7.90774	322.193	17.9903
Cell 3	80	0.0462135	40	0.0580173	63.2456	0.0989771	63.2456	0.0435639		381.176	17.6155	220.108	12.7701	270.874	26.8103	327.531	14.2685
Cell 3	82.4621	0.0339517	44.7214	0.0727622	44.7214	0.112049	82.4621	0.0679123		402.069	13.6509	198.484	14.4421	314.848	35.2784	218.425	14.8337
Cell 3	89.4427	0.0667357	56.5685	0.0567137	28.2843	0.104624	101.98	0.0986375		355.03	23.6931	189.059	10.7222	354.672	37.1071	94.4621	9.3175
Cell 3	107.703	0.0755278	44.7214	0.0613746	107.703	0.0599755	44.7214	0.0507398		132.023	9.9714	287.964	17.6737	124.999	7.49685	342.219	17.3642
Cell 3	101.98	0.0331957	28.2843	0.116617	89.4427	0.0634691	56.5685	0.0424073		275.857	9.15729	285.832	33.3329	229.674	14.5772	385.037	16.3284
Cell 3	100	0.0268163	20	0.0798427	72.111	0.0836132	72.111	0.0482793		351.276	9.41993	301.422	24.0664	271.727	22.7199	363.611	17.5549
Cell 3	101.98	0.0470922	28.2843	0.0726186	56.5685	0.0890827	89.4427	0.074179		298.065	14.0365	236.566	17.1791	331.014	29.4877	219.648	16.2933
Cell 3	107.703	0.0802142	44.7214	0.0664016	44.7214	0.0998897	107.703	0.0939152		256.292	20.5582	255.435	16.9612	351.366	35.0979	78.7096	7.39203
Cell 4	44.7214	0.0848683	107.703	0.0470146	107.703	0.208308	44.7214	0.0170645		389.102	33.0224	129.121	6.07058	40.4164	8.41907	430.689	7.34948
Cell 4	28.2843	0.168535	101.98	0.0435389	89.4427	0.117424	56.5685	0.00780224		281.027	47.3628	189.666	8.25785	106.302	12.4824	408.167	3.18462
Cell 4	20	0.0785385	100	0.0275847	72.111	0.0803952	72.111	0.00569586		294.968	23.1663	211.608	5.83714	256.852	20.6496	339.71	1.93494
Cell 4	28.2843	0.0485422	101.98	0.0242859	56.5685	0.135594	89.4427	0.00508405		289.709	14.0631	223.049	5.41693	289.502	39.2547	127.656	0.64901
Cell 4	44.7214	0.0569869	107.703	0.0335693	44.7214	0.0571771	107.703	0.0252332		320.118	18.2425	195.393	6.5592	338.596	19.3599	14.9739	0.377839
Cell 4	56.5685	0.0759653	89.4427	0.0692543	101.98	0.104887	28.2843	0.0389817		360.153	27.3591	211.244	14.6295	117.091	12.2814	330.536	12.8849
Cell 4	44.7214	0.105918	82.4621	0.0591964	82.4621	0.132856	44.7214	0.0113195		255.742	27.0878	275.837	16.3285	170.905	22.7057	406.219	4.59818
Cell 4	40	0.111377	80	0.0160853	63.2456	0.0887084	63.2456	0.00020566		180.857	20.1433	319.979	5.14696	274.59	24.3584	351.554	0.0723007
Cell 4	44.7214	0.0891052	82.4621	0.0297239	44.7214	0.106498	82.4621	0.0084541		185.004	16.4848	297.136	8.83206	292.019	31.0995	168.463	1.42421
Cell 4	56.5685	0.0398381	89.4427	0.0234737	28.2843	0.124166	101.98	0.0349212		254.8	10.1508	287.661	6.75248	284.539	35.3301	46.6732	1.62989
Cell 4	72.111	0.101913	72.111	0.0446843	100	0.109262	20	0.0498098		242.804	24.7448	234.989	10.5003	126.919	13.8674	328.339	16.3545
Cell 4	63.2456	0.12209	63.2456	0.0438123	80	0.0692106	40	0.0111124		184.901	22.5746	318.342	13.9473	285.207	19.7393	348.977	3.87799
Cell 4	60	0.148869	60	0.0181995	60	0.0814752	60	0.0107331		104.693	15.5855	343	6.24242	329.798	26.8704	300.406	3.22427
Cell 4	63.2456	0.164421	63.2456	0.0166705	40	0.117791	80	0.0142658		59.542	9.78996	356.578	5.94433	301.414	35.5038	194.753	2.77832
Cell 4	72.111	0.066493	72.111	0.00584356	20	0.111566	100	0.0217134		91.1972	6.06398	383.766	2.24256	287.721	32.0998	58.6919	1.2744
Cell 4	89.4427	0.176947	56.5685	0.135594	101.98	0.0639634	28.2843	0.0485422		119.782	21.1951	289.502	39.2547	286.645	18.3348	289.709	14.0631
Cell 4	82.4621	0.14987	44.7214	0.0571771	82.4621	0.108643	44.7214	0.0569869		96.3086	14.4338	338.596	19.3599	332.602	36.135	320.118	18.2425
Cell 4	80	0.448018	40	0.0420653	63.2456	0.0998089	63.2456	0.00658137		31.9605	14.3189	370.213	15.5731	430.582	42.9759	316.351	2.08202
Cell 4	82.4621	Inf	44.7214	0.0170645	44.7214	0.0848683	82.4621	-0.00127419		0	5.58723	430.689	7.34948	389.102	33.0224	202.592	-0.258142
Cell 4	89.4427	Inf	56.5685	0.00780224	28.2843	0.168535	101.98	-0.00973391		0	0.712428	408.167	3.18462	281.027	47.3628	48.5389	-0.472473
Cell 4	107.703	0.340119	44.7214	0.106498	107.703	0.0665709	44.7214	0.0891052		37.3738	12.7115	292.019	31.0995	357.949	23.829	185.004	16.4848
Cell 4	101.98	0.352819	28.2843	0.124166	89.4427	0.0979038	56.5685	0.0398381		32.4884	11.4625	284.539	35.3301	363.184	35.5571	254.8	10.1508
Cell 4	100	0.715106	20	0.101048	72.111	0.0884378	72.111	0.0118664		10.1272	7.242	324.729	32.8131	380.933	33.6888	197.171	2.33972
Cell 4	101.98	Inf	28.2843	0.0389817	56.5685	0.0759653	89.4427	0.0173108		0	4.68093	330.536	12.8849	360.153	27.3591	121.503	2.1033
Cell 4	107.703	Inf	44.7214	0.0113195	44.7214	0.105918	107.703	0.0459131		0	0.154056	406.219	4.59818	255.742	27.0878	23.011	1.05651
Cell 5	101.98	0.0550514	101.98	0.142406	141.421	Inf	28.2843	0.0800263		32.0957	1.76691	19.5567	2.78499	0	1.13259	300.754	24.0683
Cell 5	82.4621	0.0305806	107.703	0.303747	128.062	Inf	44.7214	0.187783		101.001	3.08867	10.3887	3.15554	0	0.880384	210.241	39.4797
Cell 5	63.2456	0.0221712	116.619	Inf	116.619	Inf	63.2456	0.107935		214.174	4.7485	0	3.41095	0	1.26354	264.68	28.5682
Cell 5	44.7214	0.0226729	128.062	0.0975761	107.703	Inf	82.4621	0.116642		285.78	6.47945	27.0309	2.63757	0	1.22756	271.841	31.7082
Cell 5	28.2843	0.0299885	141.421	0.165819	101.98	0.104743	101.98	0.106372		306.072	9.17863	20.3026	3.36654	19.2361	2.01485	279.477	29.7287
Cell 5	107.703	1.08203	82.4621	0.0635521	128.062	0.714365	44.7214	0.0958695		1.75928	1.90359	122.043	7.7561	1.97364	1.4099	309.358	29.658
Cell 5	89.4427	0.0778249	89.4427	0.0822245	113.137	0.0322722	56.5685	0.183288		37.0895	2.88649	96.3147	7.91943	35.0217	1.13023	230.56	42.259
Cell 5	72.111	0.0178062	100	0.0854819	100	0.0327783	72.111	0.238051		159.568	2.8413	130.938	11.1928	39.8257	1.30542	182.261	43.3874
Cell 5	56.5685	0.0206089	113.137	0.0946844	89.4427	0.13275	89.4427	0.158222		188.046	3.87544	105.852	10.0226	5.7302	0.760683	159.185	25.1866
Cell 5	44.7214	0.0269522	128.062	0.158296	82.4621	0.0431589	107.703	0.0600491		250.471	6.75075	77.3591	12.2457	70.1299	3.02673	184.654	11.0883
Cell 5	116.619	Inf	63.2456	0.0786164	116.619	0.0808675	63.2456	0.0858988		0	1.41269	262.567	20.6421	23.2696	1.88176	241.395	20.7355
Cell 5	100	0.350415	72.111	0.0829396	100	0.0305993	72.111	0.114413		6.12172	2.14514	263.901	21.8878	52.4212	1.60405	232.093	26.5544
Cell 5	84.8528	0.0420242	84.8528	0.0735147	84.8528	0.0241766	84.8528	0.169975		47.6175	2.00109	301.006	22.1284	74.5107	1.80142	134.495	22.8609
Cell 5	72.111	0.0637836	100	0.157066	72.111	0.0433558	100	0.16561		63.5867	4.05579	242.189	38.0396	102.109	4.42703	115.573	19.1399
Cell 5	63.2456	0.0637049	116.619	0.166307	63.2456	0.0476827	116.619	0.180823		83.769	5.3365	196.627	32.7005	125.225	5.97105	78.6363	14.2192
Cell 5	128.062	Inf	44.7214	0.0710432	107.703	0.0712651	82.4621	0.0378841		0	0.837241	345.71	24.5603	27.237	1.94105	115.613	4.37989
Cell 5	113.137	Inf	56.5685	0.0613472	89.4427	0.0224544	89.4427	0.0497188		0	1.17704	381.701	23.4163	114.111	2.56229	130.292	6.47797
Cell 5	100	0.215801	72.111	0.0657987	72.111	0.0284736	100	0.211902		8.18677	1.76672	370.924	24.4063	175.72	5.00337	69.8567	14.8028
Cell 5	89.4427	0.262336	89.4427	0.110027	56.5685	0.0382651	113.137	0.308174		10.2637	2.69254	349.756	38.4827	182.588	6.98674	44.9644	13.8568
Cell 5	82.4621	Inf	107.703	0.190945	44.7214	0.189643	128.062	0.733146		0	2.51778	241.104	46.0376	238.169	45.1671	11.8653	8.69902
Cell 5	141.421	Inf	28.2843	0.100557	101.98	0.0337146	101.98	0.116184		0	0.441406	307.869	30.9583	60.6249	2.04395	13.8171	1.60532
Cell 5	128.062	Inf	44.7214	0.0371921	82.4621	0.0219228	107.703	0.143705		0	0.517239	381.411	14.1854	112.925	2.47564	20.7817	2.98642
Cell 5	116.619	Inf	63.2456	0.025171	63.2456	0.0220308	116.619	0.102193		0	1.36343	374.685	9.43121	206.404	4.54724	33.2516	3.39808
Cell 5	107.703	Inf	82.4621	0.0733274	44.7214	0.148151	128.062	0.474514		0	1.25041	360.449	26.4308	245.675	36.3971	10.5762	5.01857
Cell 5	101.98	Inf	101.98	0.131261	28.2843	0.175009	141.421	Inf		0	1.41074	265.404	34.8373	249.59	43.6805	0	3.08504
Cell 6	44.7214	0.220124	107.703	Inf	107.703	-0.0207354	44.7214	0.143442		133.842	29.4619	0	2.87675	5.93841	-0.123135	232.613	33.3665
Cell 6	28.2843	0.169194	101.98	0.327941	89.4427	0.0430504	56.5685	0.165959		189.937	32.1362	5.79997	1.90205	61.5521	2.64984	234.318	38.887
Cell 6	20	0.164922	100	0.428114	72.111	0.0292173	72.111	0.1306		213.172	35.1569	17.6047	7.53681	106.459	3.11045	274.049	35.7908
Cell 6	28.2843	0.114803	101.98	0.415694	56.5685	0.0987072	89.4427	0.188177		249.427	28.6351	20.8163	8.6532	138.777	13.6983	208.106	39.1607
Cell 6	44.7214	0.155135	107.703	0.31811	44.7214	0.119833	107.703	0.20966		211.904	32.8739	34.9511	11.1183	193.707	23.2124	193.971	40.6678
Cell 6	56.5685	0.202362	89.4427	Inf	101.98	-0.0720712	28.2843	0.125959		154.32	31.2286	0	0.752777	22.8601	-1.64755	265.727	33.4706
Cell 6	44.7214	0.239139	82.4621	0.0628722	82.4621	0.0486482	44.7214	0.124896		141.422	33.8196	51.4851	3.23698	81.0488	3.94288	213.147	26.6211
Cell 6	40	0.224851	80	0.127246	63.2456	0.091523	63.2456	0.180608		163.33	36.7248	95.48	12.1494	121.537	11.1234	193.169	34.8879
Cell 6	44.7214	0.112223	82.4621	0.118705	44.7214	0.0773893	82.4621	0.15557		211.377	23.7214	85.8198	10.1873	205.721	15.9206	202.918	31.568
Cell 6	56.5685	0.127263	89.4427	0.196694	28.2843	0.123009	101.98	0.187549		186.654	23.7541	118.675	23.3427	220.949	27.1788	210.928	39.5594
Cell 6	72.111	0.240296	72.111	0.0504707	100	0.126109	20	0.139571		118.254	28.416	88.4188	4.46256	33.952	4.28165	252.305	35.2145
Cell 6	63.2456	0.305977	63.2456	0.0768223	80	0.0987644	40	0.125112		125.862	38.5108	123.472	9.48542	114.248	11.2836	204.097	25.535
Cell 6	60	0.214969	60	0.0908117	60	0.0688335	60	0.170732		116.028	24.9424	190.368	17.2876	182.316	12.5494	220.465	37.6405
Cell 6	63.2456	0.170974	63.2456	0.0986378	40	0.147498	80	0.137759		177.95	30.4247	229.377	22.6252	153.764	22.6799	247.436	34.0865
Cell 6	72.111	0.1238	72.111	0.105344	20	0.164568	100	0.167508		196.03	24.2685	209.855	22.107	210.238	34.5985	264.798	44.3558
Cell 6	89.4427	0.301525	56.5685	0.0987072	101.98	0.105056	28.2843	0.114803		110.277	33.2512	138.777	13.6983	52.0519	5.46834	249.427	28.6351
Cell 6	82.4621	0.283078	44.7214	0.119833	82.4621	0.106257	44.7214	0.155135		117.203	33.1777	193.707	23.2124	120.131	12.7647	211.904	32.8739
Cell 6	80	0.132237	40	0.0898048	63.2456	0.126939	63.2456	0.156731		147.782	19.5423	258.308	23.1973	167.145	21.2172	179.451	28.1256
Cell 6	82.4621	0.171149	44.7214	0.143442	44.7214	0.220124	82.4621	0.148096		179.038	30.6421	232.613	33.3665	133.842	29.4619	228.257	33.8039
Cell 6	89.4427	0.182545	56.5685	0.165959	28.2843	0.169194	101.98	0.200382		200.826	36.6597	234.318	38.887	189.937	32.1362	248.635	49.8219
Cell 6	107.703	0.369218	44.7214	0.0773893	107.703	0.242781	44.7214	0.112223		80.5388	29.7364	205.721	15.9206	29.2256	7.09543	211.377	23.7214
Cell 6	101.98	0.188098	28.2843	0.123009	89.4427	0.211154	56.5685	0.127263		143.635	27.0175	220.949	27.1788	97.4474	20.5764	186.654	23.7541
Cell 6	100	0.189415	20	0.10841	72.111	0.210127	72.111	0.107255		172.128	32.6036	261.872	28.3895	157.681	33.133	217.091	23.2842
Cell 6	101.98	0.174824	28.2843	0.125959	56.5685	0.202362	89.4427	0.141009		205.581	35.9404	265.727	33.4706	154.32	31.2286	213.829	30.1519
Cell 6	107.703	0.252012	44.7214	0.124896	44.7214	0.239139	107.703	0.216277		200.333	50.4863	213.147	26.6211	141.422	33.8196	219.561	47.4859
Cell 7	101.98	0.0923986	101.98	0.102515	141.421	Inf	28.2843	0.0665771		155.356	14.3547	11.0478	1.13256	0	1.30869	100.118	6.66558
Cell 7	82.4621	0.0764135	107.703	0.0555304	128.062	0.202304	44.7214	0.0578487		224.395	17.1468	7.70764	0.428008	6.93649	1.40328	93.6959	5.42019
Cell 7	63.2456	0.101224	116.619	0.134931	116.619	0.0354635	63.2456	0.0405453		274.053	27.7408	3.61719	0.48807	14.1316	0.501156	66.2298	2.6853
Cell 7	44.7214	0.0745089	128.062	Inf	107.703	Inf	82.4621	0.0675666		235.521	17.5484	0	0.624081	0	0.694074	22.7312	1.53587
Cell 7	28.2843	0.0642889	141.421	Inf	101.98	0.122599	101.98	Inf		204.005	13.1152	0	0.961115	4.61509	0.565804	0	1.08833
Cell 7	107.703	0.0577647	82.4621	0.0297766	128.062	Inf	44.7214	0.209872		203.738	11.7689	52.3703	1.55941	0	1.08956	56.8659	11.9346
Cell 7	89.4427	0.115315	89.4427	0.0174537	113.137	0.0394454	56.5685	0.343622		224.216	25.8555	51.4039	0.897187	28.1968	1.11224	36.4747	12.5335
Cell 7	72.111	0.0765019	100	0.0215394	100	0.0239169	72.111	0.236673		260.195	19.9054	38.7882	0.835472	36.4441	0.871631	23.6039	5.58641
Cell 7	56.5685	0.0636368	113.137	0.136301	89.4427	0.0140202	89.4427	0.162285		267.768	17.0399	8.18903	1.11617	72.7285	1.01967	15.6894	2.54616
Cell 7	44.7214	0.0813233	128.062	Inf	82.4621	0.0177961	107.703	Inf		166.166	13.5132	0	0.235764	61.9272	1.10207	0	1.55576
Cell 7	116.619	0.165956	63.2456	0.0190002	116.619	0.0551111	63.2456	0.740428		95.3464	15.8233	141.514	2.68881	26.2636	1.44742	27.7124	20.519
Cell 7	100	0.115444	72.111	0.0301511	100	0.0308017	72.111	Inf		202.771	23.4088	126.185	3.80461	86.1952	2.65496	0	12.6883
Cell 7	84.8528	0.0890655	84.8528	0.0286684	84.8528	0.0223775	84.8528	Inf		237.815	21.1811	67.1254	1.92438	113.985	2.55069	0	7.53352
Cell 7	72.111	0.101329	100	0.0286109	72.111	0.013377	100	Inf		224.635	22.7621	42.358	1.2119	183.035	2.44845	0	2.86361
Cell 7	63.2456	0.0807666	116.619	Inf	63.2456	0.0212248	116.619	Inf		187.255	15.124	0	0.82906	179.186	3.80318	0	1.66037
Cell 7	128.062	0.141524	44.7214	0.0410359	107.703	0.0399586	82.4621	1.48498		75.7873	10.7257	176.76	7.2535	60.405	2.4137	10.3557	15.378
Cell 7	113.137	0.19172	56.5685	0.0379252	89.4427	0.0267513	89.4427	Inf		110.897	21.2612	117.809	4.46793	138.811	3.71337	0	9.16611
Cell 7	100	0.158988	72.111	0.053695	72.111	0.0254776	100	Inf		150.971	24.0026	63.0698	3.38653	202.744	5.16542	0	3.34856
Cell 7	89.4427	0.0990799	89.4427	0.0661992	56.5685	0.0184222	113.137	Inf		178.21	17.657	23.1953	1.53551	240.701	4.43423	0	2.42878
Cell 7	82.4621	0.114312	107.703	Inf	44.7214	0.0280638	128.062	Inf		135.265	15.4624	0	0.590318	273.925	7.68738	0	0.25408
Cell 7	141.421	1.017	28.2843	0.0814363	101.98	0.0668724	101.98	Inf		22.2519	22.6301	124.211	10.1153	80.4871	5.38236	0	11.2119
Cell 7	128.062	0.414601	44.7214	0.0950185	82.4621	0.0430921	107.703	Inf		57.8619	23.9896	78.8465	7.49187	188.79	8.13536	0	6.18254
Cell 7	116.619	0.266834	63.2456	0.304421	63.2456	0.0534641	116.619	Inf		82.9797	22.1418	10.7434	3.27053	243.474	13.0171	0	2.25504
Cell 7	107.703	0.356186	82.4621	Inf	44.7214	0.0445489	128.062	Inf		52.8543	18.8259	0	1.27238	265.131	11.8113	0	1.1595
Cell 7	101.98	0.381105	101.98	Inf	28.2843	0.0392277	141.421	Inf		53.8168	20.5099	0	0.534185	233.408	9.15608	0	0.0905797
Cell 8	101.98	0.145392	101.98	0.0467347	141.421	0.615784	28.2843	0.0661487		112.914	16.4169	256.479	11.9865	10.0004	6.1581	359.522	23.7819
Cell 8	82.4621	0.101762	107.703	0.0321388	128.062	0.147131	44.7214	0.0603175		223.439	22.7376	204.681	6.5782	57.0326	8.39128	266.098	16.0504
Cell 8	63.2456	0.0762536	116.619	0.0103524	116.619	0.082074	63.2456	0.07685		285.389	21.7619	105.341	1.09053	128.016	10.5068	154.772	11.8942
Cell 8	44.7214	0.0832344	128.062	0.0517536	107.703	0.0604574	82.4621	0.0878051		312.518	26.0122	32.8862	1.70198	213.263	12.8933	83.5973	7.34027
Cell 8	28.2843	0.0733043	141.421	Inf	101.98	0.0728361	101.98	0.0541888		308.509	22.615	0	-0.750139	229.98	16.7508	51.9716	2.81628
Cell 8	107.703	0.0968511	82.4621	0.0515287	128.062	Inf	44.7214	0.0595996		126.117	12.2146	303.253	15.6262	0	6.80681	289.046	17.227
Cell 8	89.4427	0.0844044	89.4427	0.0411814	113.137	0.254808	56.5685	0.0730887		237.111	20.0132	251.263	10.3473	46.7579	11.9143	158.609	11.5925
Cell 8	72.111	0.0717441	100	0.0257886	100	0.0740073	72.111	0.10406		293.199	21.0353	112.973	2.91341	174.296	12.8991	58.92	6.13119
Cell 8	56.5685	0.105357	113.137	0.0626414	89.4427	0.0678358	89.4427	0.246758		239.702	25.2541	32.7609	2.05219	257.436	17.4634	14.9503	3.68911
Cell 8	44.7214	0.0757002	128.062	Inf	82.4621	0.0383956	107.703	Inf		301.11	22.7941	0	0.587168	304.037	11.6737	0	1.14604
Cell 8	116.619	0.131583	63.2456	0.0552233	116.619	10.8745	63.2456	0.0832936		98.9356	13.0182	315.996	17.4503	0.660892	7.1869	212.895	17.7328
Cell 8	100	0.0936569	72.111	0.0432954	100	0.158227	72.111	0.0763108		198.251	18.5676	222.609	9.63794	55.4675	8.77648	133.484	10.1863
Cell 8	84.8528	0.0709904	84.8528	0.04309	84.8528	0.0692112	84.8528	0.163415		304.36	21.6066	120.365	5.18654	211.538	14.6408	32.6041	5.328
Cell 8	72.111	0.075263	100	0.119726	72.111	0.036488	100	Inf		278.959	20.9953	37.911	4.53892	338.151	12.3384	0	2.62188
Cell 8	63.2456	0.0928049	116.619	0.410968	63.2456	0.0436342	116.619	Inf		230.54	21.3952	5.39434	2.2169	359.876	15.7029	0	1.35224
Cell 8	128.062	0.140161	44.7214	0.0583315	107.703	0.965966	82.4621	0.104741		68.5719	9.61113	363.967	21.2308	9.56234	9.2369	122.731	12.855
Cell 8	113.137	0.0925631	56.5685	0.061562	89.4427	0.131803	89.4427	0.127186		171.822	15.9044	293.364	18.0601	101.99	13.4426	54.6938	6.95626
Cell 8	100	0.0981618	72.111	0.0559885	72.111	0.083535	100	Inf		226.156	22.1999	210.039	11.7598	229.114	19.139	0	3.88145
Cell 8	89.4427	0.146837	89.4427	0.0434714	56.5685	0.0544593	113.137	Inf		177.987	26.135	154.049	6.69673	337.845	18.3988	0	2.48711
Cell 8	82.4621	0.124579	107.703	0.0562458	44.7214	0.0761151	128.062	Inf		189.116	23.5599	113.048	6.35848	358.884	27.3165	0	0.695702
Cell 8	141.421	0.109039	28.2843	0.0615729	101.98	0.195769	101.98	0.371533		50.735	5.53207	430.509	26.5077	42.278	8.27672	21.9646	8.16058
Cell 8	128.062	0.198846	44.7214	0.0625751	82.4621	0.130308	107.703	6.2271		78.5978	15.6289	368.813	23.0785	129.325	16.8521	0.691182	4.30406
Cell 8	116.619	0.212452	63.2456	0.0512331	63.2456	0.0938929	116.619	Inf		122.327	25.9887	298.03	15.269	261.86	24.5868	0	1.26567
Cell 8	107.703	0.140491	82.4621	0.048317	44.7214	0.077485	128.062	Inf		136.417	19.1653	243.772	11.7783	301.309	23.3469	0	0.0493781
Cell 8	101.98	0.108377	101.98	0.0511155	28.2843	0.0890018	141.421	Inf		117.507	12.7351	184.046	9.4076	347.961	30.9692	0	1.86496
Cell 9	44.7214	0.106434	107.703	Inf	107.703	0.313653	44.7214	0.104575		356.396	37.9327	0	4.94174	20.0984	6.30392	297.514	31.1126
Cell 9	28.2843	0.100888	101.98	0.0978952	89.4427	0.210185	56.5685	0.0456728		387.175	39.0615	33.0606	3.23647	113.738	23.9061	246.024	11.2366
Cell 9	20	0.125702	100	0.0193451	72.111	0.187172	72.111	0.0769395		420.842	52.9008	56.8308	1.0994	154.05	28.8338	205.55	15.8149
Cell 9	28.2843	0.0856382	101.98	0.0625452	56.5685	0.131372	89.4427	0.0673245		372.862	31.9312	38.5649	2.41205	278.694	36.6126	169.452	11.4083
Cell 9	44.7214	0.121816	107.703	0.0782489	44.7214	0.138426	107.703	0.0286602		358.579	43.6805	16.4962	1.29081	272.226	37.6831	118.626	3.39983
Cell 9	56.5685	0.076524	89.4427	0.255857	101.98	0.275133	28.2843	0.0706193		431.64	33.0308	66.3672	16.9805	77.2801	21.2623	366.902	25.9104
Cell 9	44.7214	0.0886626	82.4621	0.170251	82.4621	0.144274	44.7214	0.0522352		460.284	40.81	105.174	17.906	167.902	24.2239	384.263	20.0721
Cell 9	40	0.0826976	80	0.039193	63.2456	0.163027	63.2456	0.0706461		431.465	35.6811	157.801	6.18471	242.12	39.472	318.86	22.5262
Cell 9	44.7214	0.0738819	82.4621	0.0264713	44.7214	0.162997	82.4621	0.064579		432.907	31.984	152.736	4.04311	290.954	47.4246	200.646	12.9575
Cell 9	56.5685	0.0892566	89.4427	0.0208859	28.2843	0.116141	101.98	0.116235		309.065	27.5861	81.1691	1.69529	316.045	36.7058	105.969	12.3173
Cell 9	72.111	0.0760041	72.111	0.21075	100	0.192861	20	0.0783662		437.131	33.2237	146.656	30.9078	152.8	29.4691	443.813	34.7799
Cell 9	63.2456	0.092301	63.2456	0.130957	80	0.151545	40	0.0651093		456.155	42.1036	248.857	32.5897	223.99	33.9445	428.731	27.9144
Cell 9	60	0.0773554	60	0.0725526	60	0.192516	60	0.0835342		453.61	35.0892	300.126	21.7749	258.752	49.814	337.709	28.2102
Cell 9	63.2456	0.0676463	63.2456	0.0532939	40	0.149109	80	0.0487411		414.019	28.0068	202.478	10.7908	270.278	40.3008	288.181	14.0462
Cell 9	72.111	0.0598912	72.111	0.0588052	20	0.155988	100	0.0547736		325.985	19.5237	160.479	9.43699	311.01	48.514	170.377	9.33213
Cell 9	89.4427	0.078121	56.5685	0.131372	101.98	0.139929	28.2843	0.0856382		353.061	27.5815	278.694	36.6126	232.327	32.5094	372.862	31.9312
Cell 9	82.4621	0.120194	44.7214	0.138426	82.4621	0.164303	44.7214	0.121816		289.05	34.742	272.226	37.6831	295.945	48.6246	358.579	43.6805
Cell 9	80	0.0733854	40	0.0958436	63.2456	0.120811	63.2456	0.0996268		373.569	27.4145	291.303	27.9196	321.94	38.8938	304.096	30.2961
Cell 9	82.4621	0.0920613	44.7214	0.104575	44.7214	0.106434	82.4621	0.0928014		328.595	30.2509	297.514	31.1126	356.396	37.9327	255.549	23.7153
Cell 9	89.4427	0.0674305	56.5685	0.0456728	28.2843	0.100888	101.98	0.0992751		249.065	16.7946	246.024	11.2366	387.175	39.0615	171.733	17.0488
Cell 9	107.703	0.152056	44.7214	0.162997	107.703	0.114522	44.7214	0.0738819		177.862	27.0449	290.954	47.4246	251.978	28.8569	432.907	31.984
Cell 9	101.98	0.204872	28.2843	0.116141	89.4427	0.108704	56.5685	0.0892566		148.262	30.3748	316.045	36.7058	326.91	35.5365	309.065	27.5861
Cell 9	100	0.149862	20	0.192533	72.111	0.0729291	72.111	0.0902355		184.629	27.6688	349.407	67.2723	417.691	30.4618	268.766	24.2522
Cell 9	101.98	0.202822	28.2843	0.0706193	56.5685	0.076524	89.4427	0.111632		193.682	39.2829	366.902	25.9104	431.64	33.0308	180.116	20.1067
Cell 9	107.703	0.119472	44.7214	0.0522352	44.7214	0.0886626	107.703	0.0737158		153.321	18.3176	384.263	20.0721	460.284	40.81	122.489	9.02941
Cell 10	101.98	Inf	101.98	Inf	141.421	Inf	28.2843	0.178081		0	7.84718	0	4.18597	0	3.19541	372.239	66.2886
Cell 10	82.4621	0.519415	107.703	Inf	128.062	Inf	44.7214	0.141616		28.7181	14.9166	0	2.61518	0	3.56363	360.032	50.9863
Cell 10	63.2456	0.409027	116.619	Inf	116.619	Inf	63.2456	0.190691		113.08	46.2528	0	11.8278	0	3.4269	294.403	56.1399
Cell 10	44.7214	0.156013	128.062	Inf	107.703	Inf	82.4621	0.0979155		226.765	35.3782	0	2.57392	0	5.95955	301.756	29.5466
Cell 10	28.2843	0.20323	141.421	Inf	101.98	Inf	101.98	0.12193		293.6	59.6684	0	2.6116	0	2.81055	210.949	25.7211
Cell 10	107.703	0.704914	82.4621	0.140416	128.062	Inf	44.7214	0.186835		13.4191	9.4593	50.5314	7.09541	0	2.49945	434.119	81.1086
Cell 10	89.4427	0.234949	89.4427	0.130238	113.137	Inf	56.5685	0.140093		73.5577	17.2823	35.2127	4.58604	0	3.72749	403.833	56.5743
Cell 10	72.111	0.185079	100	3.53884	100	Inf	72.111	0.174518		189.706	35.1105	2.00159	7.0833	0	3.94248	358.377	62.5434
Cell 10	56.5685	0.179051	113.137	0.403151	89.4427	Inf	89.4427	0.146478		248.006	44.4059	13.1394	5.29717	0	5.71475	330.139	48.3583
Cell 10	44.7214	0.292854	128.062	0.821748	82.4621	Inf	107.703	0.133455		307.881	90.164	5.88593	4.83675	0	7.13314	242.769	32.3987
Cell 10	116.619	0.42617	63.2456	0.0901719	116.619	Inf	63.2456	0.141045		20.5075	8.7397	150.931	13.6097	0	3.90099	442.782	62.4522
Cell 10	100	0.465145	72.111	0.233501	100	Inf	72.111	0.135009		67.7685	31.5222	124.068	28.9699	0	3.69908	407.144	54.968
Cell 10	84.8528	0.10925	84.8528	0.0846332	84.8528	Inf	84.8528	0.134632		186.35	20.3587	89.3676	7.56346	0	8.80453	341.465	45.9722
Cell 10	72.111	0.168272	100	0.173803	72.111	Inf	100	0.158912		256.471	43.1571	53.7354	9.3394	0	11.83	252.702	40.1573
Cell 10	63.2456	0.170686	116.619	0.119391	63.2456	0.798379	116.619	0.219668		285.071	48.6577	50.1343	5.98559	18.0531	14.4132	124.424	27.332
Cell 10	128.062	0.112302	44.7214	0.0711806	107.703	Inf	82.4621	0.14749		37.8715	4.25304	263.918	18.7859	0	3.51781	364.7	53.7897
Cell 10	113.137	0.0803234	56.5685	0.0802698	89.4427	Inf	89.4427	0.12113		144.223	11.5845	249.533	20.03	0	4.34885	317.222	38.425
Cell 10	100	0.0913466	72.111	0.0866285	72.111	Inf	100	0.17018		224.943	20.5478	207.792	18.0007	0	6.87347	266.73	45.3923
Cell 10	89.4427	0.11296	89.4427	0.142769	56.5685	Inf	113.137	0.109123		256.577	28.983	129.785	18.5294	0	16.426	193.551	21.1209
Cell 10	82.4621	0.176418	107.703	0.164125	44.7214	0.430159	128.062	0.232433		252.275	44.506	87.4864	14.3587	55.9048	24.0479	99.8627	23.2114
Cell 10	141.421	0.164682	28.2843	0.0890637	101.98	Inf	101.98	0.151648		33.1955	5.46671	339.728	30.2574	0	2.65501	284.498	43.1437
Cell 10	128.062	0.0870584	44.7214	0.0895016	82.4621	Inf	107.703	0.241676		152.669	13.2911	318.677	28.5221	0	6.60166	178.737	43.1963
Cell 10	116.619	0.0561972	63.2456	0.094683	63.2456	2.40401	116.619	0.219521		262.62	14.7585	294.379	27.8727	14.9465	35.9316	119.106	26.1462
Cell 10	107.703	0.129605	82.4621	0.145063	44.7214	0.635095	128.062	0.213994		256.201	33.2049	214.505	31.1168	45.281	28.7578	99.9128	21.3807
Cell 10	101.98	0.157723	101.98	0.111954	28.2843	0.31523	141.421	0.319984		212.929	33.5837	154.169	17.2598	149.891	47.2501	56.8721	18.1982
Cell 11	44.7214	0.082759	107.703	0.0971697	107.703	Inf	44.7214	0.096599		252.808	20.9222	113.12	10.9918	0	2.50253	302.131	29.1856
Cell 11	28.2843	0.127471	101.98	0.060887	89.4427	0.128863	56.5685	0.117088		303.126	38.6399	198.71	12.0989	50.5552	6.51467	242.906	28.4413
Cell 11	20	0.122597	100	0.0418967	72.111	0.0883256	72.111	0.123512		334.907	41.0585	246.169	10.3137	125.859	11.1166	145.445	17.9642
Cell 11	28.2843	0.0964956	101.98	0.0226377	56.5685	0.114803	89.4427	0.216816		340.967	32.9018	156.672	3.54669	234.983	26.9767	53.1843	11.5312
Cell 11	44.7214	0.0716593	107.703	0.0383668	44.7214	0.0975191	107.703	Inf		290.481	20.8156	45.9726	1.76382	354.065	34.5281	0	6.44003
Cell 11	56.5685	0.074802	89.4427	0.0722741	101.98	0.102626	28.2843	0.13205		221.879	16.597	192.288	13.8974	27.3458	2.80638	272.28	35.9545
Cell 11	44.7214	0.129486	82.4621	0.0578728	82.4621	0.057262	44.7214	0.106385		278.664	36.0832	279.133	16.1542	110.094	6.3042	245.934	26.1637
Cell 11	40	0.131495	80	0.0479942	63.2456	0.0419612	63.2456	0.124707		287.881	37.8549	310.013	14.8788	150.929	6.33318	174.027	21.7025
Cell 11	44.7214	0.0995039	82.4621	0.0301809	44.7214	0.0881872	82.4621	0.318155		285.51	28.4094	281.861	8.50682	259.186	22.8569	66.7927	21.2504
Cell 11	56.5685	0.123195	89.4427	0.02328	28.2843	0.108145	101.98	0.563837		243.638	30.0151	157.039	3.65588	339.785	36.7462	12.8973	7.27197
Cell 11	72.111	0.0609996	72.111	0.0900228	100	0.066152	20	0.125093		215.217	13.1281	240.487	21.6494	45.9617	3.04046	320.14	40.0473
Cell 11	63.2456	0.0994257	63.2456	0.0883497	80	0.0339008	40	0.0856262		305.298	30.3545	320.972	28.3578	137.38	4.65731	283.338	24.2611
Cell 11	60	0.0634789	60	0.0590523	60	0.0456221	60	0.0945679		322.879	20.496	385.956	22.7916	259.944	11.8592	238.853	22.5878
Cell 11	63.2456	0.0716981	63.2456	0.0499403	40	0.0931722	80	0.237603		288.978	20.7191	344.996	17.2292	293.018	27.3011	75.5281	17.9457
Cell 11	72.111	0.168612	72.111	0.0619469	20	0.0814976	100	0.298111		187.015	31.5331	260.496	16.137	344.774	28.0983	32.4143	9.66308
Cell 11	89.4427	0.0383272	56.5685	0.114803	101.98	0.142724	28.2843	0.0964956		205.534	7.87755	234.983	26.9767	30.2988	4.32435	340.967	32.9018
Cell 11	82.4621	0.0417459	44.7214	0.0975191	82.4621	0.0468136	44.7214	0.0716593		262.418	10.9549	354.065	34.5281	129.419	6.05858	290.481	20.8156
Cell 11	80	0.0663526	40	0.0881474	63.2456	0.0738872	63.2456	0.124336		262.252	17.4011	368.783	32.5073	191.98	14.1849	237.141	29.4852
Cell 11	82.4621	0.170066	44.7214	0.096599	44.7214	0.082759	82.4621	0.386879		185.452	31.539	302.131	29.1856	252.808	20.9222	66.8911	25.8788
Cell 11	89.4427	0.261761	56.5685	0.117088	28.2843	0.127471	101.98	0.635595		104.325	27.3082	242.906	28.4413	303.126	38.6399	31.0077	19.7084
Cell 11	107.703	0.0949216	44.7214	0.0881872	107.703	3.01561	44.7214	0.0995039		63.2779	6.00643	259.186	22.8569	1.10666	3.33726	285.51	28.4094
Cell 11	101.98	0.0655436	28.2843	0.108145	89.4427	0.129113	56.5685	0.123195		149.013	9.76683	339.785	36.7462	55.8973	7.21705	243.638	30.0151
Cell 11	100	0.122062	20	0.104796	72.111	0.0712282	72.111	0.152134		148.887	18.1734	346.802	36.3433	159.372	11.3518	185.001	28.145
Cell 11	101.98	0.161787	28.2843	0.13205	56.5685	0.074802	89.4427	0.279226		150.354	24.3254	272.28	35.9545	221.879	16.597	77.0253	21.5074
Cell 11	107.703	0.339918	44.7214	0.106385	44.7214	0.129486	107.703	Inf		70.3589	23.9163	245.934	26.1637	278.664	36.0832	0	20.242
Cell 12	44.7214	0.223796	107.703	Inf	107.703	0.232021	44.7214	0.154335		244.293	54.6718	0	1.01938	26.2651	6.09407	260.99	40.2799
Cell 12	28.2843	0.166564	101.98	Inf	89.4427	0.0589429	56.5685	0.126841		393.771	65.588	0	1.63171	105.488	6.21777	229.43	29.101
Cell 12	20	0.173008	100	Inf	72.111	0.122301	72.111	0.132778		405.37	70.132	0	0.446809	152.626	18.6664	172.047	22.8441
Cell 12	28.2843	0.164115	101.98	Inf	56.5685	0.175731	89.4427	0.086614		375.548	61.6332	0	2.03732	146.44	25.7341	53.5382	4.63716
Cell 12	44.7214	0.134039	107.703	0.184367	44.7214	0.26228	107.703	Inf		401.502	53.8167	6.85512	1.26386	146.982	38.5506	0	2.15367
Cell 12	56.5685	0.311985	89.4427	Inf	101.98	0.304315	28.2843	0.124045		173.04	53.9858	0	10.8059	29.3415	8.92906	402.151	49.8848
Cell 12	44.7214	0.227233	82.4621	0.349674	82.4621	0.148998	44.7214	0.0863462		297.488	67.5992	7.1779	2.50993	119.668	17.8302	402.628	34.7654
Cell 12	40	0.246343	80	0.212723	63.2456	0.111168	63.2456	0.0802731		341.27	84.0693	29.2161	6.21494	222.377	24.7213	312.001	25.0453
Cell 12	44.7214	0.212213	82.4621	0.339575	44.7214	0.177881	82.4621	0.0484504		317.007	67.2731	24.8741	8.44663	227.749	40.5122	175.721	8.51378
Cell 12	56.5685	0.186069	89.4427	0.170351	28.2843	0.196675	101.98	0.0475649		270.263	50.2875	48.8767	8.32619	304.636	59.9141	83.1337	3.95425
Cell 12	72.111	0.538741	72.111	2.36878	100	0.997648	20	0.125066		68.7666	37.0474	9.04879	21.4346	17.3311	17.2903	451.706	56.4933
Cell 12	63.2456	0.30442	63.2456	0.482716	80	0.391363	40	0.115282		157.956	48.0851	43.4746	20.9859	69.7431	27.2948	439.16	50.6272
Cell 12	60	0.28883	60	0.25333	60	0.206435	60	0.101346		205.203	59.2686	84.0826	21.3007	183.326	37.8449	390.727	39.5987
Cell 12	63.2456	0.149353	63.2456	0.179059	40	0.20543	80	0.105665		290.195	43.3416	106.013	18.9825	272.039	55.885	251.705	26.5964
Cell 12	72.111	0.170028	72.111	0.183161	20	0.154106	100	0.0801681		290.51	49.3947	96.5851	17.6906	352.207	54.277	122.298	9.80443
Cell 12	89.4427	Inf	56.5685	0.175731	101.98	Inf	28.2843	0.164115		0	31.2224	146.44	25.7341	0	16.825	375.548	61.6332
Cell 12	82.4621	3.3649	44.7214	0.26228	82.4621	2.18538	44.7214	0.134039		14.3711	48.3574	146.982	38.5506	11.9884	26.1993	401.502	53.8167
Cell 12	80	0.476124	40	0.217045	63.2456	0.475068	63.2456	0.139383		98.3378	46.821	203.418	44.1509	108.28	51.4403	315.736	44.0083
Cell 12	82.4621	0.274546	44.7214	0.154335	44.7214	0.223796	82.4621	0.146031		159.08	43.6748	260.99	40.2799	244.293	54.6718	236.419	34.5244
Cell 12	89.4427	0.193394	56.5685	0.126841	28.2843	0.166564	101.98	0.196213		208.13	40.251	229.43	29.101	393.771	65.588	122.243	23.9857
Cell 12	107.703	Inf	44.7214	0.177881	107.703	Inf	44.7214	0.212213		0	28.04	227.749	40.5122	0	9.30781	317.007	67.2731
Cell 12	101.98	Inf	28.2843	0.196675	89.4427	3.2115	56.5685	0.186069		0	28.1356	304.636	59.9141	6.84601	21.986	270.263	50.2875
Cell 12	100	2.72153	20	0.183212	72.111	0.420061	72.111	0.258579		11.5636	31.4706	344.001	63.025	77.8488	32.7012	207.671	53.6992
Cell 12	101.98	0.695427	28.2843	0.124045	56.5685	0.311985	89.4427	0.30426		49.8191	34.6455	402.151	49.8848	173.04	53.9858	133.559	40.6368
Cell 12	107.703	0.262762	44.7214	0.0863462	44.7214	0.227233	107.703	0.85263		105.397	27.6944	402.628	34.7654	297.488	67.5992	24.4337	20.8329
Cell 13	44.7214	0.0767573	107.703	0.0481045	107.703	0.0783931	44.7214	0.0964019		384.391	29.5048	105.476	5.07388	252.491	19.7936	288.238	27.7867
Cell 13	28.2843	0.0788136	101.98	0.0502166	89.4427	0.0643675	56.5685	0.0582433		346.101	27.2774	116.444	5.84745	277.36	17.8529	288.609	16.8096
Cell 13	20	0.0907215	100	0.039611	72.111	0.0608185	72.111	0.0514396		276.493	25.0838	133.354	5.2823	319.105	19.4075	229.335	11.7969
Cell 13	28.2843	0.138746	101.98	0.0414929	56.5685	0.0602011	89.4427	0.0507453		207.447	28.7825	104.199	4.32352	288.378	17.3607	66.2163	3.36017
Cell 13	44.7214	0.234021	107.703	0.0305078	44.7214	0.0693352	107.703	0.574846		117.256	27.4404	82.5048	2.51704	283.438	19.6523	2.40911	1.38487
Cell 13	56.5685	0.0745639	89.4427	0.0602232	101.98	0.116484	28.2843	0.109176		332.446	24.7884	219.664	13.2288	271.808	31.6612	222.789	24.3232
Cell 13	44.7214	0.068959	82.4621	0.0477349	82.4621	0.0973125	44.7214	0.0838097		259.838	17.9182	226.389	10.8066	341.524	33.2346	225.082	18.864
Cell 13	40	0.152229	80	0.0566263	63.2456	0.118978	63.2456	0.114628		202.776	30.8686	249.547	14.1309	328.868	39.128	149.343	17.1189
Cell 13	44.7214	0.197953	82.4621	0.0366834	44.7214	0.0873037	82.4621	0.138382		138.789	27.4737	223.882	8.21275	338.222	29.528	71.3659	9.87579
Cell 13	56.5685	0.50152	89.4427	0.0284249	28.2843	0.0633695	101.98	0.45978		47.0728	23.6079	175.967	5.00184	344.188	21.811	6.66307	3.06355
Cell 13	72.111	0.123305	72.111	0.0717743	100	0.137632	20	0.117766		288.495	35.5728	298.92	21.4547	276.563	38.064	225.533	26.5602
Cell 13	63.2456	0.135986	63.2456	0.0409564	80	0.113997	40	0.108934		223.909	30.4485	315.254	12.9117	347.354	39.5974	164.535	17.9234
Cell 13	60	0.269451	60	0.0617998	60	0.0644276	60	0.120857		131.522	35.4388	269.162	16.6342	397.397	25.6034	115.777	13.9924
Cell 13	63.2456	0.642818	63.2456	0.0602933	40	0.0808255	80	0.147439		41.6197	26.7539	273.994	16.52	382.891	30.9473	46.8768	6.91145
Cell 13	72.111	Inf	72.111	0.0371441	20	0.0910766	100	Inf		0	20.5276	262.206	9.73939	322.378	29.3611	0	4.28992
Cell 13	89.4427	0.210099	56.5685	0.0602011	101.98	0.135359	28.2843	0.138746		215.058	45.1835	288.378	17.3607	271.777	36.7875	207.447	28.7825
Cell 13	82.4621	0.14628	44.7214	0.0693352	82.4621	0.0975987	44.7214	0.234021		166.907	24.4152	283.438	19.6523	384.304	37.5076	117.256	27.4404
Cell 13	80	0.306312	40	0.0696555	63.2456	0.113409	63.2456	0.382159		77.0947	23.615	254.919	17.7565	406.253	46.0726	49.9709	19.0968
Cell 13	82.4621	3.81176	44.7214	0.0964019	44.7214	0.0767573	82.4621	3.32815		6.7255	25.636	288.238	27.7867	384.391	29.5048	2.20047	7.32349
Cell 13	89.4427	Inf	56.5685	0.0582433	28.2843	0.0788136	101.98	Inf		0	23.6825	288.609	16.8096	346.101	27.2774	0	2.54452
Cell 13	107.703	0.308826	44.7214	0.0873037	107.703	0.145567	44.7214	0.197953		122.567	37.8519	338.222	29.528	263.858	38.409	138.789	27.4737
Cell 13	101.98	0.399468	28.2843	0.0633695	89.4427	0.115171	56.5685	0.50152		69.514	27.7686	344.188	21.811	360.196	41.4842	47.0728	23.6079
Cell 13	100	0.463022	20	0.102206	72.111	0.0885424	72.111	2.70968		41.986	19.4404	258.518	26.4222	409.404	36.2496	6.09268	16.5092
Cell 13	101.98	Inf	28.2843	0.109176	56.5685	0.0745639	89.4427	Inf		0	13.3714	222.789	24.3232	332.446	24.7884	0	8.43629
Cell 13	107.703	Inf	44.7214	0.0838097	44.7214	0.068959	107.703	Inf		0	9.86232	225.082	18.864	259.838	17.9182	0	4.42725
Cell 14	101.98	0.0337938	101.98	0.00696601	141.421	Inf	28.2843	0.0188341		141.255	4.77352	6.99279	0.0487118	0	-0.50744	267.965	5.04687
Cell 14	82.4621	0.0696785	107.703	Inf	128.062	Inf	44.7214	0.00464921		243.079	16.9374	0	-3.33672	0	-5.6677	205.096	0.953537
Cell 14	63.2456	0.264466	116.619	Inf	116.619	Inf	63.2456	0.0100241		275.89	72.9634	0	1.57621	0	-3.16295	131.259	1.31575
Cell 14	44.7214	0.306198	128.062	Inf	107.703	Inf	82.4621	-0.00892939		298.019	91.2527	0	0.669	0	0.249717	58.6052	-0.523309
Cell 14	28.2843	0.223733	141.421	-1.5353	101.98	0.0109439	101.98	0.257163		333.527	74.6212	6.18103	-9.48973	20.7258	0.226822	2.76267	0.710455
Cell 14	107.703	0.0361434	82.4621	0.0145412	128.062	Inf	44.7214	0.141283		192.215	6.94731	74.9829	1.09034	0	0.741962	176.244	24.9003
Cell 14	89.4427	0.134592	89.4427	-0.0338013	113.137	Inf	56.5685	0.0522906		271.408	36.5293	65.006	-2.19729	0	-3.5368	122.925	6.42783
Cell 14	72.111	0.284019	100	0.0040393	100	Inf	72.111	-0.0342392		330.94	93.9932	79.0771	0.319416	0	-2.52071	60.1939	-2.06099
Cell 14	56.5685	0.313519	113.137	-0.0526958	89.4427	-0.050019	89.4427	0.147888		329.924	103.437	62.5532	-3.2963	36.7429	-1.83784	32.5192	4.80918
Cell 14	44.7214	0.34388	128.062	0.0475673	82.4621	-0.00719956	107.703	0.255324		322.917	111.045	29.5612	1.40615	76.8673	-0.553411	1.91523	0.489006
Cell 14	116.619	0.043937	63.2456	-0.00133324	116.619	Inf	63.2456	0.269158		155.405	6.82802	202.637	-0.270163	0	-0.467268	152.94	41.1649
Cell 14	100	0.0973718	72.111	0.00132478	100	Inf	72.111	0.469987		287.74	28.0178	239.227	0.316924	0	-1.64834	48.9765	23.0183
Cell 14	84.8528	0.275765	84.8528	0.00901953	84.8528	0.247751	84.8528	Inf		352.793	97.288	207.501	1.87156	6.28232	1.55645	0	0.320602
Cell 14	72.111	0.243353	100	-0.00592509	72.111	-0.0352164	100	Inf		367.429	89.415	128.167	-0.759403	84.8161	-2.98692	0	-0.804418
Cell 14	63.2456	0.299289	116.619	-0.0307301	63.2456	-0.0419425	116.619	Inf		379.342	113.533	52.5056	-1.6135	157.402	-6.60183	0	-1.12108
Cell 14	128.062	0.0159704	44.7214	0.00329078	107.703	Inf	82.4621	0.320566		165.519	2.6434	345.18	1.13591	0	2.44943	140.412	45.0114
Cell 14	113.137	0.0804341	56.5685	-0.00724937	89.4427	-0.179645	89.4427	0.814649		294.014	23.6488	358.348	-2.5978	14.6565	-2.63297	32.6877	26.629
Cell 14	100	0.108117	72.111	0.000648129	72.111	-0.0139838	100	Inf		372.04	40.2237	283.571	0.183791	66.0199	-0.923211	0	6.8206
Cell 14	89.4427	0.169424	89.4427	-0.00949761	56.5685	0.00622503	113.137	Inf		420.318	71.212	165.143	-1.56847	160.921	1.00174	0	1.22472
Cell 14	82.4621	0.176224	107.703	-0.12431	44.7214	0.00650989	128.062	Inf		403.197	71.0532	49.9367	-6.20762	242.418	1.57811	0	0.997848
Cell 14	141.421	0.0238634	28.2843	-0.000824484	101.98	Inf	101.98	0.807808		191.378	4.56693	338.384	-0.278992	0	0.492495	74.2952	60.0162
Cell 14	128.062	0.0206769	44.7214	0.000630887	82.4621	0.0687172	107.703	Inf		311.436	6.43952	340.388	0.214746	47.0347	3.23209	0	18.1281
Cell 14	116.619	0.0551441	63.2456	0.00447114	63.2456	0.0248519	116.619	Inf		353.668	19.5027	214.116	0.957342	111.853	2.77975	0	6.81766
Cell 14	107.703	0.111259	82.4621	-0.0285239	44.7214	0.0182499	128.062	Inf		356.448	39.658	91.7765	-2.61782	196.099	3.57879	0	1.77794
Cell 14	101.98	0.131279	101.98	0.218198	28.2843	0.0248514	141.421	Inf		328.929	43.1816	27.0632	5.90514	325.919	8.09954	0	-1.08619
Cell 15	101.98	Inf	101.98	0.0629307	141.421	Inf	28.2843	0.075867		0	3.59465	78.0766	4.91342	0	2.84452	376.662	28.5762
Cell 15	82.4621	0.388354	107.703	0.0296857	128.062	Inf	44.7214	0.0997102		24.2787	9.42874	129.52	3.84489	0	1.00848	315.48	31.4566
Cell 15	63.2456	0.103482	116.619	0.0291177	116.619	Inf	63.2456	0.0959384		123.724	12.8032	122.154	3.55685	0	2.45181	302.301	29.0023
Cell 15	44.7214	0.0900759	128.062	0.0953151	107.703	0.15829	82.4621	0.125057		240.318	21.6469	48.1181	4.58638	16.1526	2.55678	209.787	26.2353
Cell 15	28.2843	0.0934651	141.421	Inf	101.98	0.0551208	101.98	0.267151		318.737	29.7908	0	2.04958	49.723	2.74077	102.397	27.3554
Cell 15	107.703	Inf	82.4621	0.0415739	128.062	Inf	44.7214	0.101487		0	3.41388	204.775	8.51331	0	3.75137	306.184	31.0737
Cell 15	89.4427	0.210674	89.4427	0.0328368	113.137	0.283827	56.5685	0.166491		50.4099	10.62	283.503	9.30932	4.46382	1.26695	220.176	36.6572
Cell 15	72.111	0.0996194	100	0.0336379	100	0.0716512	72.111	0.120589		161.85	16.1234	209.166	7.03592	21.7923	1.56144	211.428	25.4959
Cell 15	56.5685	0.145475	113.137	0.0478632	89.4427	0.0365784	89.4427	0.143967		217.658	31.6639	104.012	4.97832	41.829	1.53003	171.716	24.7216
Cell 15	44.7214	0.145386	128.062	0.0335523	82.4621	0.0316947	107.703	0.363918		217.502	31.6217	0.884484	0.0296765	98.8218	3.13213	86.4195	31.4496
Cell 15	116.619	Inf	63.2456	0.0421455	116.619	Inf	63.2456	0.110845		0	4.01965	274.913	11.5864	0	2.62076	247.097	27.3896
Cell 15	100	0.0838101	72.111	0.0327655	100	0.0601194	72.111	0.0914886		59.5429	4.9903	326.593	10.701	31.5433	1.89637	242.257	22.1637
Cell 15	84.8528	0.134866	84.8528	0.0325081	84.8528	0.0531205	84.8528	0.188899		132.156	17.8234	305.817	9.94152	79.0245	4.19782	150.541	28.437
Cell 15	72.111	0.225091	100	0.0552091	72.111	0.044891	100	0.171901		168.711	37.9752	148.243	8.18434	128.439	5.76576	158.225	27.1989
Cell 15	63.2456	0.395059	116.619	0.121996	63.2456	0.0605956	116.619	0.602798		105.302	41.6005	36.0027	4.39219	164.308	9.95635	40.9726	24.6982
Cell 15	128.062	Inf	44.7214	0.0533512	107.703	Inf	82.4621	0.126275		0	1.08664	283.742	15.138	0	2.90153	243.238	30.7148
Cell 15	113.137	0.321686	56.5685	0.0379677	89.4427	0.0859091	89.4427	0.15316		21.2146	6.82444	333.538	12.6637	48.6354	4.17822	154.23	23.6218
Cell 15	100	0.280037	72.111	0.0534607	72.111	0.0317399	100	0.216708		64.4667	18.0531	320.168	17.1164	129.646	4.11496	124.306	26.9381
Cell 15	89.4427	0.717476	89.4427	0.0779914	56.5685	0.0486156	113.137	0.148295		47.1412	33.8227	193.657	15.1036	203.173	9.87737	128.578	19.0675
Cell 15	82.4621	0.677371	107.703	0.10494	44.7214	0.0542411	128.062	0.308722		54.0713	36.6263	87.2238	9.15329	226.124	12.2652	57.0066	17.5992
Cell 15	141.421	Inf	28.2843	0.068359	101.98	Inf	101.98	0.0905111		0	4.70798	331.302	22.6474	0	2.50878	211.847	19.1745
Cell 15	128.062	Inf	44.7214	0.0511544	82.4621	0.357425	107.703	0.209123		0	6.97635	396.115	20.263	17.6316	6.30199	115.085	24.0669
Cell 15	116.619	1.17628	63.2456	0.0575456	63.2456	0.0751153	116.619	0.237194		15.1481	17.8185	409.034	23.5381	115.542	8.67901	110.7	26.2575
Cell 15	107.703	1.20339	82.4621	0.0605125	44.7214	0.0488752	128.062	0.177839		23.1471	27.8549	277.89	16.8158	267.267	13.0627	93.8706	16.6939
Cell 15	101.98	0.344195	101.98	0.103394	28.2843	0.0557018	141.421	0.219512		78.9102	27.1605	128.61	13.2975	282.637	15.7434	59.6891	13.1025
