# Supplementary material for: Spatially displaced excitation contributes to the encoding of interrupted motion by a retinal direction-selective circuit
Source: eLife. 2021 Jun 7;10:e68181. doi: 10.7554/eLife.68181 (PMC8211448; doi:10.7554/eLife.68181)
Supplement: Figure 4—figure supplement 1—source data 1. [file elife-68181-fig4-figsupp1-data1.xlsx]

## Sheet: B
	Cell 1 On			Cell 2 On			Cell 3 On
	distance from soma	Ribbons/dendritic length		distance from soma	Ribbons/dendritic length		distance from soma	Ribbons/dendritic length
	35	0.228		75	0.221		15	0.199
	25	0.161		65	0.177		5	0.336
	15	0.392		55	0.157		-5	0.209
	5	0.105		45	0.217		-15	0.145
	-5	0.278		35	0.24		-25	0.211
	-15	0.259		25	0.129		-35	0.217
	-25	0.266		15	0.133		-45	0.152
	-35	0.162		5	0.049		-55	0.206
	-45	0.213		-5	0.106		-65	0.153
	-55	0.317		-15	0.205		-75	0.153
	-65	0.231		-25	0.28		-85	0.148
	-75	0.158		-35	0.142		-95	0.174
	-85	0.197		-45	0.184		-105	0.197
	-95	0.188		-55	0.085		-115	0.214
	-105	0.295		-65	0.219		-125	0.148
	-115	0.224		-75	0.124		-135	0.19
				-85	0.062		-145	0.117
				-95	0.072		-155	0.175
				-105	0.103		-165	0.159
				-115	0.252		-175	0.4

## Sheet: D
	Latency					Rise Time					Decay Time
Distance from soma	-60	0	60	120		-60	0	60	120		-60	0	60	120
	92.1	103	90.8			34.6	26	44.5			49	84.9	43.2
	78.3	72	64.5	63.7		76.9	62.1	65.6	63.3		171.5	237.7	273.1	203.8
	90.2	72.1	66.1	75.3		142	171.7	99.9	108.9		350.7	298.2	371.5	253.1
		71.9	57.2	56.9			24	42.5	73.9			243.6	295.5	252.8
	83.3	73.2	76.1	97.8		54.6	54.7	62	45.9		65.1	121.7	102.1	101.9
	78.4	69.5	77.9	69.1		42.4	56	53.1	44.1		84.2	219.4	82.2	64.2
	75.2	72.9	78.3	92		31.1	58.1	53.8	55.6		156.8	95.3	64.3	38.1
	72.7	59.8	62	66.1		48.9	55.9	63	62.2		121.8	252.9	238.6	145.3
	56.8	59.2	60.9			58.8	56.3	69.8			149.4	176	128.2
Mean	78.4	72.6	70.4	74.4		61.2	62.7	61.6	64.9		143.6	192.2	177.6	151.3
Std error	3.9	4.2	3.7	5.7		12.6	14.4	5.7	8.3		33.5	25.4	39.5	33.2
