# Supplementary material for: Spatially displaced excitation contributes to the encoding of interrupted motion by a retinal direction-selective circuit
Source: eLife. 2021 Jun 7;10:e68181. doi: 10.7554/eLife.68181 (PMC8211448; doi:10.7554/eLife.68181)
Supplement: Figure 4—source data 1. [file elife-68181-fig4-data1.xlsx]

## Sheet: 4F
	Cell 1 (Left)					Cell 2 (Middle)					Cell 3 (Right)
	Location	Ribbons/dendritic length				Location	Ribbons/dendritic length				Location	Ribbons/dendritic length
	80	0.221				40	0.228				20	0.199
	60	0.162				20	0.243				0	0.246
	40	0.225				0	0.219				-20	0.177
	20	0.13				-20	0.261				-40	0.19
	0	0.077				-40	0.184				-60	0.177
	-20	0.237				-60	0.264				-80	0.15
	-40	0.16				-80	0.175				-100	0.185
	-60	0.139				-100	0.242				-120	0.177
	-80	0.103				-120	0.224				-140	0.17
	-100	0.096									-160	0.166
	-120	0.252									-180	0.4

## Sheet: 4G
	Latency (ms)	Max-Opp axis													Latency (ms)	Pref-Null axis
Distance from soma	-80	-60	-40	-20	0	20	40	60	80	100	120	140			-80	-60	-40	-20	0	20	40	60	80	100	120	140
	70.3	65.1	59.1	56	65.7	62.4	57.8	62.4	58.7	63.9					70.3	65.1	59.1	56	65.7	62.4	57.8	62.4	58.7	63.9
	77.8	67.2	66.1	66.8	66.4	62.7	52.6	61.4	56.5	59.6					66.1	68.1	63.7	67.8	69	53.5	59.8	60.5	61.5	61.2	63.7	84.9
			68.8	67.4	56	60.3	50.2	59.9	68.6	79.2							68.8	67.4	56	60.3	50.2	59.9	68.6	79.2
	71.4		44.3	96.5	77	60	72.1	79.7	67.6						71.4		44.3	96.5	77	60	72.1	79.7	67.6
			81.3	97	85.7	95.6	101.7		86.5	98.4					98.5	92.3	88.3	89.3	89.4	97
				97	94.3	80.1	102.5	95.1	93.5	92.9						60.6	56.6	65.8	68.7	65.6	64.3	59.6	67.6	62.9
			61.6	64.7	66.6	62.8	63.6	73.3	67.2	56.7	73.8	66.8					99.3	90.4	84.7	91.4	86.2	82.4	71.2	71.2	76.7	84
			99.3	90.4	84.7	91	86.2	82.4	70	82.3	76.9	84			96.2	84.5	63.6	75	67	64.2	64.9	65.4	64	66.3	61.1
	96.2	84.5	63.6	76.8	67	62.8	64.9	65.4	65	66.3	60.7					74.6	70.3	79.9	62.7	68.6	67.6	70	75.1	88.4
		98	74.2	70.8	67.8	65.1	71.5	71.8	70.9	75.7	76.8				79.2	76.3	60.3	64	64.8	64.8	48.8	61.8	59.2	66.6
		67.3	64.3	58.8	66.7	61.3	56	57.3	58.4	58.4					88.6	78.1	74.6	81.1	80.3	74.7	84.9	70	68.1	82.3
	87.3	66.8	81.3	74.7	79	80.9	90.3	85.4	86.8	90.6	91.7	90.9				79.8	81.2	70.7	86.9	79.9	72.7	64	72.1	80.4
		79.8	81.2	70.7	86.9	79.9	72.7	64	72.1	80.4						87.7	84.8	80.3	67.5	74.6	81.4	76.8	79.3	75
		87.4	92.4	81.1	72.6	73.5	74.2	74.1	59.5	67.4	66.3	76.8								111.5	67.7	71.3	76.6	95.6	119.3
		64.3	70.7	67.3	67.2	70	75.1	74.2	76.3	75.8	84	97.1			98.1	104.1	85.6	68.3	66.9	68	66.1	62.3	68	80.5	69
	70.8	63.7	57.9	57.4	66.5	62.5	66.2	67	71.2	71.2
mean	79	74.4	71.1	74.6	73.1	70.7	72.3	71.6	70.5	74.6	75.8	83.1		mean	83.6	79.2	71.5	75.2	71.9	73.1	67.5	67.6	68.4	74.9	78	84.5
Std error	4.3	3.8	3.7	3.5	2.6	2.9	4	2.7	2.7	3.3	3.9	5.3		std error	4.8	3.8	4	3.1	2.7	4.1	3.1	2	1.7	2.9	10.7	0.4

## Sheet: 4H
	Rise Time (ms)	Max-Opp axis													Rise Time (ms)	Pref-Null axis
Distance from Soma	-80	-60	-40	-20	0	20	40	60	80	100	120	140				-80	-60	-40	-20	0	20	40	60	80	100	120	140
	66.3	78.6	46.1	57.1	53.9	76.7	43.2	93.4	54.1	63.8						66.3	78.6	46.1	57.1	53.9	76.7	43.2	93.4	54.1	63.8
	81.3	60.1	78.8	71.1	49	64.5	73.4	69.8	61.3	57.7						93.7	65	60.1	57.2	75.3	63.1	67.8	71.3	59.6	59.3	63.8	70.5
			64.6	53.6	76.2	70.6	66.9	63.8	49.7	68.7								64.6	53.6	76.2	70.6	66.9	63.8	49.7	68.7
	176.9		126.1	130.3	67	118.9	184.3	186.5	29.6							176.9		126.1	130.3	67	118.9	184.3	186.5	29.6
			67.1	44.1	52.7	60.2	75.7		83.9	52.7						60.6	58.6	70.8	69.5	64	57.9
				57.9	72.6	77.5	73.1	77.4	61	56.5							39.9	36.5	37.2	39.5	48	53.9	72.8	42.4	50
			38.6	40.6	43	45.6	52.2	67.1	43.6	49.3	45.5	70						57.9	49.8	59.4	62.2	60.2	62.7	57.4	48.2	48	47.2
			57.9	49.8	59.4	61.9	60.2	62.7	55.4	48.2	47.6	47.2				75.7	67.8	87.6	82.2	59.3	59.5	61.3	70.7	61.6	61.5	53.9
	75.7	67.8	87.6	81.8	59.3	60.1	61.3	70.7	60.2	61.5	52.3					44.6	52	38.2	47.2	58.9	52.9	62.1	63.8	56.7	46.4
		49.8	51.2	46.4	50.3	58.2	58	57.4	48.4	49.2	47					37.5	45.1	44.2	41.8	46.3	52.6	50.4	49.5	43.1	47.9
		44.3	34.7	45.9	55	44.1	42.8	42.8	42	38.2						44.7	65.2	46.6	42.2	40.8	42.6	40.9	53	50.4	41.3
	59.6	79.5	45.6	44.2	44	40.6	43.6	48.6	45.6	40.8	50.9	45.8					68	55.6	49.8	52.1	50.3	51.9	51.3	57.2	52.7
		68	55.6	49.8	52.1	50.3	51.9	51.3	57.2	52.7							56.4	62.2	58.6	60.3	73.2	81.7	56.8	52.5	73.7
		67.3	59.3	61	60.8	69.5	83.8	56.2	62.9	57.5	61.5	67.3									102.5	47.7	70.1	91.7	143.6	132.6
		45.1	49.7	48.5	52.7	59.5	62.7	60.3	63.7	63.3	62.2	67				54.9	61.3	59.9	52.3	56.8	53	61.7	65.8	63.8	63.7	53.1
	41.5	38.4	39.7	39.9	46.7	43.2	47.6	47.9	44.5	44.2
Mean	83.6	59.9	60.2	57.6	55.9	62.6	67.5	70.4	53.9	53.6	52.4	59.4			Mean	72.8	59.8	61.2	59.2	57.8	65.6	66.7	73.7	55	63.1	70.3	58.8
Std error	19.5	4.6	6	5.6	2.4	4.7	8.4	8.9	3.1	2.3	2.6	5.3			std error	14.2	3.3	6.2	6.3	3	5.4	9.5	9.2	3.7	7.2	15.8	11.7

## Sheet: 4I
	Decay Time (ms)	Max-Opp axis												Decay Time (ms)	Pref-Null axis
Distance from soma	-80	-60	-40	-20	0	20	40	60	80	100	120	140			-80	-60	-40	-20	0	20	40	60	80	100	120	140
	60.4	156.8	144.2	191.3	112	167.6	127.1	106.4	116	160.7					60.4	156.8	144.2	191.3	112	167.6	127.1	106.4	116	160.7
	92.5	201.5	177.7	159.7	105.5	74.1	97.7	115.9	67.4	73.8					102.1	166.2	82	108.3	152.7	104.9	127.3	104.7	78.7	93.6	64.3	79.9
			94.5	89.1	116.8	138.2	148.8	121.3	87.3	77.1							94.5	89.1	116.8	138.2	148.8	121.3	87.3	77.1
	245.1		140.8	144.5	229.8	196	149.9	166.5	167.3						245.1		140.8	144.5	229.8	196	149.9	166.5	167.3
			41.9	60	83.7	59.7	67.7		81.2	34.2					49.5	44.2	53.7	71.9	71.8	40
				40	44.8	87.2	56.3	84.5	55.5	31.3						79.5	54.3	40.1	36.8	140.8	161	171.3	120.5	88.6
			55.1	71.6	89.3	101.3	124.8	71.1	49.4	84.7	90.6	244.6					30.6	41.4	63.1	85.3	89.4	76.3	64.5	48.1	41.3	37
			30.6	41.4	63.1	89.2	89.4	76.3	62.2	48.1	40.8	37			96.7	121.4	141.9	148.9	184.9	154.6	179	132.7	142.2	103.6	42.3
	96.7	121.4	141.9	150	184.9	155.9	179	132.7	140.4	103.6	45.8				20.4	28.7	33.1	31.5	37.4	43.5	52.2	37.8	42	47.2
		40.7	24.9	30.7	39.7	41.7	48.6	40.6	32.3	31	30.8				41.9	39.4	32.2	35.9	40.2	74.5	193.7	60	51.5	41.7
		36.2	30.1	42.4	72.9	25.9	105.2	66	36.4	29.8					25.4	23.5	28.9	31.8	37.2	35.9	43.2	35.6	38.6	28
	39	32.1	30.7	26.4	34.4	36.9	55.4	34.7	27.8	29.2	31	27.5				62.8	54.9	44.5	38.6	41.6	33	33.2	30.3	37.5
		62.8	54.9	44.5	38.6	41.6	33	33.2	30.3	37.5						56.6	52.1	57.5	49.9	61.9	80	114.3	95.1	49.8
		41.5	42.1	53.7	60.5	52.1	73.9	108.8	124.4	171.2	84.6	46.2								244.4	311.1	255.2	228.3	55.6	101.1
		47.7	46.5	46.6	55.6	93.6	66.6	69	73.3	64.8	62.8	32.1			36.9	47.9	50.2	52.7	53.8	83.7	93.7	84.5	70	49.7	46.7
	88	64.3	84.7	71.2	59.4	83.3	61.5	76.9	100.5	60.8
Mean	103.6	80.5	76	79	86.9	90.3	92.8	86.9	78.2	69.2	55.2	77.5		mean	75.4	75.2	71	77.8	87.5	107.5	127.8	107.1	95.2	67.8	59.1	58.5
std error	29.7	18.6	13.2	13.1	13.6	12.6	10.6	9.5	10.5	11.8	9.3	41.9		std error	23.3	15.2	11.5	13.7	16.8	16.4	19.5	16.5	14.9	10.1	11.3	21.5
