# Supplementary material for: Spatially displaced excitation contributes to the encoding of interrupted motion by a retinal direction-selective circuit
Source: eLife. 2021 Jun 7;10:e68181. doi: 10.7554/eLife.68181 (PMC8211448; doi:10.7554/eLife.68181)
Supplement: Figure 5—figure supplement 1—source data 1. [file elife-68181-fig5-figsupp1-data1.xlsx]

## Sheet: A
On spiking repsonse	Control polar plot, degrees
	Global preferred direction	Enter occlusion	Exit occlusion
	90.3	100.3	285
	95.4	86.6	337.1
	28.4	21.6	116.5
	190.2	228.3	42.3
	176.7	244.2	52.4
	39.6	63.6	249
	174.6	124.8	296.8
	326.3	82.9	314.7
	271.5	263.6	89.7
	292.8	253.4	75.4
	109.9	115.3	300.1
	125	110.8	292.7
	92.5	107.2	292.7
	245.9	265.3	80.6
	101.7	94.4	270.9
	311.8	336.5	174.7
	178.8	151.1	315.2
	103.6	76.1	256.8
	243.1	160.2	333.9
	127.8	123.5	303.5
	242.2	270.8	88.6
	159.2	186.3	3.9
	148.8	159.8	341.2
	132.5	145.6	331.8
	154.7	127.9	244.9
	123.1	130.8	308.6
	140.9	122.4	302.4
	207.7	188.2	31.3
	189	209.1	25.7
	134.4	135.8	317.7
	159.2	123.2	300.2
	130.4	109.8	291.8
	131.2	148.2	340.6
	168.9	173.3	353.5
	145.7	110.6	293.8
	94.8	128.1	293.8
	132.7	124.8	304
	149.2	117.1	295.1
	106.6	132.7	321.7
	172	167.3	345.6
	137.7	124.3	312.6
	177.3	129.3	313.5
	157.8	150.7	335.3
	165.5	139.7	313.6
	117.1	90.6	276.2
	140.3	151.3	335.5
	175.1	162.6	352.9
	12.2	23.3	191.9

## Sheet: B
	Off Spikes, Control								Off Spikes, DHBE + Gabazine
	full-field pref dir	full-field null direction	Pref side pref dir	Pref side null dir	Null side pref dir	Null side null dir			Max region pref dir	Pref Reg Null Dir	Opp region pref dir	Opp region null dir
	57.3333	19.6667	12.3333	17	2	2.33333			5.5	6.5	0.5	0.5
	42.3333	23.6667	9	14	26.6667	6.33333			29.6667	18.6667	1.33333	1
	27.6667	0	11	3	24.3333	0			14.6667	12	3	1.66667
	32	10.3333	0	0	0	0			9.66667	11	1.66667	0.666667
	23.6667	11.6667	2.33333	2.33333	0	0			18.6667	19	0	0.333333
	25.5	8.5	11.6667	5	1.66667	4.33333			15.6667	9	0.333333	0.333333
	24.6667	9	7.33333	0.666667	0	0.666667			26	21.3333	1.33333	2
	38.6667	17.3333	18.3333	10.6667	2	0.666667			5	3.33333	0	0
	29.3333	14	5	5	0	0			13.3333	12.3333	1	1
	40	21	14.6667	15.3333	0	3.33333			14	13	0.666667	3
	10.3333	4.33333	9.33333	8	1.33333	3.33333			5.66667	6.33333	1.66667	0
	32.6667	5.66667	15	5	0	0			5	7	0	4.33333
	28.6667	9.33333	11	6	0.333333	0			7.66667	8.33333	0	0.333333
	43.3333	24.3333	19	5.33333	0.333333	0.333333			29	20	4	11
	35	15	15.3333	9.33333	0.333333	0.333333
	62.3333	33	3	2	11	11.3333		Mean	14.25	11.9881	1.10714	1.86905
	12	6	0	0	0	0.666667		Std error	2.34591	1.53991	0.321021	0.776285
	12	3.66667	2	1.33333	0	1.33333
	49.3333	12.6667	19	16.6667	0.333333	0
	57.6667	6.33333	20.6667	10.6667	0.666667	0
	36	14	15	8.66667	0.666667	0.333333
	11.6667	6.33333	3	4.66667	0	0
	25	6.33333	18.3333	9.33333	0	0
	36.6667	11.3333	2.33333	2	0	0.333333
	21.6667	11.6667	14	5	0	1
	25	9.33333	16.3333	8.66667	0	2
	23.6667	7.66667	18	13.6667	0	1
	12.3333	3	5	1.33333	7	3.66667
	29	12.6667	9.66667	10.3333	0	0.333333
	32.5	12	6.66667	6.33333	0.333333	0
	24	13.6667	11.3333	3.66667	0.666667	1.66667
	36.3333	17.3333	26.6667	19	0.666667	3
	15.3333	10	11.3333	8	4	2.66667
	65.6667	25.3333	23.3333	16.3333	1.33333	6.66667
	28.3333	17.3333	1.33333	0	0.333333	1.33333
	38	7	16	15.3333	15.6667	2.33333
	27.6667	16	10	3	0.333333	0.666667
	37	12	18.6667	11.6667	0.333333	6.66667
	50.6667	28	15.3333	6.66667	0	3.66667
Mean	32.3333	12.7308	11.4957	7.46154	2.62393	1.8547
Std error	2.2344	1.16642	1.09627	0.868866	1.00039	0.396376

## Sheet: D
		Occluded bar On IPSC amplitude					Occluded bar On IPSC charge transfer
		Max region pref dir	Max region null dir	Opp region pref dir	Opp region null dir		Max region pref dir	Max region null dir	Opp region pref dir	Opp region null dir
		126.3	315.2	359.1	503.3		22.7	53.6	125.2	192.7
		223	678.4	634.2	845.7		63.9	177.5	229.3	387
		78.5	113.4	193.1	463.5		13.4	20.8	48.5	165.3
		137.2	174.9	206.6	386.5		13.4	37	49.5	207
		225.8	261.1	138.8	127.1		91.5	83.1	28.2	16.1
		128.5	131.5	151	255.4		39.2	33.6	44.2	87.9
		136.6	50.3	350.9	690.7		30.3	0	82.6	254.5
		100.5	321.2	632.1	639.7		9.3	61.5	191.8	275.9
		594.5	431.3	901.6	1275		154.8	111.2	332.6	699.3
		500.9	507.2	507.8	867.4		174.6	166.2	207.7	470.3
		237.4	446.8	480.8	440.8		46.7	81.6	115.9	161
		331.2	211.1	745.9	749.8		52.3	44.8	196.2	339.6
		106.2	227.4	571.8	499.9		25.2	63	172.4	178.2
		231.5	361.1	566.4	774.5		45.1	83.7	165.8	300.6
		160.9	369.9	795.9	772.6		52.3	110.4	280.2	292.4
		118.5	233.8	1058.2	721.1		0	52.4	312.8	287.8
		287.4	309.7	499.5	494.8		80.9	85.9	167.7	190.8
		458	359.5	339.3	521.9		132.2	109.4	95.8	178.7
		61	135.6	258.6	215.1		0	14.8	14	24.4
		84.4	262.3	380.4	420.7		7.3	47.4	114.2	185
mean		216.4	295.1	488.6	583.3		52.7	71.9	148.7	244.7
std error		33.6	33.5	57	59.3		11.4	10.4	21	34.5

## Sheet: E
	DHBE + Gabazine	Full-Field On spiking response			DHBE + Gabazine	Occlusion On spiking response
		Pref Dir	Null Dir			Polar plot, degrees
		41	44.7			Global preferred direction	Enter occlusion	Exit occlusion
		35	25.3			340.3	119.9	295
		36	47.7			53.3	130.9	321.4
		5.3	5.3			132.5	184.4	52.4
		39.7	41			13.2	340.6	179.1
		36.7	35.7			160.9	30.8	219.2
		55.3	57			344.5	246.5	80.8
		16	23.3			154.7	48.9	224.9
		10.3	11.3			123.1	104.1	310.3
		15	7			140.9	110.4	307.8
		7.3	3.7			133.5	182.1	3
						162.7	140	333.8
	Mean	27.1	27.5			160.2	200.6	28.6
	Std error	5.04	5.71			160.2	193.9	26.7
						156.7	183.7	351

## Sheet: F
		On IPSC Amplitude						On IPSC Charge Transfer
		pref dir	null dir	pref dir gabazine	null dir gabazine			pref dir	null dir	pref dir gabazine	null dir gabazine
		328.8	918	31.1	29.3			272	556.1	1.1	-13.8
		83.1	277.6	72.5	80			24.1	123.8	14.5	17.5
		110.6	293	62.7	65.1			38.2	193.2	2.1	17.9
		292.3	329.4	16.3	17.9			214.7	224.4	-30.7	-30.3
		442.1	873.3	62.7	62.3			231.6	369.4	0	-4.5
		224.2	605.3	60.2	42.4			105.4	330.3	11.8	8.7
		624.4	864.1	16.6	21.2			390.8	619.1	-6.3	-6.6
		431.8	810.7	33.5	23.6			282.6	508.2	3.9	-1
		407	836.6					292.8	586.8
		501.6	1074.6					324.2	763.6
		490.5	767.6					201.2	431.8
		612.2	978.4					390.5	632.3
		478.8	1196.7					220.6	516.4
		726.7	1048.6					365.1	689.4
Mean		411	776.7	44.4	42.7			239.6	467.5	-0.5	-1.5
std error		50.3	78.9	8	8.3			31.6	52.2	4.9	5.8

## Sheet: G
		On EPSC Amplitude						On EPSC Charge Transfer
		pref dir	null dir	pref dir DHBE	null dir DHBE			pref dir	null dir	pref dir DHBE	null dir DHBE
		460.7	410.9	136.5	106.2			258.3	260.1	35.1	25.5
		241.7	195.8	176.9	264.9			123.4	94.7	58.6	137.2
		296	200.2	218.8	317.3			165.7	121.3	97.2	143.5
		202.9	127.8	239.5	143.6			86.5	38.8	129.1	63.9
		383.7	338.5	80.8	74.3			204.8	175.9	34.3	32.3
		325	375.2	222.1	269.1			183.1	213.6	106.9	91
		361.8	319.5	225.6	200.5			181.6	166.5	80.8	69.6
		419	249.3	228.8	207			209.7	154.1	100.8	81.4
		394	208.1					239.9	142.9
		506	242.4					257.8	155.5
		330.9	191.2					154.4	119
		387	317.1					219.8	157.3
		488.5	378.8					242.8	244.1
Mean		369	273.4	191.1	197.9			194.5	157.2	80.3	80.6
std error		25	24.5	19.8	30			14.5	16.5	12.3	15.3

## Sheet: H
	TPMPA spike count						TPMPA Polar plot, degrees
	Max region pref dir	Max region null dir	Opp region pref dir	Opp region null dir			Global preferred direction	Enter occlusion	Exit occlusion
	22.7	6.3	1	0.3			120.1	129.9	305.2
	10.3	8.4	0.7	0.7			124.6	253.4	56.3
	22.7	26.7	1.7	0.3			145.7	103.2	274.4
	58.7	21.3	1	8			145.4	149.3	354.8
	23.7	11	2	1.3			94.8	119.2	293.7
	57	23.3	1.3	1.7			348.5	312.1	132
	22.3	12.7	0.3	0.3			7.6	1.4	176.4
	33	13	3.3	3.3			145.6	138.1	260.5
Mean	31.3	15.3	1.4	2
std error	6.2	2.6	0.3	0.9

## Sheet: I
	Strychnine spike count						Strychnine Polar plot, degrees
	Max region pref dir	Max region null dir	Opp region pref dir	Opp region null dir			Global preferred direction	Enter occlusion	Exit occlusion
	45.3	24	4.3	1.3			182.9	135.7	31.1
	34	10	0.3	4.3			135	140.1	309.7
	19.7	8.7	0.3	2			192.8	214	43.3
	17.7	8	0.3	0			187.3	164.4	344
	29.3	15.7	5.3	1.3			182.7	131.8	282.1
	17.3	8	0	0			147.9	165.5	338.3
	60.7	21.7	1.3	3.7			156.4	162.4	354.1
	34	21.5	3.5	3.5			180	161.3	356.7
Mean	32.2	14.7	1.9	2
Std error	5.3	2.4	0.8	0.6

## Sheet: J
	MFA spike count						MFA Polar plot, degrees
	Max region pref dir	Max region null dir	Opp region pref dir	Opp region null dir			Global preferred direction	Enter occlusion	Exit occlusion
	7	2.7	0	0.3			106.6	149.2	313.7
	5	2.3	0.3	0			135	135.8	296.5
	7	5.3	0	0.3			135	99.3	266.8
	0.5	1.5	0	0			136.6	121	330.1
	5.3	5	0.3	0			156.9	131.8	323.2
	21.3	5	0.3	1.7			180	174.9	358
	3.3	3.3	0.7	1			348.6	56.4	265.2
	5	1.3	0	0			158.1	115.5	315
	5	2.3	0	0			192.349	157.675	331.043
Mean	6.6	3.2	0.2	0.4
std error	2	0.5	0.1	0.2

## Sheet: K
	Carbenoxolone spike count						Carbenoxolone Polar plot, degrees
	Max region pref dir	Max region null dir	Opp region pref dir	Opp region null dir			Global preferred direction	Enter occlusion	Exit occlusion
	30	15	0.3	3.7			176.7	128.5	303
	10.3	8.3	0.3	0.7			161.5	182.4	17.5
	20	13.5	0.5	2.5			159.7	110.5	280.8
	25	6.7	0.7	2.3			128.3	174.3	334.9
	13	9.5	0	0			185.3	205	40.4
	17.7	10	0	0			170.3	153.7	320.2
	22.5	11.3	0.3	0.3			155.4	162	343.9
	31	10.7	0.3	0.7			171.7	187	5.2
Mean	21.2	10.6	0.3	1.3
std error	2.6	0.9	0.1	0.5
