# Supplementary material for: Spatially displaced excitation contributes to the encoding of interrupted motion by a retinal direction-selective circuit
Source: eLife. 2021 Jun 7;10:e68181. doi: 10.7554/eLife.68181 (PMC8211448; doi:10.7554/eLife.68181)
Supplement: Figure 5—figure supplement 2—source data 1. [file elife-68181-fig5-figsupp2-data1.xlsx]

## Sheet: B
		Posterior preferring amplitudes for vector sums									Anterior preferring amplitudes for vector sums
	degrees	0	45	90	135	180	225	270	315		0	45	90	135	180	225	270	315
		0.085853	0.142792	1.09613	2.60496	1.39924	0	0.008928	0.233216		4.88363	4.89313	2.66128	1.86533	0.321657	0.070503	1.51243	5.74395
		0.193217	0.456586	0.593648	1.66861	0.952875	0.377772	0.320353	0.274071		2.56856	0.44685	0.527712	0.132456	0.12825	0.154846	0.173254	2.93501
		0.306619	0.409143	0.369839	1.18329	2.92216	2.52681	0.902415	0.385351		2.82322	1.45186	0.52213	0.681921	0.379054	1.91278	2.65634	3.3032
		0.531687	0.695558	0.552886	1.76389	2.86349	3.23155	2.43438	1.15699		7.07489	5.20411	3.40747	3.64533	1.02588	0.195686	0.49188	3.40816
		1.08947	1.37301	2.36938	2.89099	3.73628	2.80102	0.420149	0.729759		5.14945	3.56593	0.375516	0.204288	0.217623	1.29225	4.41376	5.82148
		1.10565	1.12346	2.07257	4.18069	5.30611	1.90756	0.190418	0.419102		0.485529	0.907546	0.366551	0.077098	0.240471	0.283706	0.171561	0.346739
		0.327909	0.978005	1.14494	1.91079	2.32092	1.83847	0.225615	0.197272		1.77912	0.33664	0.197755	0.258836	0.420968	0.395341	3.33339	4.91401
		0.27127	0.446076	1.28905	1.47755	2.75873	1.07957	0.203494	0.259995		4.80849	3.51372	1.3765	-0.001295	-0.045506	-0.046431	1.26667	4.51797
		0.331052	0.756021	1.81858	0.768238	1.97821	2.03733	0.218218	0.234167		4.1785	4.75998	1.69835	0.265942	0.048013	0.042086	1.15574	3.24989
		0.149894	0.148076	0.201179	0.616517	1.07216	1.48154	1.49657	0.600323		6.90321	7.22053	2.60415	0.905947	0.691575	0.871179	1.72468	5.07717
		0.127332	0.268939	0.133539	0.491107	0.840465	1.25018	0.945171	0.606377		4.8727	5.73093	1.67341	0.873988	0.879928	0.800101	1.08021	2.20657
		0.215595	0.332263	0.539153	1.28983	2.57669	1.44278	0.875075	0.491239		4.97717	4.10845	0.717897	0.279813	0.286882	0.859172	3.06668	6.02967

## Sheet: D
		posterior-preferring cells, time to peak					anterior-preferring cells, time to peak
		full field	occlusion				full field	occlusion
		1.17202	2.01234				1.35698	1.99977
		1.25747	1.87517				1.3427	1.95691
		1.20583	1.86656				1.51411	1.67123
		1.26407	1.87947				1.32843	1.77124
		1.13933	1.6985				1.37127	1.82836
		1.27909	1.8033				1.47127	1.94265
		1.27211	1.73343				1.14274	1.0856
		1.30007	1.85924				1.31419	1.67131
		1.19524	1.80335				1.28562	1.72845
		1.06242	1.39094				1.29988	1.71412
		1.43986	1.63558				1.357	1.77124
		1.29995	1.10426				1.75702	1.71416
Mean		1.24062	1.72185				1.37843	1.73792
std error		0.0275307	0.0720307				0.0434817	0.0676703
