# Supplementary material for: Spatially displaced excitation contributes to the encoding of interrupted motion by a retinal direction-selective circuit
Source: eLife. 2021 Jun 7;10:e68181. doi: 10.7554/eLife.68181 (PMC8211448; doi:10.7554/eLife.68181)
Supplement: Figure 5—source data 1. [file elife-68181-fig5-data1.xlsx]

## Sheet: 5C
	Control, spikes									DHBE and Gabazine
	Global Preferred direction	Global Null Direction	Preferred Side Preferred Direction	Preferred Side Null direction	Null Side Preferred Direction	Preferred Side Null Direction				Max Region Preferred direction	Max region null direction	Opp region preferred direction	Opp region null direction
	49	7	18.33	30.33	0	0.67				22.33	17.33	0	0
	33.33	0	29	5	0	3.67				7.33	8.67	0.67	1.33
	37.67	5.33	49	6.67	1	1.67				14.5	13	0.5	1
	31.67	1.67	8.333	5.67	0	0.67				26.67	23	6	4.33
	37.67	7.33	10	8	0	0.33				8	6.67	4.67	2.67
	36.33	5.33	11.67	2.33	0	0				14	15.67	0.33	0
	14.67	0	9	6.33	0	0.33				5.33	7.33	0	0
	27.33	0	5.33	4	1.67	1				17.33	19.67	0	0.33
	27	1.67	14.67	9.67	0	0				18	11	4	0.67
	36	4	13.67	12.33	0.33	1				11	13.33	1.67	0.33
	36	8	20.33	13	0.33	0				12.67	11.67	3.33	3.33
	39.67	3.67	23.67	20	0.33	0.67				26	12.33	1.67	0
	14.33	3.33	13.67	8	3.67	0				16	12.67	0.33	0
	42.67	0	22.67	10.67	0	0				11	6.5	0.5	0
	39	3	15	10	0	0
	32.67	12.67	13	8.67	2.33	5.33			Mean	15.0114	12.7743	1.69071	0.999286
	39.33	2	12.33	5.67	0.33	0			std error	1.76405	1.30364	0.532582	0.381022
	38.67	2	16	10.67	0	0
	37	18.33	5	4.33	3.33	2
	22.33	0	28.67	15	0	0
	29.33	4.67	22	13.33	0	0.67
	31.33	5	28.33	17	0.33	1.33
	33.33	1	19	11.67	0	0
	32	1.67	21.33	13.33	0.67	0.67
	36.67	9	19	4	4.33	0.67
	33.33	6.33	27	11	0	1
	35.33	5	27	13.33	0	0.67
	23.67	3	8.33	4.33	0	0.33
	16.33	0.33	12.67	8	0.67	0
	36.67	4.33	37	14.67	0	0.67
	21	4	20.33	12	0.67	0.33
	46.67	9	24	11.33	1	2
	29	1.33	14.67	12.67	1	0
	51.5	8.5	32	15	0	0
	54.33	13.67	38.67	24	0.67	0
	25	3	20	10	0.33	0.33
	30.67	6	50.167	24.33	0.5	0.167
	39.67	1.33	24.33	13	0.67	0.67
	34	3.833	22	9.67	0.67	0.67
	55.33	4.83	53.67	25	1.83	0.67
	33.167	3.83	36.5	26.83	0.167	0.83
	30.33	11.67	23.25	13	0.5	0.75
	32.5	2.67	32.33	14	0.33	0.167
	51.33	1.33	34	18.33	2.67	1.33
	59.33	2.67	21.67	9.67	0	0
	34.33	2	20.33	10.67	0	0
	52.5	9.167	53	30	1.33	0
	62	14	32.67	17	2.67	1.67
Mean	35.8956	4.76021	23.2206	12.5729	0.715146	0.686125
Std Error	1.55985	0.600554	1.73458	0.974033	0.153757	0.143082

## Sheet: 5D
	Control	Amplitude				Control	Charge Transfer				DHBE + Gabazine	Amplitude				DHBE + Gabazine	Charge Transfer
	Max Region Pref Direction	Max Region Null Direction	Opp Region Pref Direction	Opp Region Null Direction		Max Region Pref Direction	Max Region Null Direction	Opp Region Pref Direction	Opp Region Null Direction		Max Region Pref Direction	Max Region Null Direction	Opp Region Pref Direction	Opp Region Null Direction		Max Region Pref Direction	Max Region Null Direction	Opp Region Pref Direction	Opp Region Null Direction
	279.161	375.581	177.721	147.839		90.6178	137.838	41.4116	55.411		80.2599	184.465	54.0148	46.8507		27.5674	29.63	11.5547	12.0281
	293.049	272.536	123.656	124.099		76.2106	62.6265	27.1478	35.2146		112.057	216.106	65.5075	67.7096		42.3218	36.568	14.0434	9.16393
	429.021	394.334	134.344	103.685		130.63	89.6881	34.0373	36.9956		131.859	321.704	68.1791	78.3369		37.5566	39.4614	14.6473	13.4409
	297.551	276.598	81.3238	75.5079		83.7589	51.3967	12.1102	9.77213		248.775	298.858	57.8164	66.517		52.5039	48.2405	14.538	19.1612
	168.419	206.56	118.533	106.381		44.7668	34.308	27.5987	33.2474		62.7151	127.606	40.3763	29.5431		18.2575	22.9699	10.3225	6.63647
	199.311	175.216	97.667	84.8434		48.6992	33.7803	19.8117	15.9801		244.735	259.576	60.6934	31.508		78.9516	46.328	10.2356	2.33401
	193.91	179.128	63.1731	61.0042		41.5243	30.8316	9.66227	11.7508		107.322	205.72	29.9299	25.544		16.3692	20.5205	4.2963	2.31484
	301.746	239.475	135.282	127.78		92.2164	55.7827	27.0636	28.4935		126.948	154.7	58.7513	49.0281		36.4875	29.9382	13.4196	12.0905
	138.803	177.075	79.8019	74.6171		36.6347	32.4482	15.2486	24.1161		77.2934	144.14	31.0695	59.9927		16.605	17.3276	3.40459	8.38085
	154.287	193.725	50.8933	59.9764		31.8593	31.4887	3.32767	4.07896		99.5109	146.107	25.4956	17.73		15.3208	14.52	3.10972	0.254026
	309.928	273.32	129.996	117.151		85.591	57.1539	28.9813	23.3412		48.3561	167.747	44.7347	36.0736		12.621	22.6477	6.57988	5.58638
	220.878	168.666	82.9383	120.204		69.7152	48.8824	16.064	38.0156		97.6992	155.168	56.4394	47.7871		26.0524	27.4264	8.25646	5.19577
	366.916	340.078	89.3693	124.054		104.246	82.575	17.3302	29.2158		96.8909	380.293	47.6151	27.5505		32.3117	48.9419	11.5647	7.24964
	332.953	273.813	100.694	111.256		118.221	88.9683	10.8	28.171
	160.324	177.494	24.4192	31.7418		34.0113	22.7195	0.625419	4.55126
	327.224	255.113	129.633	78.7621		120.408	64.3953	6.61468	10.244
	238.779	218.868	87.8187	89.8391		47.3298	39.1073	17.0303	18.0533
	289.788	214.759	142.653	111.732		111.438	54.3223	46.9612	43.4694
	150.076	140.846	26.7847	23.7401		25.8261	20.2385	1.85389	2.71875
Mean	255.375	239.641	98.7738	93.3796		73.3528	54.6606	19.1411	23.8337		118.032	212.476	49.2787	44.9363		31.7636	31.1169	9.69021	7.98743
Std error	19.0205	16.4127	9.22309	7.65356		16.8283	12.54	4.39126	5.46783		17.1294	22.002	3.89072	5.23151		5.16443	3.27664	1.16645	1.4526

## Sheet: 5E
	Top Left Contrast (Bright Bar, Dark Occluder, Medium Background)						Bottom Left Contrast (Dark bar, dark occluder, medium background)						Top Right Contrast (Medium bar, medium occluder, dark background)						Bottom Right Contrast (Dark bar, medium occluder, medium background)
	On						On						On						On
	Max Region Pref Direction	Max Region Null Direction	Opp Region Pref Direction	Opp Region Null Direction			Max Region Pref Direction	Max Region Null Direction	Opp Region Pref Direction	Opp Region Null Direction			Max Region Pref Direction	Max Region Null Direction	Opp Region Pref Direction	Opp Region Null Direction			Max Region Pref Direction	Max Region Null Direction	Opp Region Pref Direction	Opp Region Null Direction
	11.6667	8.33333	0	0.333333			20.3333	13.6667	0	0			9.5	5.5	3	1.5			27	12.3333	0.333333	2
	26.6667	13.3333	0.666667	4			14.6667	15	0.333333	1.33333			23	7.66667	0.666667	1.33333			25	13.6667	0.666667	0
	26	18.3333	4.66667	4.33333			48.3333	25.3333	0	5.66667			15.6667	7	2.33333	1			36.6667	23	2.33333	5.33333
	49.6667	43.6667	1	0.333333			13.3333	9.66667	1.66667	1.33333			15.6667	7	0.333333	0.333333			11.5	3.5	0	0.5
	26.3333	7	0	0			18.6667	12.6667	0.333333	0.666667			26	13.6667	4	5			31.6667	13.6667	0	0.333333
	40	25	4.33333	5			27.6667	14.3333	4.33333	3.66667			43.3333	17.3333	1	0.333333			13.6667	8.66667	1	1.66667
	11	8.33333	0	0.666667			44.3333	30.6667	4.66667	5.33333			16	9.66667	2	2.66667			11.3333	1.66667	0.333333	0
	24	8.5	0	0			20.3333	9.33333	0	0			14.6667	9.33333	1	0			35.6667	29.6667	0.333333	0
	23	5.66667	0	1.66667			34.6667	14.3333	0.333333	0			6	8.33333	0	2.66667
	19.3333	9.33333	0.666667	1.33333			16	3.66667	0.333333	0.666667
	21.3333	8	0	0.666667
mean	25.3636	14.1364	1.0303	1.66667		mean	25.8333	14.8667	1.2	1.86667		mean	18.8704	9.5	1.59259	1.64815		mean	24.0625	13.2708	0.625	1.22917
std error	3.38698	3.4256	0.528873	0.56318		std error	3.97127	2.47017	0.571332	0.69602		std error	3.66327	1.24722	0.443672	0.527372		std error	3.75303	3.31662	0.27049	0.647751
	Off						Off						Off
	Max Region Pref Direction	Max Region Null Direction	Opp Region Pref Direction	Opp Region Null Direction			Max Region Pref Direction	Max Region Null Direction	Opp Region Pref Direction	Opp Region Null Direction			Max Region Pref Direction	Max Region Null Direction	Opp Region Pref Direction	Opp Region Null Direction
	10.6667	8	0.333333	0.333333			51.3333	34.6667	0	0.666667			10.5	11	6	4.25			34.3333	24.6667	0	0.666667
	47.6667	34	2.66667	1.33333			23.6667	15	1.33333	0.666667			35.6667	25	1	0			11.6667	8.33333	0	0
	35.6667	18.3333	8.66667	4			11.3333	8	0.333333	2.66667			10	4.33333	0.333333	1			8.33333	6.33333	0	0
	25.6667	20.6667	3	2.66667			28	19	0.666667	0.333333			7.33333	22	11	1.33333			15.6667	19	7	0
	24.6667	14.3333	5.33333	2			42.3333	29.6667	6.66667	0			30.6667	13	0	0.333333			8.33333	9.66667	0	0.333333
	39	27.3333	3.66667	5			21	16.3333	0.666667	1			11	6.66667	0.666667	0			31.3333	14.6667	0	0
	26.5	16.5	1.25	0			40.3333	19.3333	0	0			13.3333	0.666667	0.333333	0			11	6	0	0
	32.3333	10.3333	0	0			15	7	0	0			13	8	0.333333	0.333333			9.33333	4.33333	0	0
	17	11.3333	2.66667	2															14.3333	11.3333	0	0
	17.6667	9	0	0
Mean	27.6833	16.9833	2.75833	1.73333		mean	29.125	18.625	1.20833	0.666667		mean	16.4375	11.3333	2.45833	0.90625		mean	16.037	11.5926	0.777778	0.111111
std error	3.38051	2.5424	0.815332	0.531394		std error	5.01147	3.39727	0.796663	0.31497		std error	3.73886	2.98541	1.40427	0.508713		std error	3.29114	2.24005	0.777778	0.0785674

## Sheet: 5G
	pDSGC	normalized amplitude			pDSGC	normalized area
	Null direction Response				Null direction Response
	Full-field	Occlusion			Full-field	Occlusion
	0.082112	0.547032			0.017148	0.361936
	0.164251	0.553445			0.079909	0.239708
	0.104929	0.416594			0.045504	0.268628
	0.102061	0.495365			0.065133	0.358945
	0.209499	0.325428			0.366329	0.34282
	0.208373	0.632091			0.117899	0.418872
	0.141284	0.890017			0.122358	0.958797
	0.098332	0.203956			0.087362	0.160067
	0.088464	0.433649			0.052075	0.397245
	0.098944	0.122452			0.008456	0.154189
	0.21512	0.396544			0.162458	0.353625
	0.083671	0.047444			0.006439	0.00661
Mean	0.133087	0.422001			0.0942558	0.33512
Std error	0.0151846	0.066809			0.0283779	0.0666491

## Sheet: 5H
	aDSGC	normalized amplitude			aDSGC	normalized area
	Null direction Response				Null direction Response
	Full-field	Occlusion			Full-field	Occlusion
	0.324747	0.353008			0.175902	0.175822
	0.04513	0.121023			0.006744	0.116855
	0.114754	0.153275			0.104655	0.236184
	0.145003	0.334326			0.138038	0.283864
	0.035092	0.270038			0	0.316206
	0.197667	0.429217			0.259153	0.731085
	0.052673	0.014872			0.050406	0.004471
	0.009464	0.039819			0	0.057175
	0.05587	0.086218			0.010217	0.055411
	0.095779	0.115042			0.058093	0.087677
	0.139611	0.183279			0.112864	0.182035
	0.046406	0.086771			0.03092	0.082102
Mean	0.105183	0.182241			0.078916	0.194074
Std error	0.0255304	0.0386056			0.0235385	0.0562293
