# Supplementary material for: Spatially displaced excitation contributes to the encoding of interrupted motion by a retinal direction-selective circuit
Source: eLife. 2021 Jun 7;10:e68181. doi: 10.7554/eLife.68181 (PMC8211448; doi:10.7554/eLife.68181)
Supplement: Figure 6—source data 1. [file elife-68181-fig6-data1.xlsx]

## Sheet: 6B
	Null Direction spikes															Pref Direction spikes
Location	-330	-275	-220	-165	-110	-55	0	55	110	165	220	275	330		Location	-330	-275	-220	-165	-110	-55	0	55	110	165	220	275	330
	1	9.66667	6.33333	4	3	1.33333	7.66667	15.6667	24.6667	14.6667	4.66667	0.666667	0			0	0	0	0	0.666667	0.666667	1.33333	2	13.3333	18.6667	21.6667	24	31.3333
	0	2	1	1	3	3	9.33	17.33	15.33	9.33	0.33	0.67	0.67			0	0	0	0	0.333333	0.666667	0.333333	7	15.3333	20.3333	27.3333	31.3333	31
	0.666667	2.66667	3	0.666667	0.333333	1.33333	1	1.33333	3.33333	0.333333	0	0	0			1.33333	0.666667	1.66667	0.666667	1.66667	3.33333	5	8.66667	16.3333	22.3333	25.3333	26.3333	26
	3.66667	4	3.33333	3	3.33333	2	1.66667	7.66667	10.6667	9	2.33333	0	0			0.333333	0	0	0.333333	0	4	7	13.6667	17.3333	20.6667	25.3333	27.6667	28.6667
	3.66667	4.66667	3	3	2.66667	3	5	10.3333	11	10.6667	3	0.333333	0			3.66667	1.66667	2.66667	5.66667	4.66667	4.33333	16.6667	27.6667	42.3333	52	58.3333	57.6667	55.3333
	6	4.66667	6	3.33333	3.66667	3	3.66667	7	7	1	0.666667	0	0			0	0	0.333333	0.333333	1	2.33333	15	35	47.6667	44	45.3333	45.6667	45.6667
	14	11.6667	15	10	7.33333	10.6667	18	21	23.3333	11	1.66667	4.66667	2.33333			2.66667	3	2.66667	4	3.33333	3	17.3333	26	39	47.6667	53	58	63.3333
	12.6667	11.3333	15	13	13	14	18.3333	24.3333	17.6667	10.6667	4.33333	0.666667	0.333333			0.25	0.75	0.75	0.75	1.5	6.5	20.75	39.25	45.75	49.25	48.25	45.75	51.25
	7.5	14	13.6667	12	8.33333	10	17.3333	26.3333	25	12.6667	4	3.33333	2.66667			3	3.5	7	6	14.5	17	15.75	15.75	23.75	26.5	30	32	34
	10.3333	7.66667	10.3333	12	8.33333	6	7.33333	9.66667	11.6667	10	1.6	0.8	1.2			2.33333	5	1.33333	8	11.3333	12.3333	17.6667	28.3333	35	43.3333	48	50	56.6667
mean	5.95	7.23333	7.66667	6.2	5.3	5.43333	8.933	14.0663	14.9663	8.933	2.25967	1.11367	0.720333			1.35833	1.45833	1.64167	2.575	3.9	5.41667	11.6833	20.3333	29.5833	34.475	38.2583	39.8417	42.325
std error	1.45863	1.21805	1.55754	1.42451	1.09943	1.30923	1.93505	2.36387	2.18602	1.3447	0.489048	0.457198	0.294498			0.413887	0.516105	0.619892	0.876832	1.44679	1.52504	2.16206	3.64932	3.96247	3.99099	3.92294	3.77005	3.9423

## Sheet: 6C
	Null Direction firing rate															Pref Direction firing rate
Location	-330	-275	-220	-165	-110	-55	0	55	110	165	220	275	330		Location	-330	-275	-220	-165	-110	-55	0	55	110	165	220	275	330
	13.3333	13.3333	26.6667	13.3333	13.3333	26.6667	26.6667	26.6667	53.3333	0	0	0	0			0	0	0	0	13.3333	13.3333	13.3333	13.3333	93.3333	80	80	93.3333	66.6667
	26.6667	40	26.6667	26.6667	26.6667	13.3333	26.6667	66.6667	106.667	80	26.6667	0	0			0	0	0	0	13.3333	13.3333	13.3333	120	93.3333	80	66.6667	66.6667	66.6667
	26.6667	26.6667	26.6667	26.6667	40	53.3333	80	80	106.667	93.3333	26.6667	13.3333	0			13.3333	13.3333	13.3333	13.3333	13.3333	53.3333	80	93.3333	120	93.3333	66.6667	80	80
	40	53.3333	40	26.6667	26.6667	26.6667	53.3333	93.3333	120	26.6667	26.6667	0	0			13.3333	0	0	13.3333	0	40	66.6667	120	146.667	80	80	80	93.3333
	13.3333	40	40	26.6667	26.6667	13.3333	53.3333	120	106.667	93.3333	66.6667	13.3333	0			13.3333	13.3333	13.3333	40	26.6667	40	80	120	133.333	106.667	106.667	106.667	93.3333
	0	26.6667	26.6667	13.3333	40	53.3333	120	120	106.667	80	13.3333	13.3333	13.3333			0	0	13.3333	13.3333	13.3333	26.6667	93.3333	106.667	106.667	80	93.3333	93.3333	93.3333
	40	53.3333	40	40	40	40	106.667	106.667	106.667	26.6667	13.3333	26.6667	13.3333			13.3333	13.3333	13.3333	26.6667	13.3333	26.6667	93.3333	133.333	120	106.667	120	106.667	106.667
	40	40	40	40	40	40	80	120	66.6667	80	40	13.3333	13.3333			0	10	10	20	10	30	70	120	130	110	100	90	100
	40	53.3333	66.6667	53.3333	40	53.3333	106.667	106.667	106.667	53.3333	26.6667	13.3333	13.3333			10	10	30	30	100	110	70	40	50	60	50	60	60
	48	24	48	48	32	40	72	112	64	40	24	16	16			13.3333	26.6667	13.3333	26.6667	26.6667	26.6667	66.6667	120	133.333	106.667	80	93.3333	106.667
Mean	28.8	37.0667	38.1333	31.4667	32.5333	36	72.5333	95.2	94.4	57.3333	26.4	10.9333	6.93333			7.66667	8.66667	10.6667	18.3333	23	38	64.6667	98.6667	112.667	90.3333	84.3333	87	86.6667
Std error	4.50039	4.04827	3.66588	3.90505	2.63687	4.46292	9.44763	8.67938	6.76179	9.43682	5.13777	2.47323	2.12219			1.92717	2.53372	2.63718	3.71987	8.12011	8.10426	8.30489	11.5042	8.12454	4.85277	6.05275	4.45485	4.96904
