# Supplementary material for: Spatially displaced excitation contributes to the encoding of interrupted motion by a retinal direction-selective circuit
Source: eLife. 2021 Jun 7;10:e68181. doi: 10.7554/eLife.68181 (PMC8211448; doi:10.7554/eLife.68181)
Supplement: Figure 7—figure supplement 1—source data 1. [file elife-68181-fig7-figsupp1-data1.xlsx]

## Sheet: A
	Full-field spiking response onset times relative to preferred direction (PD) onset time, seconds										Occlusion null response onset times relative to null direction (ND) onset time, seconds
		Angular deviation from PD, deg										Angular deviation from null direction (ND), deg
	Cell index	-225	-135	-90	-45	0	45	90	135		Cell index	-225	-135	-90	-45	0	45	90	135
	1	NaN	NaN	0.125	0.05	0	0	NaN	NaN		1	NaN	NaN	NaN	0.1	0	0.025	NaN	NaN
	2	NaN	NaN	0	0	0	0.025	-0.175	NaN		2	NaN	NaN	NaN	NaN	0	-0.05	-0.075	NaN
	3	NaN	NaN	0.075	0.025	0	0.2	0.3	NaN		3	0	0.025	0	0.025	0	0.025	0.175	0.15
	4	0.825	NaN	NaN	-0.025	0	0.1	0.175	0.175		4	NaN	NaN	NaN	0.025	0	0.025	NaN	NaN
	5	0.65	0.025	0.175	0.15	0	0.025	0.4	0.6		5	NaN	-0.075	0.025	0.05	0	-0.075	-0.075	NaN
	6	NaN	NaN	0.075	0.125	0	-0.05	NaN	NaN		6	NaN	NaN	NaN	0	0	0.025	NaN	NaN
	7	0.675	NaN	NaN	0.075	0	-0.075	NaN	NaN		7	NaN	NaN	NaN	NaN	0	-0.025	0.05	NaN
	8	NaN	-0.025	-0.1	-0.125	0	0.2	0	-0.1		8	NaN	-0.05	-0.075	-0.025	0	NaN	0	-0.05
	9	NaN	NaN	NaN	-0.15	0	0.15	0.35	0.375		9	-0.1	-0.1	-0.1	-0.075	0	NaN	NaN	NaN
	10	0.65	0.35	0.3	0.225	0	-0.025	0.15	0.275		10	NaN	NaN	NaN	NaN	0	-0.1	NaN	NaN
	11	0.7	NaN	-0.05	-0.05	0	0.075	0.075	0.65		11	NaN	-0.05	0.075	0	0	0	0.025	NaN
	12	0.225	0.225	0.2	0.225	0	0	0.075	0.3		12	NaN	0.025	0.025	0.025	0	-0.025	0	NaN
	13	0.1	NaN	0.025	-0.125	0	0.125	0.325	0.4		13	NaN	NaN	0.05	0	0	0.05	NaN	NaN
	14	NaN	NaN	0.2	0.05	0	0.075	0.225	0.525		14	NaN	NaN	NaN	0	0	0.025	NaN	NaN
	15	0.5	0.05	0.15	0.125	0	0.025	0.175	0.525		15	NaN	0.025	0.025	0.05	0	0.025	NaN	0
	16	NaN	0.4	-0.025	0	0	0.05	0.5	0.5		16	NaN	-0.05	-0.05	0	0	NaN	NaN	NaN
	17	0.325	-0.05	-0.15	-0.025	0	-0.05	-0.075	0.325		18	0.3	NaN	0.025	0.025	0	0.025	0.075	NaN
	18	1.125	0.475	0.25	0.15	0	0.125	0.3	0.55		21	NaN	NaN	0	0	0	0.025	0	NaN
	20	0.8	0.075	0.05	0.25	0	0.25	-0.1	0.525		23	NaN	-0.05	NaN	-0.025	0	0.025	0.025	-0.05
	21	0.125	0.125	0.025	-0.125	0	0.075	0.1	0.425		26	NaN	NaN	0.075	-0.025	0	0	0.025	0.05
	22	0.525	0.025	0	0	0	0	0.05	0.05		27	NaN	NaN	NaN	0	0	0	0.1	NaN
	23	0.85	0.2	0	0	0	0.125	0.1	0.75		28	NaN	0	-0.025	-0.025	0	0	0	0.025
	24	NaN	-0.15	-0.075	-0.1	0	0.1	0.175	0.1		29	NaN	0.025	0.075	0.05	0	0.05	0	0.025
	25	-0.35	-0.2	-0.15	-0.05	0	-0.225	-0.375	-0.3		30	NaN	NaN	0.025	-0.025	0	0	0.2	0
	32	0.975	0.325	0.325	0.35	0	0.025	0.15	0.95		31	-0.025	NaN	NaN	0.075	0	0	0	NaN
	33	0.725	-0.075	0.1	0.1	0	0.05	0.05	0.55		32	NaN	-0.025	-0.025	0	0	-0.025	0	NaN
	34	NaN	0.325	-0.05	-0.175	0	0.05	0.025	NaN		33	NaN	0.025	0.05	0	0	-0.025	0.1	NaN
	35	NaN	0.775	-0.025	-0.05	0	-0.025	0.075	0.95		34	NaN	NaN	NaN	-0.025	0	NaN	NaN	NaN
	36	0.85	NaN	0.6	0.125	0	0.2	0.25	0.95		35	NaN	NaN	0.025	0	0	0	0	NaN
	37	0.075	0.1	-0.05	-0.05	0	0.25	0.175	0.15		36	NaN	NaN	NaN	0	0	0.025	NaN	NaN
	38	0.95	0.375	0.35	0.125	0	0.125	NaN	NaN		37	NaN	NaN	0.6	0.025	0	0	0.025	NaN
	39	0.175	0.325	0.25	0.175	0	0.025	0.05	-0.125		38	NaN	NaN	NaN	0	0	0.1	NaN	NaN
	40	0.8	0.9	0.175	0	0	0	0.15	0.2		39	NaN	NaN	0.025	0	0	0	NaN	NaN
	41	0.775	NaN	0.2	0.075	0	0.15	0.3	0.375		40	NaN	NaN	-0.025	-0.025	0	0	-0.025	NaN
	42	0.85	0.725	0.3	0.225	0	-0.15	-0.125	NaN		41	NaN	NaN	0	0	0	0.025	0.125	NaN
	43	0.075	0.55	0.05	0	0	-0.1	-0.1	0.5		42	NaN	NaN	NaN	NaN	0	0.025	0.05	NaN
	44	0.95	0.975	0.525	0.05	0	0.05	NaN	1.075		43	NaN	NaN	0.05	0.025	0	0	0	NaN
	45	0.75	NaN	NaN	0.225	0	0.225	0.25	0.3		44	-0.15	NaN	NaN	-0.075	0	-0.025	NaN	-0.225
	46	0.225	0.225	0.225	0.2	0	-0.15	0.075	0.25		45	NaN	NaN	NaN	NaN	0	0	0.025	0.05
	47	0.125	0	0.025	0.25	0	0.025	0.3	0.325		47	NaN	-0.05	NaN	0.025	0	0	0.05	0
	49	NaN	NaN	0.2	0.075	0	-0.2	-0.225	NaN		48	NaN	NaN	0.075	0	0	0	0.125	NaN
	50	0.225	0.2	-0.025	-0.025	0	0.15	0.25	0.325		53	NaN	NaN	0	0	0	0.025	NaN	NaN
	51	0.725	-0.05	0.1	0.1	0	0.05	0.05	0.55		55	NaN	NaN	NaN	NaN	NaN	NaN	NaN	NaN
	52	0.45	0.475	0.025	0	0	-0.075	-0.275	0.525		58	NaN	NaN	0.025	0	0	0	0	NaN
	54	0.35	0.325	0.55	0.3	0	0.175	0.4	0.75		59	NaN	0.025	0	0	0	-0.025	NaN	NaN
	55	NaN	NaN	0.5	0.125	0	0.175	0.225	0.2		60	NaN	NaN	NaN	0	0	0.025	NaN	NaN
	56	0.575	-0.05	0	-0.05	0	0.05	0.025	0.175		61	NaN	NaN	0	-0.025	0	-0.025	NaN	NaN
	57	NaN	-0.3	-0.275	-0.275	0	-0.175	-0.45	-0.3		62	NaN	NaN	0.6	0.025	0	0	0.025	NaN
	58	NaN	0.775	-0.025	-0.075	0	-0.025	0.075	0.95		63	NaN	NaN	0.025	0.025	0	0.05	0.05	0.05
	59	0.875	NaN	0.25	0.025	0	0.2	0.325	0.425		64	NaN	NaN	NaN	0	0	0.1	NaN	NaN
	60	0.85	NaN	0.6	0.125	0	0.2	0.25	0.95		66	NaN	NaN	0.05	0.025	0	0.025	NaN	NaN
	63	0.5	-0.2	-0.2	-0.325	0	0.1	0.1	-0.025		68	NaN	NaN	-0.025	-0.025	0	0	-0.025	NaN
	64	0.85	0.275	0.25	0.025	0	0.025	NaN	NaN		71	NaN	NaN	0.025	0	0	0.075	NaN	NaN
	66	0.675	0.625	0.25	-0.05	0	-0.175	-0.15	NaN		72	0.025	NaN	-0.025	0	0	0	0.025	NaN
	67	0.325	0.225	0.05	-0.15	0	0.125	0.05	-0.1		73	NaN	NaN	NaN	0	0	NaN	NaN	NaN
	68	0.8	0.9	0.175	0.075	0	0	0.15	0.2		76	NaN	NaN	0	0	0	0.025	0.125	NaN
	69	0.925	0	0.275	-0.1	0	-0.125	0.25	0.175		79	NaN	NaN	0	0	0	-0.025	0	NaN
	70	0.375	0.225	0	0	0	-0.1	-0.075	0.35		80	NaN	0	NaN	0	0	0	0	-0.05
	71	NaN	NaN	0.275	0.075	0	0.175	0.475	0.5		81	NaN	NaN	NaN	0.15	0	NaN	NaN	NaN
	72	0.1	0.2	-0.15	0.05	0	-0.025	-0.05	0.65		82	NaN	NaN	NaN	0	0	0.025	NaN	NaN
	73	NaN	NaN	0.175	0.025	0	0.025	NaN	NaN		83	NaN	NaN	NaN	0.025	0	0.175	NaN	NaN
	74	0.75	0.6	-0.15	0.075	0	0.025	0.15	0.05		84	NaN	NaN	NaN	0.025	0	0.05	0	NaN
	75	0.75	NaN	0.075	0	0	0.175	0.325	0.575		85	NaN	NaN	NaN	0	0	-0.025	NaN	NaN
	76	0.775	NaN	0.2	0.075	0	0.15	0.3	0.375		86	NaN	NaN	NaN	0.025	0	-0.025	0	NaN
	77	NaN	-0.275	-0.1	-0.15	0	0	-0.1	NaN		87	NaN	NaN	NaN	-0.025	0	0.025	NaN	NaN
	78	NaN	0.675	0	-0.05	0	-0.125	-0.15	-0.25		88	NaN	NaN	NaN	0.1	0	-0.05	NaN	NaN
	79	NaN	NaN	NaN	0.05	0	0.075	NaN	NaN		89	NaN	NaN	NaN	0	0	-0.025	-0.025	NaN
	82	NaN	NaN	-0.175	-0.175	0	0.25	0.4	0.8		90	NaN	NaN	0.075	0.025	0	0	NaN	NaN
	83	NaN	NaN	NaN	-0.25	0	0.15	0.15	0.85		91	NaN	NaN	0.15	0.05	0	0.125	NaN	NaN
	87	0.85	0.725	0.3	0.225	0	-0.15	-0.125	NaN		Mean	0.00833333	-0.01875	0.0480263	0.00912698	0	0.0108871	0.0309211	-0.00192308
	88	NaN	NaN	0.15	0.075	0	0.025	0.05	NaN		SEM	0.0189074	0.0050957	0.016799	0.00430073	0	0.00518776	0.00725272	0.0103867
	89	0.525	0.425	0.25	-0.05	0	0.025	0.05	0.525
	90	0.575	0.525	0.25	0.075	0	-0.175	0.15	0.925
	Mean	0.577	0.278125	0.11791	0.0294521	0	0.0414384	0.107308	0.407895
	SEM	0.0369164	0.0385054	0.0225778	0.0156613	0	0.0139326	0.0230728	0.039343

## Sheet: B
	Full-field spiking response onset time and duration								Occlusion null response onset time and duration
		Onset time (s)			Duration (s)					Onset time (s)			Duration (s)
	Cell index	PD - 45 deg	PD	PD + 45 deg	PD - 45 deg	PD	PD + 45 deg		Cell index	ND - 45 deg	ND	ND + 45 deg	ND - 45 deg	ND	ND + 45 deg
	1	0.825	0.775	0.775	0.4	0.425	0.25		1	1.575	1.475	1.5	0.25	0.35	0.3
	2	0.725	0.725	0.75	0.5	0.575	0.45		2	NaN	1.475	1.425	NaN	0.175	0.45
	3	0.4	0.375	0.575	0.525	0.675	0.45		3	1.425	1.4	1.425	0.25	0.375	0.275
	4	0.65	0.675	0.775	0.225	0.6	0.625		4	1.475	1.45	1.475	0.075	0.225	0.075
	5	0.65	0.5	0.525	0.8	0.9	0.85		5	1.425	1.375	1.3	0.175	0.275	0.275
	6	0.575	0.45	0.4	0.675	0.675	0.725		6	1.4	1.4	1.425	0.225	0.3	0.2
	7	0.85	0.775	0.7	0.325	0.5	0.4		7	NaN	1.45	1.425	NaN	0.15	0.15
	8	0.5	0.625	0.825	1	0.75	0.5		8	1.45	1.475	NaN	0.325	0.125	NaN
	9	0.375	0.525	0.675	0.675	0.8	0.675		9	1.425	1.5	NaN	0.275	0.3	NaN
	10	0.9	0.675	0.65	0.45	0.65	0.55		10	NaN	1.675	1.575	NaN	0.025	0.175
	11	0.6	0.65	0.725	0.725	0.65	0.55		11	1.45	1.45	1.45	0.175	0.1	0.275
	12	0.7	0.475	0.475	0.675	0.9	0.85		12	1.45	1.425	1.4	0.05	0.1	0.175
	13	0.45	0.575	0.7	0.55	0.65	0.65		13	1.4	1.4	1.45	0.25	0.275	0.2
	14	0.725	0.675	0.75	0.45	0.55	0.5		14	1.45	1.45	1.475	0.15	0.15	0.125
	15	0.7	0.575	0.6	0.75	0.975	0.95		15	1.45	1.4	1.425	0.25	0.35	0.425
	16	0.55	0.55	0.6	0.725	0.8	0.675		16	1.45	1.45	NaN	0.35	0.25	NaN
	17	0.85	0.875	0.825	0.725	0.725	0.7		18	1.4	1.375	1.4	0.55	0.6	0.525
	18	0.4	0.25	0.375	0.75	0.925	0.875		21	1.375	1.375	1.4	0.525	0.575	0.5
	20	0.55	0.3	0.55	1.125	1.475	0.925		23	1.375	1.4	1.425	0.575	0.375	0.275
	21	0.15	0.275	0.35	1.05	0.875	0.775		26	1.375	1.4	1.4	0.425	0.25	0.25
	22	0.7	0.7	0.7	0.725	0.75	0.725		27	1.4	1.4	1.4	0.525	0.575	0.5
	23	0.55	0.55	0.675	0.975	0.925	0.75		28	1.4	1.425	1.425	0.275	0.25	0.175
	24	0.425	0.525	0.625	1.05	1.025	0.975		29	1.4	1.35	1.4	0.5	0.6	0.575
	25	0.75	0.8	0.575	0.7	0.675	0.85		30	1.35	1.375	1.375	0.45	0.375	0.475
	32	0.675	0.325	0.35	0.75	1.025	1.225		31	1.45	1.375	1.375	0.35	0.525	0.525
	33	0.725	0.625	0.675	0.85	0.85	0.8		32	1.4	1.4	1.375	0.425	0.575	0.6
	34	0.7	0.875	0.925	0.6	0.425	0.4		33	1.425	1.425	1.4	0.225	0.2	0.1
	35	0.575	0.625	0.6	0.975	0.725	0.55		34	1.45	1.475	NaN	0.15	0.15	NaN
	36	0.65	0.525	0.725	0.85	0.975	0.725		35	1.425	1.425	1.425	0.15	0.2	0.1
	37	0.35	0.4	0.65	0.85	0.825	0.425		36	1.375	1.375	1.4	0.275	0.35	0.25
	38	0.625	0.5	0.625	0.7	0.9	0.8		37	1.375	1.35	1.35	0.25	0.35	0.375
	39	0.775	0.6	0.625	0.725	0.7	0.7		38	1.4	1.4	1.5	0.25	0.3	0.15
	40	0.6	0.6	0.6	0.75	0.8	0.75		39	1.425	1.425	1.425	0.175	0.1	0.075
	41	0.625	0.55	0.7	0.675	0.825	0.625		40	1.4	1.425	1.425	0.125	0.15	0.15
	42	0.825	0.6	0.45	0.425	0.7	0.7		41	1.425	1.425	1.45	0.175	0.25	0.175
	43	0.625	0.625	0.525	0.725	0.775	0.725		42	NaN	1.375	1.4	NaN	0.375	0.275
	44	0.675	0.625	0.675	0.8	0.775	0.425		43	1.45	1.425	1.425	0.225	0.3	0.3
	45	0.925	0.7	0.925	0.475	0.75	0.4		44	1.5	1.575	1.55	0.475	0.4	0.3
	46	0.675	0.475	0.325	0.75	1	1.125		45	NaN	1.45	1.45	NaN	0.1	0.175
	47	0.65	0.4	0.425	0.525	0.85	0.825		47	1.425	1.4	1.4	0.35	0.3	0.3
	49	0.475	0.4	0.2	0.65	0.725	0.825		48	1.425	1.425	1.425	0.225	0.25	0.125
	50	0.175	0.2	0.35	0.525	0.9	1.025		53	1.45	1.45	1.475	0.225	0.2	0.025
	51	0.725	0.625	0.675	0.85	0.85	0.8		55	1.475	NaN	NaN	0.15	NaN	NaN
	52	0.725	0.725	0.65	0.65	0.6	0.625		58	1.425	1.425	1.425	0.15	0.2	0.1
	54	0.75	0.45	0.625	0.575	0.9	0.6		59	1.4	1.4	1.375	0.325	0.475	0.275
	55	0.825	0.7	0.875	0.275	0.6	0.425		60	1.375	1.375	1.4	0.275	0.35	0.25
	56	0.65	0.7	0.75	0.8	0.775	0.75		61	1.4	1.425	1.4	0.2	0.275	0.15
	57	0.7	0.975	0.8	0.7	0.525	0.675		62	1.375	1.35	1.35	0.25	0.35	0.375
	58	0.55	0.625	0.6	1	0.825	0.55		63	1.4	1.375	1.425	0.525	0.55	0.35
	59	0.475	0.45	0.65	0.675	0.875	0.725		64	1.4	1.4	1.5	0.25	0.3	0.15
	60	0.65	0.525	0.725	0.85	0.975	0.725		66	1.45	1.425	1.45	0.075	0.1	0.05
	63	0.35	0.675	0.775	1.15	0.875	0.875		68	1.4	1.425	1.425	0.125	0.15	0.15
	64	0.625	0.6	0.625	0.7	0.8	0.8		71	1.45	1.45	1.525	0.125	0.175	0.025
	66	0.7	0.75	0.575	0.55	0.6	0.75		72	1.45	1.45	1.45	0.075	0.1	0.2
	67	0.575	0.725	0.85	0.8	0.6	0.5		73	1.45	1.45	NaN	0.075	0.125	NaN
	68	0.675	0.6	0.6	0.675	0.775	0.75		76	1.425	1.425	1.45	0.175	0.25	0.175
	69	0.275	0.375	0.25	1.025	0.825	0.95		79	1.45	1.45	1.425	0.45	0.425	0.3
	70	0.85	0.85	0.75	0.425	0.4	0.425		80	1.45	1.45	1.45	0.25	0.35	0.175
	71	0.625	0.55	0.725	0.45	0.55	0.6		81	1.6	1.45	NaN	0.075	0.45	NaN
	72	0.8	0.75	0.725	0.5	0.55	0.6		82	1.4	1.4	1.425	0.25	0.4	0.35
	73	0.775	0.75	0.775	0.6	0.7	0.575		83	1.4	1.375	1.55	0.45	0.25	0.05
	74	0.725	0.65	0.675	1.025	0.875	0.9		84	1.475	1.45	1.5	0.425	0.5	0.475
	75	0.65	0.65	0.825	0.725	0.775	0.625		85	1.525	1.525	1.5	0.3	0.225	0.125
	76	0.625	0.55	0.7	0.675	0.825	0.625		86	1.525	1.5	1.475	0.25	0.05	0.475
	77	0.75	0.9	0.9	0.625	0.575	0.6		87	1.375	1.4	1.425	0.375	0.275	0.05
	78	0.725	0.775	0.65	0.925	0.725	0.825		88	1.575	1.475	1.425	0.075	0.2	0.175
	79	0.65	0.6	0.675	0.525	0.6	0.45		89	1.425	1.425	1.4	0.225	0.25	0.25
	82	0.375	0.55	0.8	0.75	0.65	0.475		90	1.475	1.45	1.45	0.35	0.3	0.175
	83	0.2	0.45	0.6	1	0.725	0.6		91	1.525	1.475	1.6	0.225	0.375	0.025
	87	0.825	0.6	0.45	0.425	0.7	0.7
	88	0.85	0.775	0.8	0.55	0.5	0.475
	89	0.625	0.675	0.7	0.8	0.7	0.65
	90	0.675	0.6	0.425	0.725	0.7	0.8

## Sheet: C
	Full-field spiking response onset time and peak firing rate								Occlusion null response onset time and peak firing rate
		Onset time (s)			Peak firing rate (spikes/s)					Onset time (s)			Peak firing rate (spikes/s)
	Cell index	PD - 45 deg	PD	PD + 45 deg	PD - 45 deg	PD	PD + 45 deg		Cell index	PD - 45 deg	PD	PD + 45 deg	PD - 45 deg	PD	PD + 45 deg
	1	0.825	0.775	0.775	80	80	40		1	1.575	1.475	1.5	60	100	100
	2	0.725	0.725	0.75	60	60	60		2	NaN	1.475	1.425	20	40	100
	3	0.4	0.375	0.575	80	80	80		3	1.425	1.4	1.425	100	80	40
	4	0.65	0.675	0.775	60	80	80		4	1.475	1.45	1.475	40	80	40
	5	0.65	0.5	0.525	120	100	80		5	1.425	1.375	1.3	80	100	40
	6	0.575	0.45	0.4	66.6667	53.3333	53.3333		6	1.4	1.4	1.425	60	80	60
	7	0.85	0.775	0.7	60	80	80		7	NaN	1.45	1.425	26.6667	93.3333	80
	8	0.5	0.625	0.825	60	80	100		8	1.45	1.475	NaN	40	26.6667	13.3333
	9	0.375	0.525	0.675	60	60	60		9	1.425	1.5	NaN	60	40	20
	10	0.9	0.675	0.65	60	120	100		10	NaN	1.675	1.575	0	20	40
	11	0.6	0.65	0.725	80	80	80		11	1.45	1.45	1.45	100	120	60
	12	0.7	0.475	0.475	100	120	80		12	1.45	1.425	1.4	60	120	120
	13	0.45	0.575	0.7	53.3333	66.6667	53.3333		13	1.4	1.4	1.45	66.6667	80	40
	14	0.725	0.675	0.75	80	106.667	80		14	1.45	1.45	1.475	100	80	60
	15	0.7	0.575	0.6	93.3333	80	80		15	1.45	1.4	1.425	53.3333	66.6667	53.3333
	16	0.55	0.55	0.6	60	60	80		16	1.45	1.45	NaN	40	40	40
	17	0.85	0.875	0.825	126.667	120	106.667		18	1.4	1.375	1.4	100	133.333	100
	18	0.4	0.25	0.375	80	86.6667	60		21	1.375	1.375	1.4	120	133.333	86.6667
	20	0.55	0.3	0.55	100	106.667	106.667		23	1.375	1.4	1.425	66.6667	93.3333	86.6667
	21	0.15	0.275	0.35	120	113.333	86.6667		26	1.375	1.4	1.4	40	120	113.333
	22	0.7	0.7	0.7	100	113.333	93.3333		27	1.4	1.4	1.4	60	120	93.3333
	23	0.55	0.55	0.675	100	93.3333	73.3333		28	1.4	1.425	1.425	100	133.333	106.667
	24	0.425	0.525	0.625	100	86.6667	93.3333		29	1.4	1.35	1.4	120	113.333	106.667
	25	0.75	0.8	0.575	80	106.667	86.6667		30	1.35	1.375	1.375	120	126.667	93.3333
	32	0.675	0.325	0.35	106.667	106.667	93.3333		31	1.45	1.375	1.375	60	100	80
	33	0.725	0.625	0.675	53.3333	66.6667	80		32	1.4	1.4	1.375	40	93.3333	93.3333
	34	0.7	0.875	0.925	53.3333	53.3333	53.3333		33	1.425	1.425	1.4	53.3333	53.3333	80
	35	0.575	0.625	0.6	53.3333	80	66.6667		34	1.45	1.475	NaN	40	80	0
	36	0.65	0.525	0.725	66.6667	80	93.3333		35	1.425	1.425	1.425	106.667	106.667	80
	37	0.35	0.4	0.65	66.6667	93.3333	80		36	1.375	1.375	1.4	66.6667	80	26.6667
	38	0.625	0.5	0.625	93.3333	80	40		37	1.375	1.35	1.35	53.3333	93.3333	80
	39	0.775	0.6	0.625	93.3333	80	80		38	1.4	1.4	1.5	66.6667	80	26.6667
	40	0.6	0.6	0.6	80	93.3333	80		39	1.425	1.425	1.425	93.3333	93.3333	53.3333
	41	0.625	0.55	0.7	80	93.3333	80		40	1.4	1.425	1.425	80	120	80
	42	0.825	0.6	0.45	53.3333	93.3333	66.6667		41	1.425	1.425	1.45	93.3333	93.3333	66.6667
	43	0.625	0.625	0.525	53.3333	80	53.3333		42	NaN	1.375	1.4	13.3333	66.6667	106.667
	44	0.675	0.625	0.675	53.3333	66.6667	66.6667		43	1.45	1.425	1.425	53.3333	80	93.3333
	45	0.925	0.7	0.925	40	66.6667	80		44	1.5	1.575	1.55	53.3333	53.3333	40
	46	0.675	0.475	0.325	93.3333	106.667	80		45	NaN	1.45	1.45	13.3333	66.6667	40
	47	0.65	0.4	0.425	80	93.3333	66.6667		47	1.425	1.4	1.4	53.3333	106.667	106.667
	49	0.475	0.4	0.2	80	93.3333	106.667		48	1.425	1.425	1.425	66.6667	106.667	66.6667
	50	0.175	0.2	0.35	80	80	93.3333		53	1.45	1.45	1.475	53.3333	106.667	40
	51	0.725	0.625	0.675	53.3333	66.6667	80		58	1.425	1.425	1.425	106.667	106.667	80
	52	0.725	0.725	0.65	93.3333	120	120		59	1.4	1.4	1.375	93.3333	120	53.3333
	54	0.75	0.45	0.625	93.3333	80	93.3333		60	1.375	1.375	1.4	66.6667	80	26.6667
	55	0.825	0.7	0.875	53.3333	53.3333	53.3333		61	1.4	1.425	1.4	106.667	120	80
	56	0.65	0.7	0.75	80	80	80		62	1.375	1.35	1.35	53.3333	93.3333	80
	57	0.7	0.975	0.8	66.6667	80	93.3333		63	1.4	1.375	1.425	93.3333	106.667	53.3333
	58	0.55	0.625	0.6	53.3333	80	66.6667		64	1.4	1.4	1.5	66.6667	80	26.6667
	59	0.475	0.45	0.65	66.6667	93.3333	93.3333		66	1.45	1.425	1.45	66.6667	93.3333	40
	60	0.65	0.525	0.725	66.6667	80	93.3333		68	1.4	1.425	1.425	80	120	80
	63	0.35	0.675	0.775	106.667	120	106.667		71	1.45	1.45	1.525	93.3333	66.6667	26.6667
	64	0.625	0.6	0.625	93.3333	80	40		72	1.45	1.45	1.45	53.3333	53.3333	80
	66	0.7	0.75	0.575	66.6667	93.3333	53.3333		73	1.45	1.45	NaN	40	53.3333	13.3333
	67	0.575	0.725	0.85	60	80	80		76	1.425	1.425	1.45	93.3333	93.3333	66.6667
	68	0.675	0.6	0.6	100	100	100		79	1.45	1.45	1.425	66.6667	80	26.6667
	69	0.275	0.375	0.25	80	100	60		80	1.45	1.45	1.45	53.3333	80	66.6667
	70	0.85	0.85	0.75	60	80	80		81	1.6	1.45	NaN	26.6667	53.3333	13.3333
	71	0.625	0.55	0.725	80	80	53.3333		82	1.4	1.4	1.425	53.3333	106.667	66.6667
	72	0.8	0.75	0.725	66.6667	93.3333	66.6667		83	1.4	1.375	1.55	66.6667	53.3333	13.3333
	73	0.775	0.75	0.775	53.3333	66.6667	40		84	1.475	1.45	1.5	26.6667	53.3333	53.3333
	74	0.725	0.65	0.675	80	80	93.3333		85	1.525	1.525	1.5	40	53.3333	40
	75	0.65	0.65	0.825	93.3333	93.3333	80		86	1.525	1.5	1.475	80	80	53.3333
	76	0.625	0.55	0.7	80	93.3333	80		87	1.375	1.4	1.425	66.6667	106.667	26.6667
	77	0.75	0.9	0.9	80	120	80		88	1.575	1.475	1.425	26.6667	66.6667	40
	78	0.725	0.775	0.65	40	66.6667	66.6667		89	1.425	1.425	1.4	80	106.667	66.6667
	79	0.65	0.6	0.675	60	80	40		90	1.475	1.45	1.45	80	93.3333	66.6667
	82	0.375	0.55	0.8	80	100	80		91	1.525	1.475	1.6	53.3333	66.6667	13.3333
	83	0.2	0.45	0.6	80	60	80
	87	0.825	0.6	0.45	80	100	80
	88	0.85	0.775	0.8	100	100	100
	89	0.625	0.675	0.7	120	120	100
	90	0.675	0.6	0.425	120	120	80

## Sheet: D
		Full-field preferred direction (PD)		Occlusion null direction (ND)
		Mean spike count	Variance of spike count	Mean spike count	Variance of spike count
		0.166667	0.166667	1	0.4
		0.5	0.3	2.83333	0.166667
		0.5	0.3	3	0.8
		1.83333	1.36667	1.83333	0.166667
		1.66667	0.666667	1.5	0.3
		3	0.4	1.33333	0.266667
		2.83333	0.166667	0.166667	0.166667
		2.66667	0.266667	0.666667	0.266667
		2.5	0.7	0.5	0.3
		2.5	0.3	0.166667	0.166667
		2.83333	0.166667	0.333333	0.266667
		2.66667	0.266667	0.166667	0.166667
		2.83333	0.566667	0.166667	0.166667
		2.66667	0.666667	0.5	1.5
		2.5	0.3	2.16667	0.966667
		2	0.4	3.33333	0.266667
		2	0.4	2.83333	0.166667
		2	0.4	2.33333	0.266667
		1.83333	0.166667	1.5	0.3
		1.66667	0.266667	1.33333	0.266667
		1.5	0.3	1.16667	0.166667
		1.33333	0.266667	1.5	0.3
		1.33333	0.266667	0.833333	0.566667
		0.833333	0.166667	0.833333	0.166667
		0.833333	0.566667	0.833333	0.166667
		0.833333	0.166667	0.833333	0.166667
		0.666667	0.266667	0.666667	0.266667
		0.666667	0.266667	0.5	0.3
		0.333333	0.266667	0.833333	0.166667
		0.166667	0.166667	0.333333	0.266667
		0.166667	0.166667	0.666667	0.266667
		0.5	0.3	0.333333	0.266667
		1	0.4	0.666667	0.266667
		1.16667	0.566667	0.666667	0.266667
		0.833333	0.566667	1	0
		0.5	0.3	0.166667	0.166667
		0.333333	0.266667	0.333333	0.266667
		0.166667	0.166667	0.666667	0.266667
		0.166667	0.166667	0.166667	0.166667
		0.333333	0.266667	3	0
		0.333333	0.266667	2.83333	0.166667
		0.5	0.7	2	0.8
		1	0.4	1.66667	0.266667
		1.33333	0.266667	1.16667	0.166667
		1.5	0.3	1.33333	0.266667
		1.83333	0.966667	1.16667	0.166667
		1.83333	0.166667	1.16667	0.566667
		2	0	1	0.4
		2.16667	0.166667	1	0
		1.83333	0.966667	1	0.8
		1.33333	1.06667	0.833333	0.566667
		1	0.8	0.666667	0.266667
		1.16667	0.966667	0.666667	0.666667
		0.833333	0.566667	0.666667	0.266667
		1	0.8	0.5	0.3
		1	0.8	0.666667	0.266667
		0.833333	0.566667	0.166667	0.166667
		0.666667	0.266667	0.333333	0.266667
		0.5	0.3	0.333333	0.266667
		0.833333	0.166667	0.5	0.3
		0.833333	0.566667	0.333333	0.266667
		0.833333	0.566667	0.166667	0.166667
		0.833333	0.166667	2.66667	0.666667
		0.333333	0.266667	3.33333	0.666667
		0.5	0.3	2.33333	0.266667
		0.5	0.3	1.66667	0.266667
		0.333333	0.266667	1.16667	0.166667
		0.166667	0.166667	0.666667	0.266667
		0.333333	0.266667	0.5	0.3
		0.166667	0.166667	0.333333	0.266667
		0.166667	0.166667	0.333333	0.266667
		0.166667	0.166667	0.166667	0.166667
		0.166667	0.166667	0.166667	0.166667
		0.833333	0.166667	0.166667	0.166667
		0.666667	0.266667	0.833333	0.566667
		0.5	0.3	2.33333	0.266667
		0.5	0.3	2.33333	0.266667
		0.333333	0.266667	1.66667	0.266667
		0.5	0.3	1.83333	0.166667
		0.333333	0.266667	1	0
		0.166667	0.166667	0.833333	0.166667
		0.166667	0.166667	0.5	0.3
		0.333333	0.266667	1.16667	0.166667
		0.333333	0.266667	0.333333	0.266667
		0.5	0.3	0.333333	0.266667
		0.166667	0.166667	0.333333	0.266667
		0.833333	0.166667	0.166667	0.166667
		0.5	0.3	0.166667	0.166667
		0.833333	0.166667	0.166667	0.166667
		0.833333	0.166667	0.166667	0.166667
		1	0.4	0.5	1.5
		1	0	1.83333	0.566667
		1	0	2.66667	0.666667
		1.16667	0.166667	2.83333	0.566667
		1.16667	0.166667	2.33333	0.666667
		1.83333	0.166667	2	0
		0.833333	0.166667	1.83333	0.166667
		1	0	1.16667	0.166667
		1.5	0.3	1.66667	0.266667
		1.66667	0.266667	1.33333	0.266667
		1	0	0.5	0.3
		1.33333	0.666667	1.16667	0.166667
		1.5	0.3	0.833333	0.166667
		1.16667	0.166667	1	0.8
		1.66667	0.266667	0.5	0.3
		1.16667	0.166667	0.333333	0.266667
		1.5	0.3	0.833333	1.36667
		0.833333	0.566667	0.166667	0.166667
		0.833333	0.566667	0.166667	0.166667
		0.666667	0.266667	0.333333	0.666667
		0.5	0.3	0.166667	0.166667
		0.666667	0.266667	0.333333	0.266667
		0.166667	0.166667	0.666667	0.266667
		0.333333	0.266667	2.83333	0.566667
		0.166667	0.166667	2.33333	1.06667
		0.166667	0.166667	3.16667	0.566667
		0.166667	0.166667	2.83333	0.166667
		0.166667	0.166667	2.16667	0.166667
		0.166667	0.166667	1.83333	0.166667
		0.5	0.3	1.83333	0.166667
		0.333333	0.266667	1.66667	0.266667
		0.333333	0.266667	1.16667	0.166667
		0.166667	0.166667	0.833333	0.566667
		0.5	0.3	1	0.4
		0.5	0.3	0.5	0.7
		0.666667	0.266667	0.666667	0.666667
		0.666667	0.666667	0.166667	0.166667
		2	0.8	0.166667	0.166667
		1.33333	1.06667	0.333333	0.266667
		1.66667	0.266667	0.166667	0.166667
		1.83333	0.566667	0.333333	0.266667
		2	0.4	2.83333	0.166667
		2.33333	0.266667	3.33333	0.266667
		2	0.8	2.66667	0.266667
		2.16667	0.566667	3	0.4
		2.33333	0.666667	2	0
		2.5	0.3	2.5	0.3
		2.66667	0.266667	1.16667	0.166667
		2.16667	0.566667	1.33333	0.266667
		2.66667	0.266667	1	0.4
		2.33333	0.666667	1.16667	0.166667
		2.16667	0.166667	0.666667	0.266667
		2.33333	0.266667	0.333333	0.266667
		2.5	0.3	0.833333	0.166667
		2.5	0.3	0.333333	0.266667
		2	0.4	0.166667	0.166667
		2.33333	0.666667	0.5	0.7
		1.66667	0.666667	0.166667	0.166667
		1.66667	1.06667	0.5	0.7
		1.66667	0.266667	0.166667	0.166667
		1.16667	0.566667	0.166667	0.166667
		1.33333	1.06667	1	1.6
		1	0.4	2	0
		1	0.8	2.5	0.3
		0.666667	0.266667	2.16667	0.166667
		0.666667	0.266667	2	0
		0.666667	0.266667	1.5	0.3
		0.166667	0.166667	1.5	0.3
		0.333333	0.266667	1.16667	0.166667
		0.333333	0.266667	1.33333	0.266667
		0.333333	0.266667	0.833333	0.566667
		0.166667	0.166667	0.666667	0.266667
		0.166667	0.166667	1	0.8
		0.166667	0.166667	0.333333	0.266667
		0.166667	0.166667	0.333333	0.266667
		0.166667	0.166667	0.5	0.3
		0.166667	0.166667	0.333333	0.266667
		0.166667	0.166667	0.5	0.3
		0.166667	0.166667	0.333333	0.266667
		0.166667	0.166667	0.166667	0.166667
		0.166667	0.166667	0.166667	0.166667
		0.166667	0.166667
		0.666667	0.266667
		1.16667	0.166667
		0.666667	0.266667
		1.5	0.3
		1.5	0.3
		1.33333	0.266667
		1.33333	0.266667
		1.66667	0.266667
		2	0.8
		2	0.4
		2.16667	0.566667
		2	0.4
		1.83333	0.566667
		2.83333	0.566667
		2	0
		2.16667	0.566667
		2.83333	0.166667
		2.66667	1.06667
		2.5	0.3
		2.5	0.7
		1.83333	0.566667
		2.33333	0.666667
		2	0.8
		2.16667	0.566667
		2	1.2
		1.16667	0.566667
		1.5	0.7
		1	0.8
		1.16667	0.566667
		1	0
		0.666667	0.266667
		0.5	0.3
		0.333333	0.266667
		0.166667	0.166667
		0.833333	0.566667
		1.16667	0.166667
		1.66667	0.266667
		1.83333	0.166667
		2	0
		2	0
		1.83333	0.166667
		2	0.4
		2	0
		2.16667	0.166667
		2	0
		2.83333	0.166667
		1.16667	0.966667
		1.16667	2.16667
		0.166667	0.166667
		0.5	1.5
		0.333333	0.266667
		0.333333	0.266667
		0.333333	0.666667
		0.166667	0.166667
		0.166667	0.166667
		0.333333	0.266667
		0.833333	0.166667
		0.333333	0.266667
		0.166667	0.166667
		0.5	0.3
		0.333333	0.266667
		0.166667	0.166667
		0.666667	0.266667
		0.166667	0.166667
		0.666667	0.266667
		0.833333	0.566667
		1.16667	0.566667
		1.5	0.3
		1.66667	0.266667
		1.66667	0.266667
		1.66667	0.266667
		1.66667	0.266667
		2.16667	0.166667
		1.5	0.3
		2.33333	0.266667
		2.33333	0.266667
		1.66667	0.266667
		1.83333	0.166667
		1.83333	0.166667
		1.66667	0.266667
		0.666667	0.666667
		1	0.8
		0.666667	0.666667
		0.5	0.7
		0.166667	0.166667
		0.833333	0.566667
		0.833333	0.566667
		0.833333	0.566667
		0.166667	0.166667
		0.333333	0.266667
		0.333333	0.266667
		0.333333	0.266667
		0.333333	0.266667
		0.166667	0.166667
		0.166667	0.166667
		0.166667	0.166667
		0.166667	0.166667
		0.166667	0.166667
		0.5	0.3
		0.5	0.3
		0.333333	0.266667
		1.16667	0.166667
		1	0.4
		1.16667	0.566667
		1.33333	0.266667
		1.16667	0.166667
		1.5	0.3
		1.66667	0.266667
		1.66667	0.266667
		2	0
		1.83333	0.166667
		1.83333	0.566667
		2.16667	0.566667
		2.16667	0.166667
		1.83333	0.166667
		1.33333	0.666667
		1.83333	1.36667
		1.16667	0.966667
		1.33333	2.26667
		1	1.2
		0.833333	0.966667
		1	0.8
		1	1.2
		0.833333	0.966667
		0.833333	0.166667
		0.833333	0.566667
		0.833333	0.566667
		0.833333	0.166667
		1	0.4
		1.16667	0.166667
		1	0
		1	0
		0.5	0.3
		0.833333	0.166667
		0.833333	0.166667
		0.666667	0.266667
		0.333333	0.266667
		0.166667	0.166667
		0.5	0.3
		0.166667	0.166667
		0.166667	0.166667
		0.166667	0.166667
		0.166667	0.166667
		0.166667	0.166667
		0.666667	0.666667
		0.333333	0.266667
		0.666667	0.266667
		0.666667	0.666667
		1.83333	0.166667
		1.83333	0.166667
		1.5	0.3
		1.83333	0.166667
		1.83333	0.166667
		1.33333	0.266667
		1.66667	0.266667
		1.83333	0.166667
		2	0.4
		2.66667	0.266667
		1.66667	0.266667
		2.33333	0.266667
		2.16667	0.166667
		1.5	0.3
		1.5	0.3
		1.33333	0.266667
		1.33333	0.266667
		1.33333	0.666667
		0.666667	0.666667
		0.666667	0.266667
		0.5	0.7
		0.333333	0.266667
		0.166667	0.166667
		0.333333	0.266667
		0.5	0.3
		0.666667	0.266667
		1	0
		1.33333	0.266667
		1.5	0.3
		1.83333	0.166667
		1.83333	0.166667
		1.66667	0.266667
		1.5	0.3
		1.66667	0.266667
		1.83333	0.566667
		2	0
		2.16667	0.566667
		2.16667	0.166667
		1.83333	0.566667
		1.66667	0.266667
		1.66667	0.266667
		0.833333	0.966667
		0.666667	0.666667
		1	0.4
		1	0.4
		0.666667	0.266667
		0.666667	0.666667
		0.5	0.3
		0.5	0.3
		0.833333	0.166667
		0.666667	0.666667
		0.666667	0.266667
		1	0.4
		0.833333	0.566667
		0.333333	0.266667
		0.333333	0.266667
		0.333333	0.266667

## Sheet: G
	Histogram of circular variance (tuning width)
	Bin edge	0.184	0.232	0.28	0.328	0.376	0.424	0.472	0.52	0.568	0.616	0.664	0.712	0.76	0.808
	Cell count	2	0	2	5	4	7	12	9	10	8	8	2	1	3
	Parameters of Gaussian fit
	Mean	0.519538
	Standard deviation	0.135702

## Sheet: H
	Tuning curves normalized by peak and width
	Cell index	Deviation from preferred direction (PD)								Normalized mean spike count
	1	-234.385	-175.789	-117.192	-58.5962	0	58.5962	117.192	175.789	0.0208333	0.0208333	0.479167	0.875	1	0.25	0	0.0416667
	2	-164.875	-123.656	-82.4376	-41.2188	0	41.2188	82.4376	123.656	0.22549	0.127451	0.372549	0.862745	1	0.852941	0.539216	0.254902
	3	-162.712	-122.034	-81.3558	-40.6779	0	40.6779	81.3558	122.034	0.1375	0.2375	0.5875	0.65	1	0.7375	0.4625	0.1375
	4	-141.761	-106.321	-70.8805	-35.4403	0	35.4403	70.8805	106.321	0.504854	0.368932	0.485437	0.786408	1	0.815534	0.699029	0.61165
	5	-146.017	-109.513	-73.0083	-36.5042	0	36.5042	73.0083	109.513	0.417647	0.588235	0.852941	0.952941	1	0.929412	0.470588	0.370588
	6	-164.174	-123.131	-82.0871	-41.0435	0	41.0435	82.0871	123.131	0.177215	0.392405	0.85443	1	0.949367	0.987342	0.265823	0.196203
	7	-149.385	-112.039	-74.6925	-37.3463	0	37.3463	74.6925	112.039	0.382716	0.45679	0.493827	0.925926	1	0.962963	0.703704	0.271605
	8	-155.597	-116.697	-77.7983	-38.8991	0	38.8991	77.7983	116.697	0.241573	0.292135	0.601124	1	0.94382	0.741573	0.550562	0.275281
	9	-169.876	-127.407	-84.9378	-42.4689	0	42.4689	84.9378	127.407	0.166667	0.0873016	0.174603	0.825397	1	0.960317	0.97619	0.468254
	10	-140.477	-105.358	-70.2385	-35.1193	0	35.1193	70.2385	105.358	0.572464	0.731884	0.913043	0.804348	1	0.978261	0.586957	0.311594
	11	-156.533	-117.4	-78.2667	-39.1333	0	39.1333	78.2667	117.4	0.226562	0.234375	0.578125	0.9375	1	0.734375	0.421875	0.367188
	12	-149.037	-111.778	-74.5186	-37.2593	0	37.2593	74.5186	111.778	0.284884	0.377907	0.633721	0.732558	0.872093	1	0.645349	0.30814
	13	-155.981	-116.986	-77.9907	-38.9954	0	38.9954	77.9907	116.986	0.261194	0.186567	0.186567	0.88806	1	0.738806	0.671642	0.589552
	14	-167.725	-125.794	-83.8627	-41.9314	0	41.9314	83.8627	125.794	0.186603	0.110048	0.425837	0.904306	1	0.942584	0.497608	0.287081
	15	-154.819	-116.115	-77.4097	-38.7048	0	38.7048	77.4097	116.115	0.20904	0.316384	0.672316	0.813559	1	0.830508	0.548023	0.299435
	16	-143.002	-107.252	-71.5011	-35.7506	0	35.7506	71.5011	107.252	0.307018	0.54386	0.850877	0.921053	1	0.991228	0.605263	0.622807
	17	-180.244	-135.183	-90.1219	-45.061	0	45.061	90.1219	135.183	0.0267559	0.190635	0.695652	0.832776	1	0.819398	0.424749	0.0367893
	18	-181.083	-135.812	-90.5415	-45.2708	0	45.2708	90.5415	135.812	0.115578	0.110553	0.276382	0.773869	1	0.80402	0.321608	0.135678
	20	-176.57	-132.427	-88.2849	-44.1425	0	44.1425	88.2849	132.427	0.0454545	0.117647	0.438503	0.906417	1	0.895722	0.620321	0.197861
	21	-181.51	-136.133	-90.7552	-45.3776	0	45.3776	90.7552	136.133	0.0860534	0.11276	0.451039	1	0.985163	0.759644	0.317507	0.151335
	22	-166.646	-124.984	-83.3229	-41.6615	0	41.6615	83.3229	124.984	0.02	0.22	0.82	0.82	0.88	1	0.585	0.16
	23	-188.695	-141.521	-94.3476	-47.1738	0	47.1738	94.3476	141.521	0.0956938	0.124402	0.770335	0.933014	1	0.741627	0.143541	0.076555
	24	-177.452	-133.089	-88.7261	-44.3631	0	44.3631	88.7261	133.089	0.00649351	0.25974	0.737013	1	0.896104	0.834416	0.503247	0.025974
	25	-158.024	-118.518	-79.012	-39.506	0	39.506	79.012	118.518	0.0775194	0.209302	0.635659	0.744186	0.852713	0.976744	1	0.391473
	32	-159.642	-119.731	-79.8208	-39.9104	0	39.9104	79.8208	119.731	0.178082	0.424658	0.445205	0.80137	0.945205	1	0.506849	0.150685
	33	-171.433	-128.575	-85.7164	-42.8582	0	42.8582	85.7164	128.575	0.0526316	0.136842	0.568421	0.810526	1	0.989474	0.757895	0.2
	34	-194.381	-145.786	-97.1904	-48.5952	0	48.5952	97.1904	145.786	0	0.05	0.333333	1	0.733333	0.666667	0.383333	0.0666667
	35	-193.732	-145.299	-96.8659	-48.433	0	48.433	96.8659	145.299	0.056338	0.084507	0.295775	0.957746	1	0.830986	0.43662	0.0704225
	36	-211.223	-158.417	-105.611	-52.8057	0	52.8057	105.611	158.417	0.0862069	0.0172414	0.112069	0.724138	1	0.715517	0.293103	0.0603448
	37	-158.175	-118.631	-79.0874	-39.5437	0	39.5437	79.0874	118.631	0.195402	0.252874	0.747126	0.770115	1	0.747126	0.448276	0.252874
	38	-218.638	-163.979	-109.319	-54.6596	0	54.6596	109.319	163.979	0.0820896	0.0970149	0.38806	0.835821	1	0.38806	0	0.0223881
	39	-156.5	-117.375	-78.2498	-39.1249	0	39.1249	78.2498	117.375	0.260504	0.277311	0.487395	0.705882	1	0.94958	0.621849	0.294118
	40	-188.55	-141.413	-94.2752	-47.1376	0	47.1376	94.2752	141.413	0.0769231	0.0769231	0.222222	0.760684	1	0.871795	0.470085	0.136752
	41	-189.081	-141.811	-94.5407	-47.2704	0	47.2704	94.5407	141.811	0.0530973	0.0265487	0.212389	0.814159	1	0.867257	0.530973	0.20354
	42	-226.077	-169.558	-113.039	-56.5193	0	56.5193	113.039	169.558	0.03	0.04	0.2	0.31	1	0.94	0.23	0
	43	-188.476	-141.357	-94.2378	-47.1189	0	47.1189	94.2378	141.357	0.0625	0.0416667	0.479167	0.552083	1	0.677083	0.270833	0.104167
	44	-176.433	-132.325	-88.2164	-44.1082	0	44.1082	88.2164	132.325	0.193548	0.11828	0.258065	0.655914	1	0.483871	0.0322581	0.193548
	45	-188.471	-141.353	-94.2356	-47.1178	0	47.1178	94.2356	141.353	0.140845	0.056338	0.0985915	0.394366	1	0.732394	0.507042	0.225352
	46	-157.515	-118.137	-78.7577	-39.3789	0	39.3789	78.7577	118.137	0.229508	0.300546	0.344262	0.579235	1	0.825137	0.497268	0.256831
	47	-204.683	-153.512	-102.341	-51.1707	0	51.1707	102.341	153.512	0.0625	0.0625	0.0446429	0.508929	1	0.821429	0.526786	0.116071
	49	-233.654	-175.241	-116.827	-58.4136	0	58.4136	116.827	175.241	0.00990099	0.00990099	0.19802	0.762376	1	0.980198	0.227723	0
	50	-176.464	-132.348	-88.2319	-44.116	0	44.116	88.2319	132.348	0.141593	0.0884956	0.20354	0.654867	1	0.982301	0.734513	0.327434
	51	-174.377	-130.783	-87.1887	-43.5944	0	43.5944	87.1887	130.783	0.0421053	0.105263	0.568421	0.8	1	0.989474	0.757895	0.189474
	52	-166.082	-124.562	-83.0412	-41.5206	0	41.5206	83.0412	124.562	0.176991	0.238938	0.495575	0.849558	1	0.884956	0.442478	0.150442
	54	-177.327	-132.996	-88.6637	-44.3318	0	44.3318	88.6637	132.996	0.155963	0.229358	0.33945	0.614679	1	0.788991	0.183486	0.0550459
	55	-194.381	-145.786	-97.1904	-48.5952	0	48.5952	97.1904	145.786	0.0666667	0	0.05	0.333333	1	0.733333	0.666667	0.383333
	56	-168.638	-126.479	-84.3192	-42.1596	0	42.1596	84.3192	126.479	0.0480769	0.317308	0.721154	0.971154	1	0.961538	0.586538	0.115385
	57	-161.493	-121.12	-80.7465	-40.3732	0	40.3732	80.7465	121.12	0	0.195122	0.621951	0.890244	1	0.914634	0.768293	0.47561
	58	-196.264	-147.198	-98.1319	-49.0659	0	49.0659	98.1319	147.198	0.0506329	0.0759494	0.265823	0.873418	1	0.78481	0.392405	0.0632911
	59	-183.57	-137.677	-91.7849	-45.8924	0	45.8924	91.7849	137.677	0.12963	0.0833333	0.138889	0.546296	1	0.935185	0.481481	0.222222
	60	-212.104	-159.078	-106.052	-53.0261	0	53.0261	106.052	159.078	0.0833333	0.0166667	0.108333	0.725	1	0.7	0.283333	0.0583333
	63	-161.012	-120.759	-80.5062	-40.2531	0	40.2531	80.5062	120.759	0.0765306	0.27551	0.852041	1	0.862245	0.668367	0.505102	0.260204
	64	-217.327	-162.995	-108.664	-54.3318	0	54.3318	108.664	162.995	0.0859375	0.101562	0.40625	0.867188	1	0.398438	0	0.0234375
	66	-199.133	-149.35	-99.5664	-49.7832	0	49.7832	99.5664	149.35	0.0449438	0.168539	0.123596	0.764045	1	0.865169	0.382022	0.0337079
	67	-164.08	-123.06	-82.0399	-41.0199	0	41.0199	82.0399	123.06	0.0909091	0.2	0.581818	1	0.909091	0.709091	0.563636	0.2
	68	-182.226	-136.67	-91.1131	-45.5565	0	45.5565	91.1131	136.67	0.101124	0.101124	0.213483	0.786517	1	0.921348	0.483146	0.146067
	69	-165.571	-124.178	-82.7855	-41.3927	0	41.3927	82.7855	124.178	0.162162	0.337838	0.486486	0.959459	1	0.783784	0.324324	0.175676
	70	-166.441	-124.831	-83.2204	-41.6102	0	41.6102	83.2204	124.831	0.047619	0.214286	0.595238	0.761905	0.809524	1	0.690476	0.0952381
	71	-199.238	-149.429	-99.6192	-49.8096	0	49.8096	99.6192	149.429	0	0.0151515	0.424242	0.969697	1	0.712121	0.333333	0.136364
	72	-178.117	-133.587	-89.0583	-44.5292	0	44.5292	89.0583	133.587	0.0657895	0.144737	0.697368	0.881579	1	0.815789	0.368421	0.0657895
	73	-296.903	-222.677	-148.451	-74.2257	0	74.2257	148.451	222.677	0	0	0.047619	0.666667	1	0.666667	0.015873	0
	74	-163.425	-122.569	-81.7126	-40.8563	0	40.8563	81.7126	122.569	0.112903	0.209677	0.387097	0.854839	0.895161	1	0.75	0.306452
	75	-182.25	-136.688	-91.1251	-45.5625	0	45.5625	91.1251	136.688	0.0336134	0.0336134	0.546218	0.92437	1	0.781513	0.495798	0.184874
	76	-189.709	-142.281	-94.8543	-47.4272	0	47.4272	94.8543	142.281	0.0517241	0.0258621	0.206897	0.793103	1	0.844828	0.517241	0.198276
	77	-181.532	-136.149	-90.7662	-45.3831	0	45.3831	90.7662	136.149	0	0.308511	0.606383	1	0.87234	0.829787	0.351064	0
	78	-168.813	-126.609	-84.4063	-42.2032	0	42.2032	84.4063	126.609	0.0147059	0.102941	0.397059	0.838235	1	0.911765	0.897059	0.514706
	79	-294.42	-220.815	-147.21	-73.605	0	73.605	147.21	220.815	0	0	0.111111	0.574074	1	0.425926	0	0
	82	-203.444	-152.583	-101.722	-50.861	0	50.861	101.722	152.583	0	0	0.409639	1	0.819277	0.554217	0.240964	0.0963855
	83	-197.092	-147.819	-98.5458	-49.2729	0	49.2729	98.5458	147.819	0.0285714	0	0.0285714	1	0.785714	0.514286	0.271429	0.214286
	87	-215.189	-161.391	-107.594	-53.7971	0	53.7971	107.594	161.391	0.0379747	0.0506329	0.202532	0.392405	0.949367	1	0.291139	0
	88	-218.351	-163.763	-109.175	-54.5877	0	54.5877	109.175	163.763	0	0	0.365079	0.984127	1	0.793651	0.269841	0
	89	-171.791	-128.843	-85.8956	-42.9478	0	42.9478	85.8956	128.843	0.104762	0.2	0.561905	1	0.895238	0.761905	0.419048	0.114286
	90	-179.737	-134.803	-89.8684	-44.9342	0	44.9342	89.8684	134.803	0.126316	0.294737	0.547368	0.936842	1	0.747368	0.105263	0.0947368

## Sheet: I
		Full-Field Preferred response number of spikes							Occlusion Null response, number of spikes
	Bar Speed	330	660	1320	1980	2640		Bar Speed	330	660	1320	1980	2640
		47.6	28	16.1	8.4	8.4			9.7	8	5.7	5.3	5.3
		39.9	22.6	14	10.9	8			10.7	6.3	4.7	3	3.3
		22.7	29.1	17.4	11.8	6			11	15.7	8	5.3	8
		41.5	17.1	11.2	8	5.9			20.5	14.3	8.3	3.3	5
		15	23.3	10.4	5.8	5.5			20.3	15.7	8.7	6	4
		22.6	21.4	12	8.6	6.6			10	7.7	5.3	10	5
		32.7		12.2	9.7	7			15.3	11	9.3	4.3	4.3
		28.7		13.2	11.9	5.1			12	6	8.3	4.7
		33.5		11.3	8.6				11	10.7	6.7	5.7
									10	6	5
									9.7	7.7	4
	Mean	31.6	23.6	13.1	9.3	6.6			14.5	6.3	8
	std error	3.48	1.8	0.79	0.66	0.42			24	15.7
									12
									13
									7.5
									12.5
								Mean	13.2	10.1	6.8	5.3	5
								Std error	1.1	1.1	0.5	0.7	0.6

## Sheet: J
		Preferred Onset distance in microns							Occlusion Null Onset distance in microns
	Bar Speed	330	660	1320	1980	2640		Bar Speed	330	660	1320	1980	2640
		176	264	352	330	462			146.3	182.6	189.2	278.3	334.4
		198	242	341	412.5	462			138.05	166.1	222.2	228.8	268.4
		162.3	165	275	313.5	396			129.8	149.6	189.2	228.8	268.4
		159.5	187	231	297	484			129.8	166.1	189.2	278.3	400.4
		145.8	242	352	412.5	330			129.8	166.1	189.2	228.8	334.4
		184.3	176	275	280.5	418			146.3	182.6	255.2	228.8	334.4
		165	220	308	313.5	330			171.05	215.6	321.2	327.8	334.4
		198	220	187	247.5	374			138.05	166.1	189.2	278.3
		63.3	236.5	231	297	330			138.05	166.1	189.2	278.3
		189.8	203.5	286	313.5	374			138.05	166.1	222.2
		178.8	181.5	308	346.5	440			146.3	182.6	189.2
		187	319	242	396	429			138.05	149.6	189.2
		145.8	214.5	253	297	330			138.05	149.6
		123.8	176	396	313.5				146.3
		209	187	363	470.3				138.05
		169.1	198	264	297				138.05
		145.8	236.5	253					138.05
		121	143	319
		173.3	154	242
		206.3		264
		110
		123.8
		206.3
		193.9
		220
	mean	166.2	208.7	287.1	333.6	396.8			140.5	169.9	211.2	261.8	325
	std error	7.4	9.7	12	14.8	15.7			2.3	5	11.7	11.7	17.2

## Sheet: K
		Full-field Normalized preferred response duration							Occlusion Normalized null response duration
	Bar Speed	330	660	1320	1980	2640		Bar Speed	330	660	1320	1980	2640
		1	0.429	0.204	0.13	0.061			1	0.333	0.833	0.333	0.333
		1	0.663	0.253	0.112	0.063			1	0.417	0.167	0.429	0.333
		1	0.634	0.268	0.207	0.164			1	1.375	0.625	0.375	0.385
		1	0.564	0.4	0.273	0.058			1	0.571	0.381	0.182	0.4
		1	0.506	0.241	0.126	0.111			1	0.591	0.227	0.167	0.143
		1	0.542	0.222	0.208	0.099			1	0.917	0.417	0.615	0.333
		1		0.254	0.197	0.093			1	0.423	0.346	0.3	0.167
		1		0.248	0.163				1	0.571	0.571	0.286
									1	1	0.5	0.667
									1	0.375	0.182
									1	0.727	0.333
									1	0.583	0.539
									1	1.308
Mean		1	0.556	0.261	0.177	0.093			1	0.707	0.427	0.373	0.299
std error			0.035	0.021	0.019	0.014				0.095	0.057	0.058	0.039

## Sheet: L
	Difference in Onset times (IPSC-EPSC) in seconds	Spiking full-field DSI
	0.043	0.683
	0.505	0.927
	-0.194	0.543
	-0.336	0.433
	0.299	0.9
	0.078	1
	0.179	0.831
	-0.046	0.673
	0.036	0.826
	0.32	1
	0.016	0.75
	-0.479	0.548
	-0.055	0.609
	0.167	0.982
	0.249	0.91
	0.431	0.927
	0.18	0.959
	0.479	1
	0.038	0.842
	0.137	0.938
	-0.566	0.324
	0.065	0.547
