# Supplementary material for: Spatially displaced excitation contributes to the encoding of interrupted motion by a retinal direction-selective circuit
Source: eLife journal article supplement (doi:10.7554/elife.68181), 2021-06-07

**A**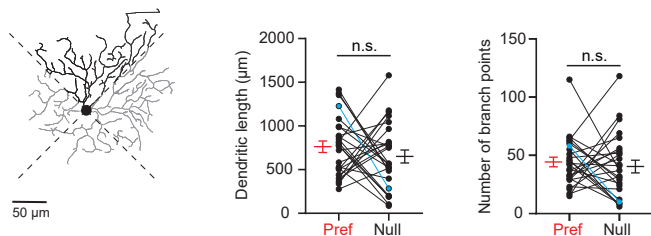**B**

Normalized Off dendritic length

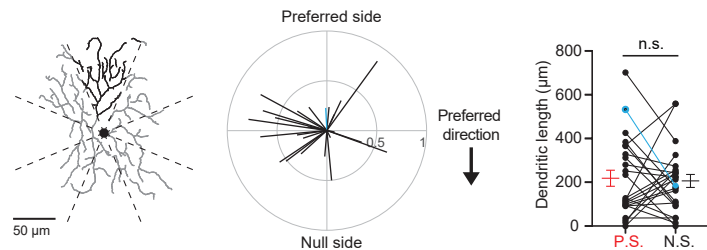**C**

Normalized Off number of branch points

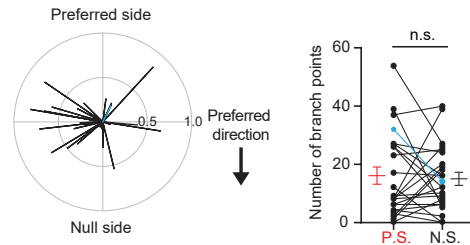**D**

Direction of Off EPSC displacement

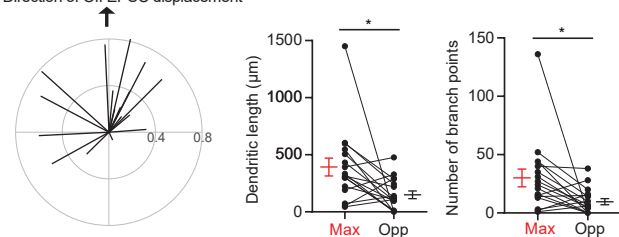**E**

Off

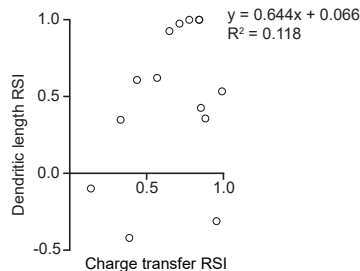

Supplement: supp [file elife-68181-supp-v1.zip]
