# Supplementary figures and images for: Spatially displaced excitation contributes to the encoding of interrupted motion by a retinal direction-selective circuit
Source: eLife journal article supplement (doi:10.7554/elife.68181), 2021-06-07

**A**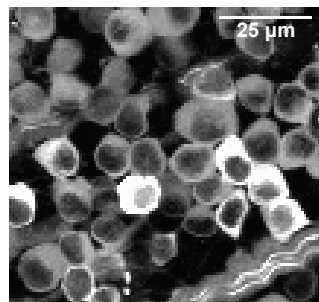**B**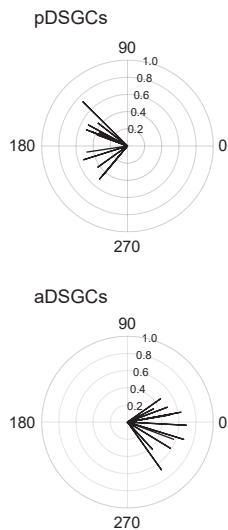**C**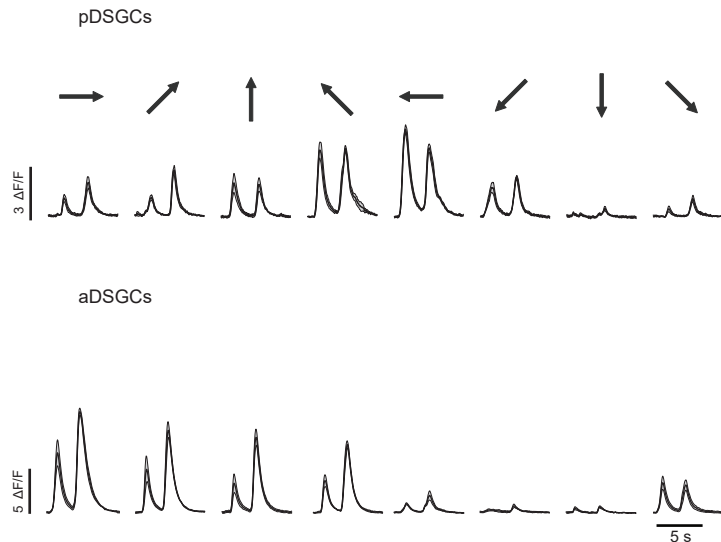**D**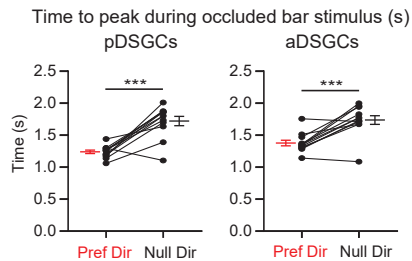

Supplement: supp [file elife-68181-supp-v1.zip]

On spiking response

Off spiking response

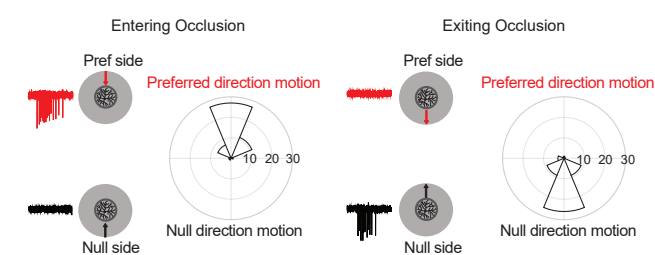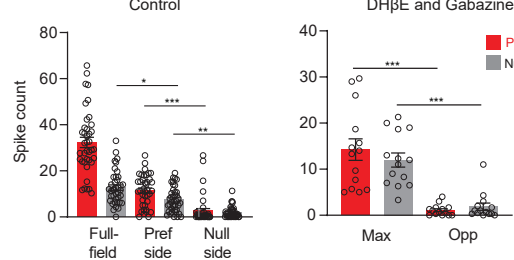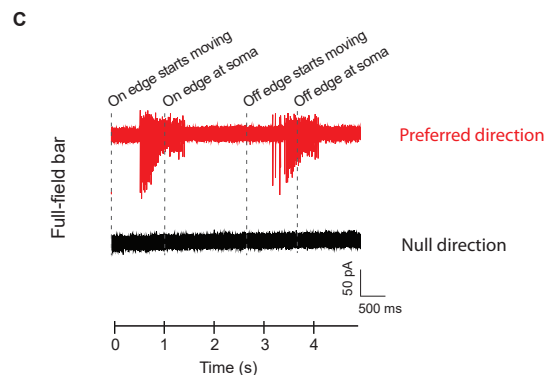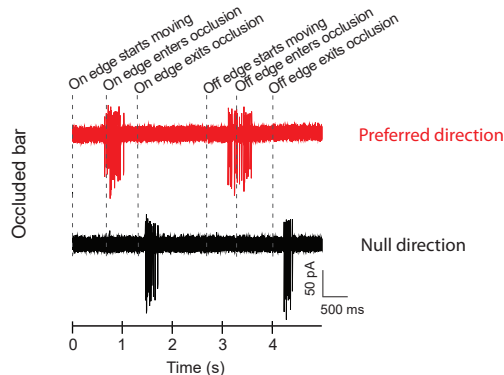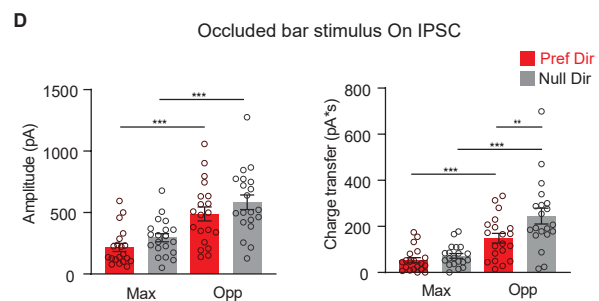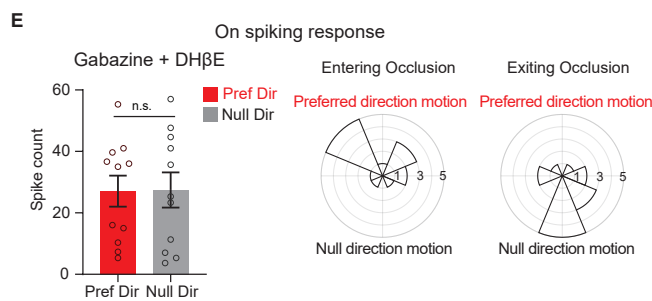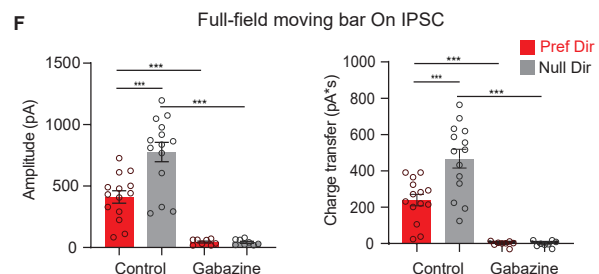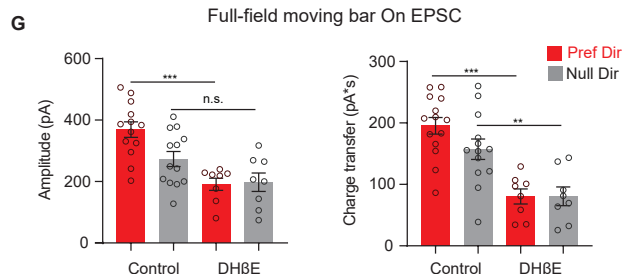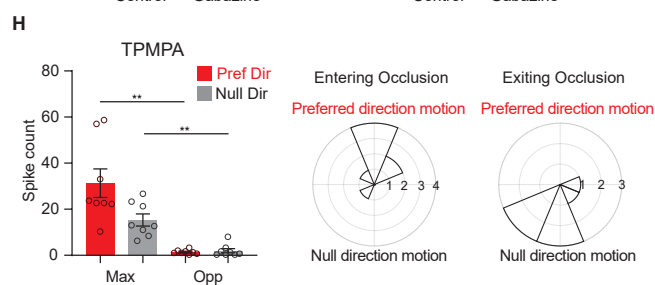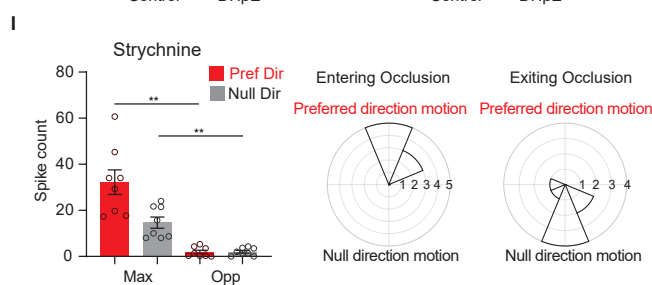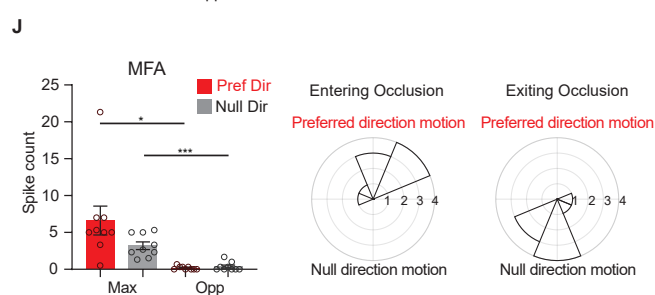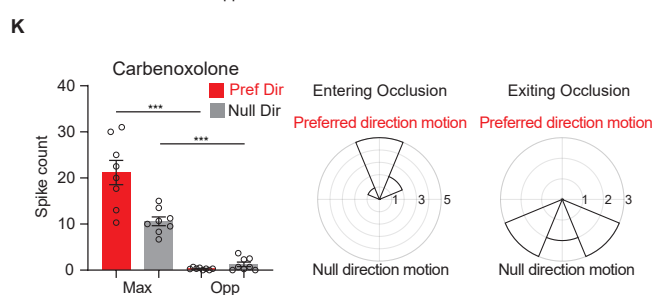

Supplement: supp [file elife-68181-supp-v1.zip]

**A**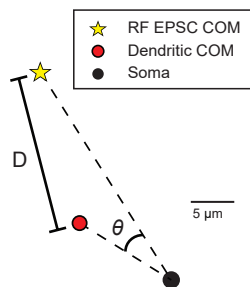**B**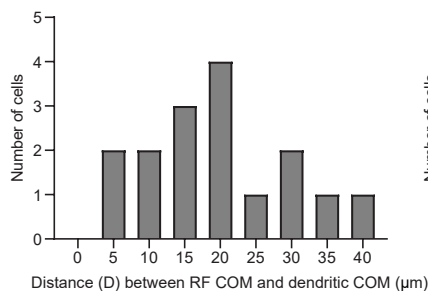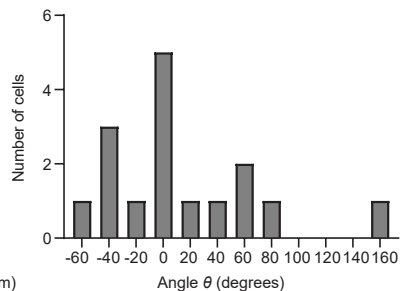**C**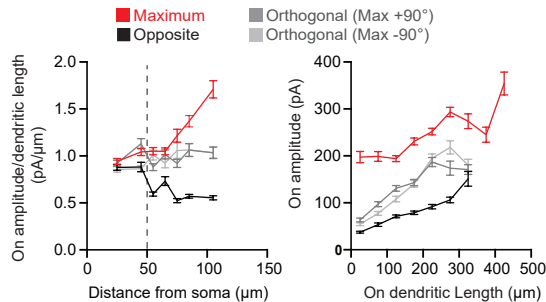**D**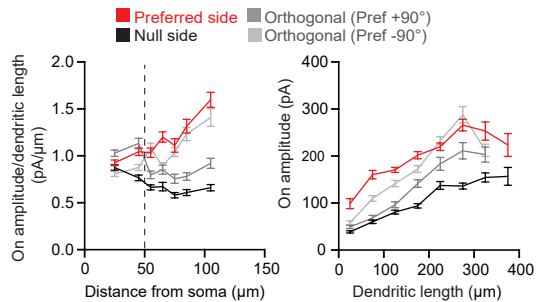**E**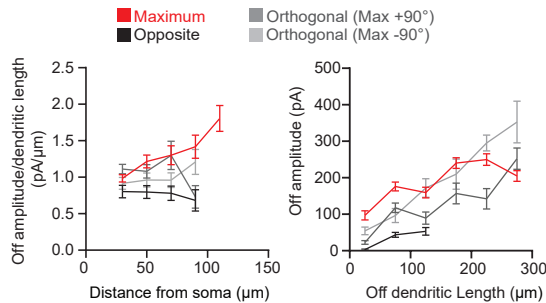**F**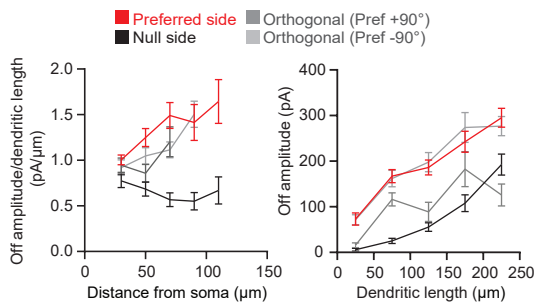

Supplement: supp [file elife-68181-supp-v1.zip]

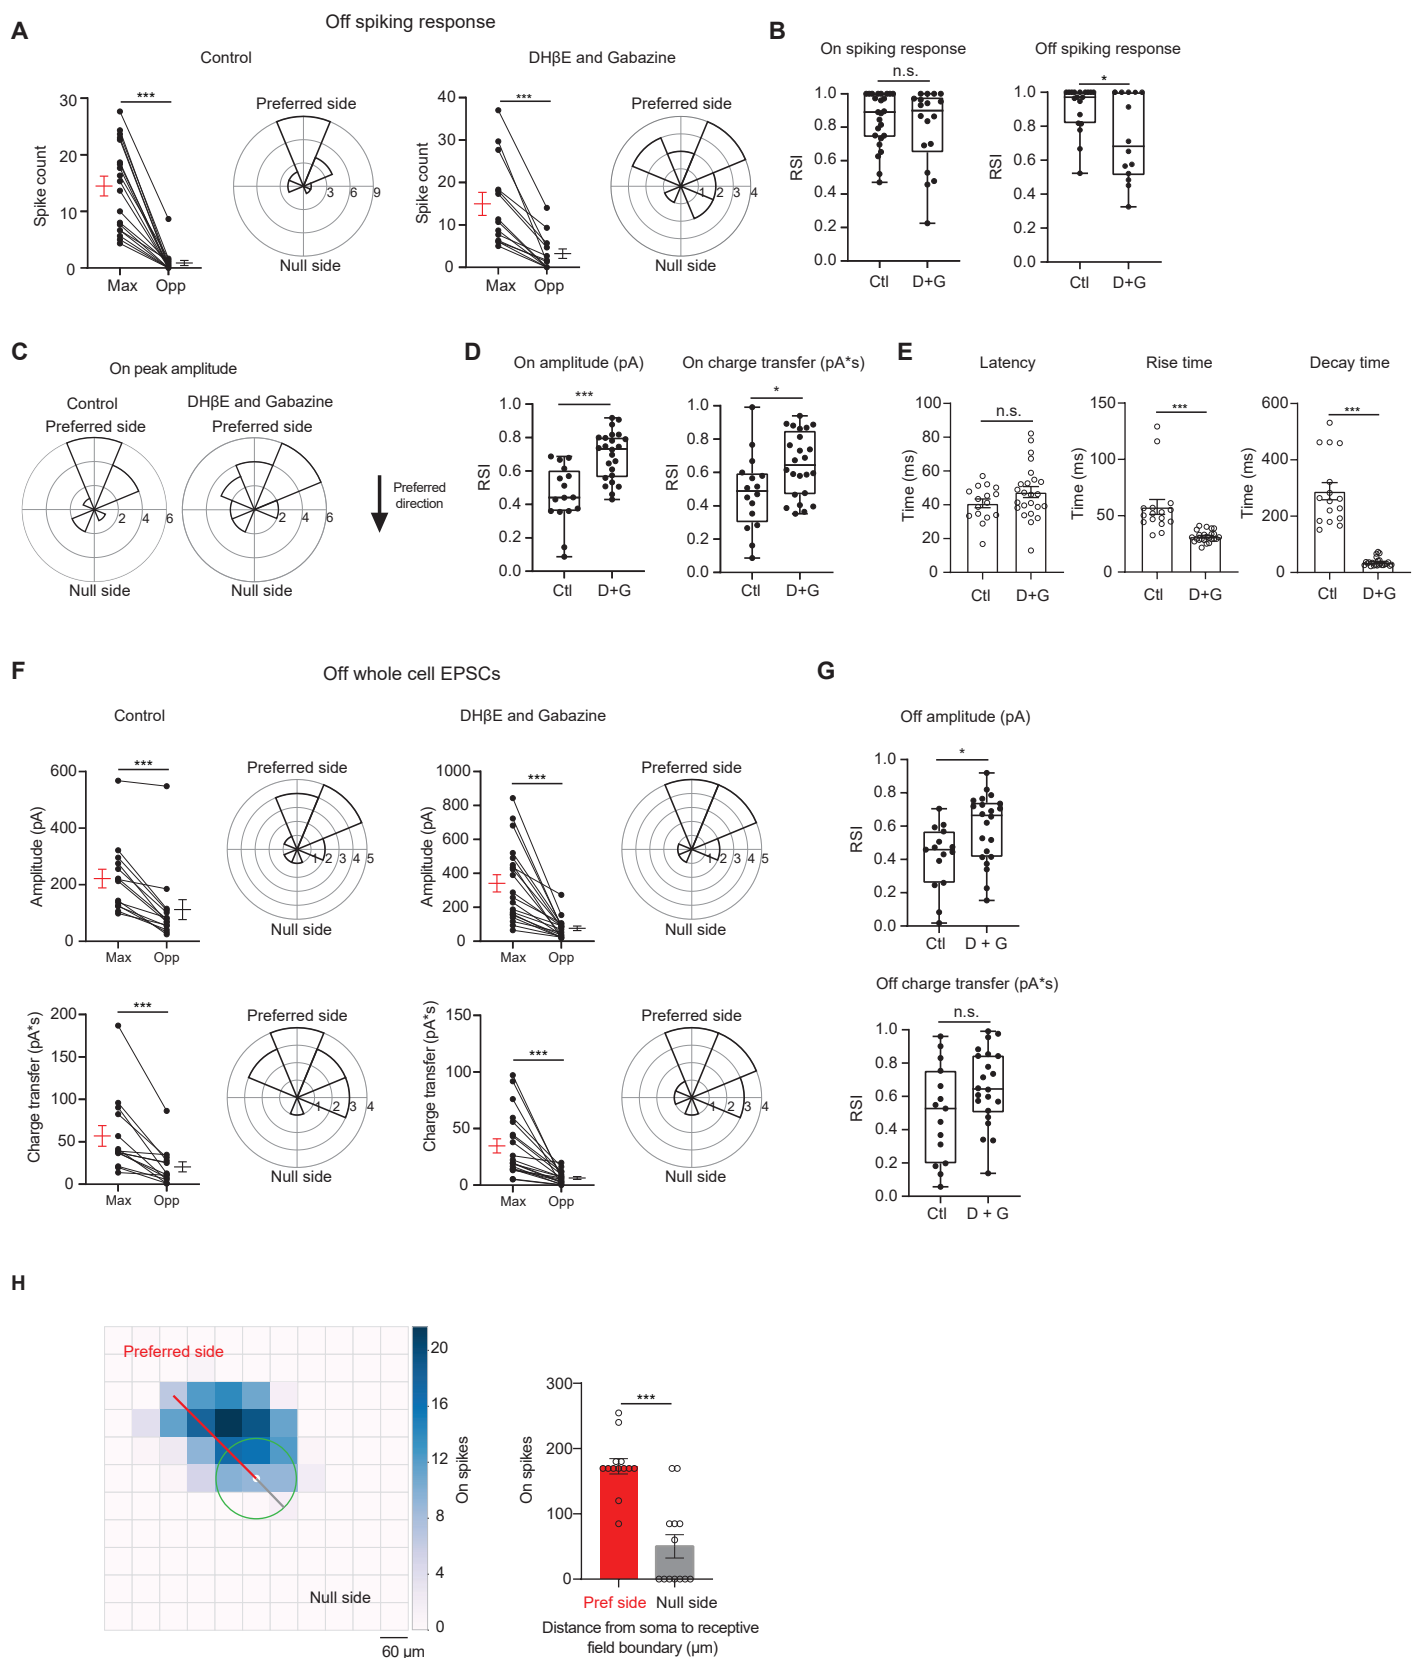

Supplement: supp [file elife-68181-supp-v1.zip]

**A** Density of bipolar ribbons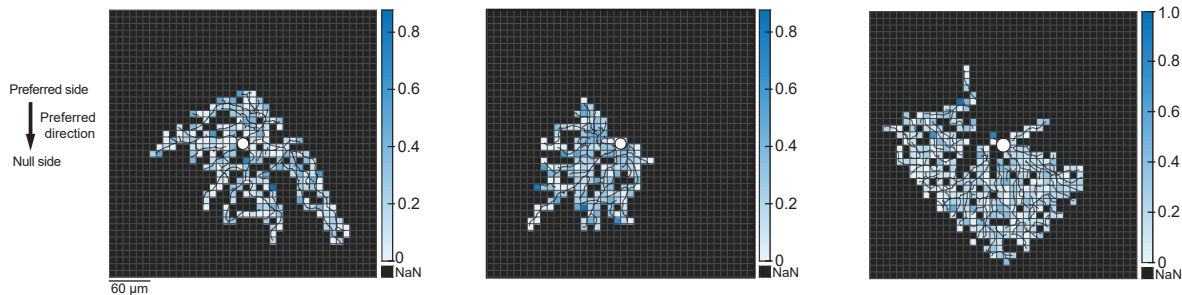**B**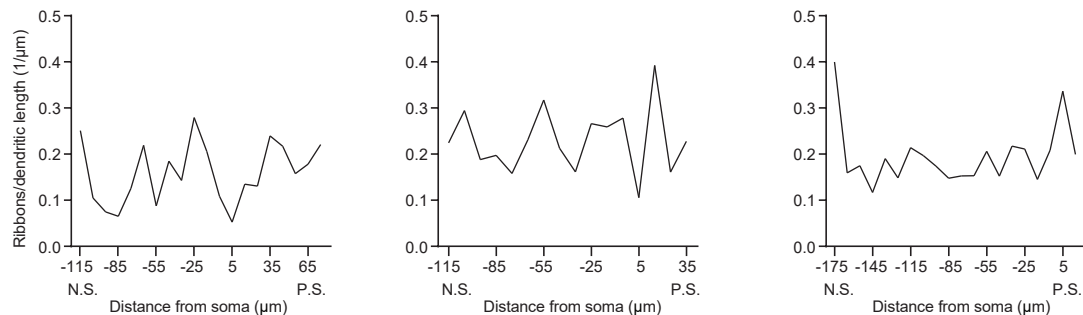**C**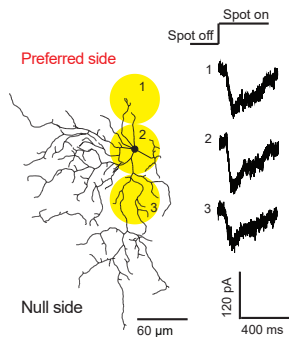**D**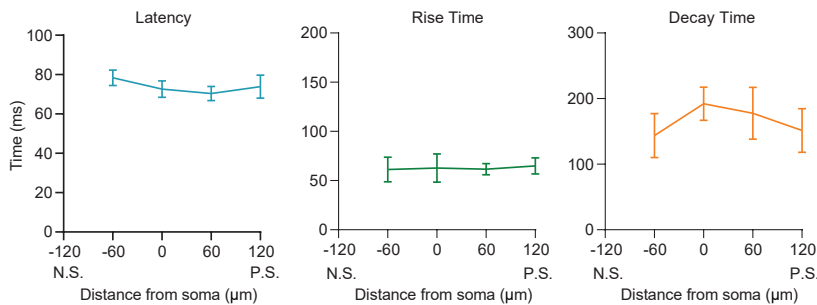

Supplement: supp [file elife-68181-supp-v1.zip]
